# Supplementary material for: Pan cancer characterization of genes whose expression has been associated with LINE-1 antisense promoter activity
Source: PubMed Central journal article supplement (PMC10506190; doi:10.1186/s13100-023-00300-x), 2023-09-18

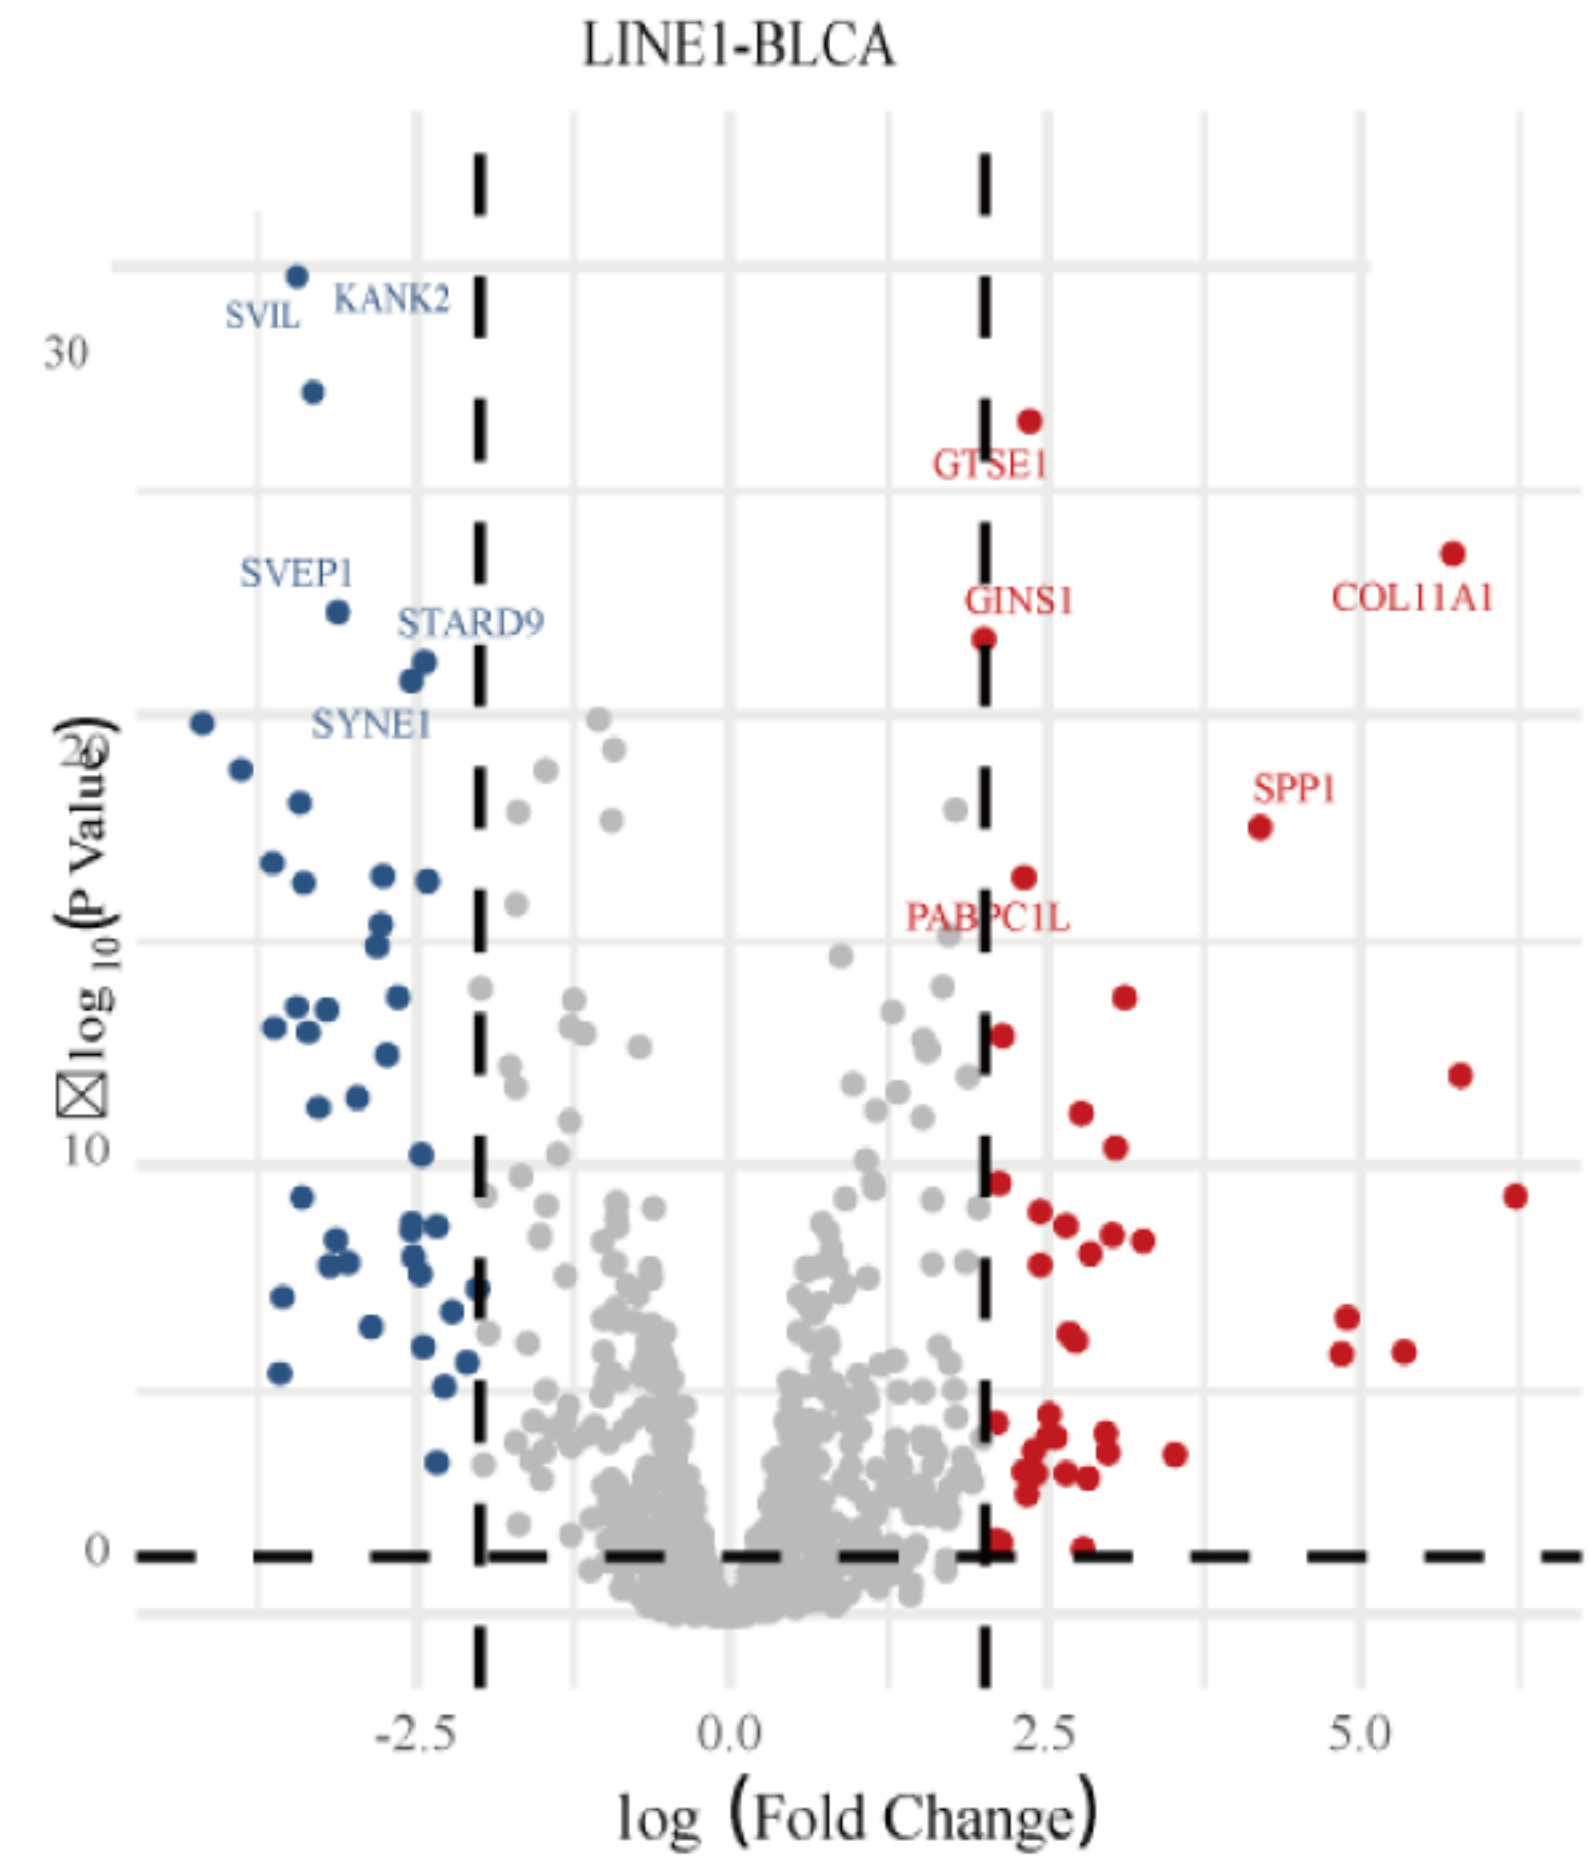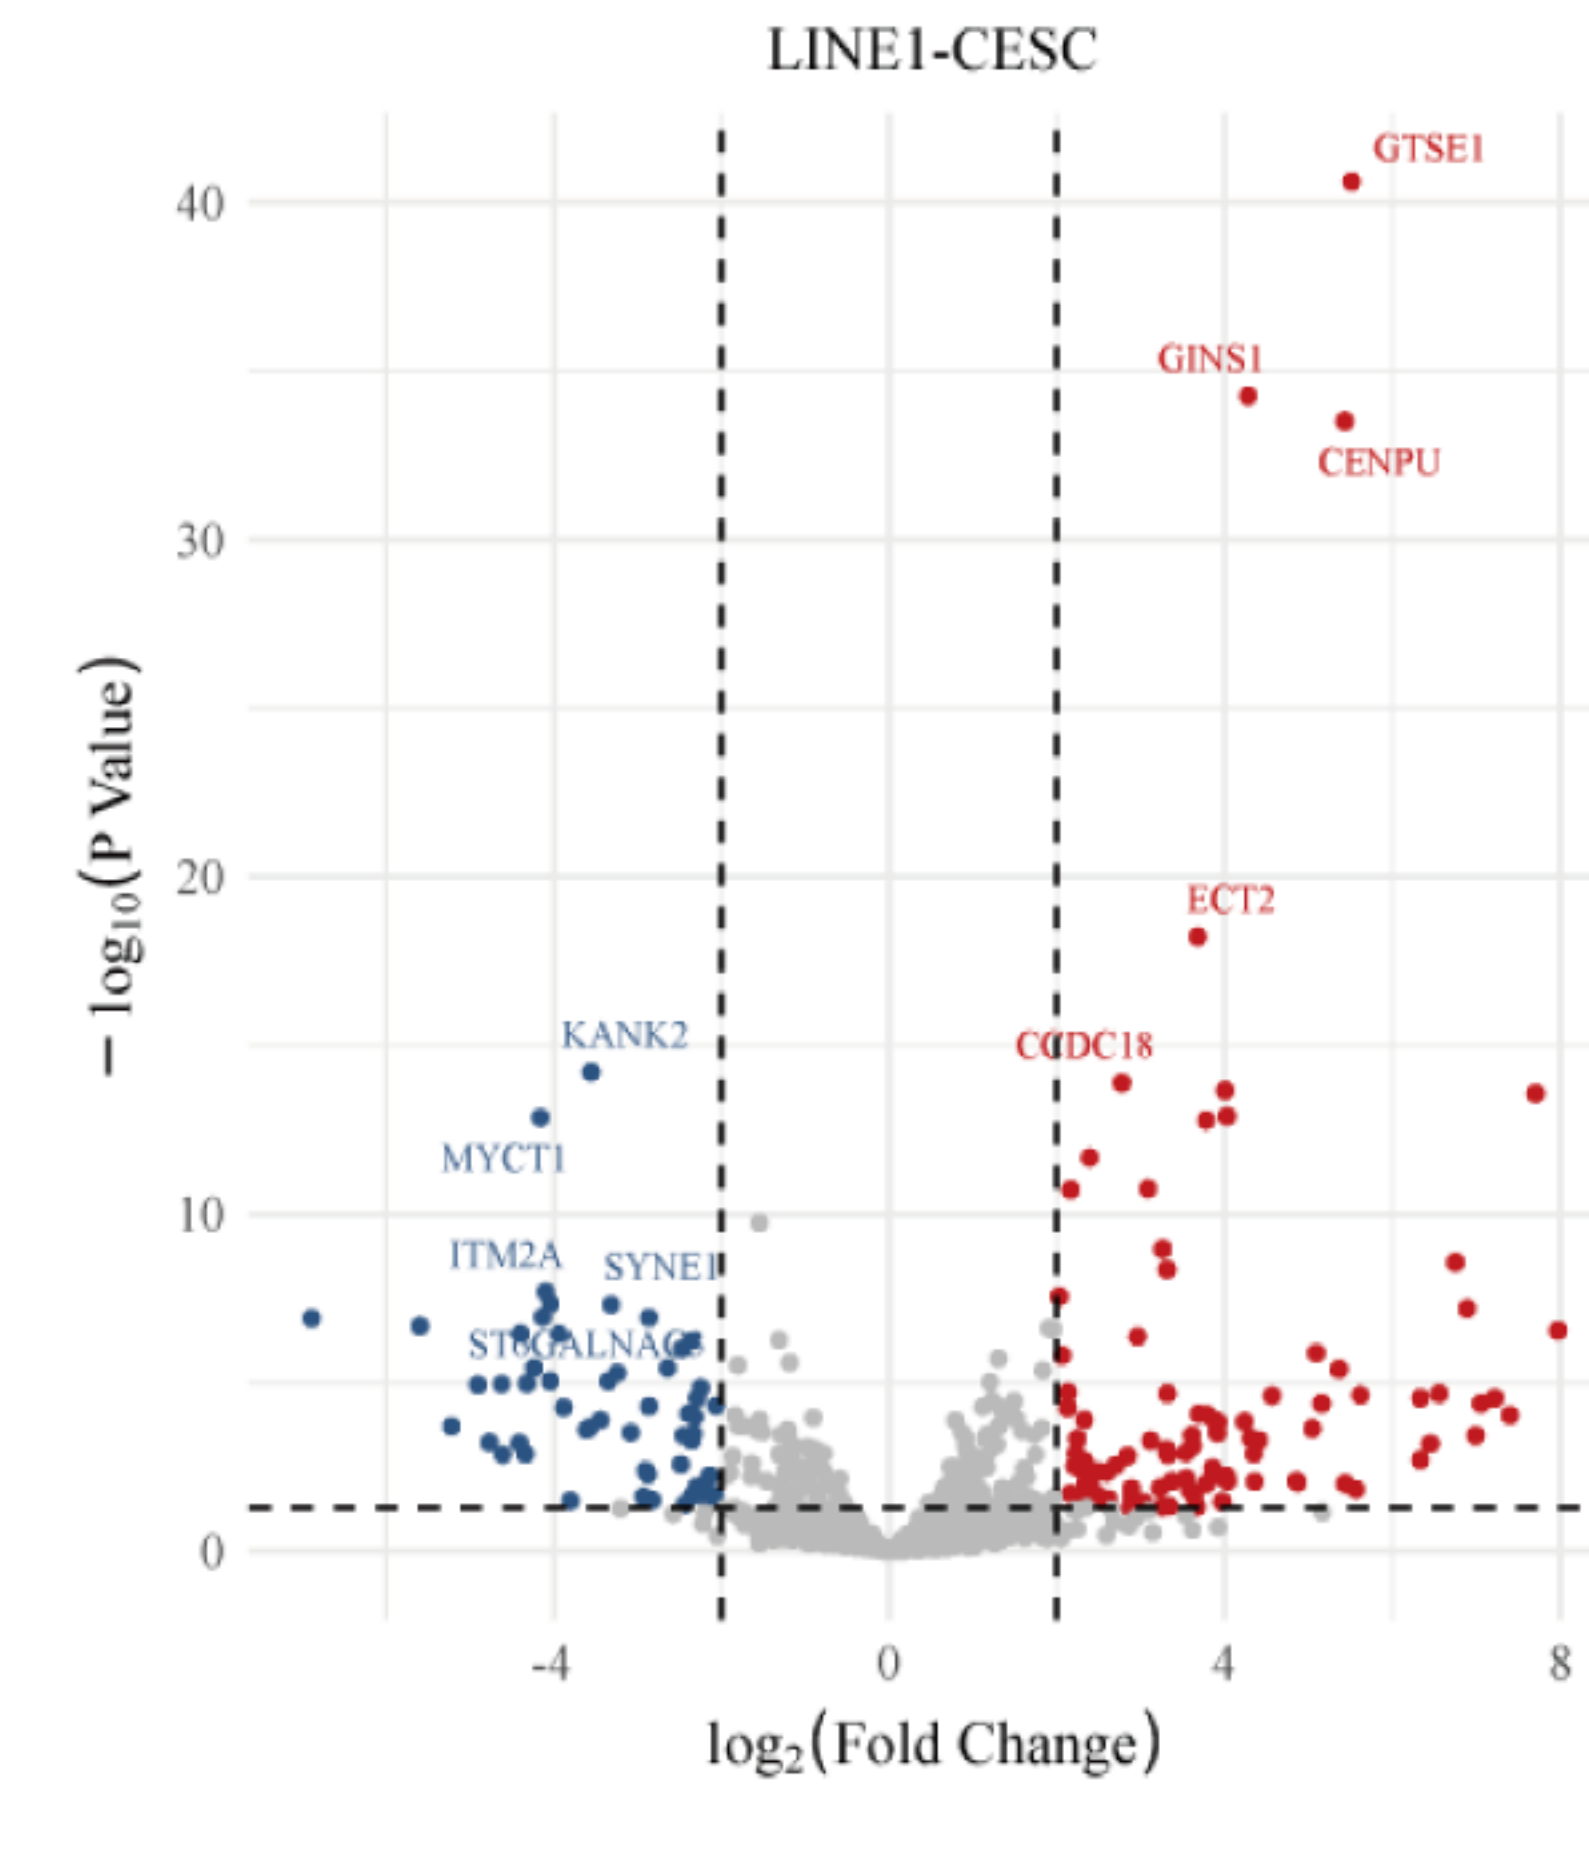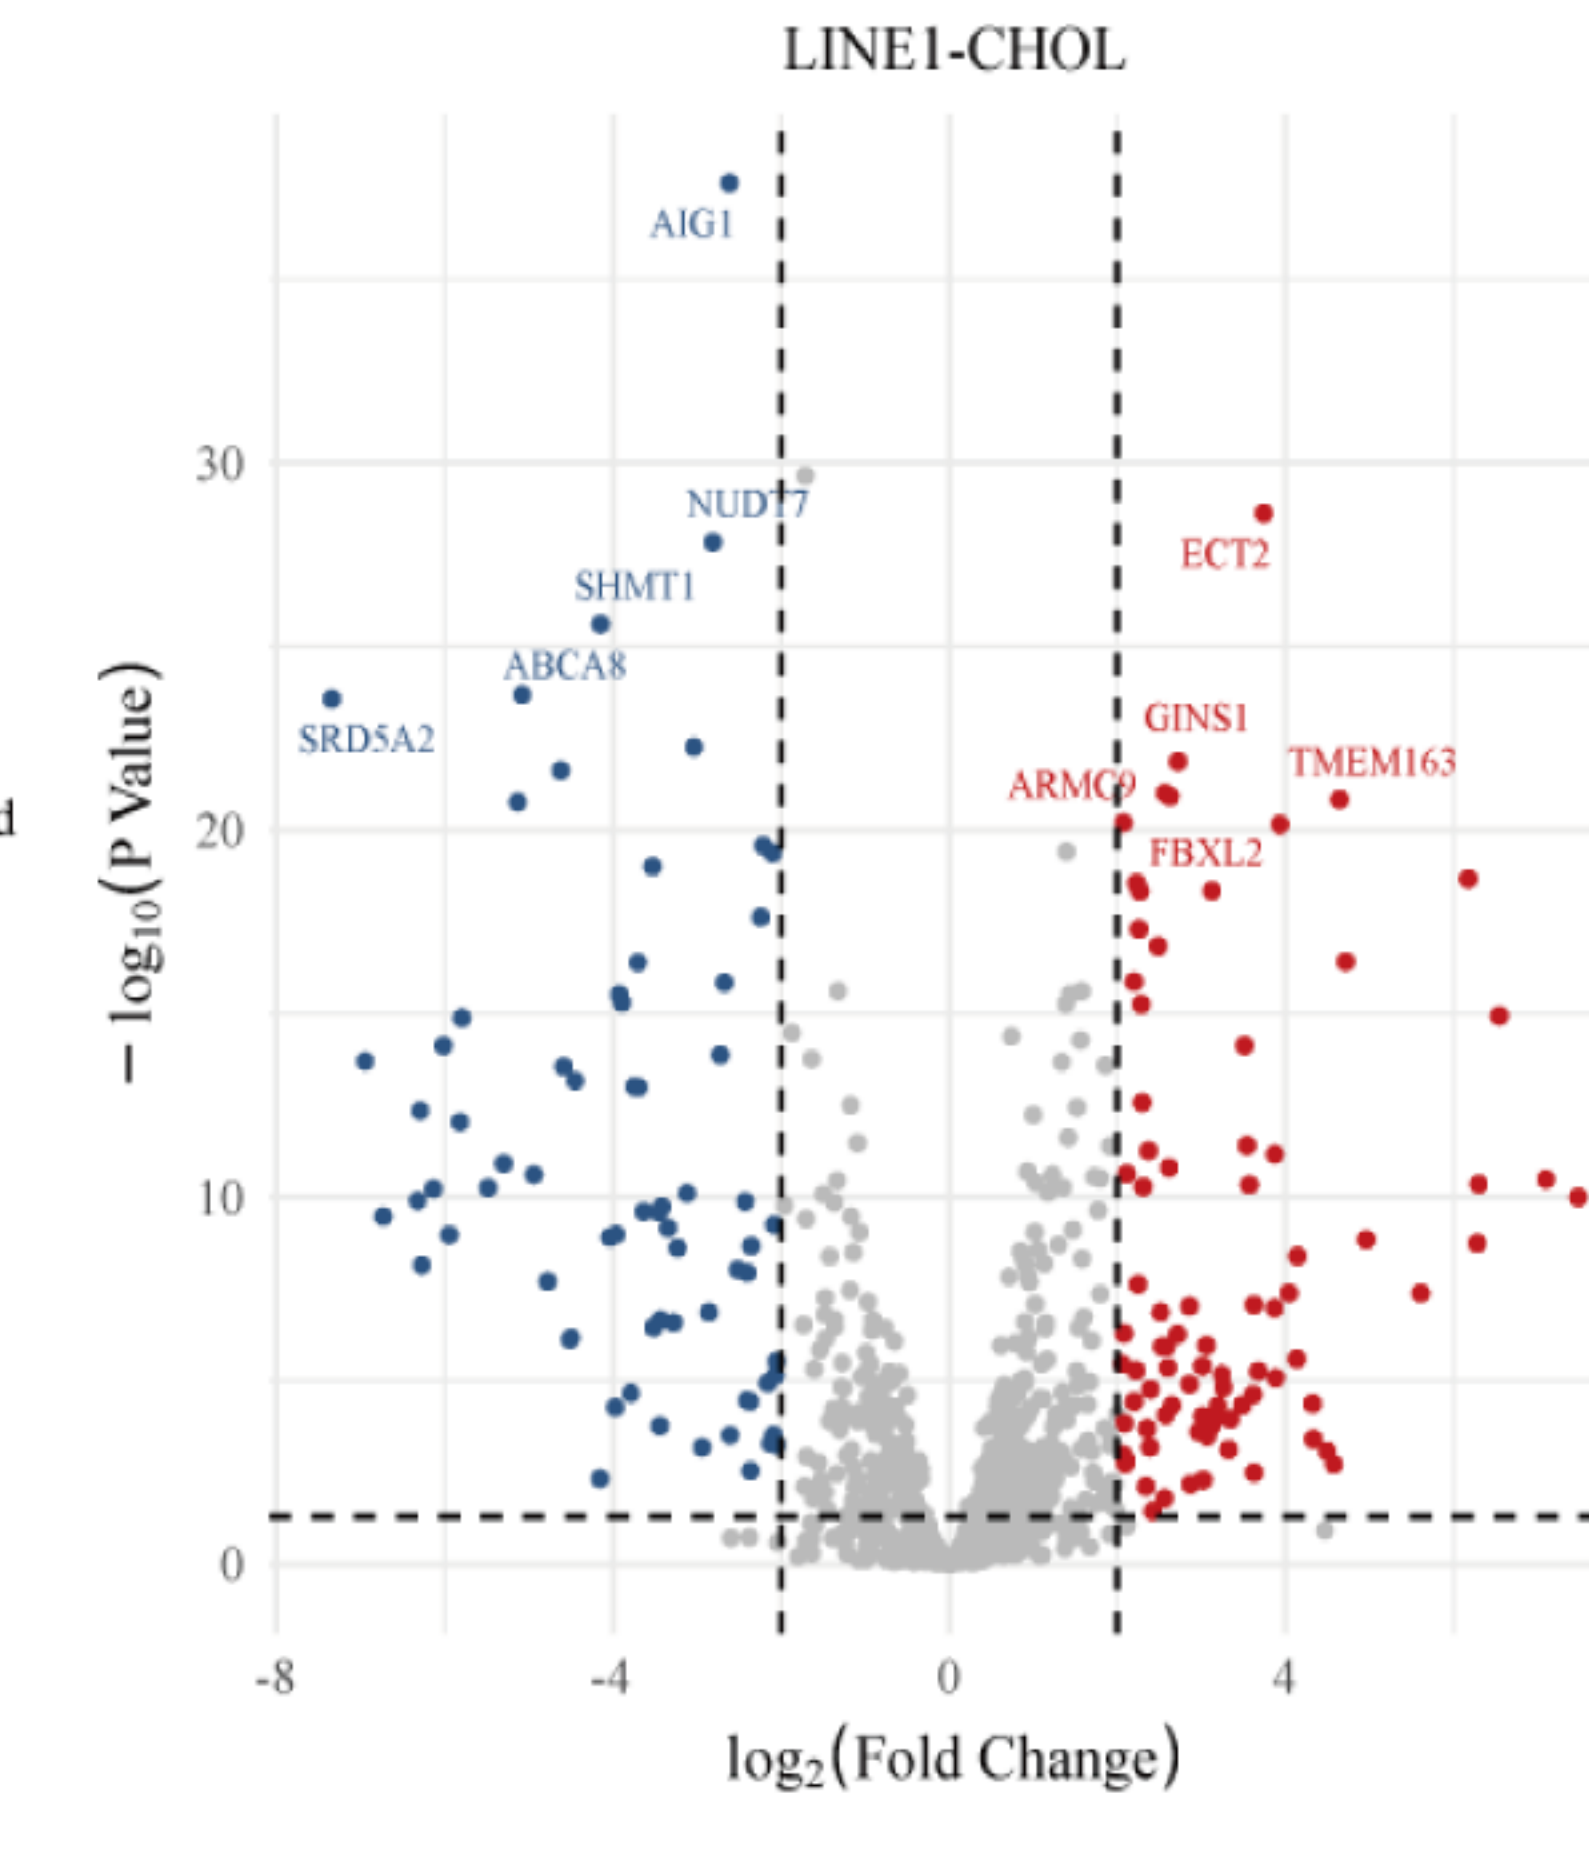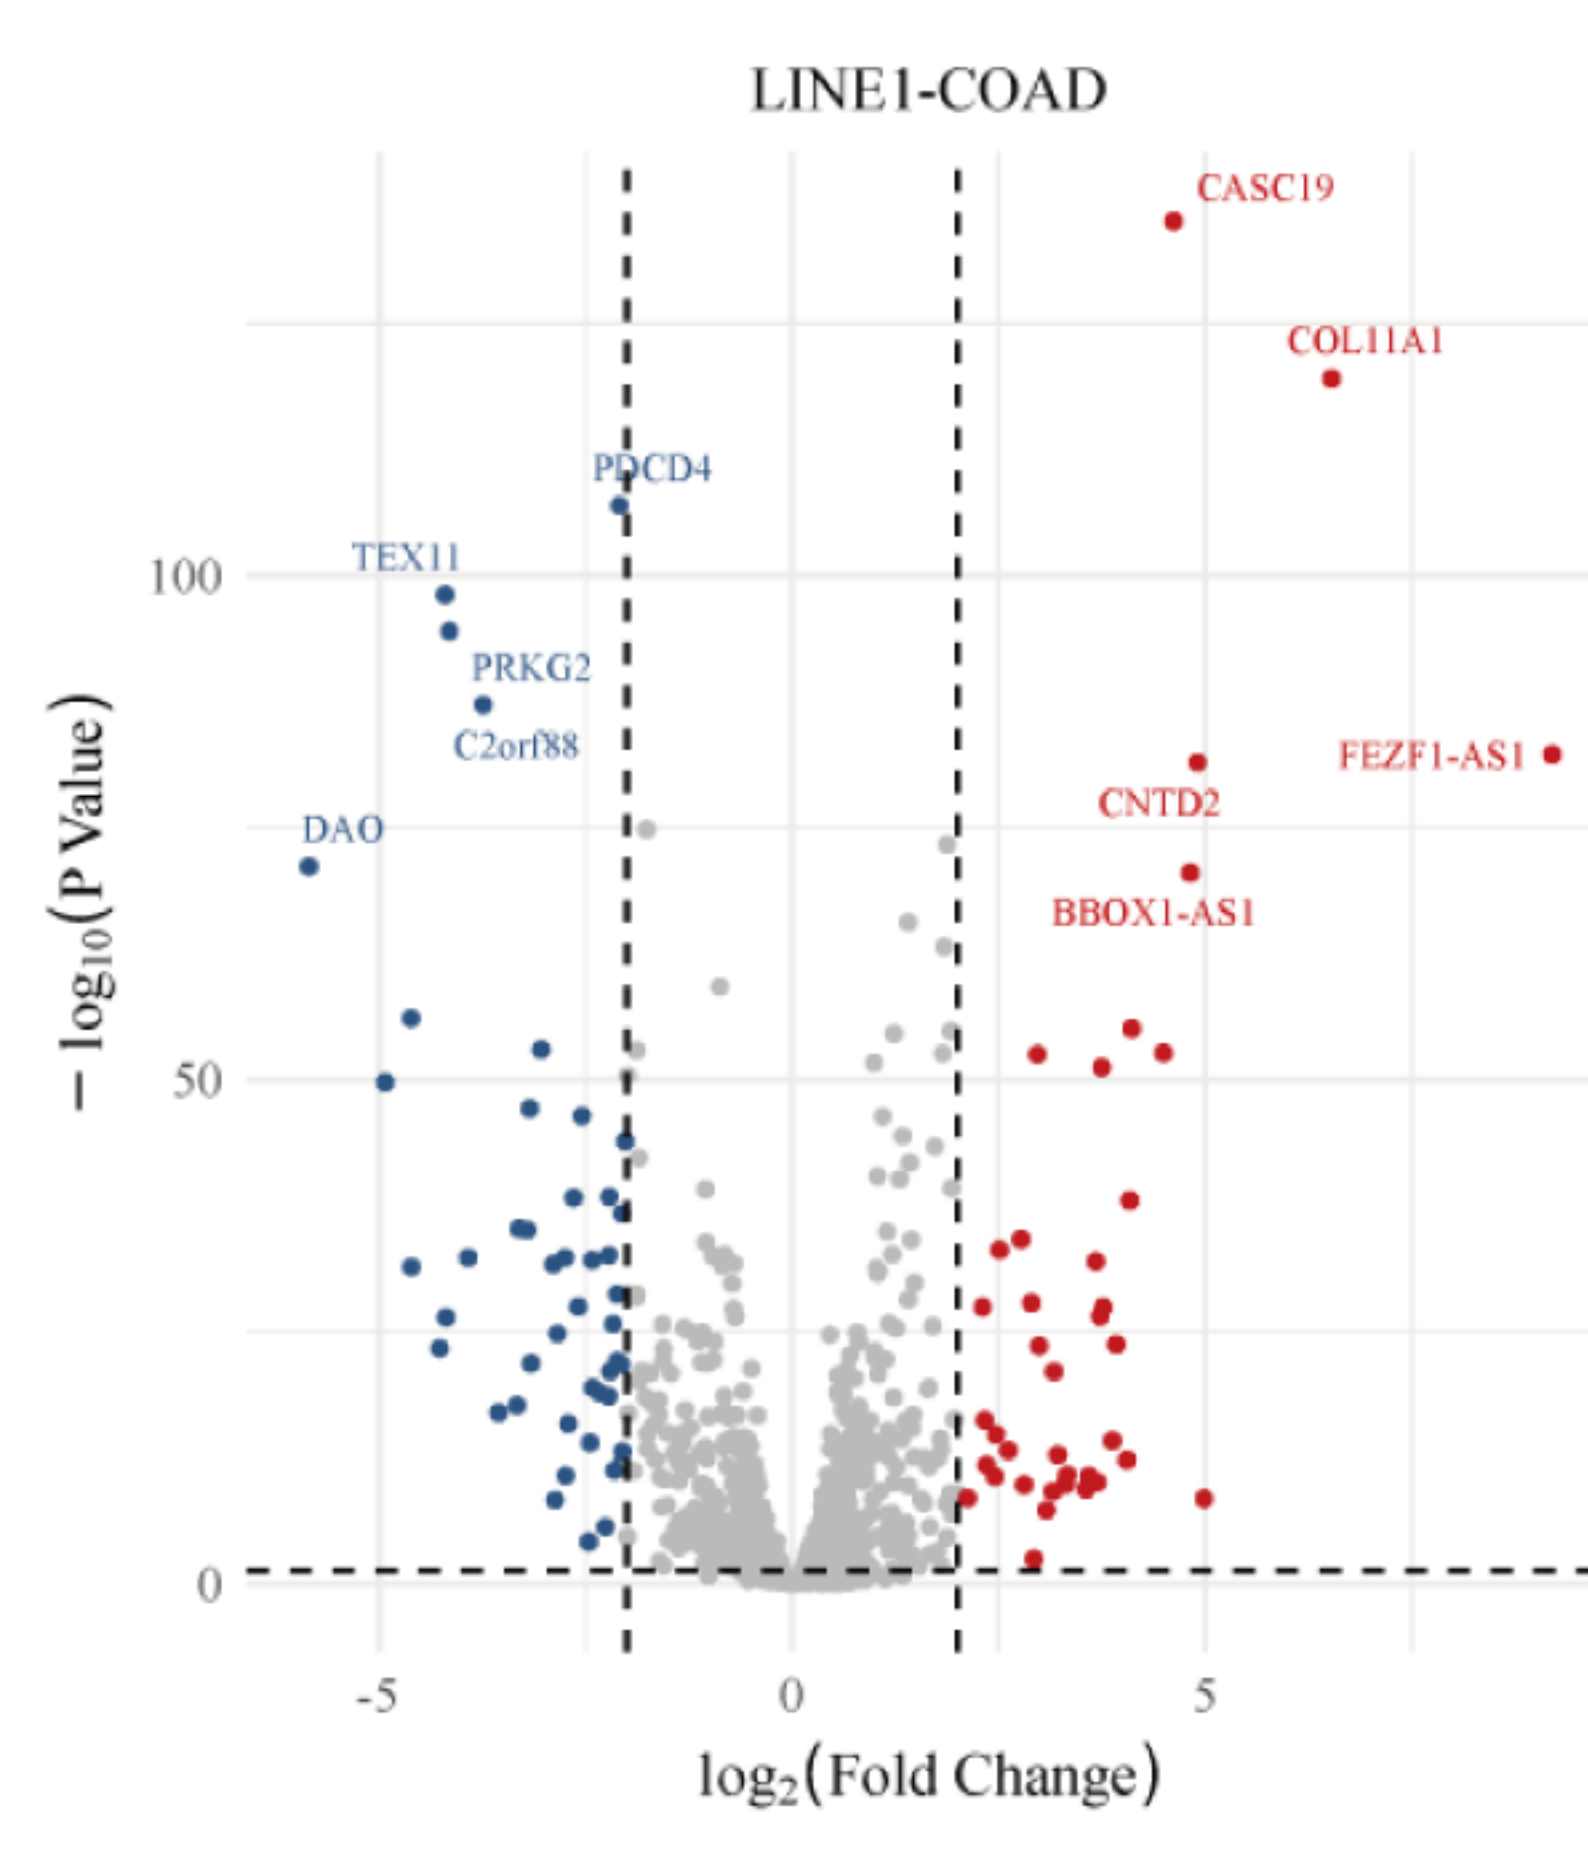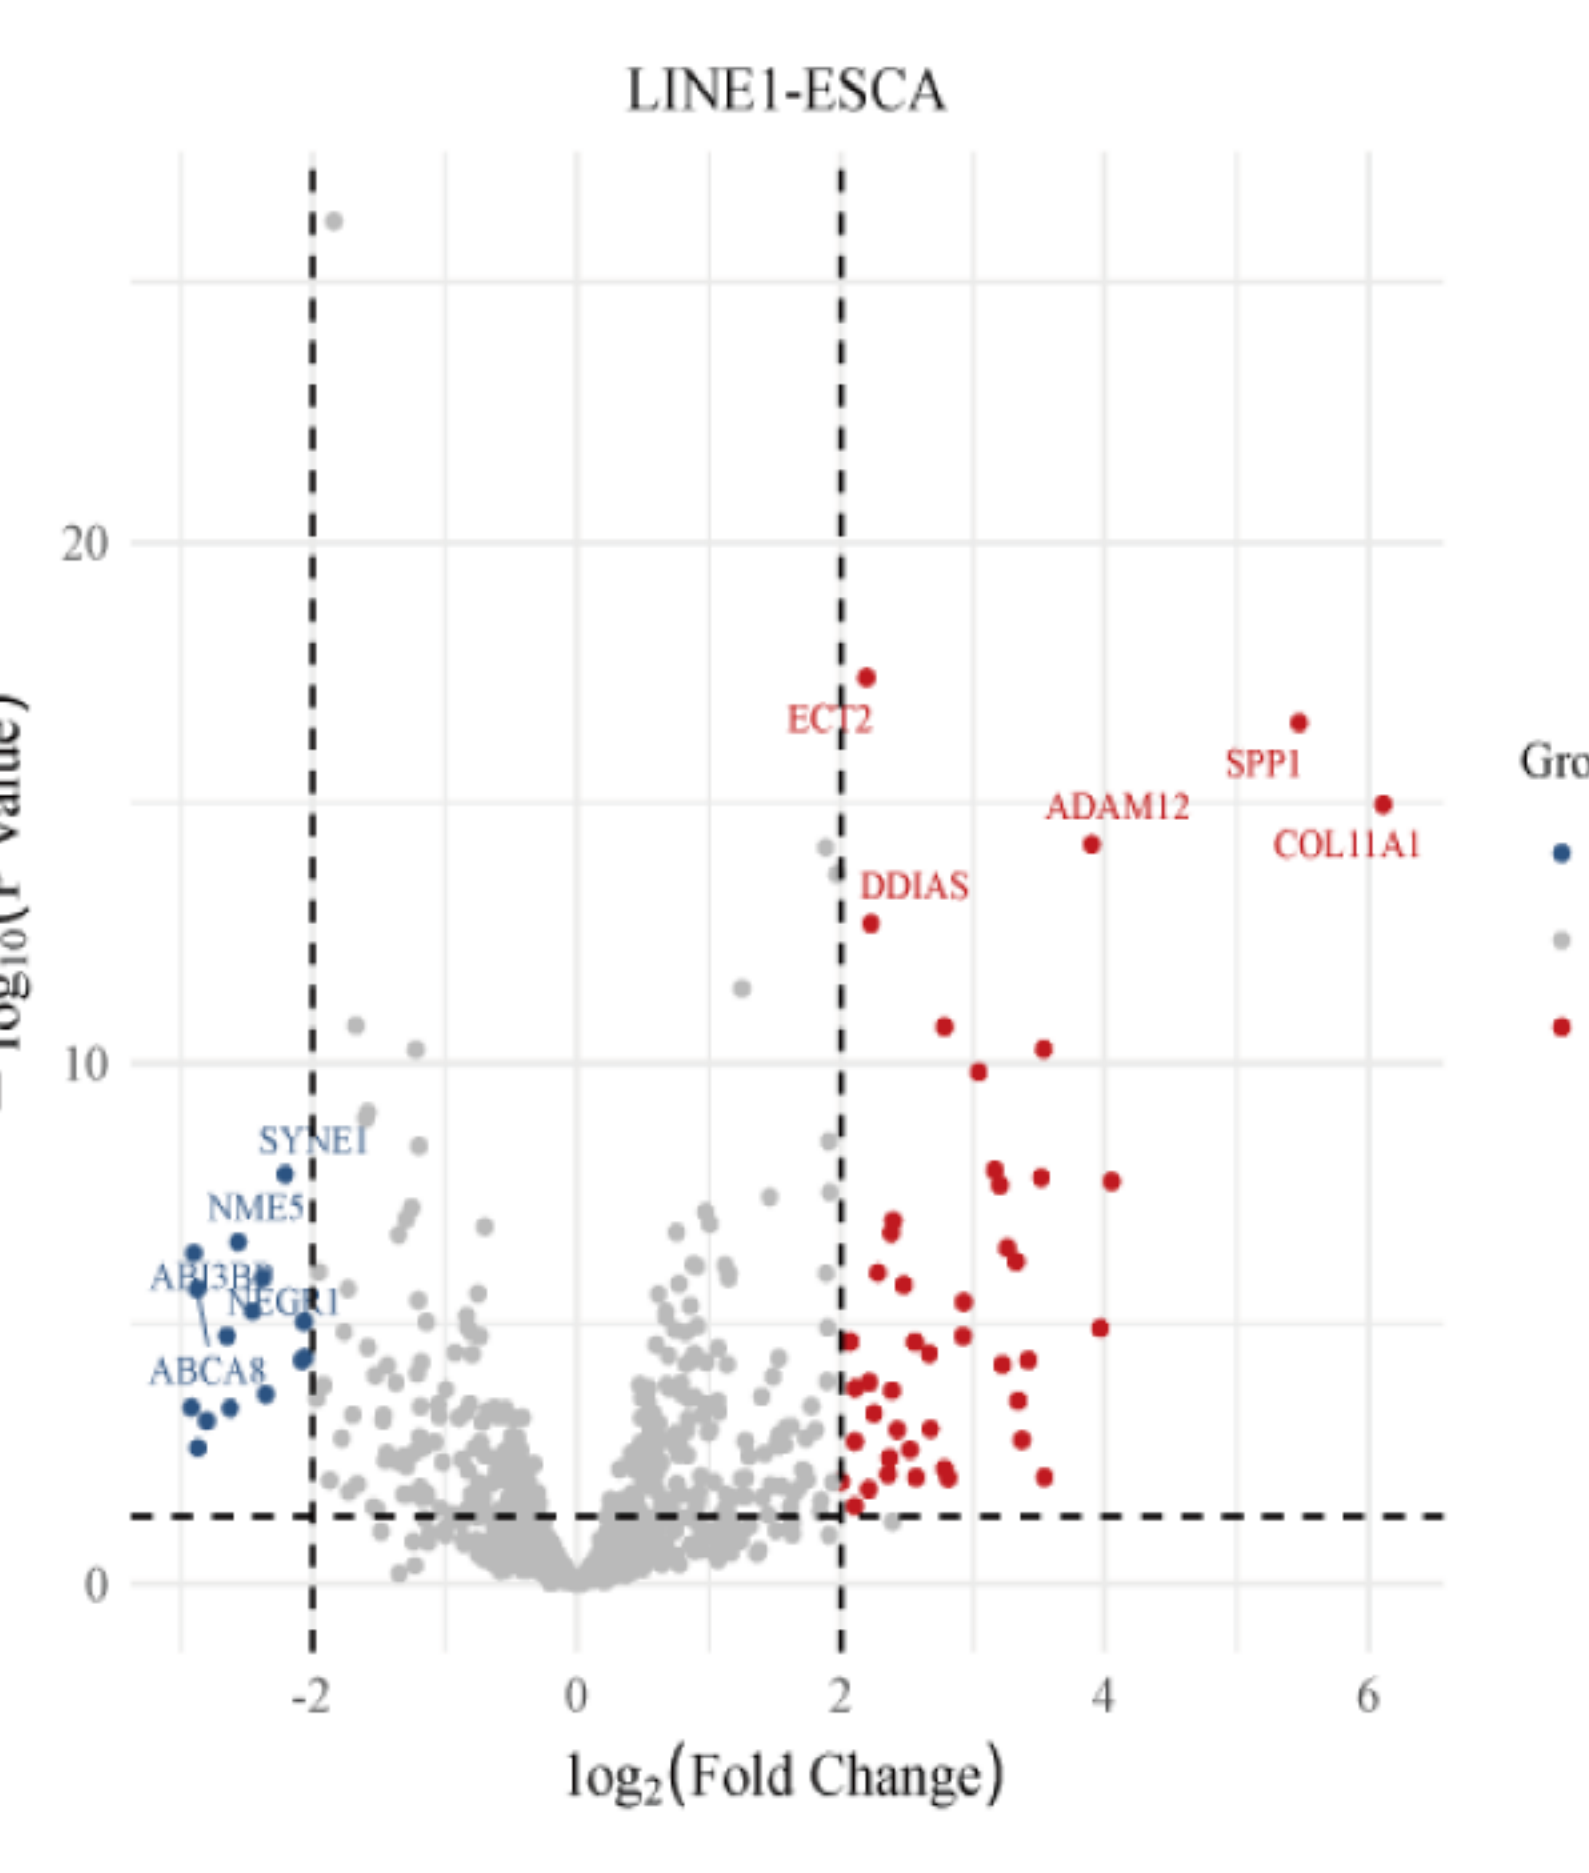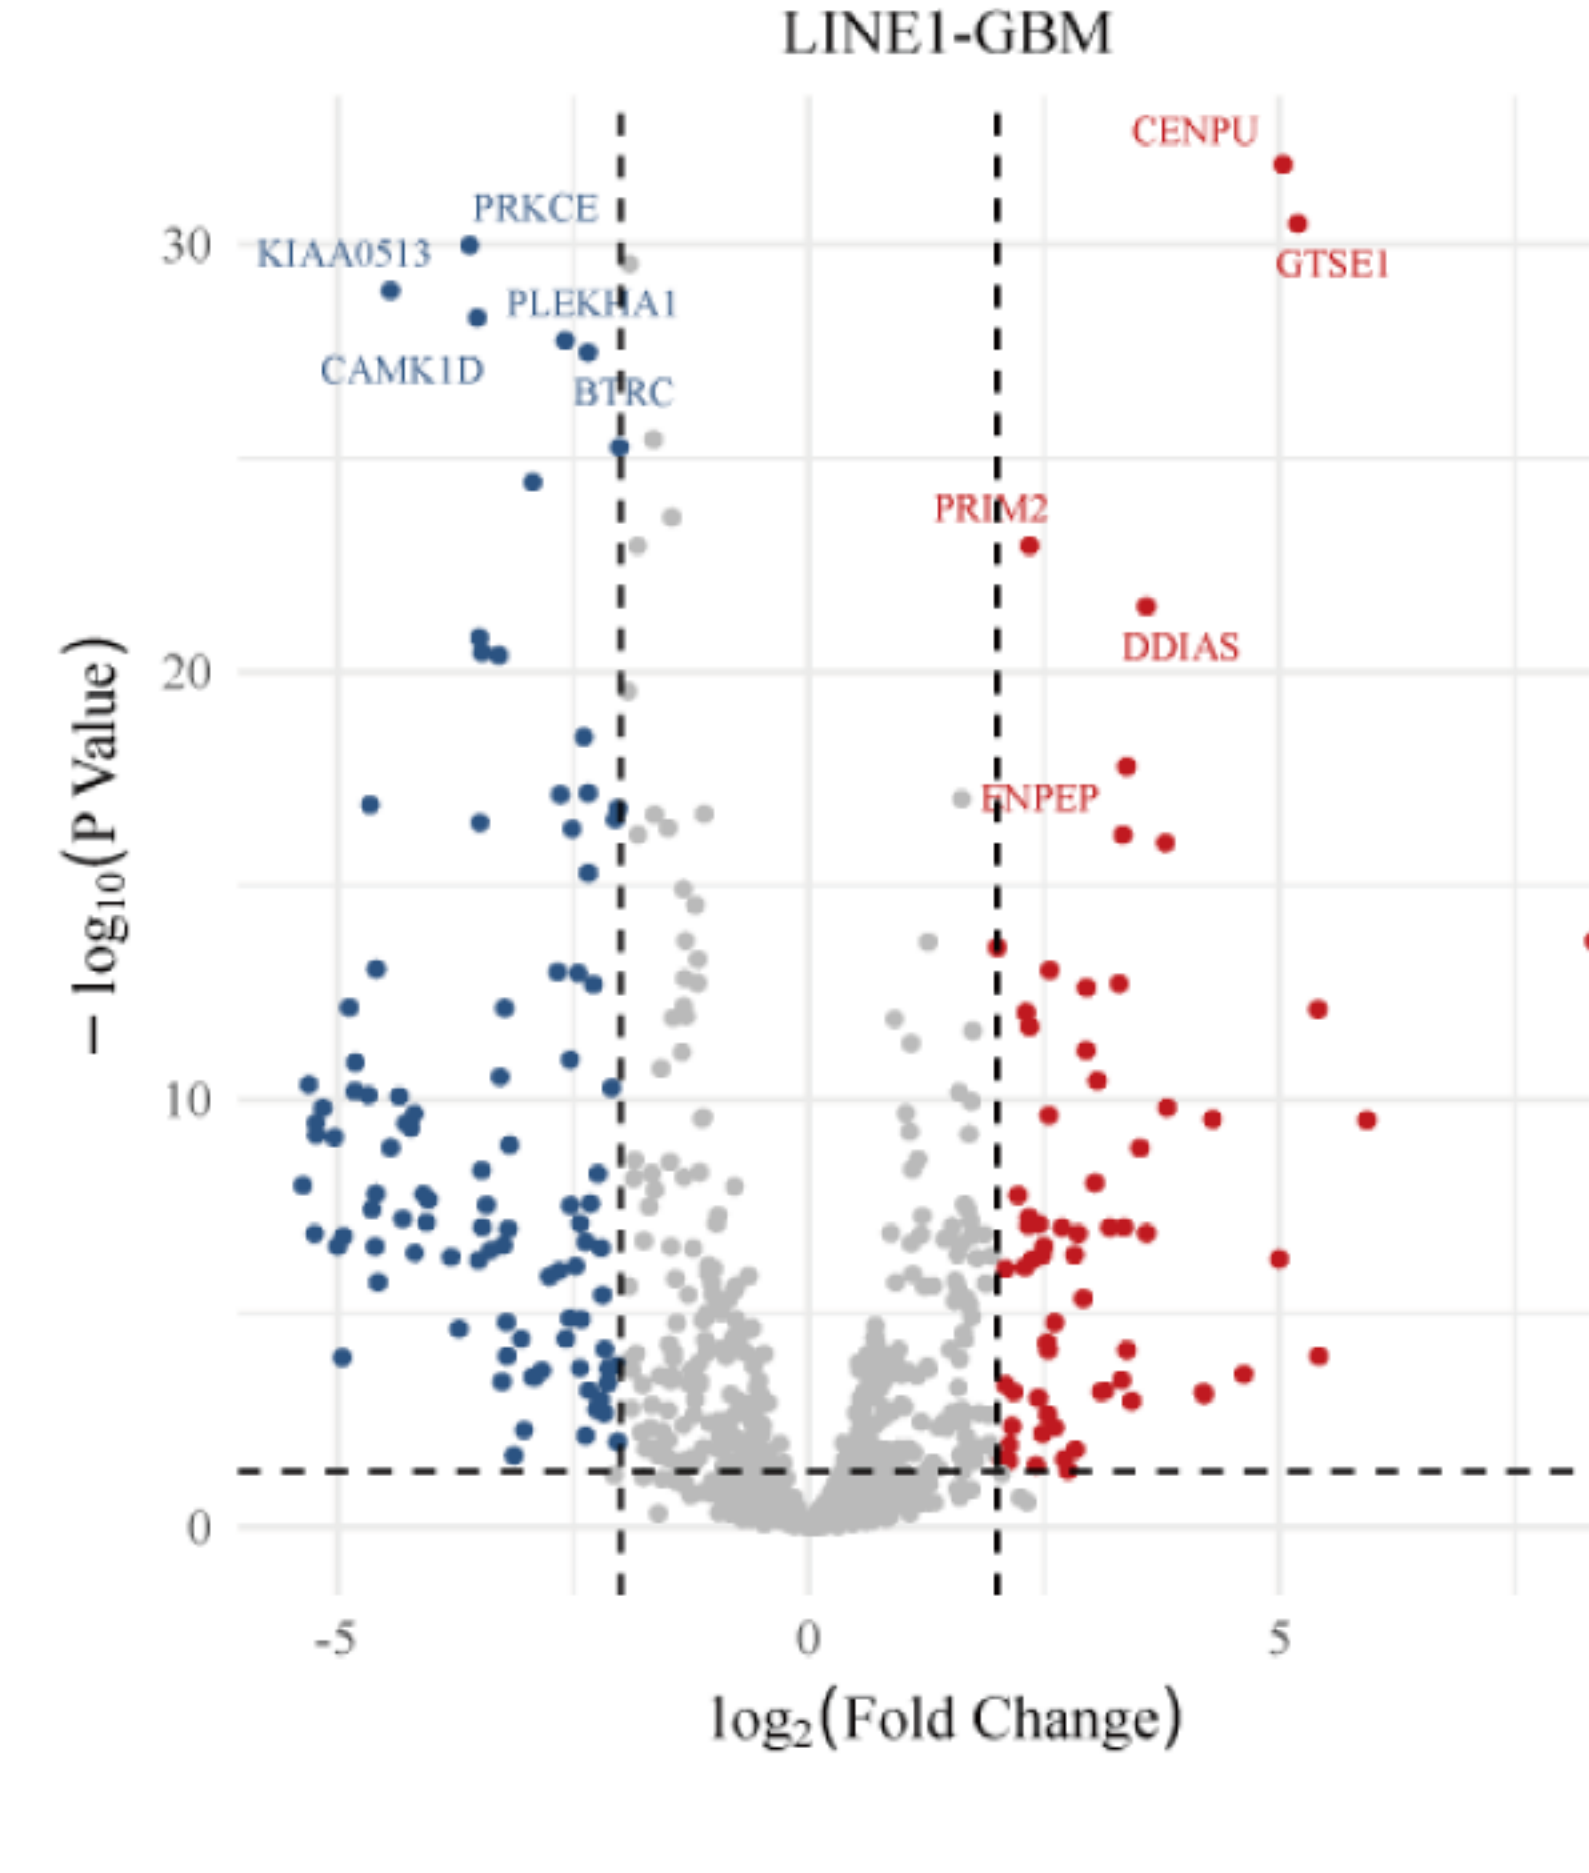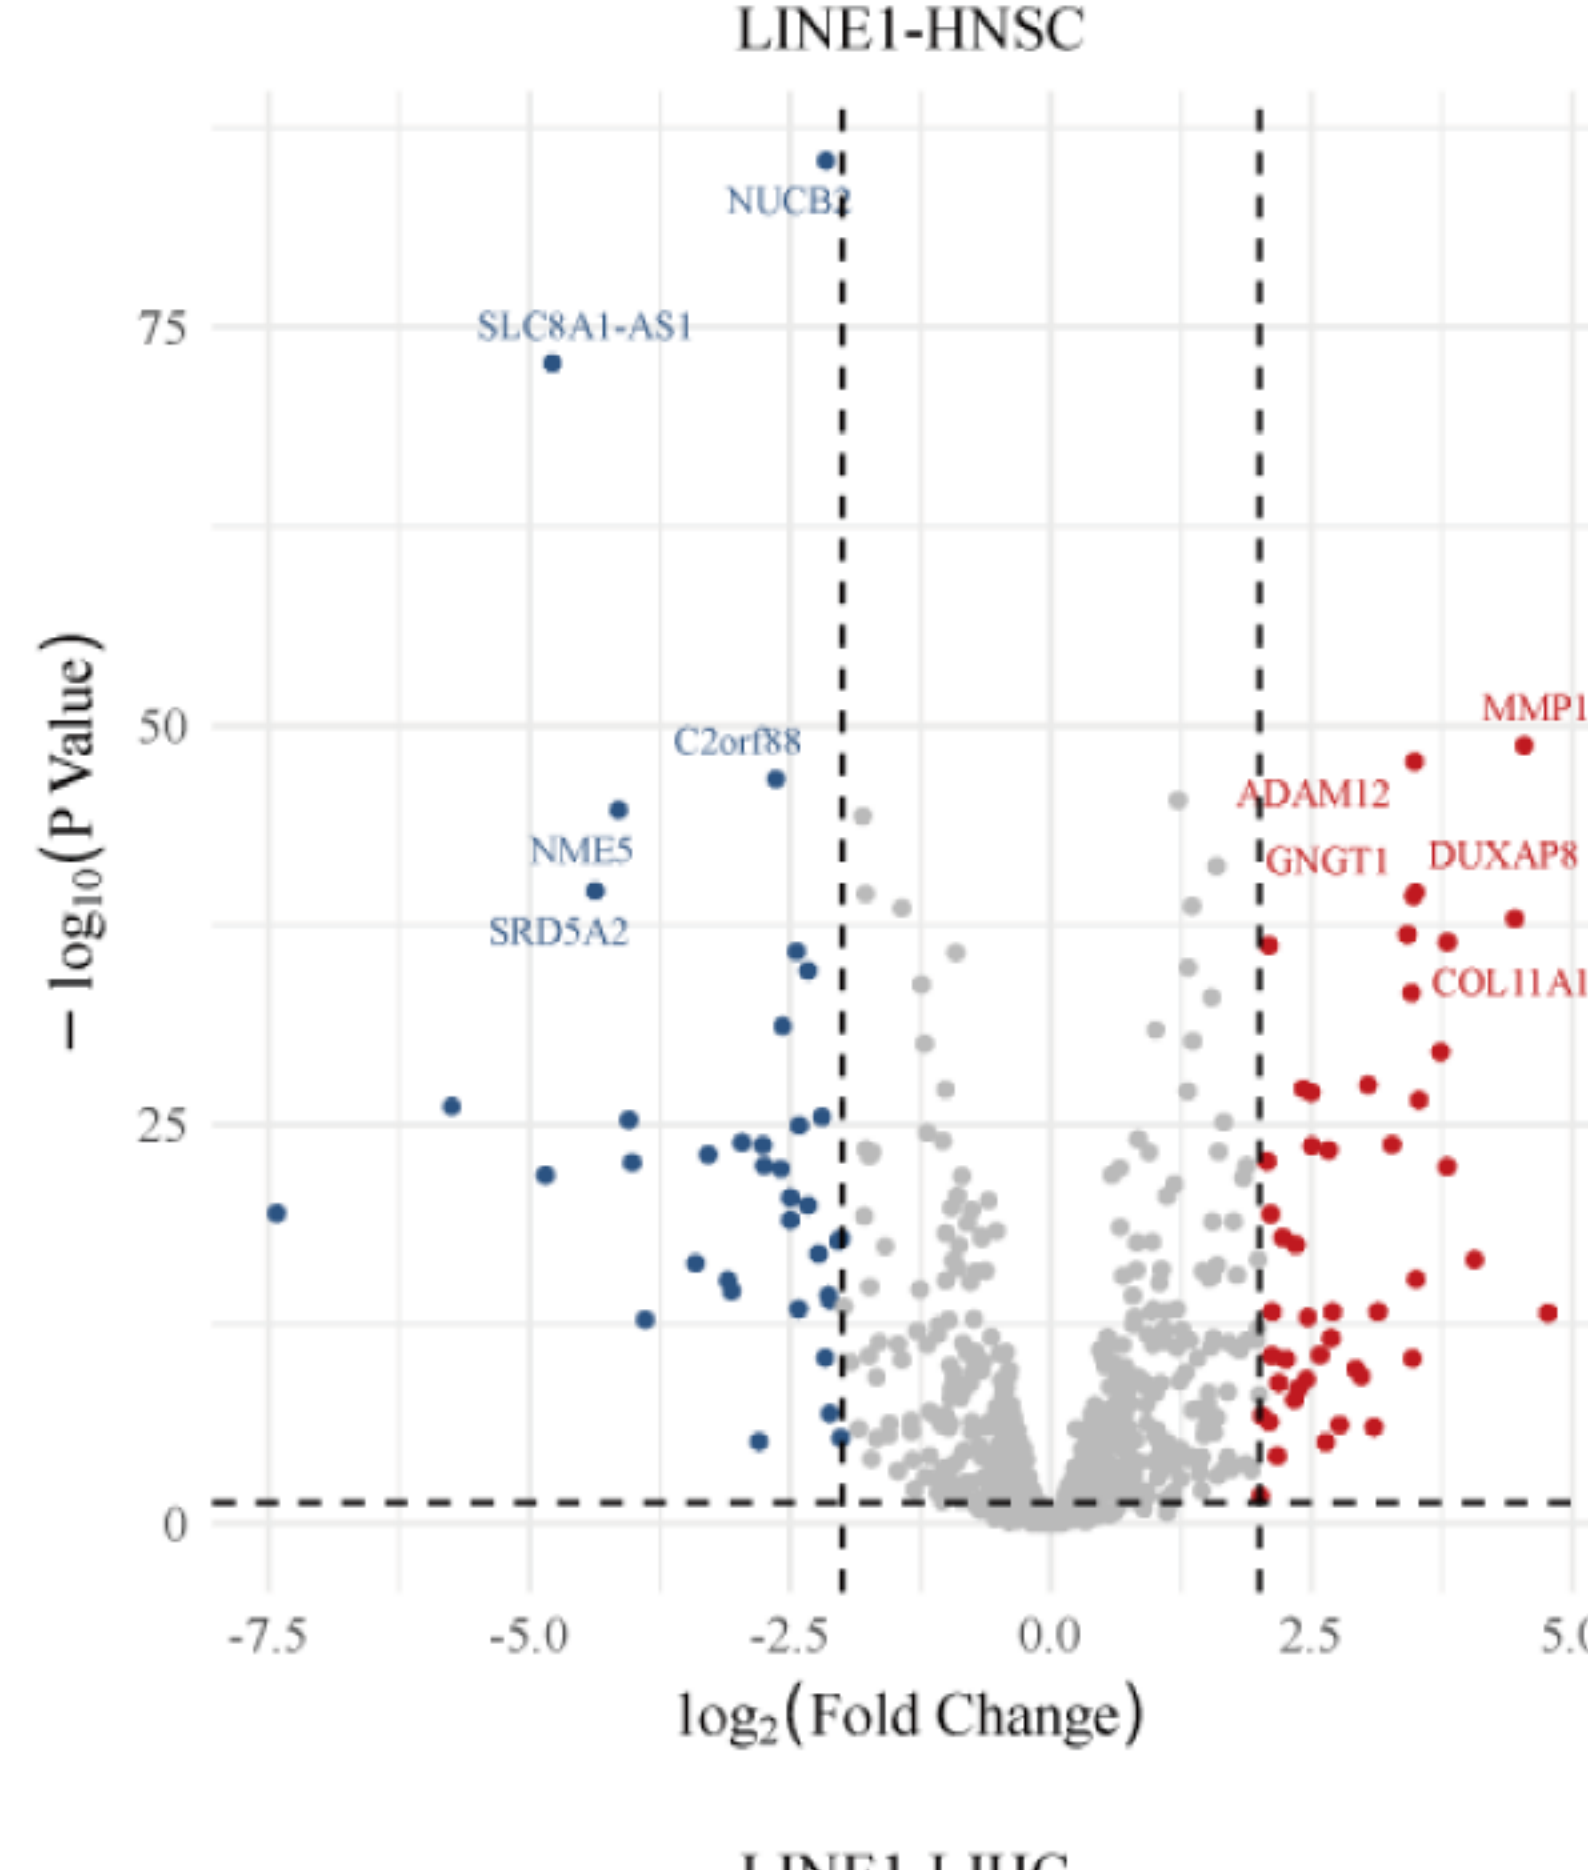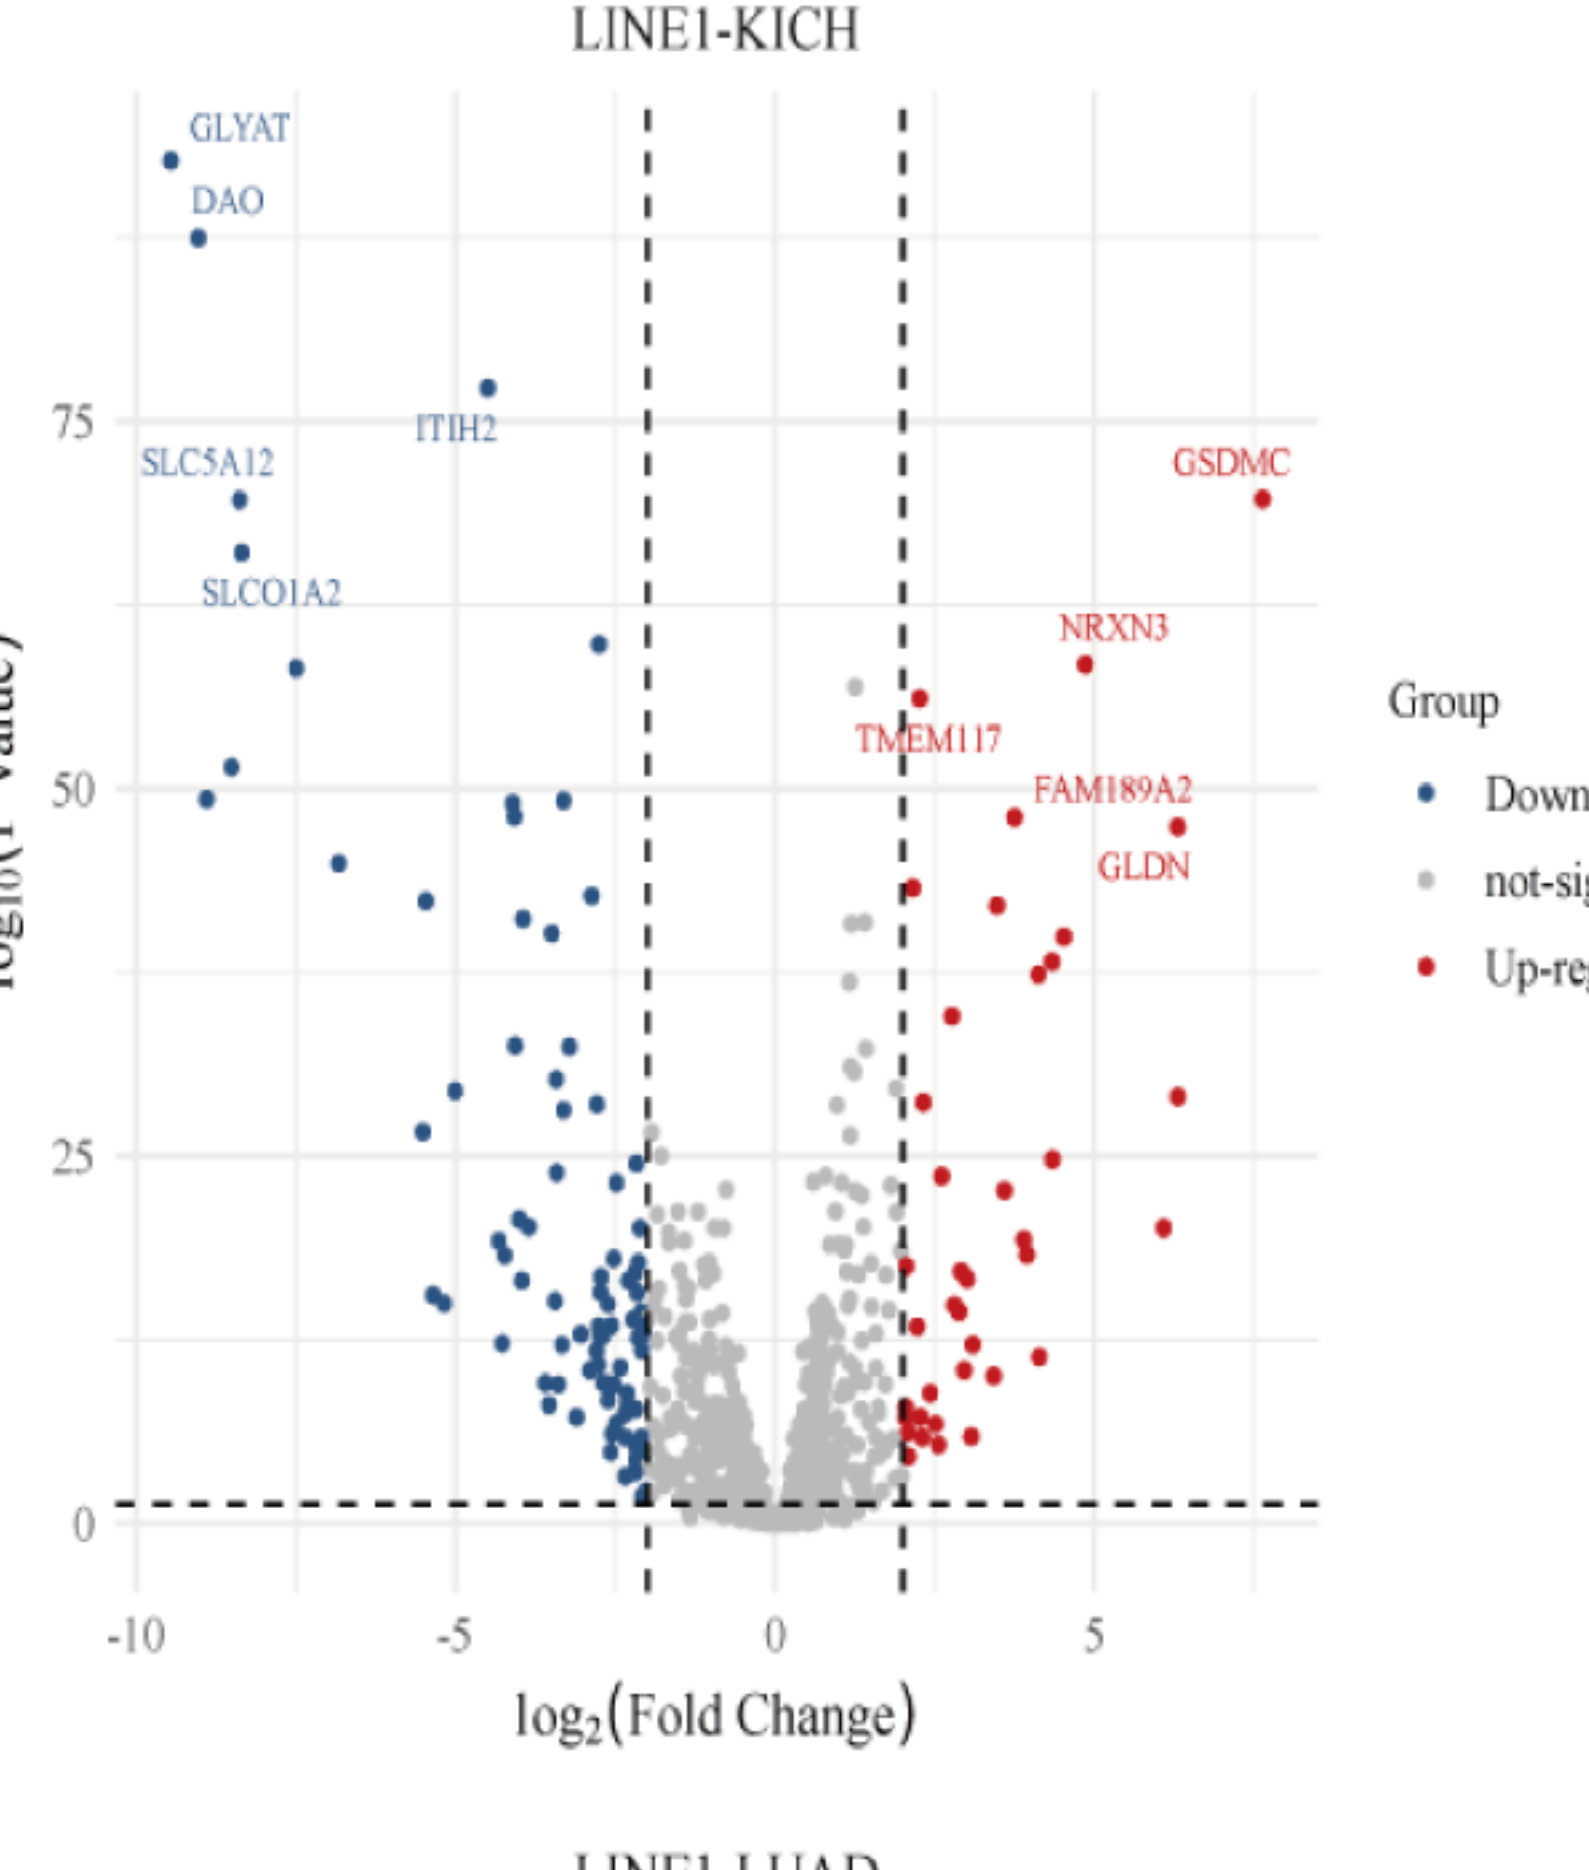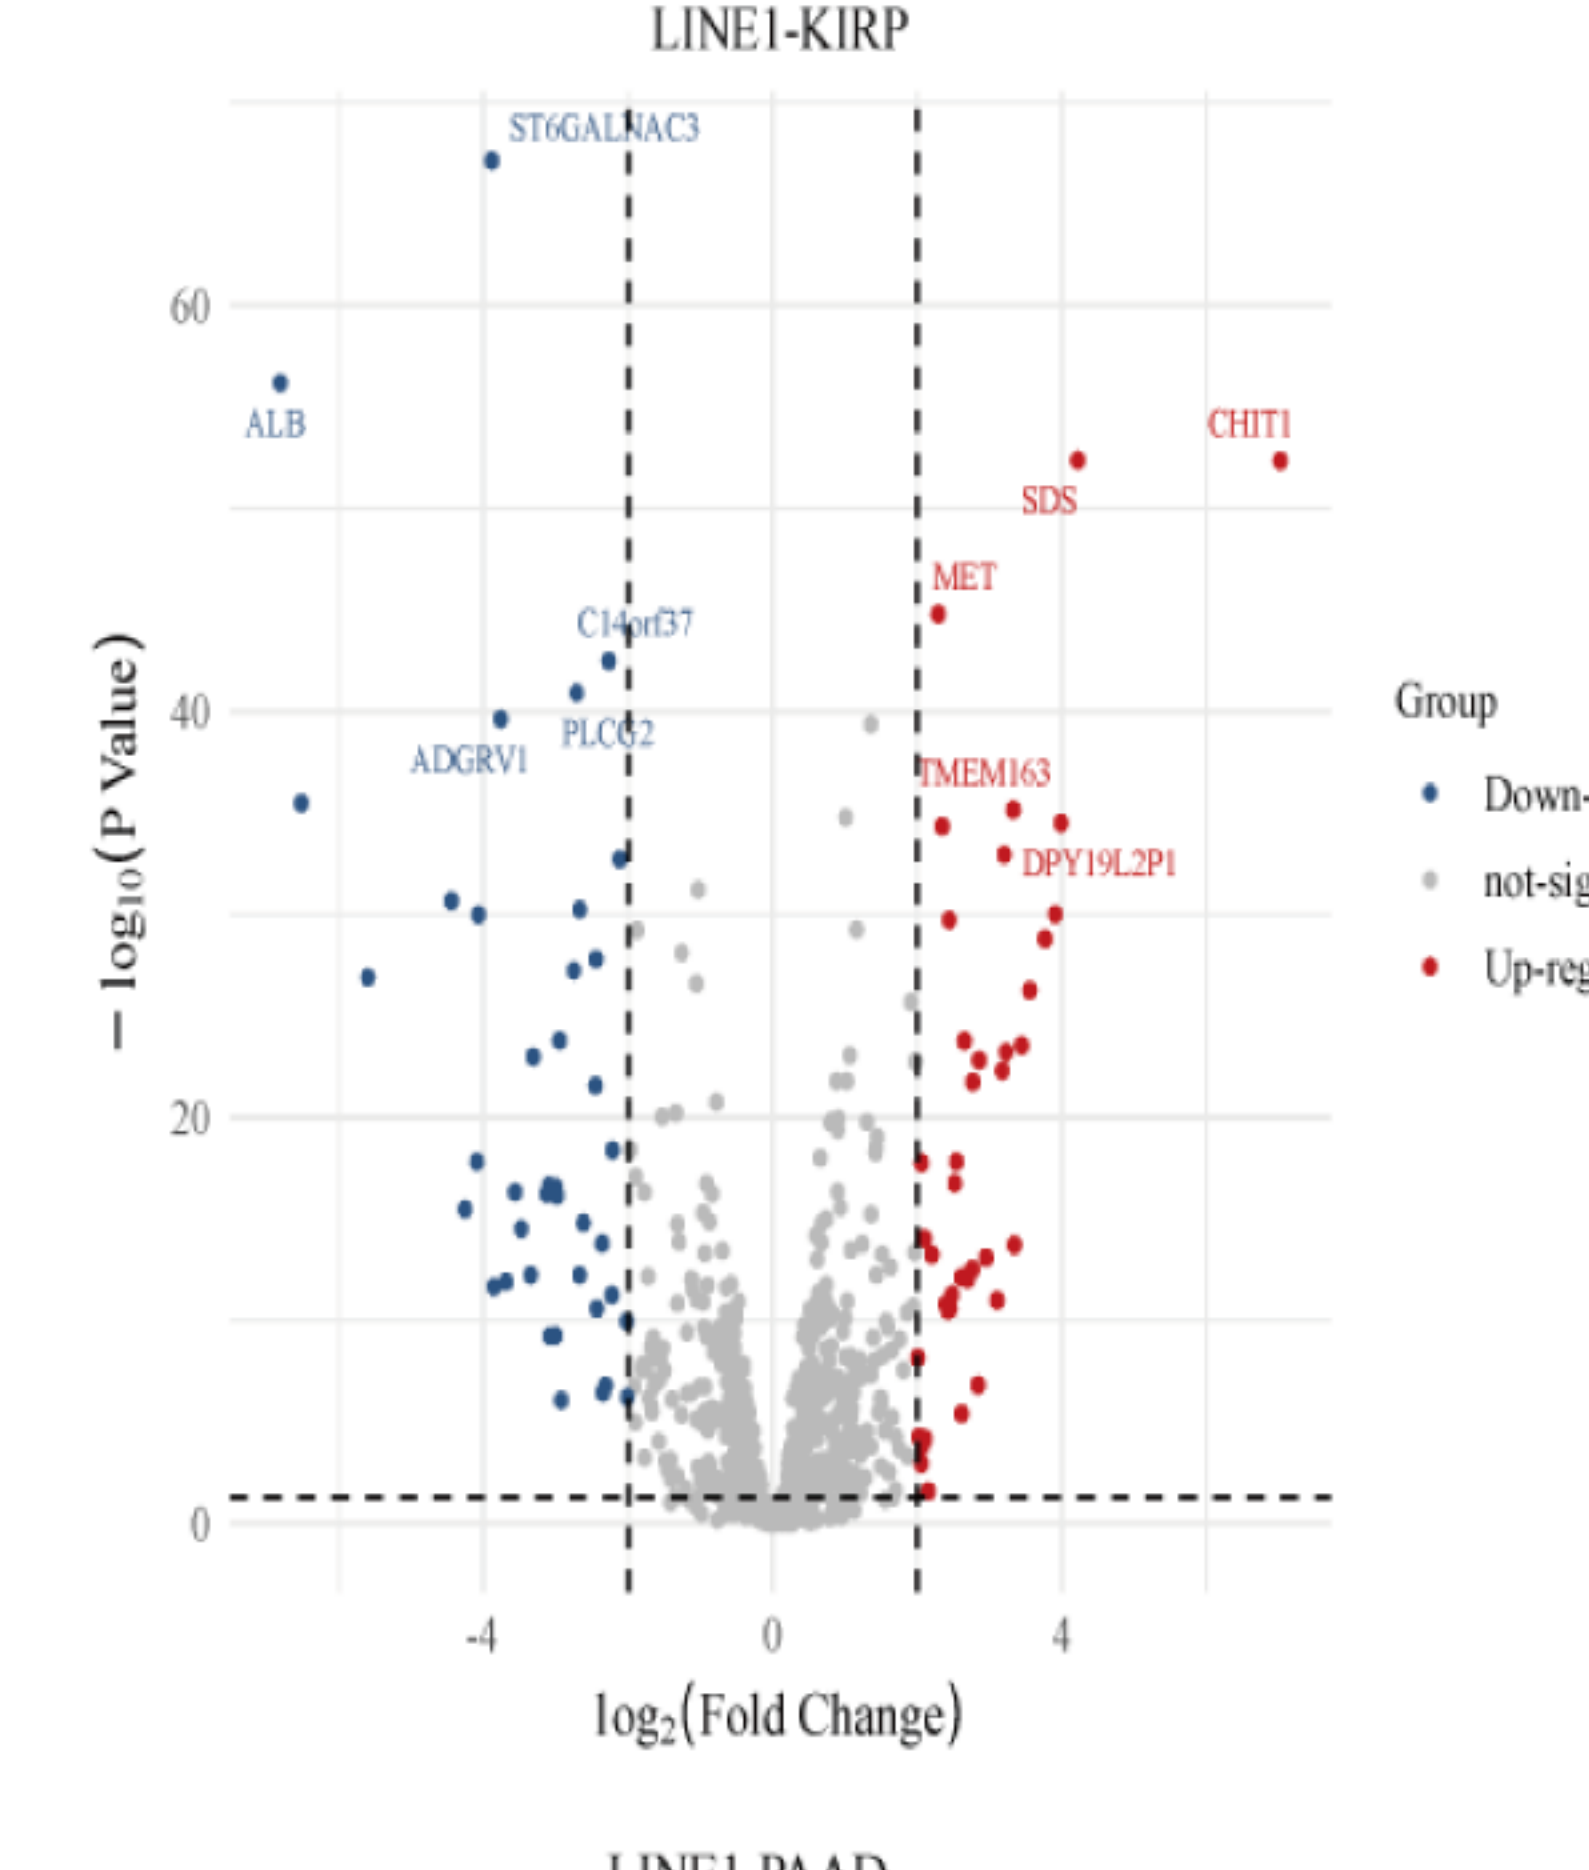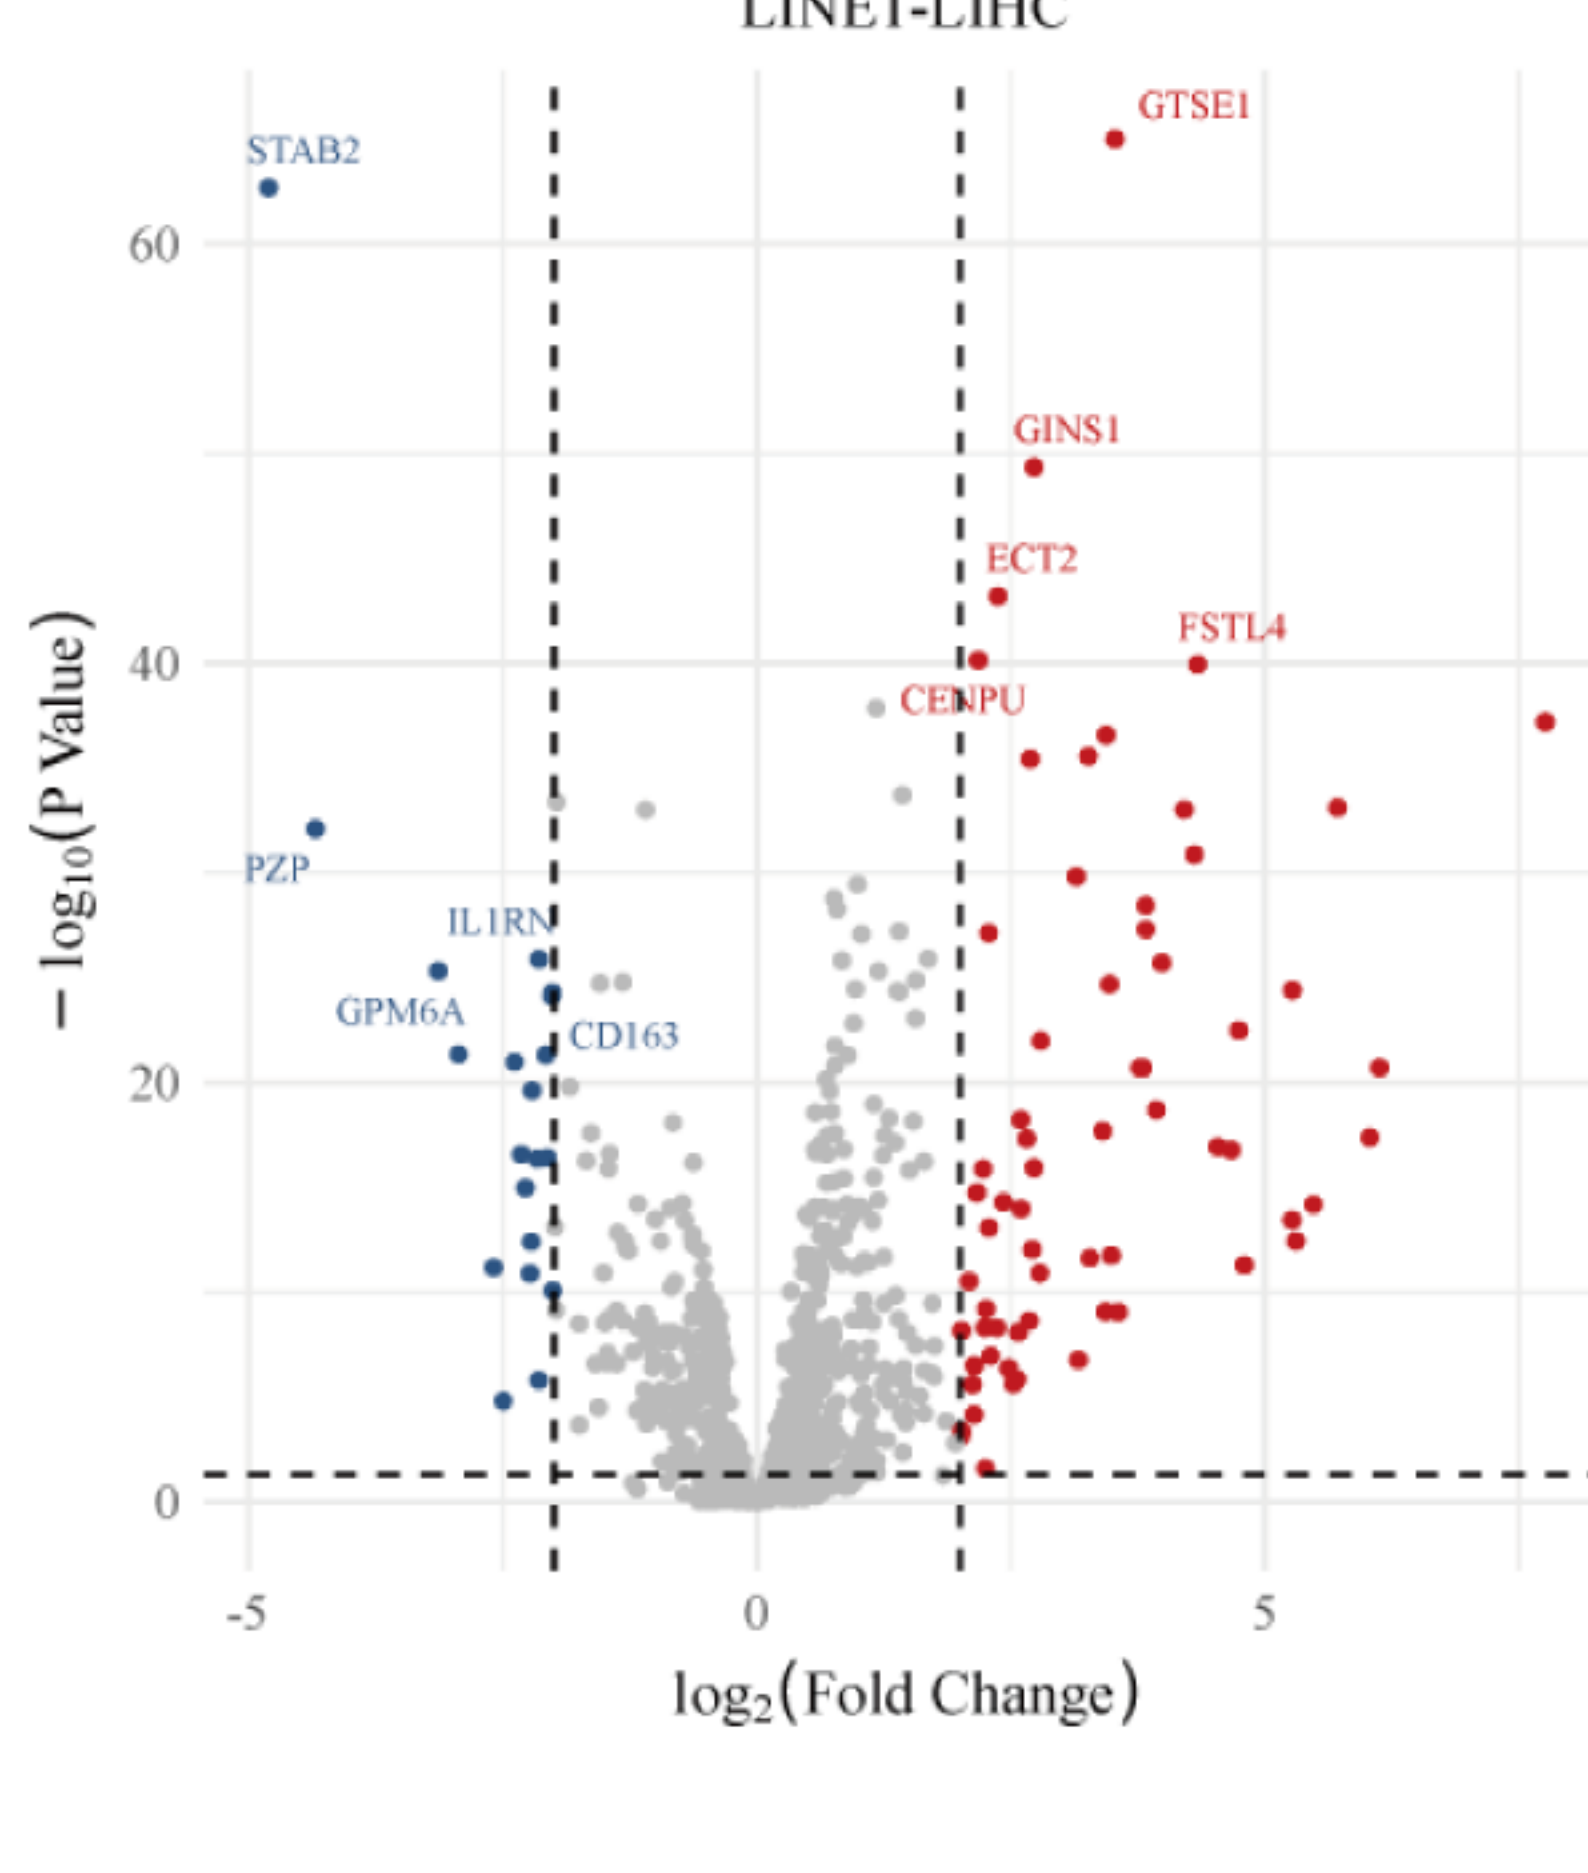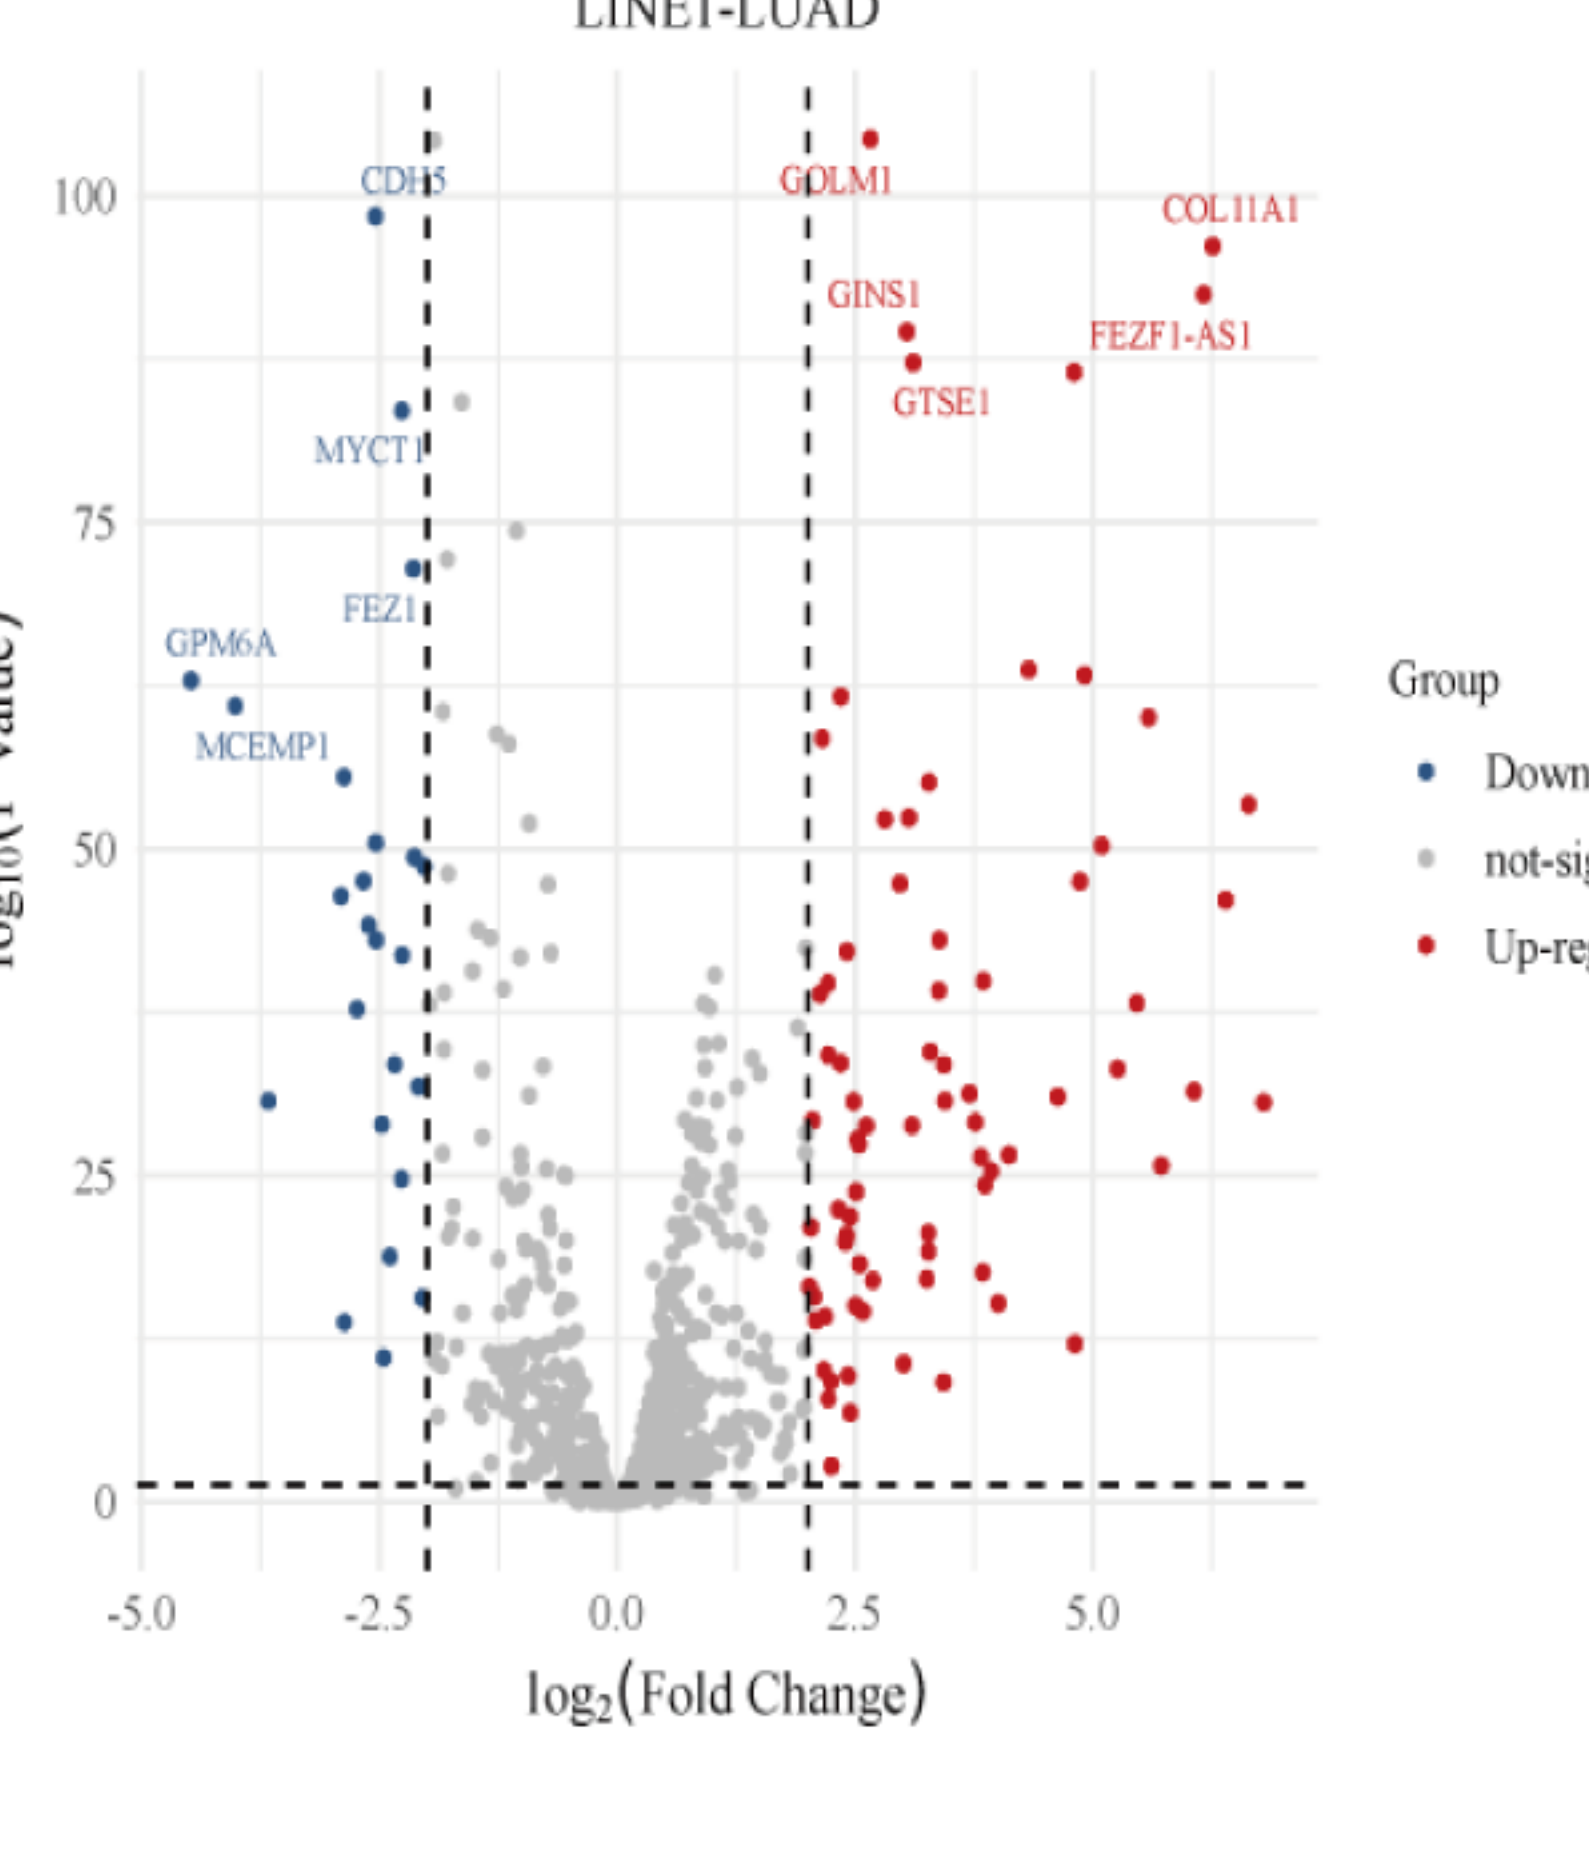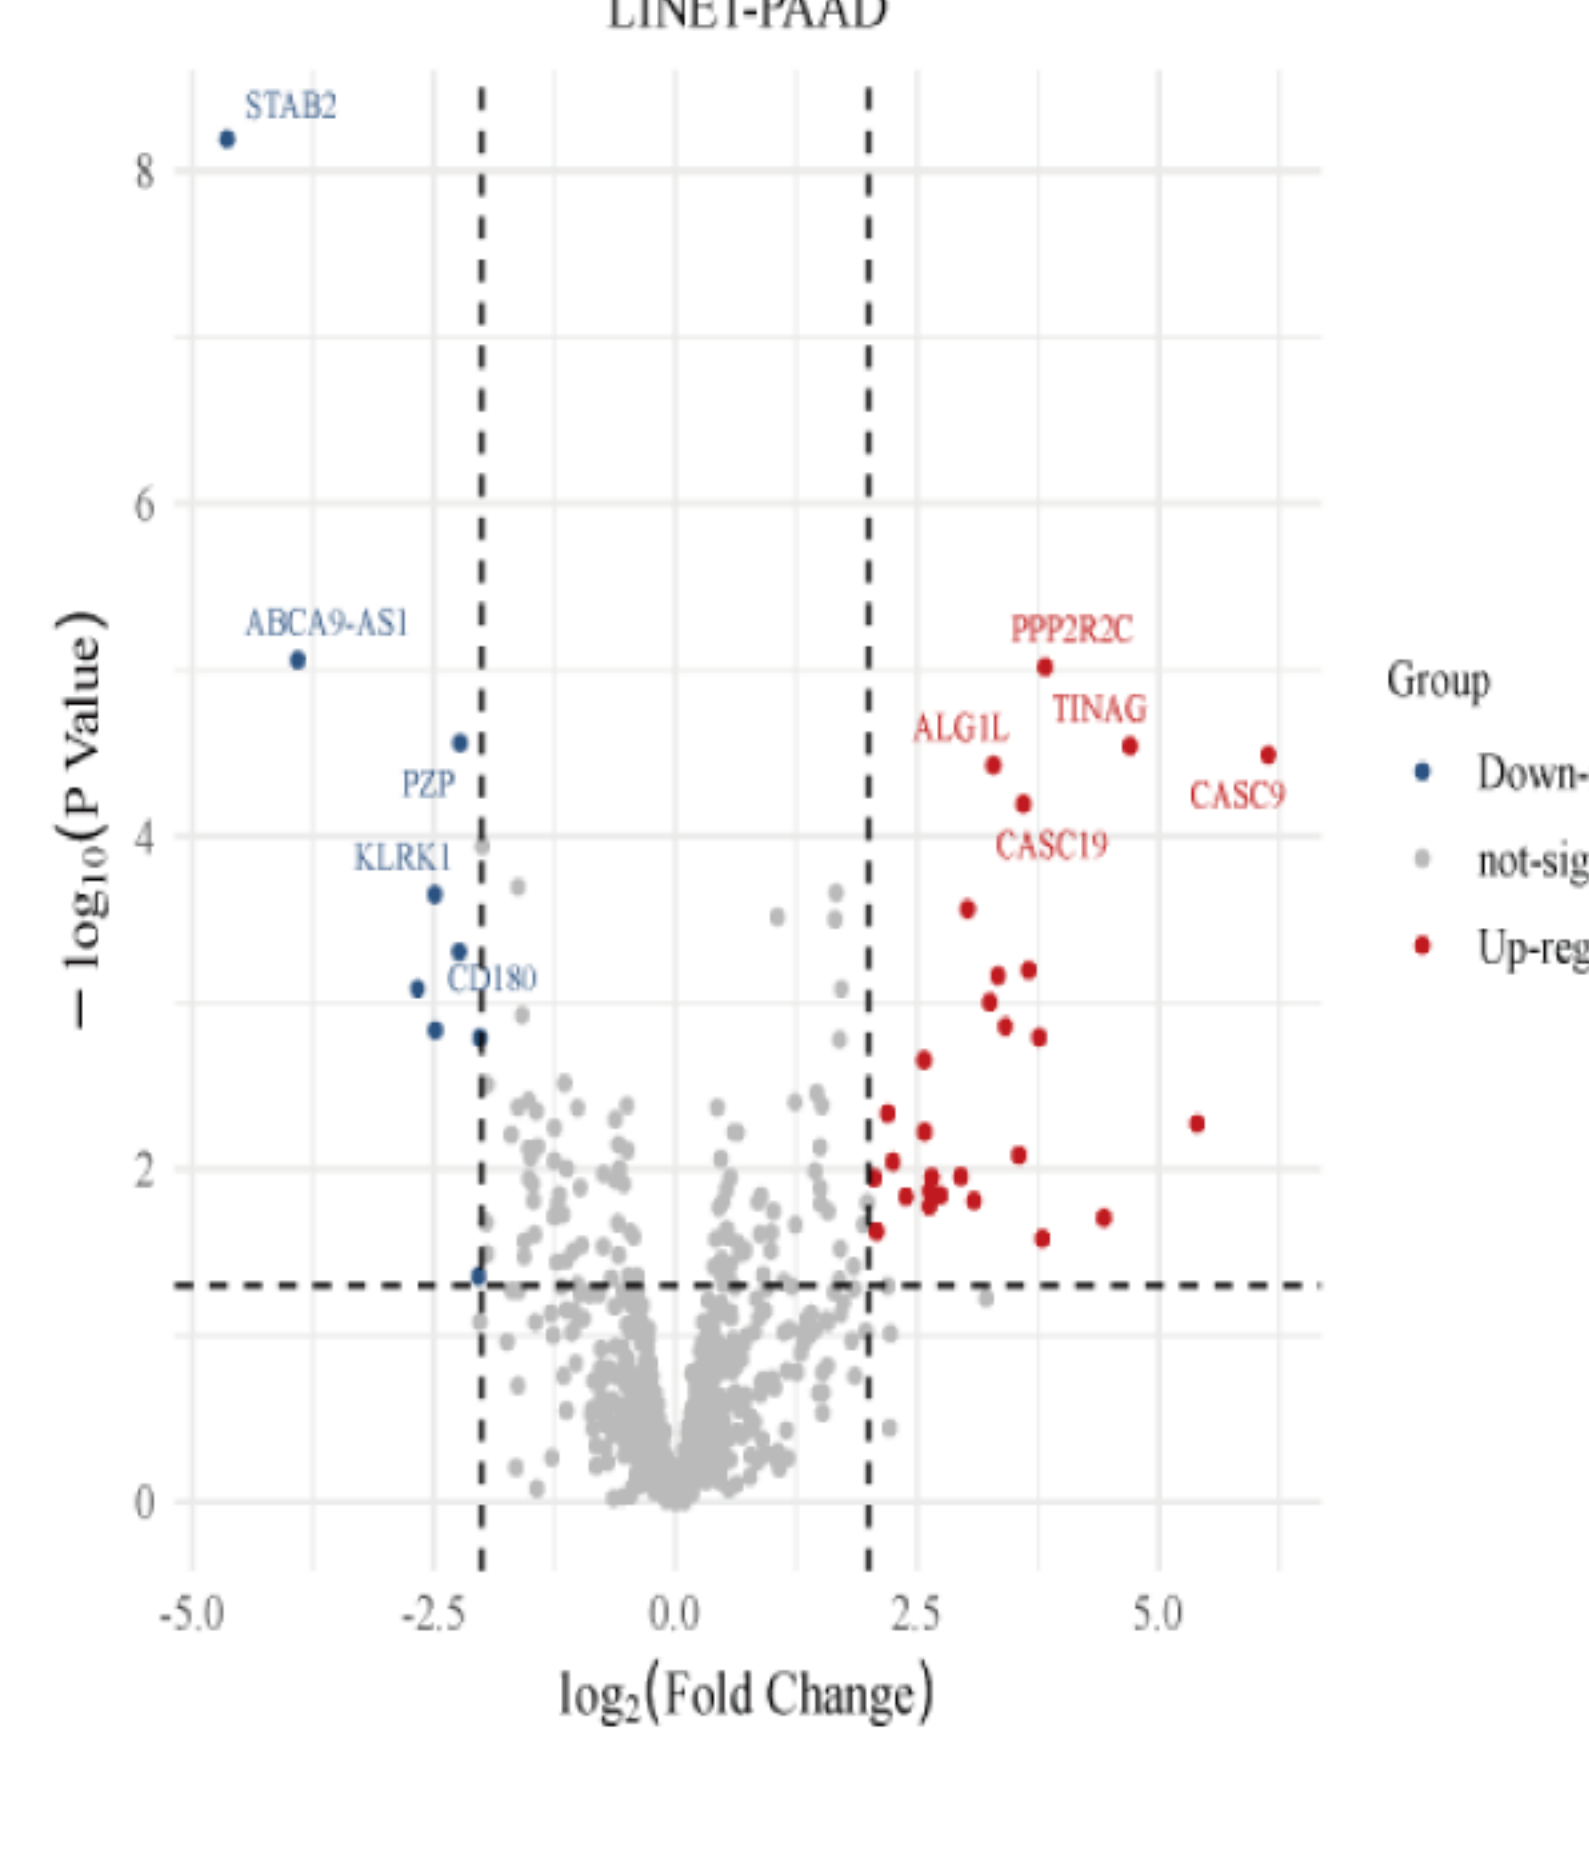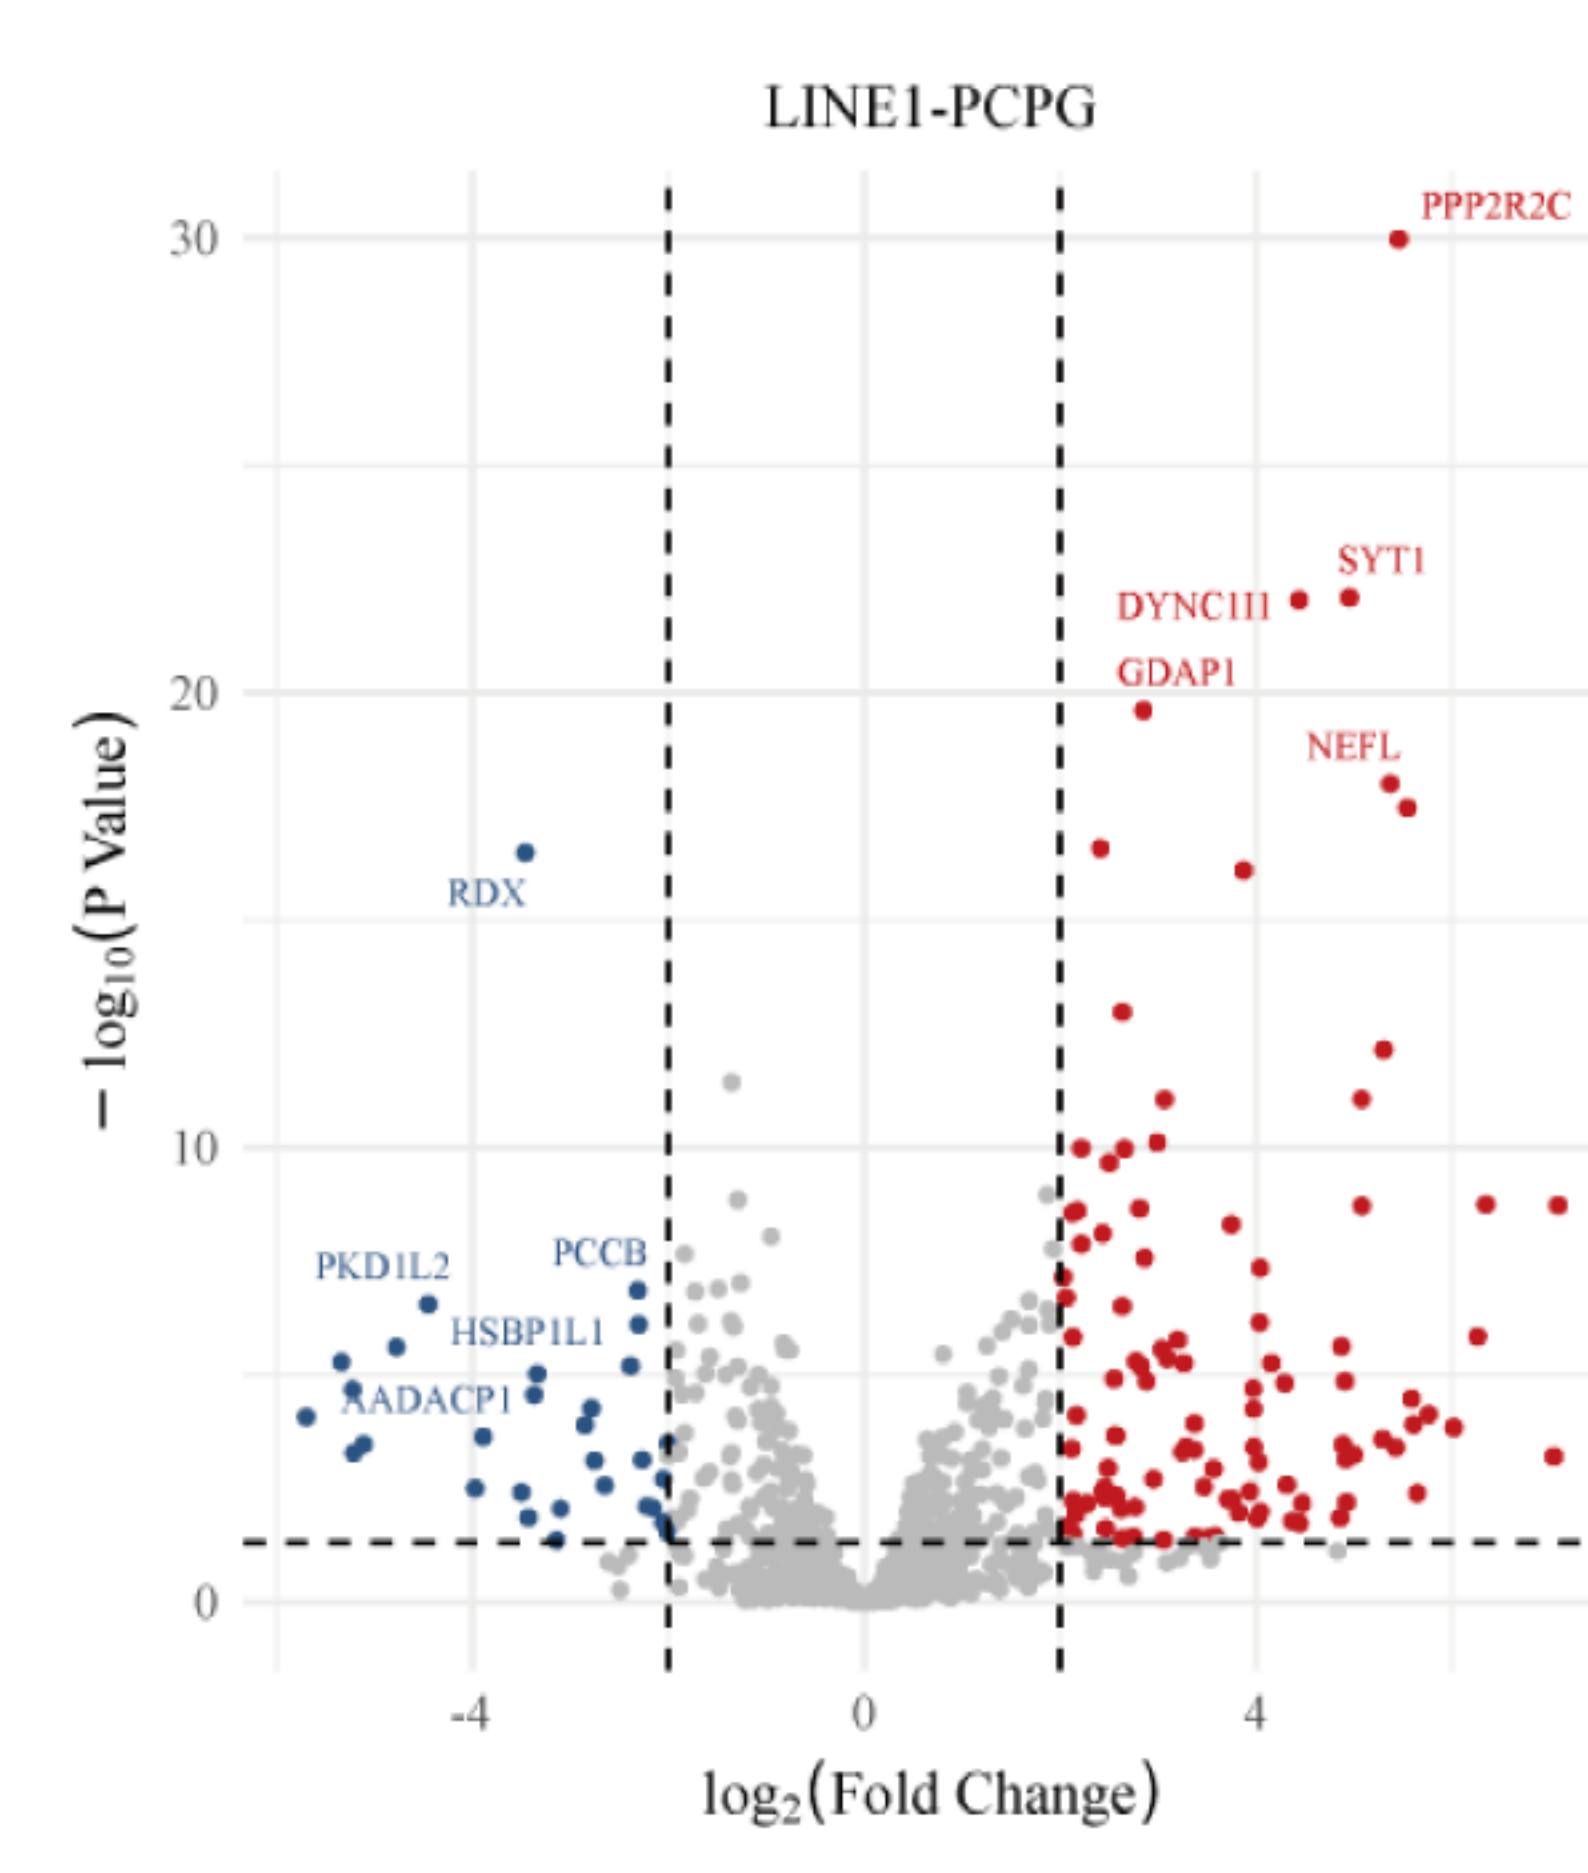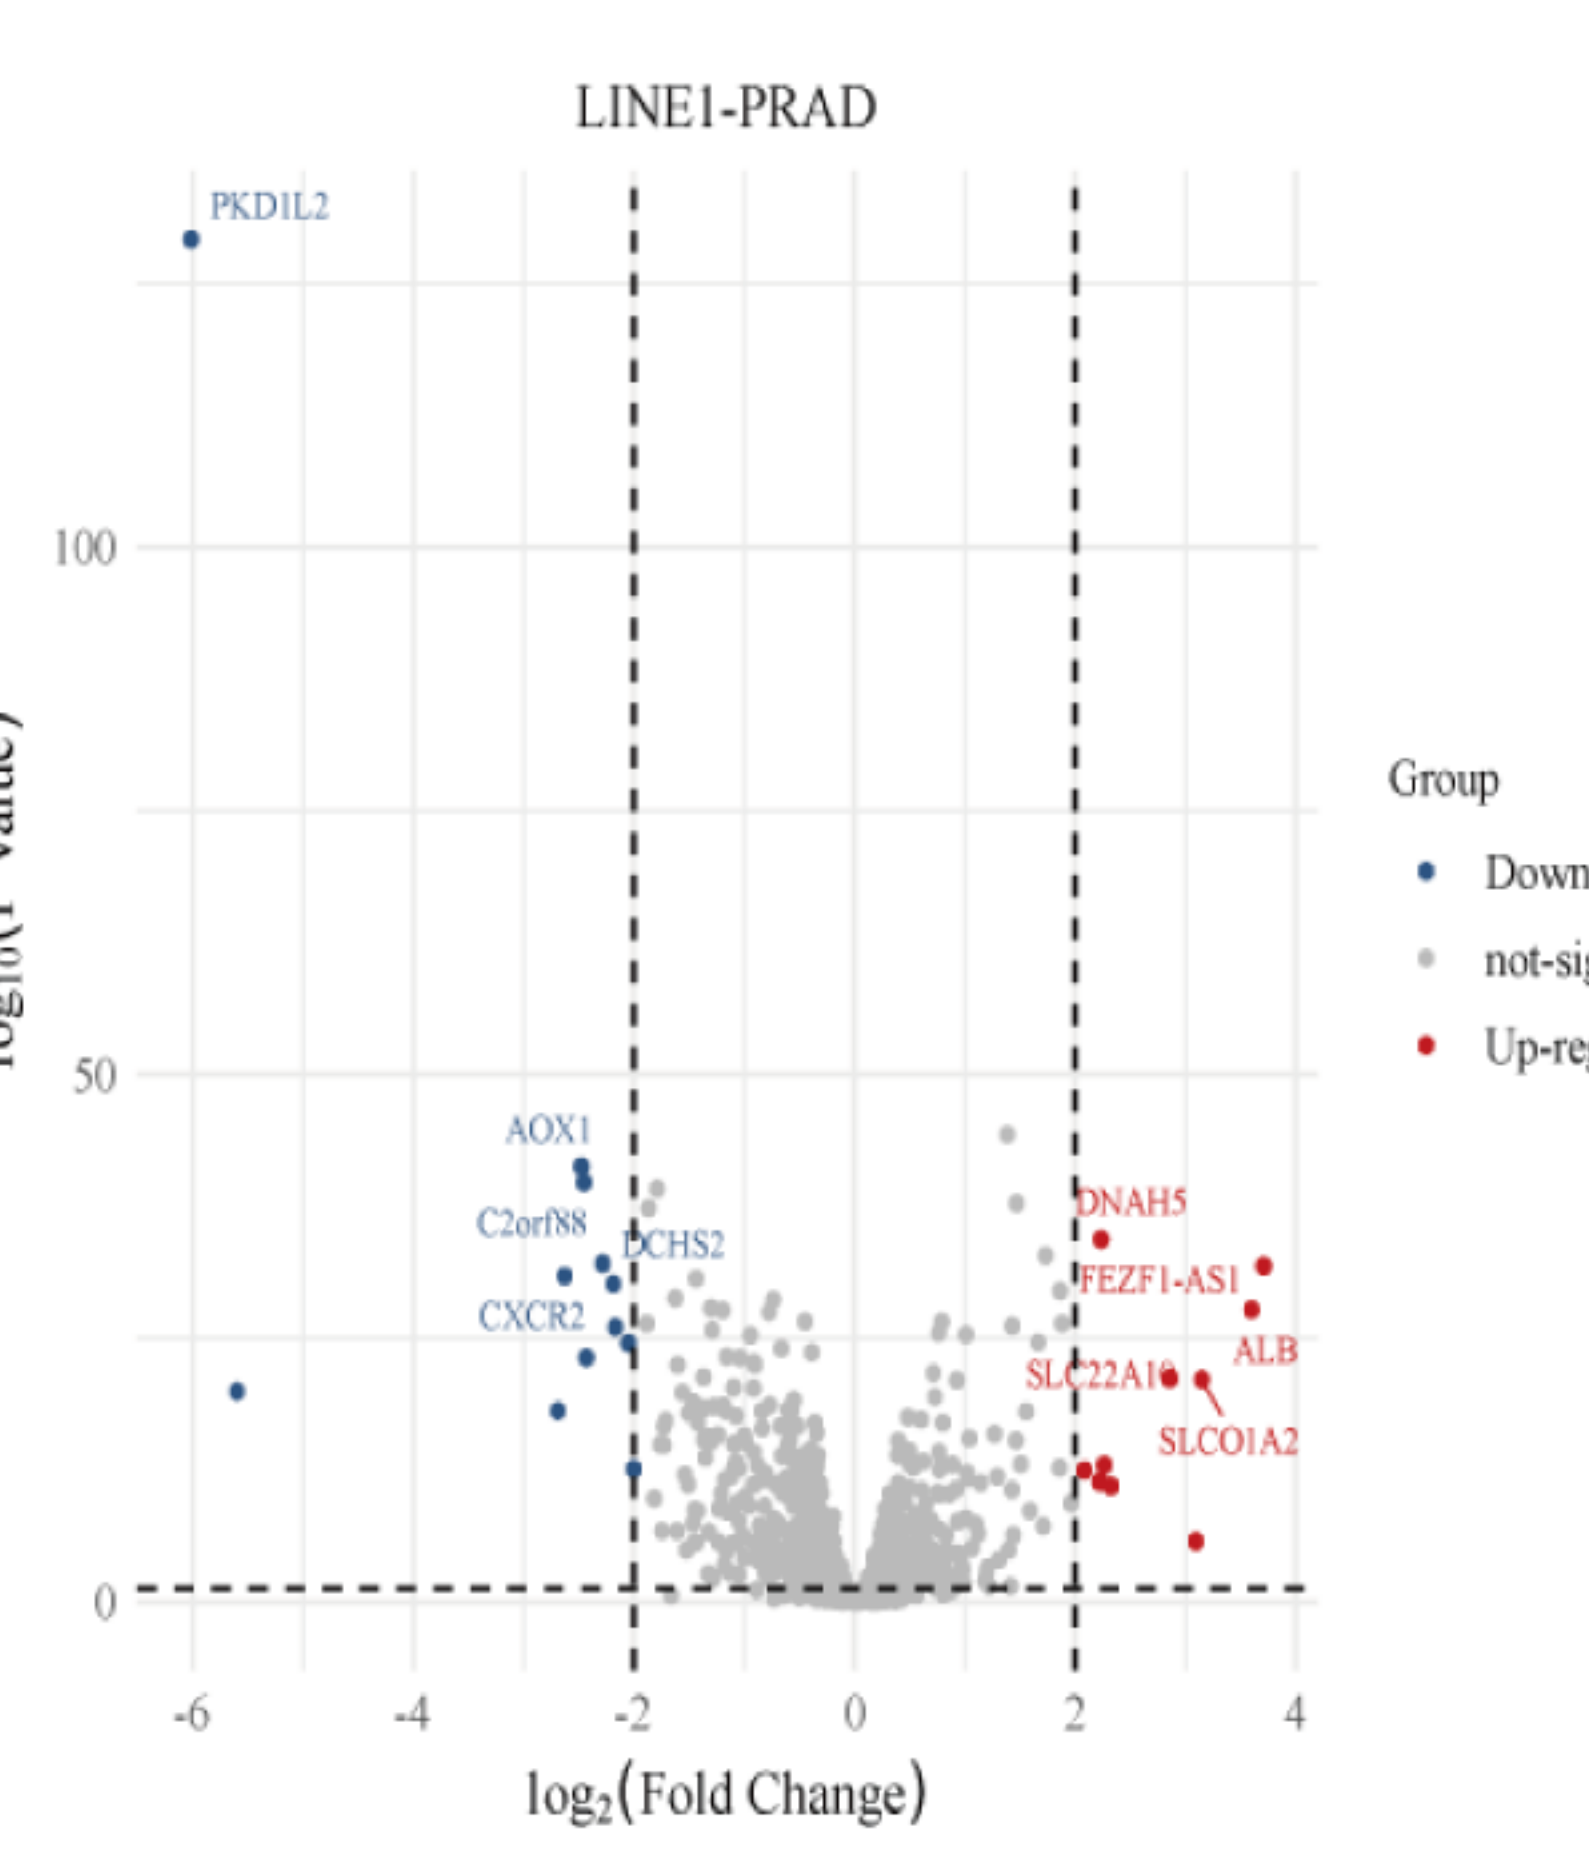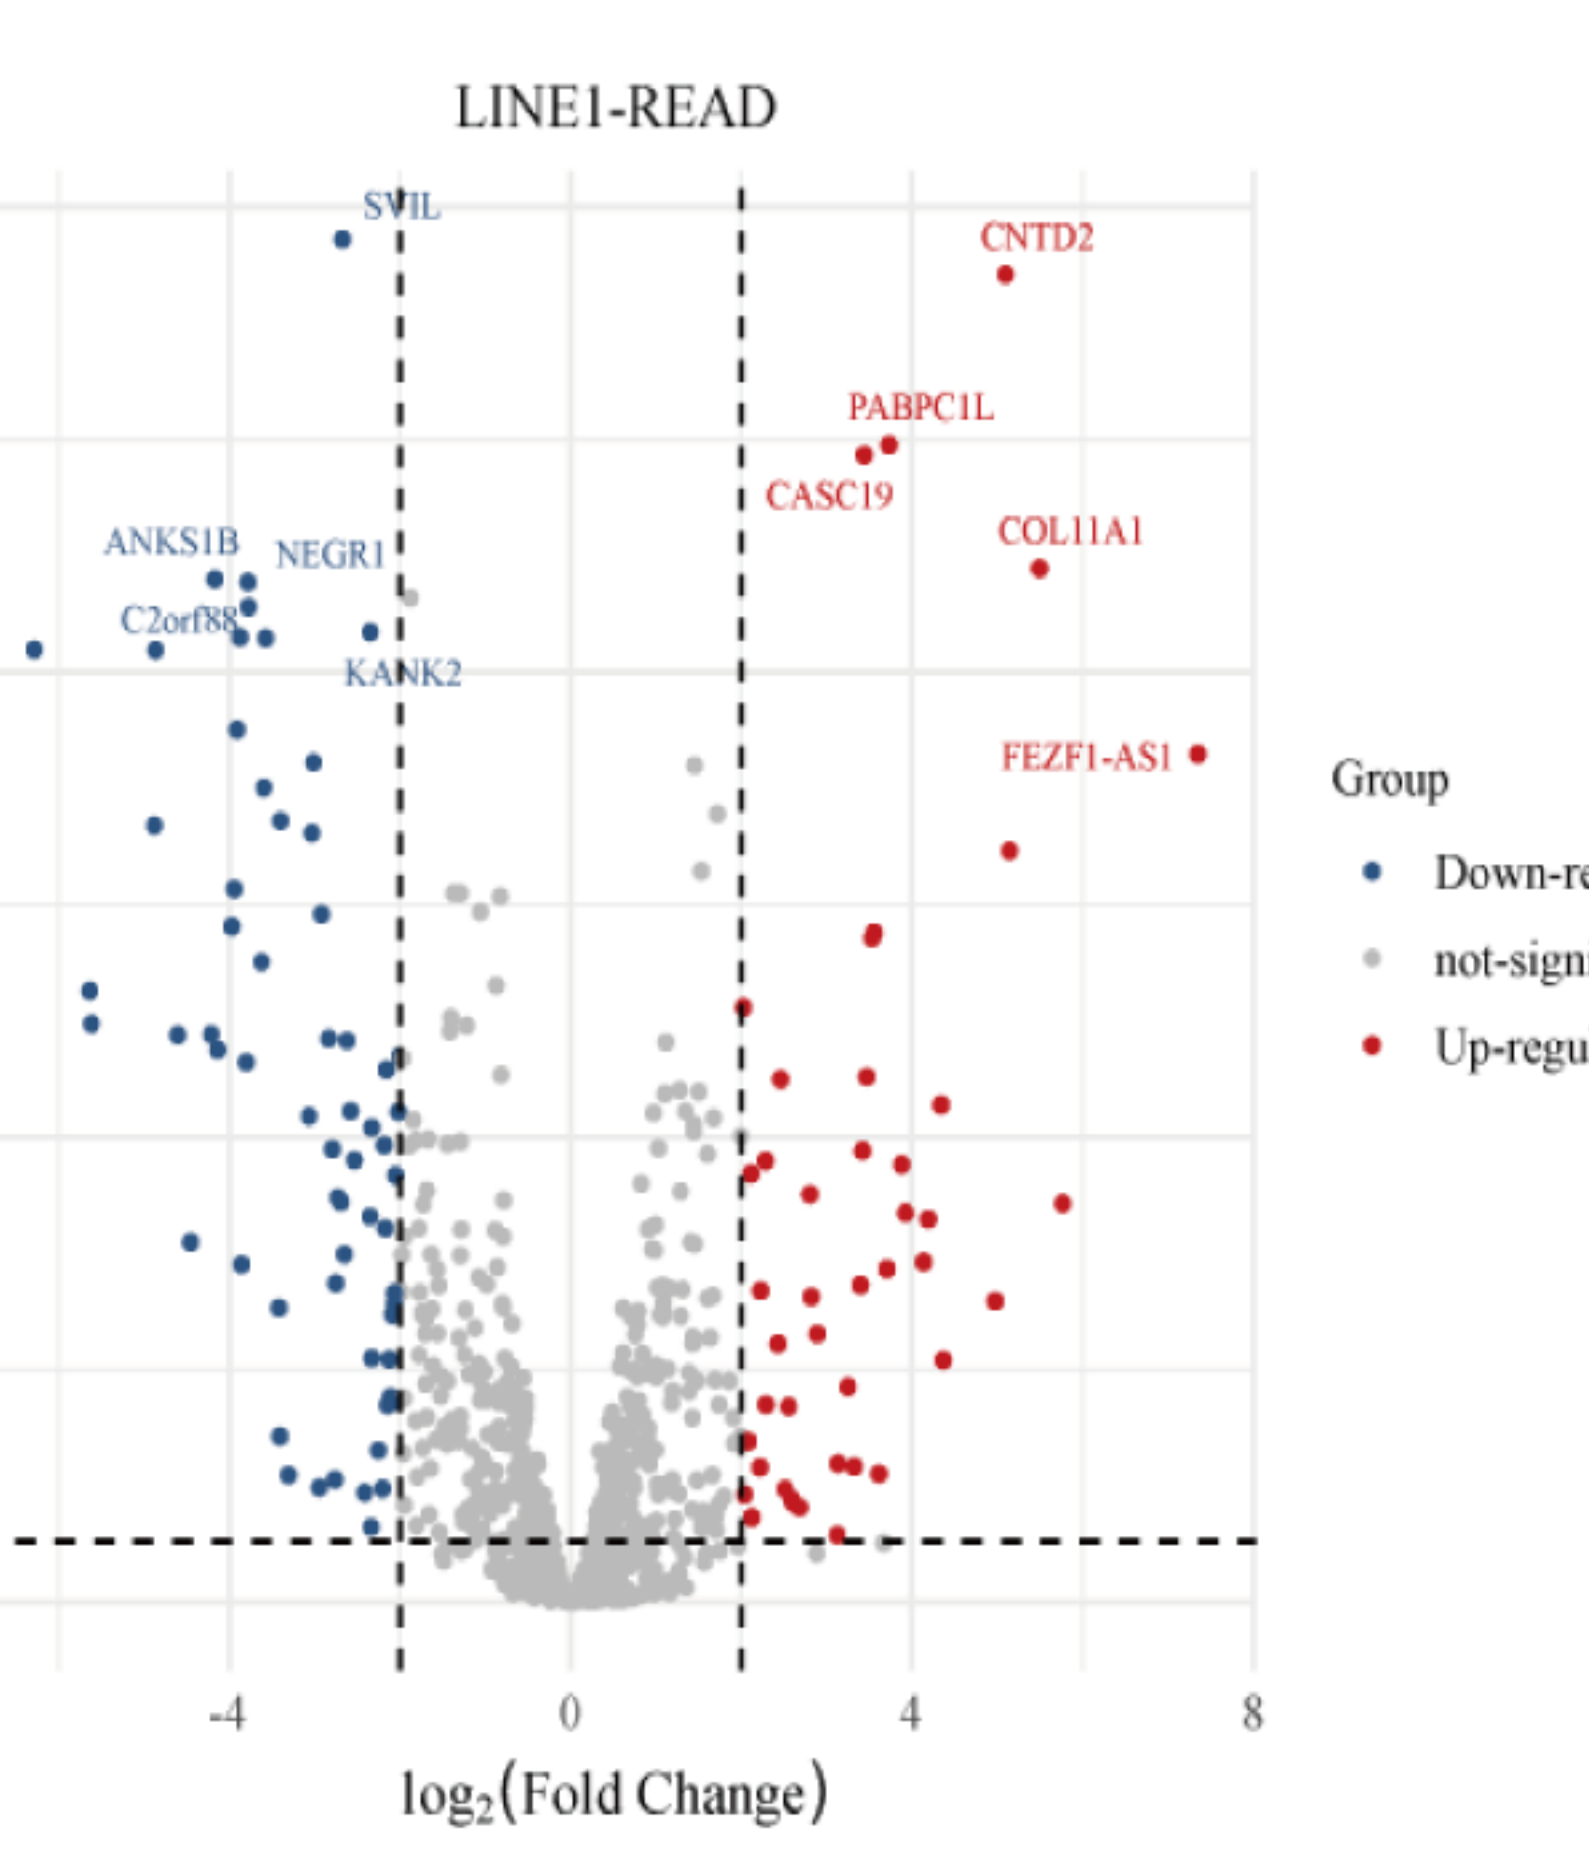

2



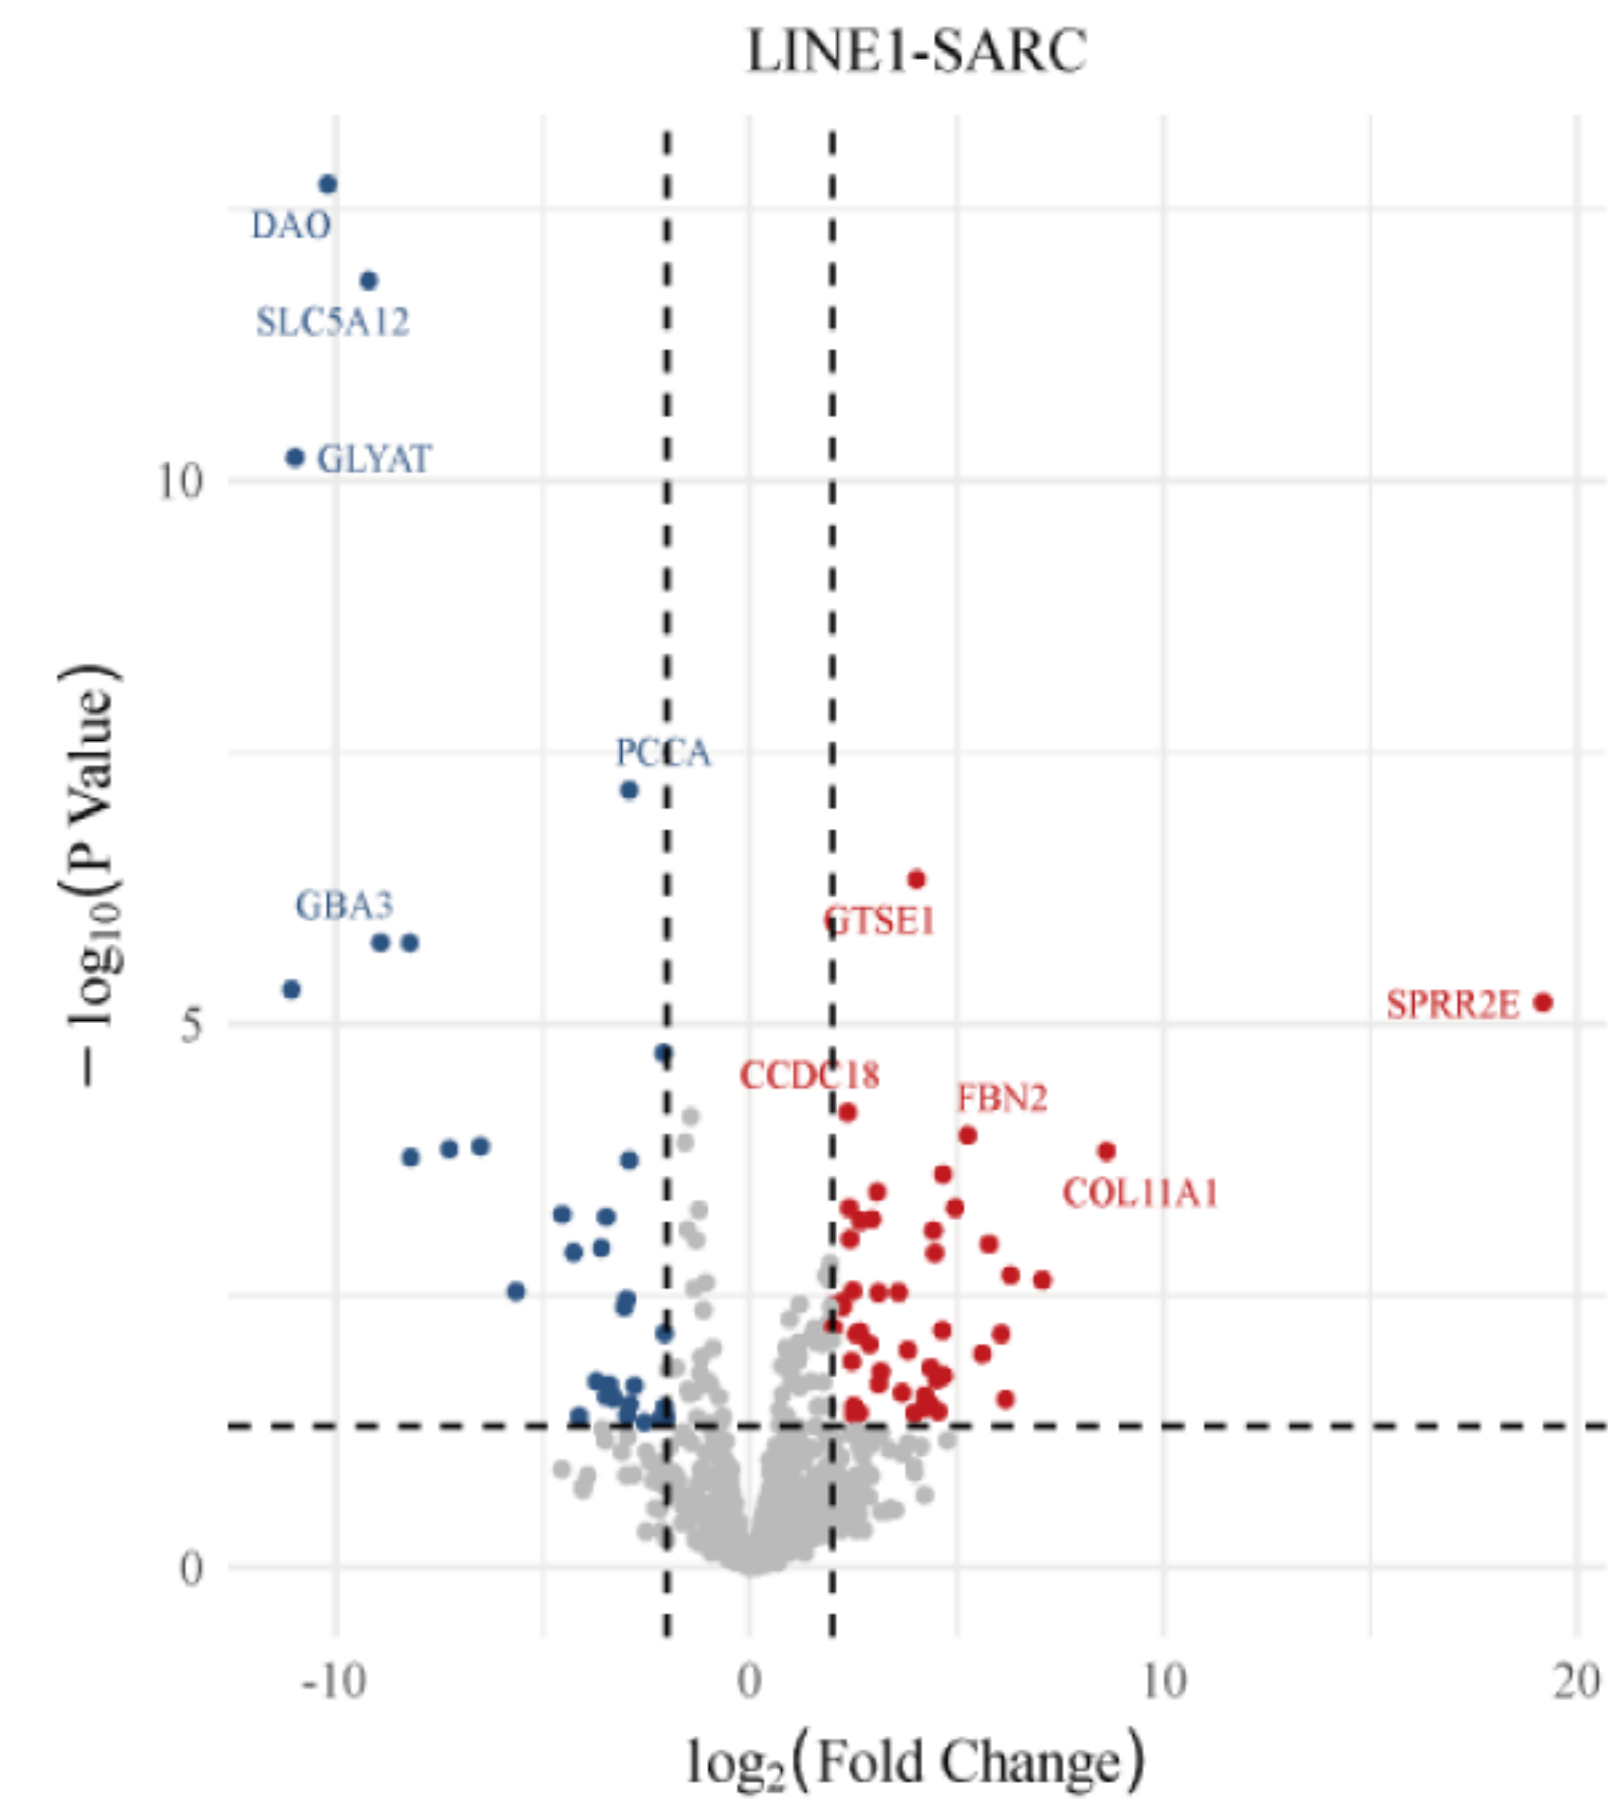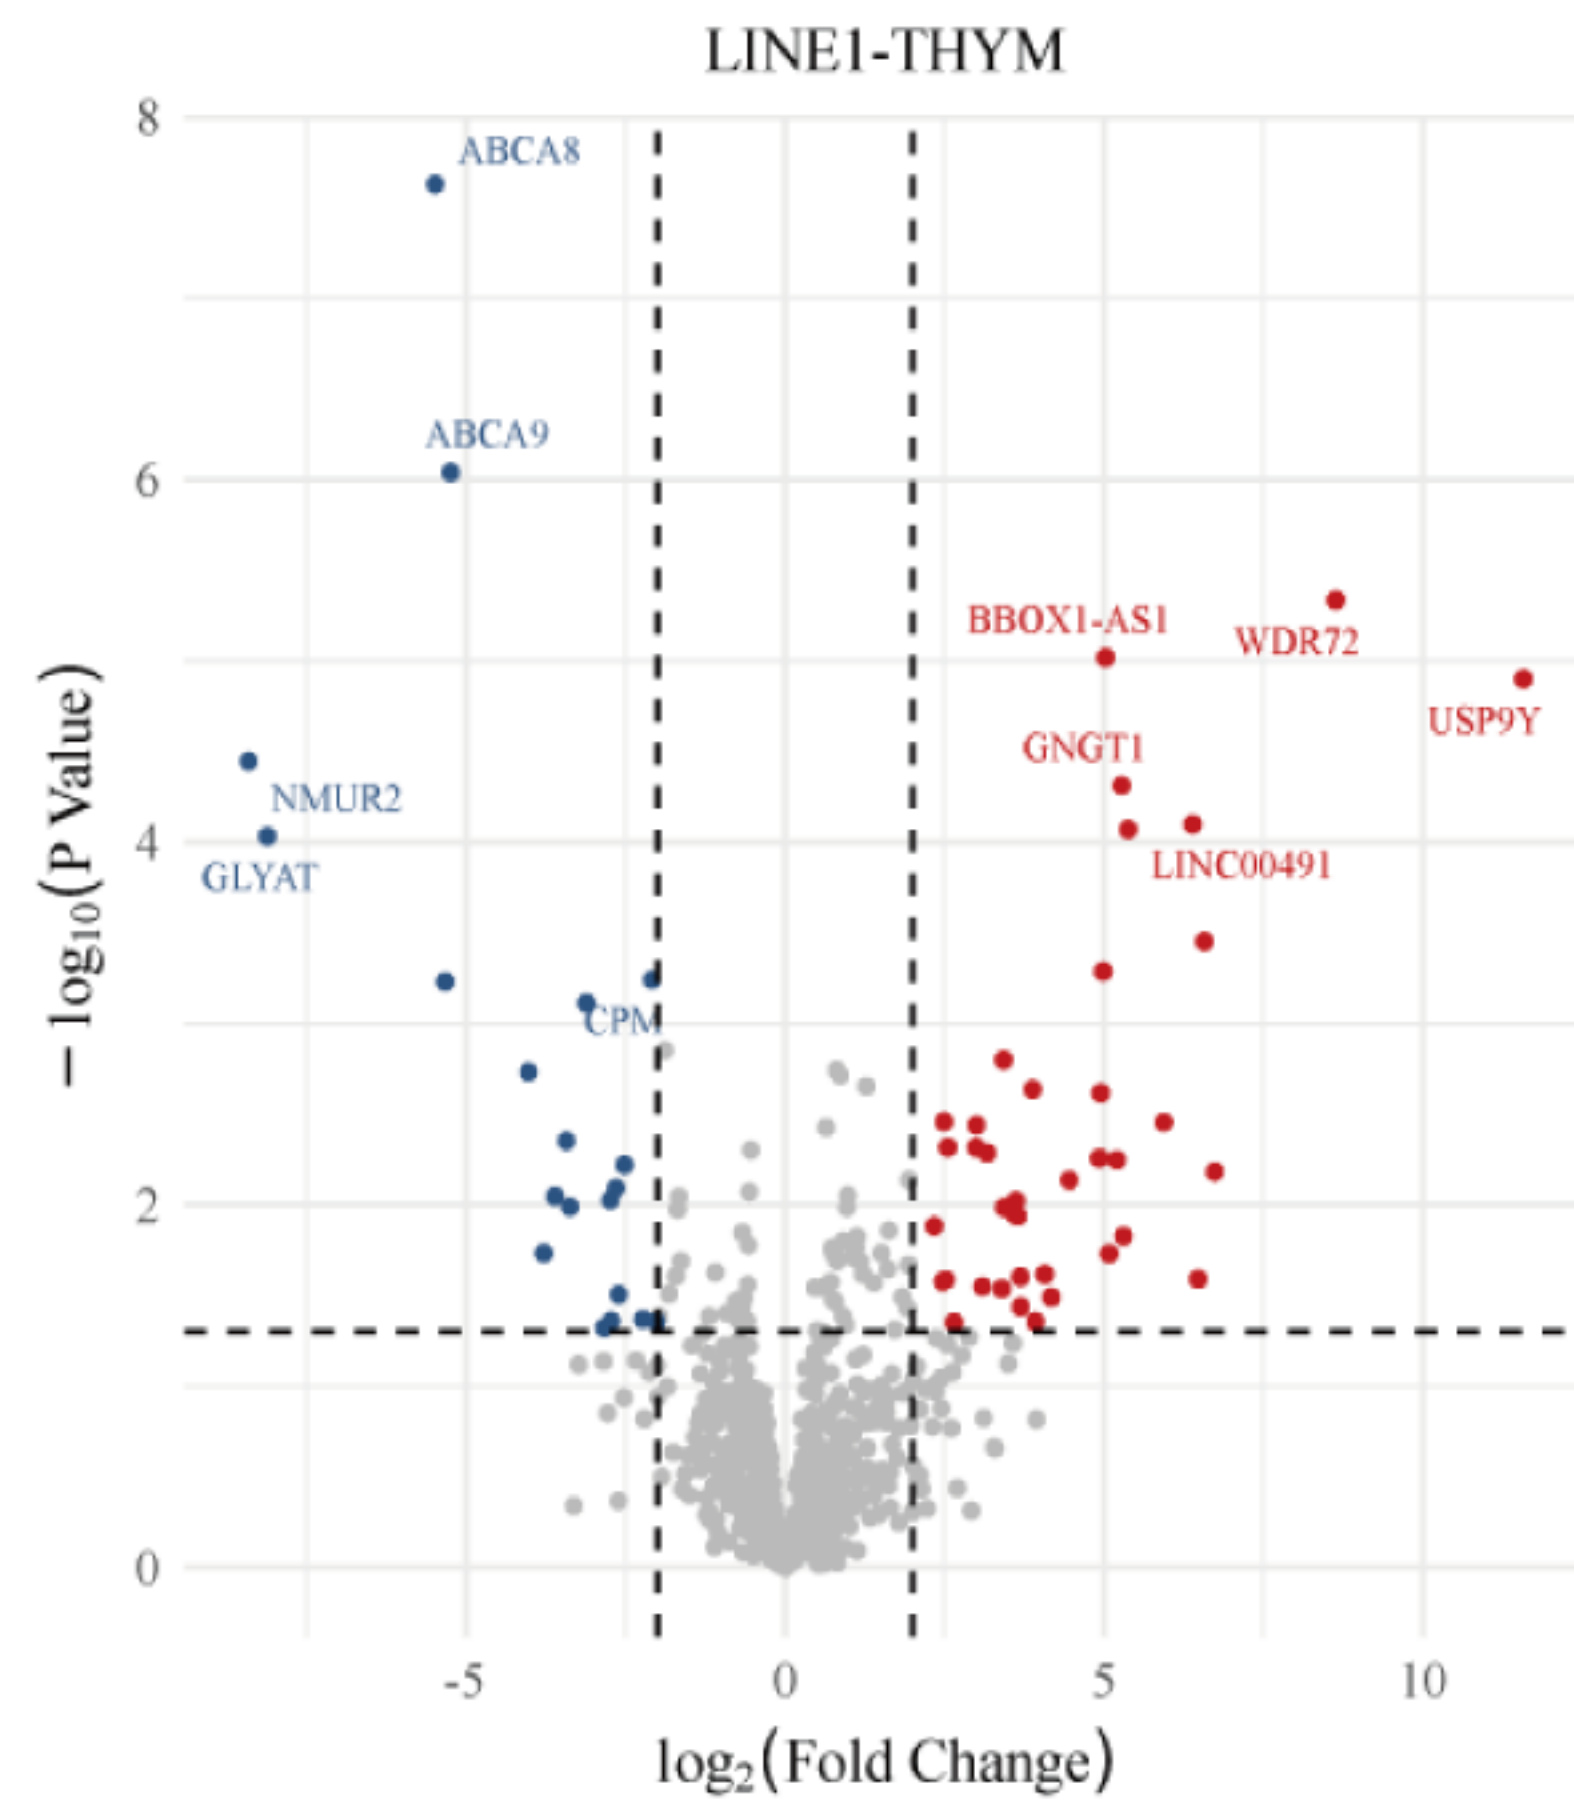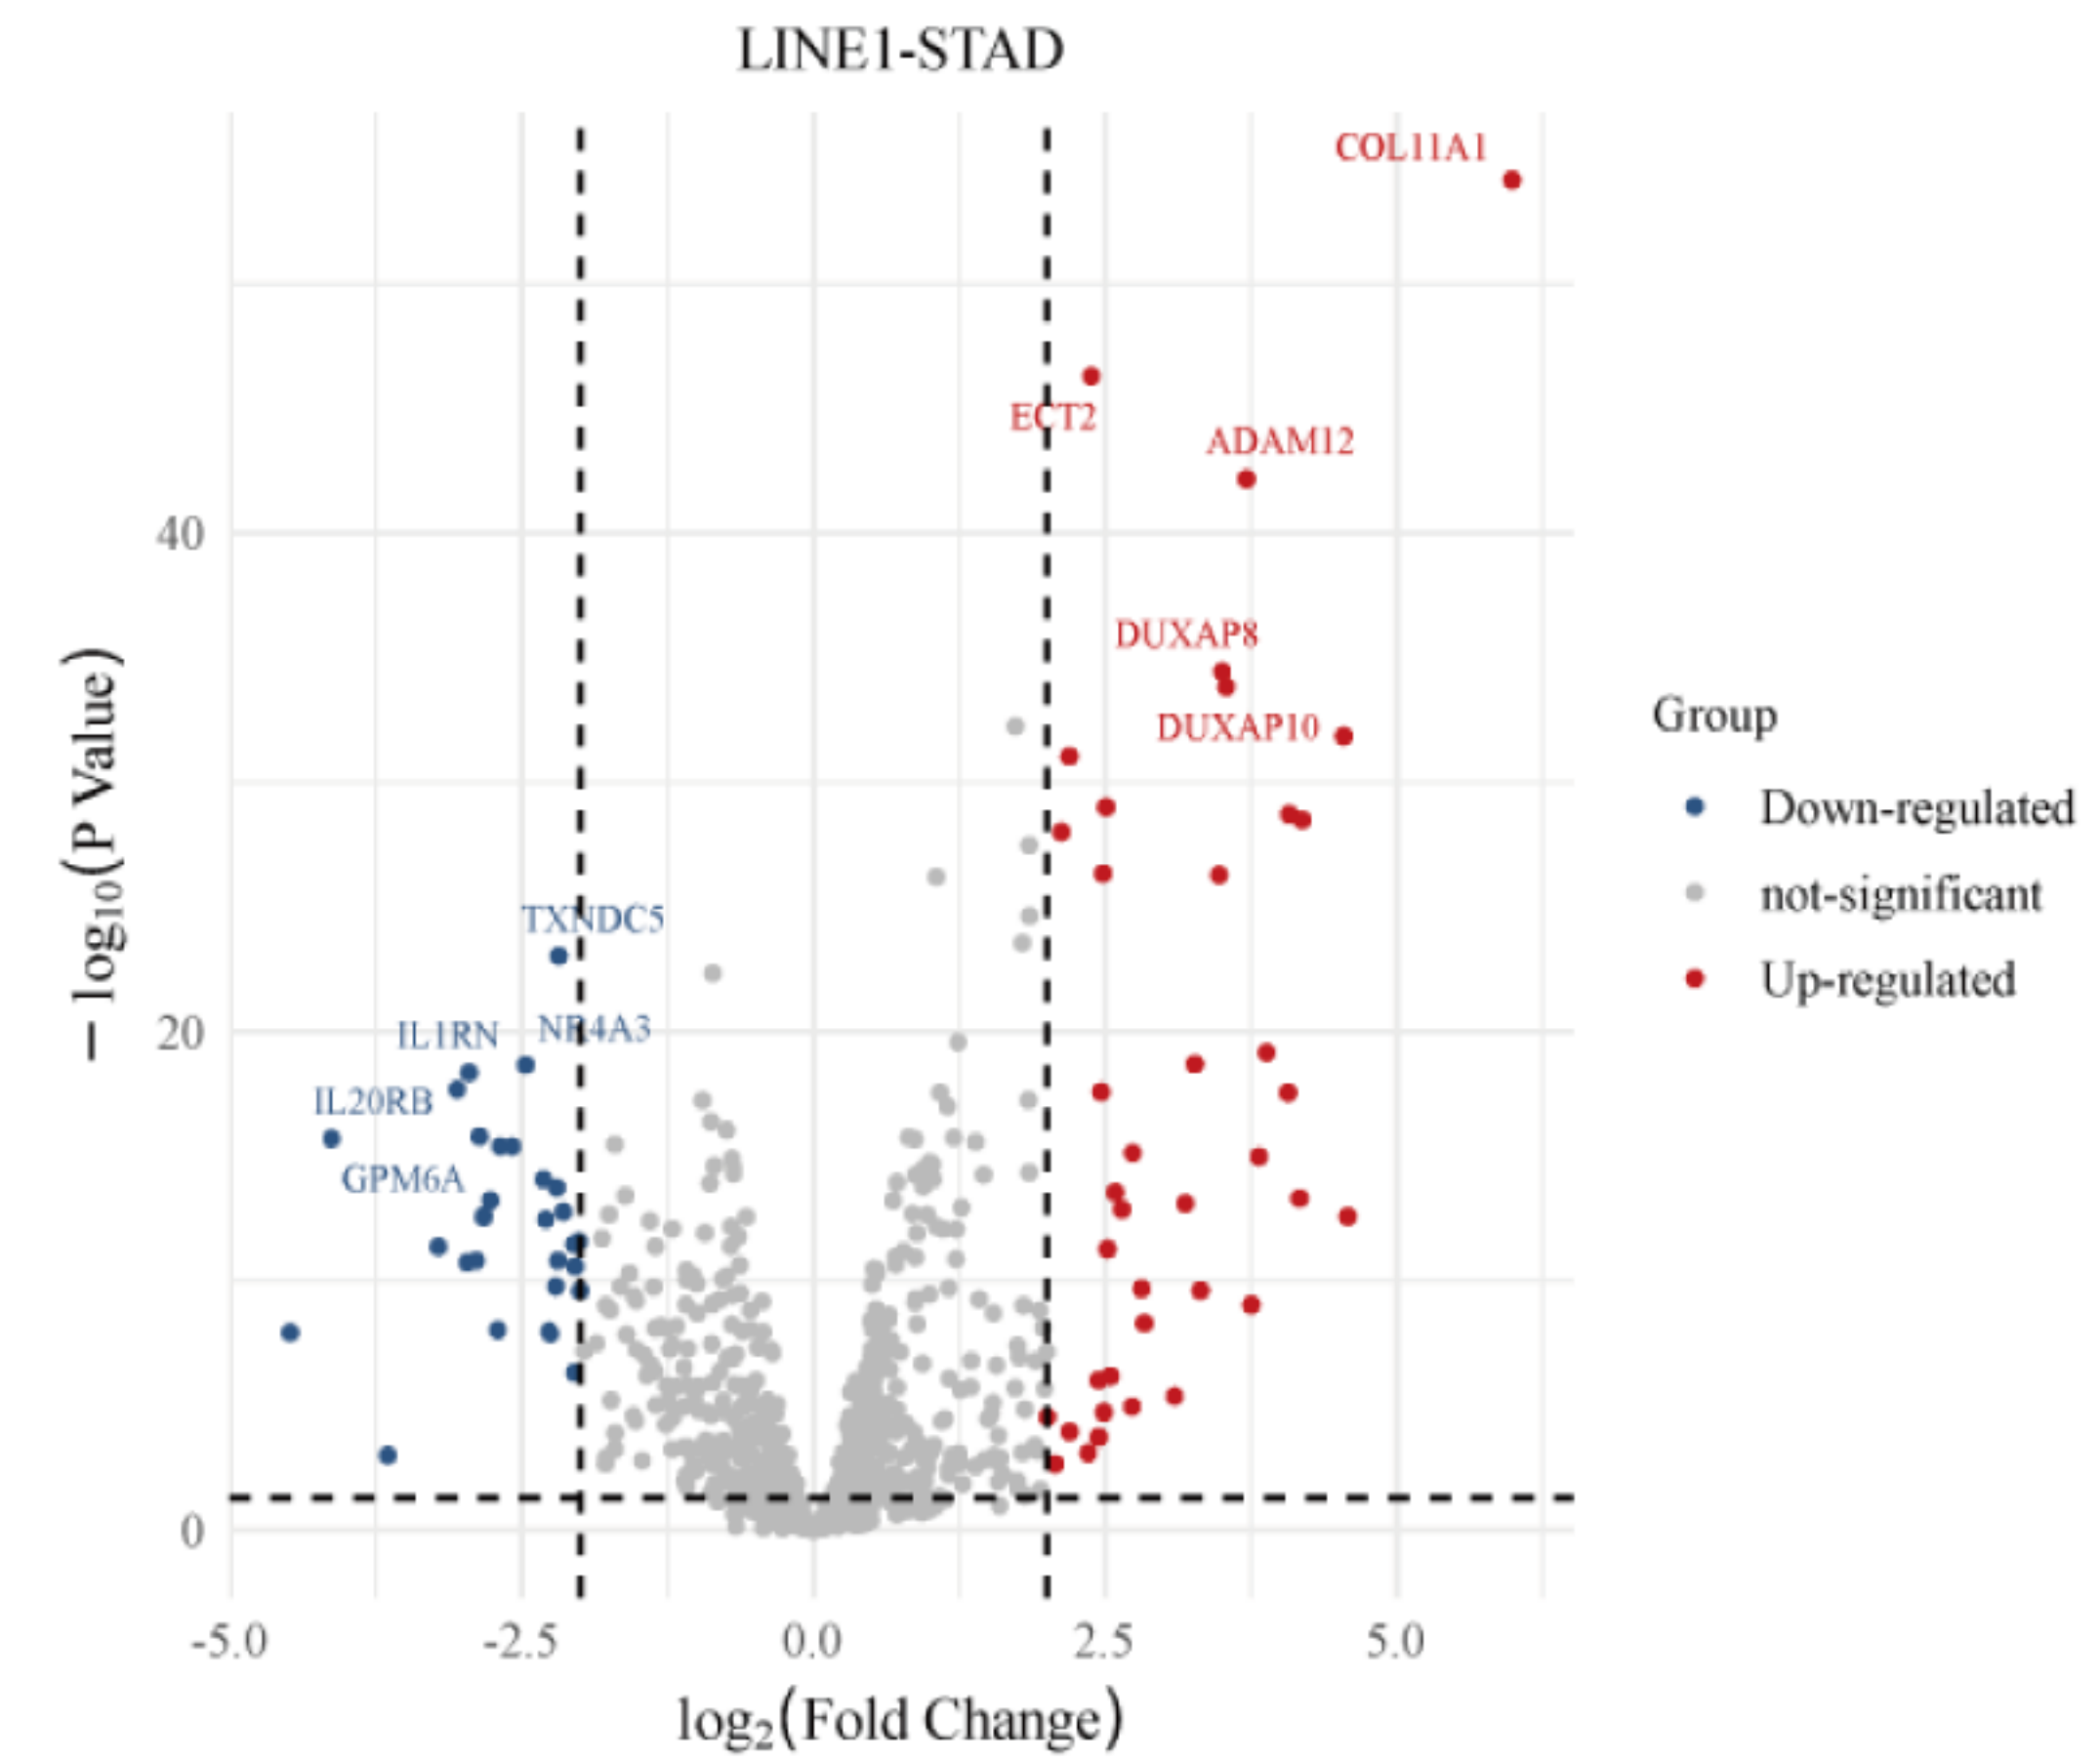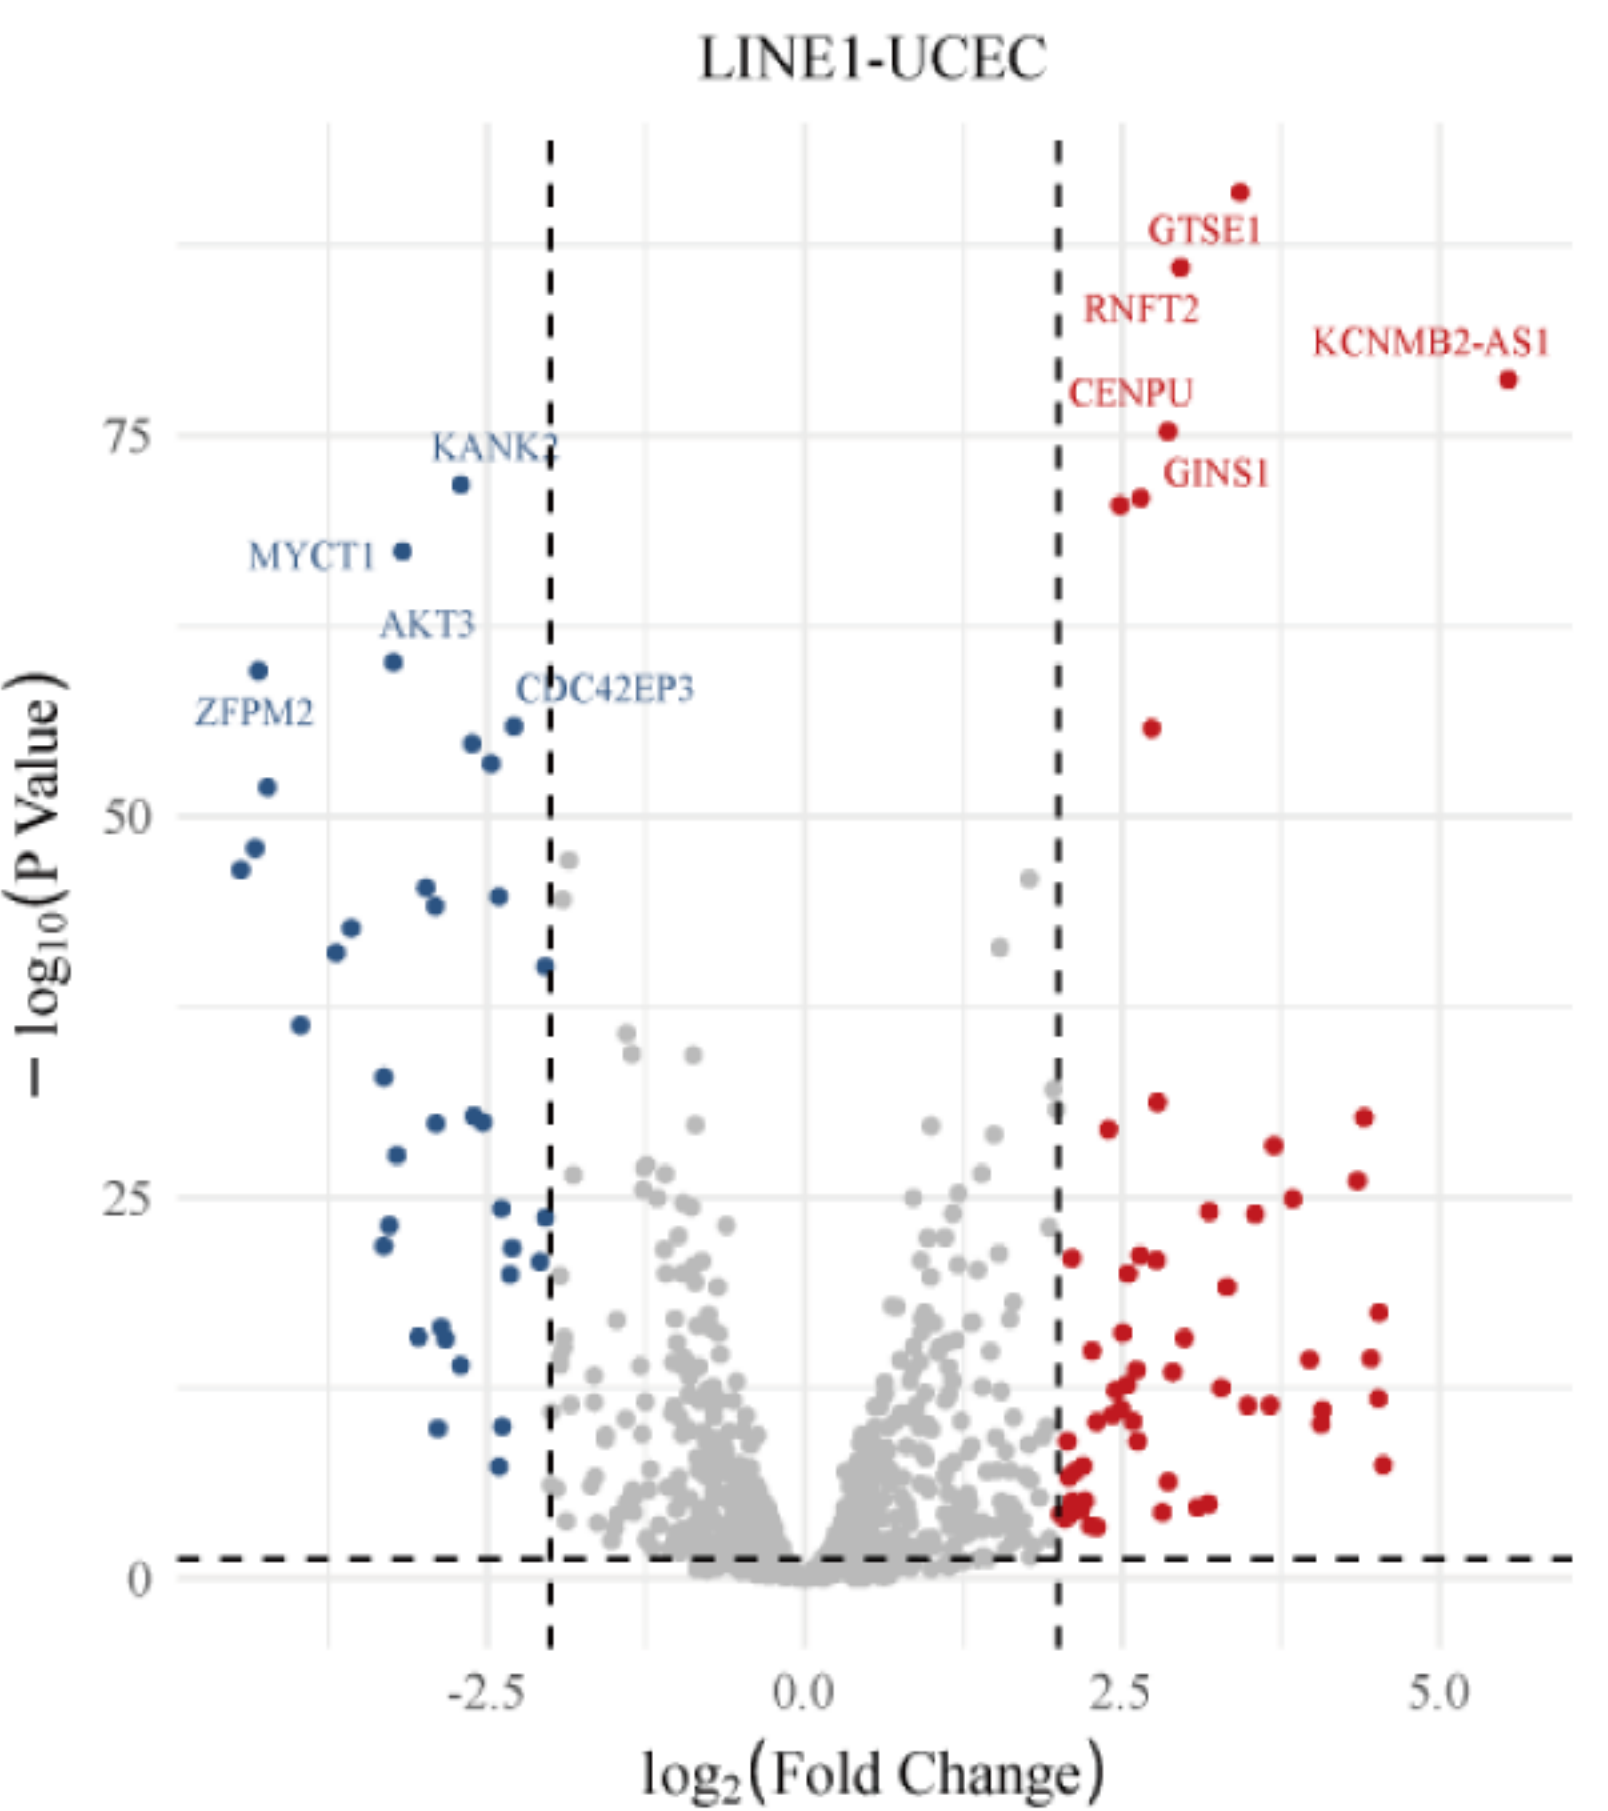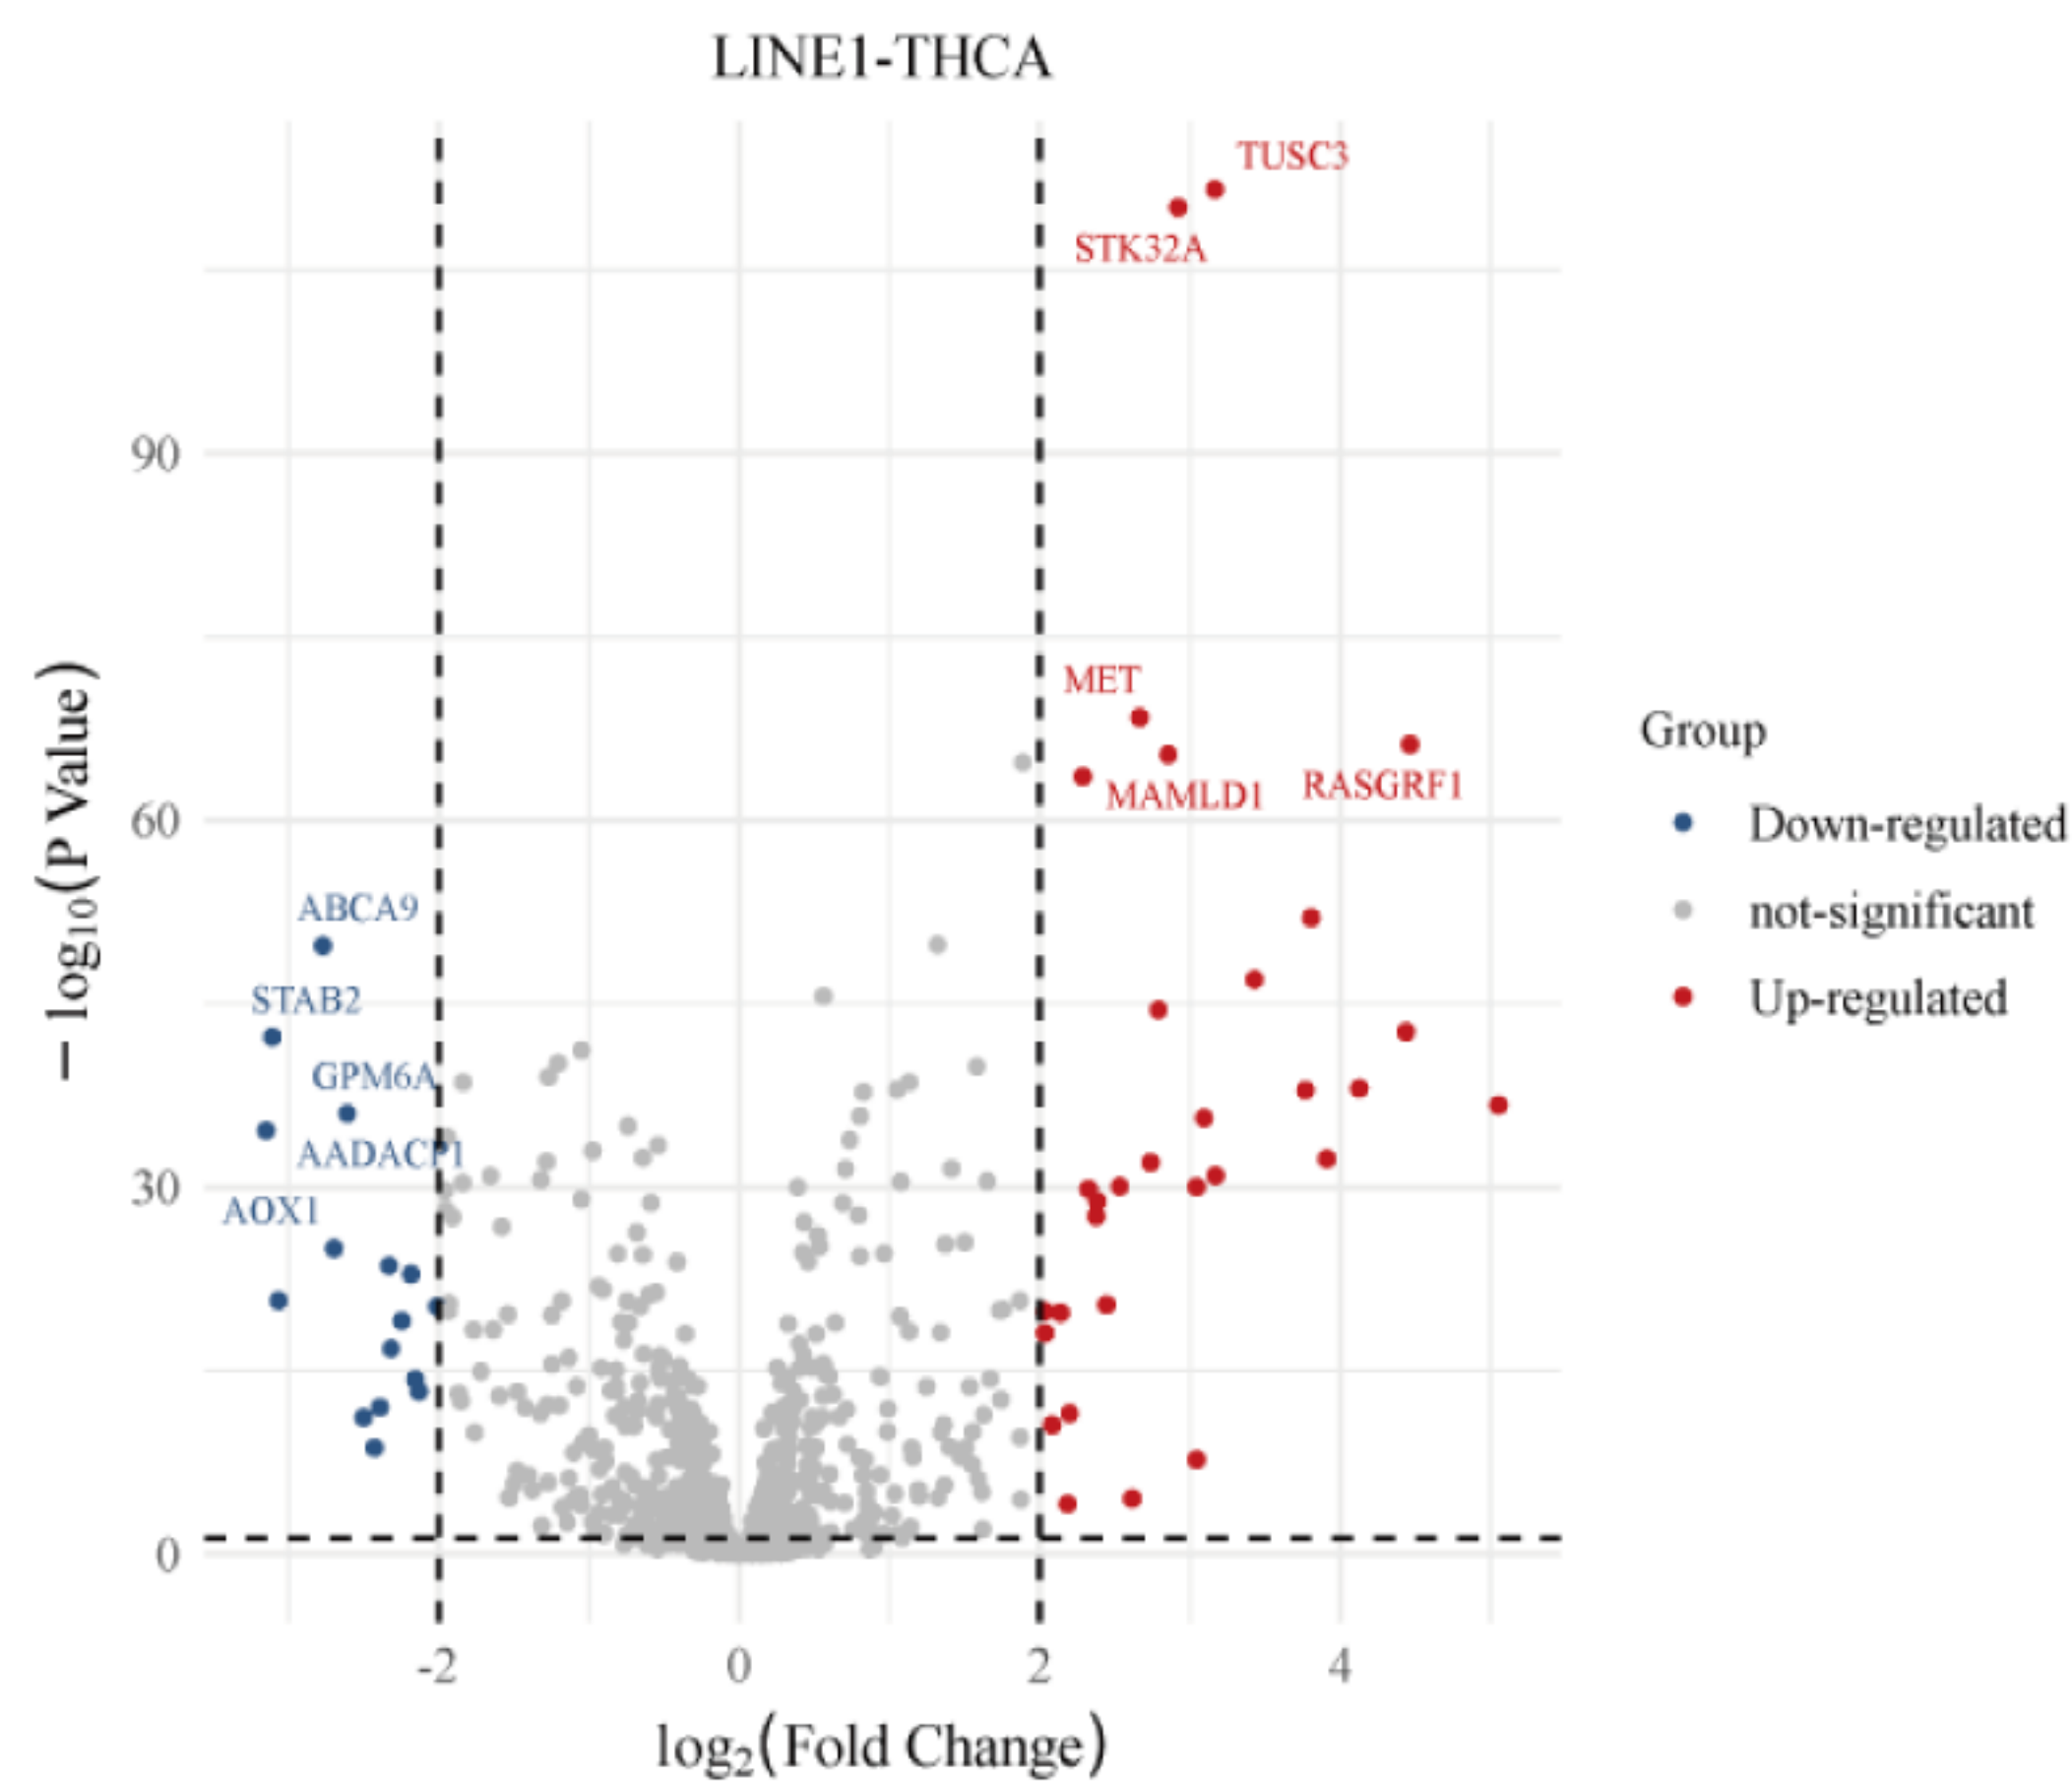

Supplement: 13100_2023_300_MOESM1_ESM.pdf [file 13100_2023_300_MOESM1_ESM.pdf]
