# Supplementary material for: Pan cancer characterization of genes whose expression has been associated with LINE-1 antisense promoter activity
Source: PubMed Central journal article supplement (PMC10506190; doi:10.1186/s13100-023-00300-x), 2023-09-18

# BRCA

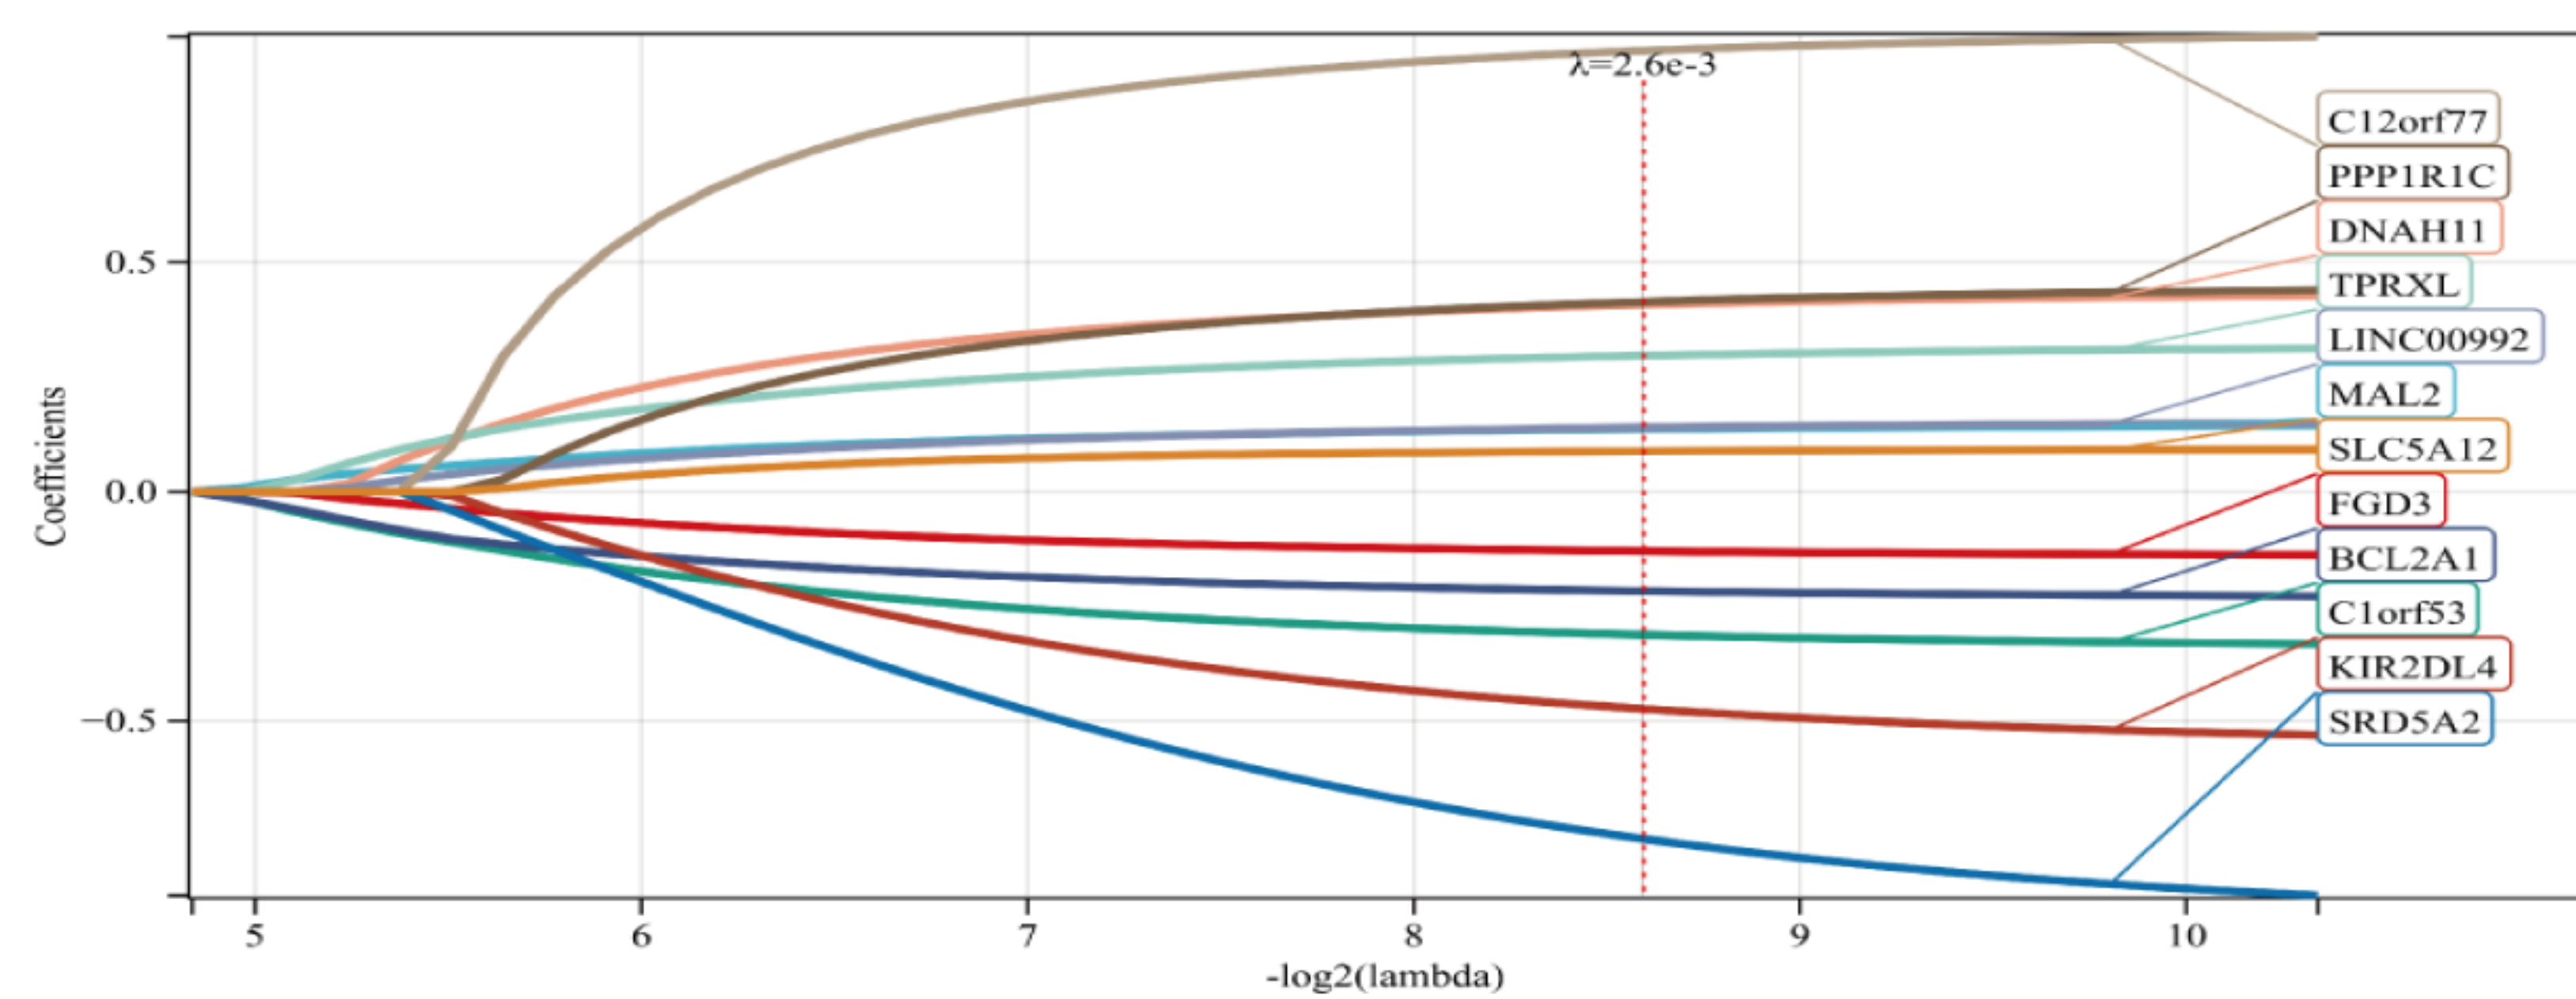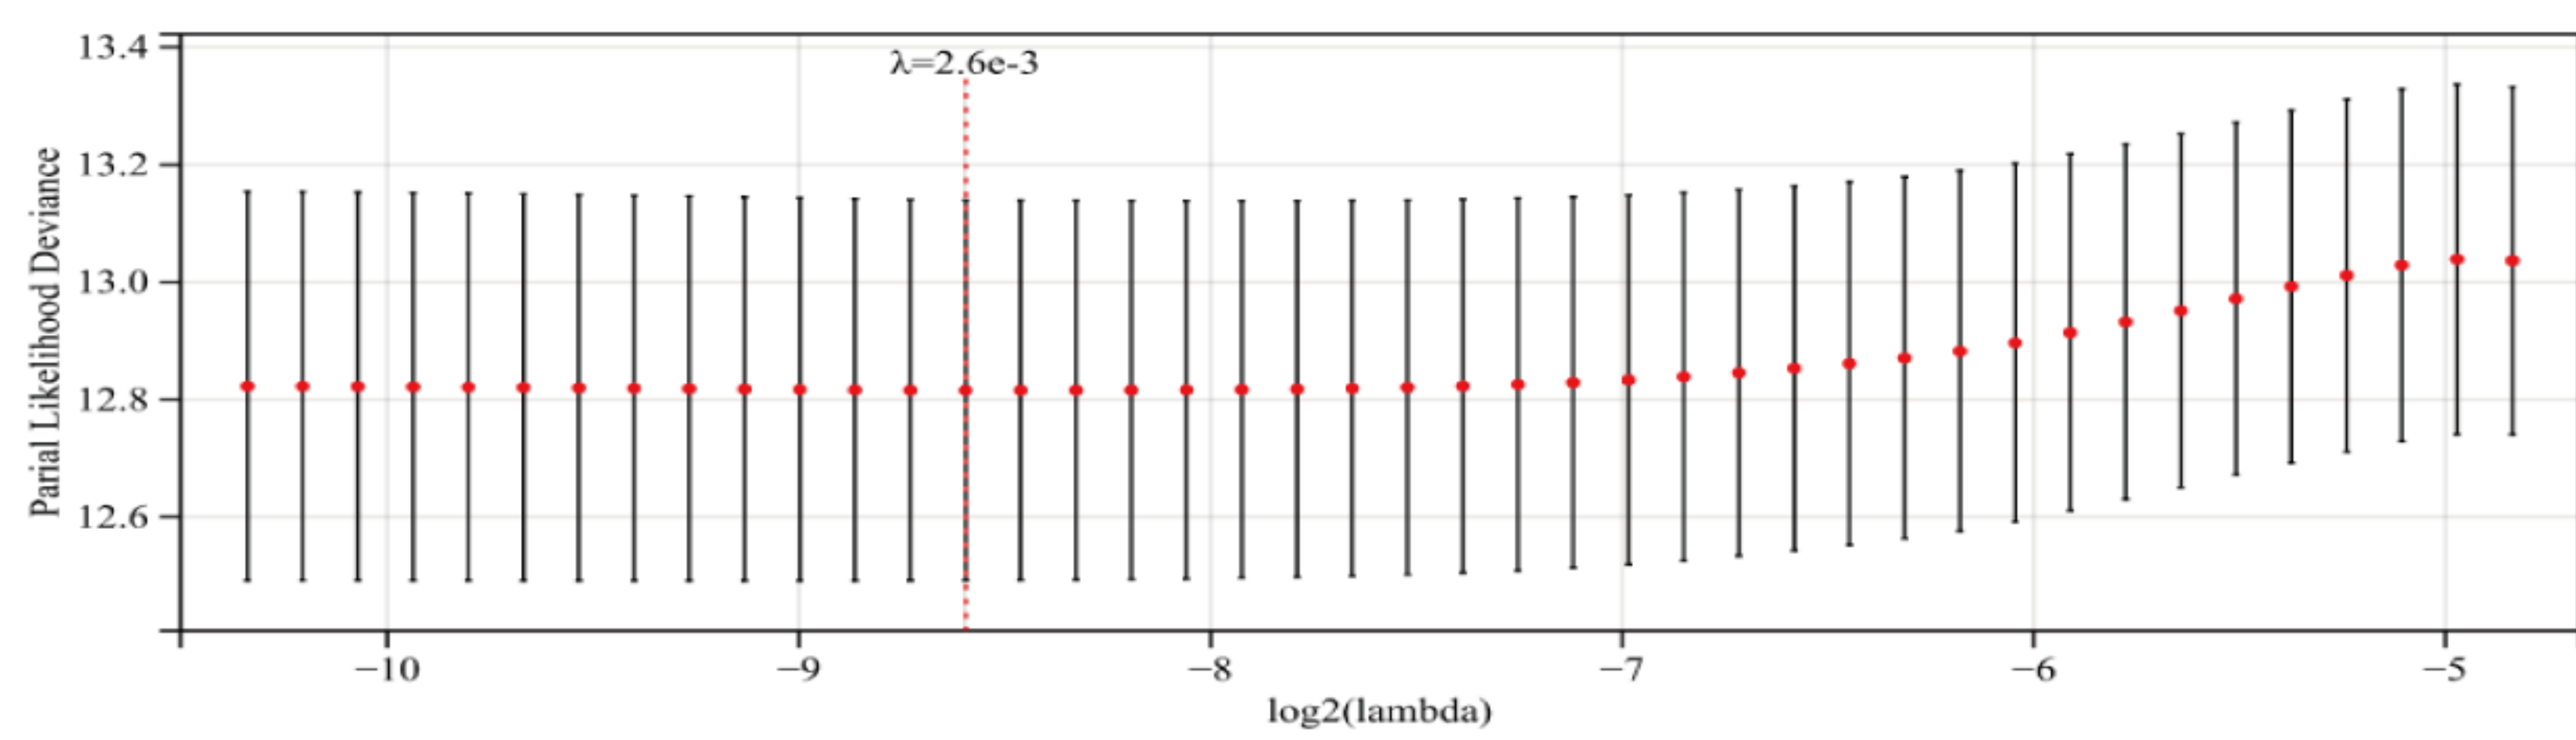

| Features | p-value | Hazard Ratio(95%CI) |
|----------|---------|---------------------|
| C1orf53  | 4.0e-3  | 0.71(0.56-0.90)     |
| TPRXL    | 0.02    | 1.37(1.06-1.78)     |
| PPP1R1C  | 0.02    | 1.57(1.08-2.28)     |
| BCL2A1   | 0.03    | 0.79(0.64-0.97)     |
| FGD3     | 0.03    | 0.87(0.76-0.99)     |
| DNAH11   | 0.04    | 1.54(1.02-2.35)     |

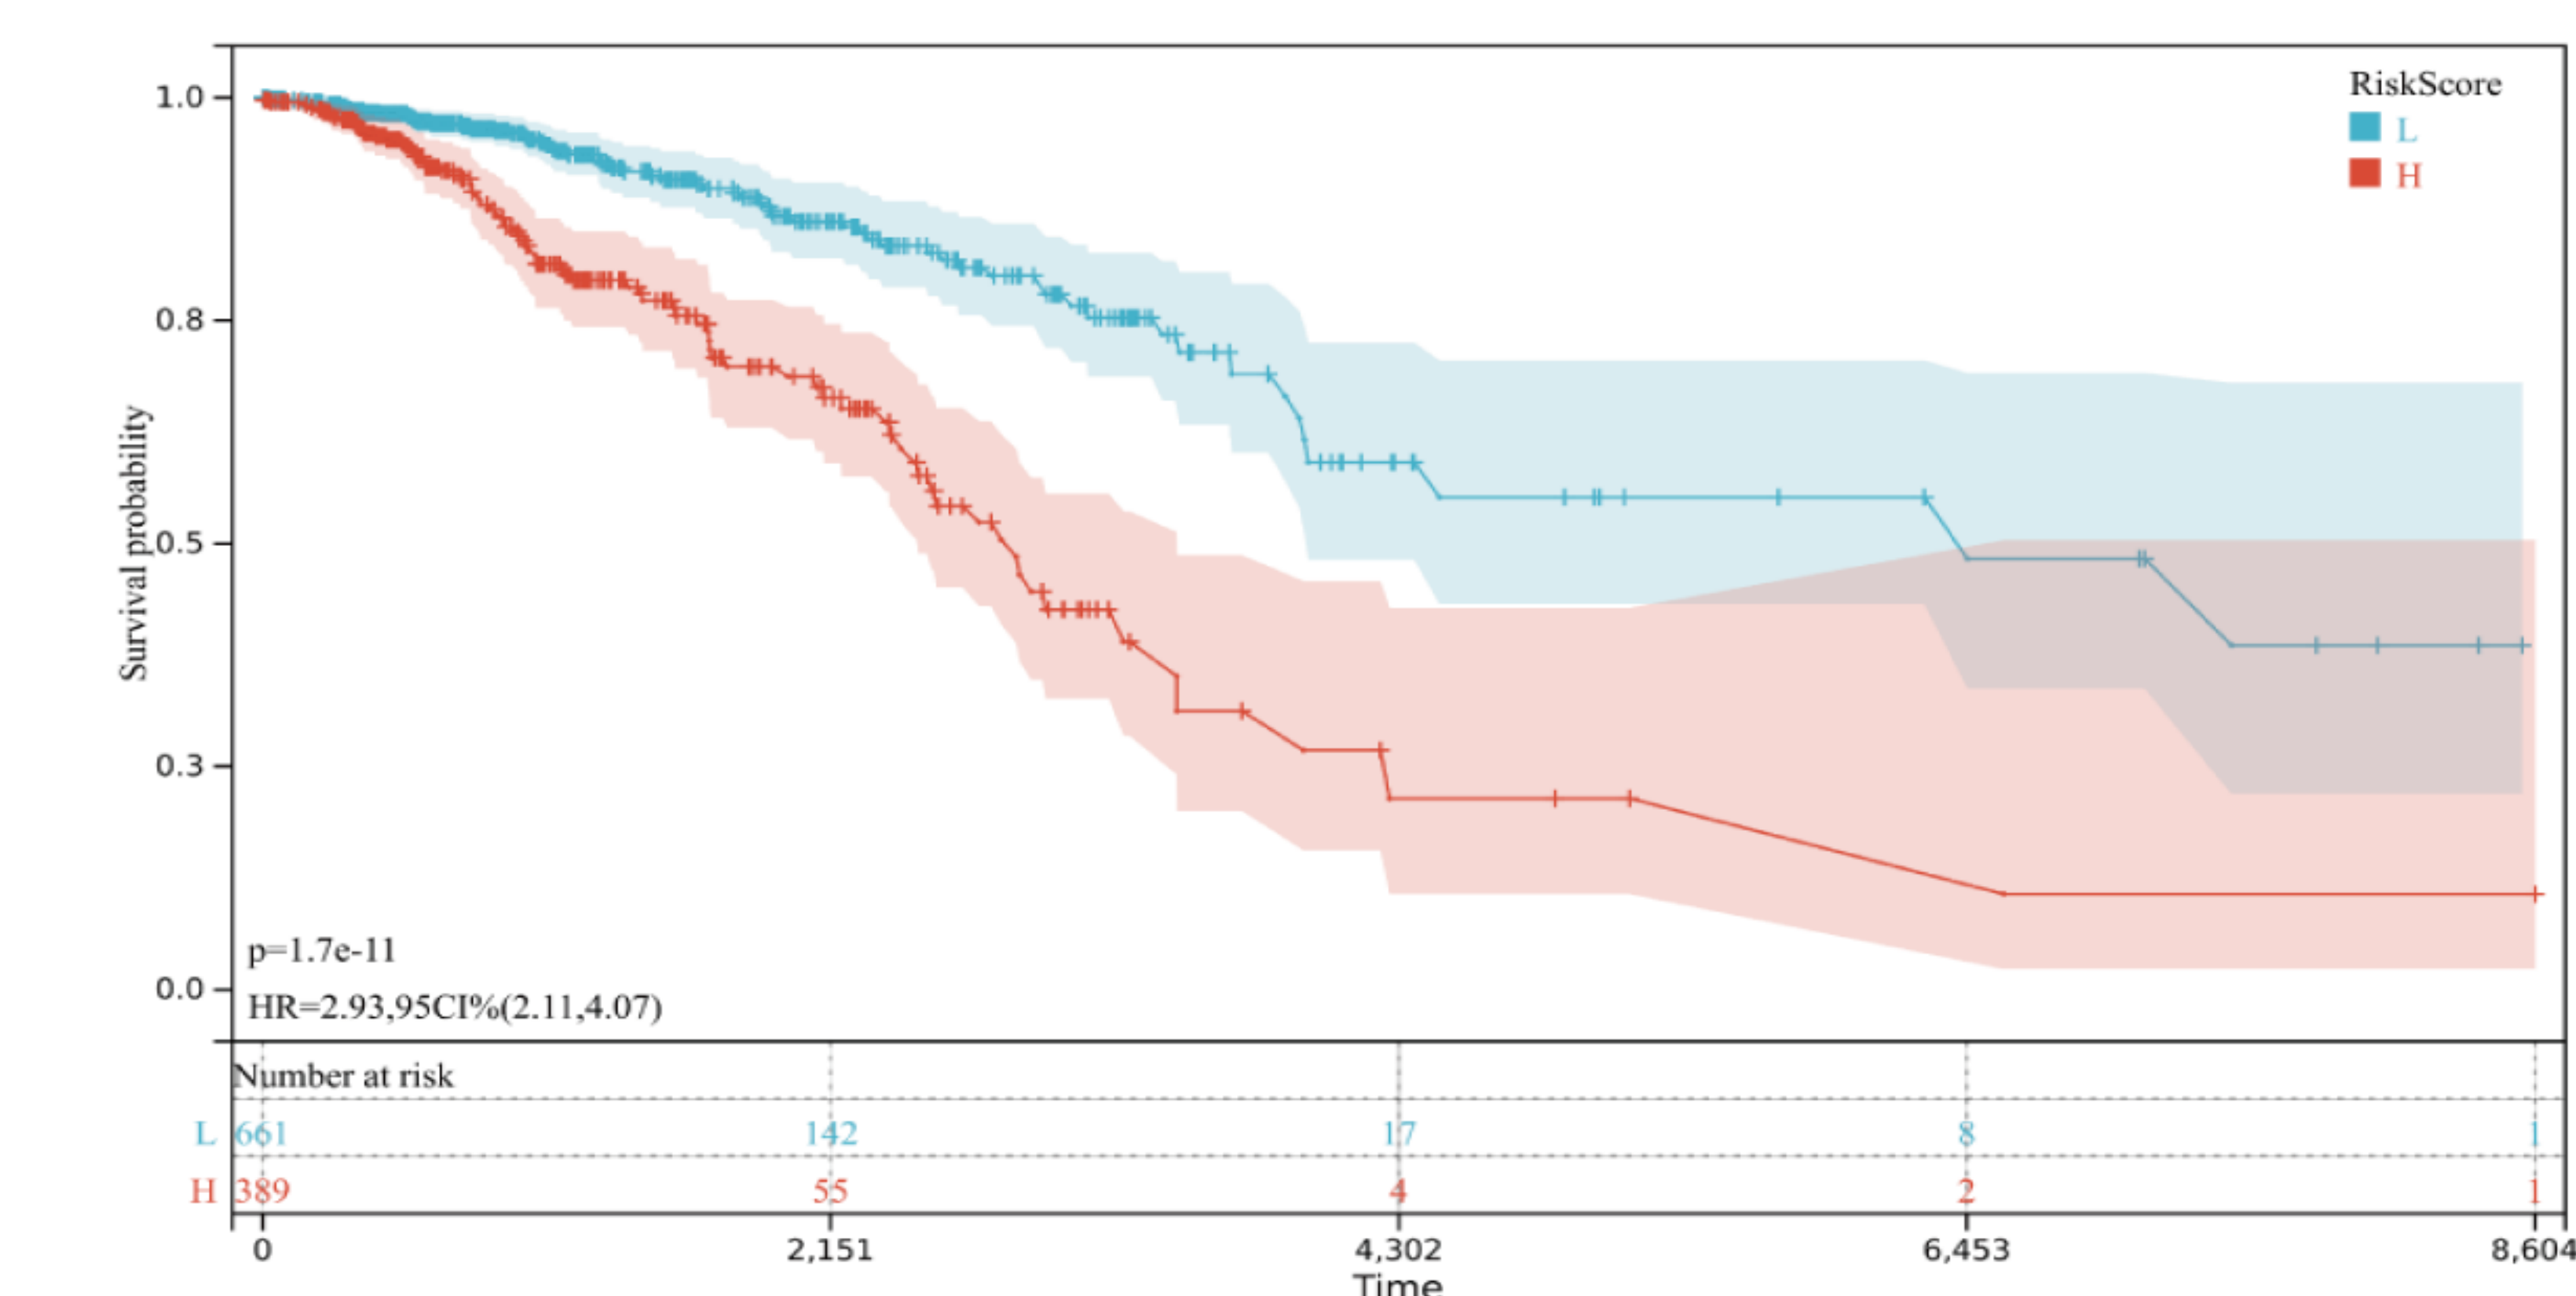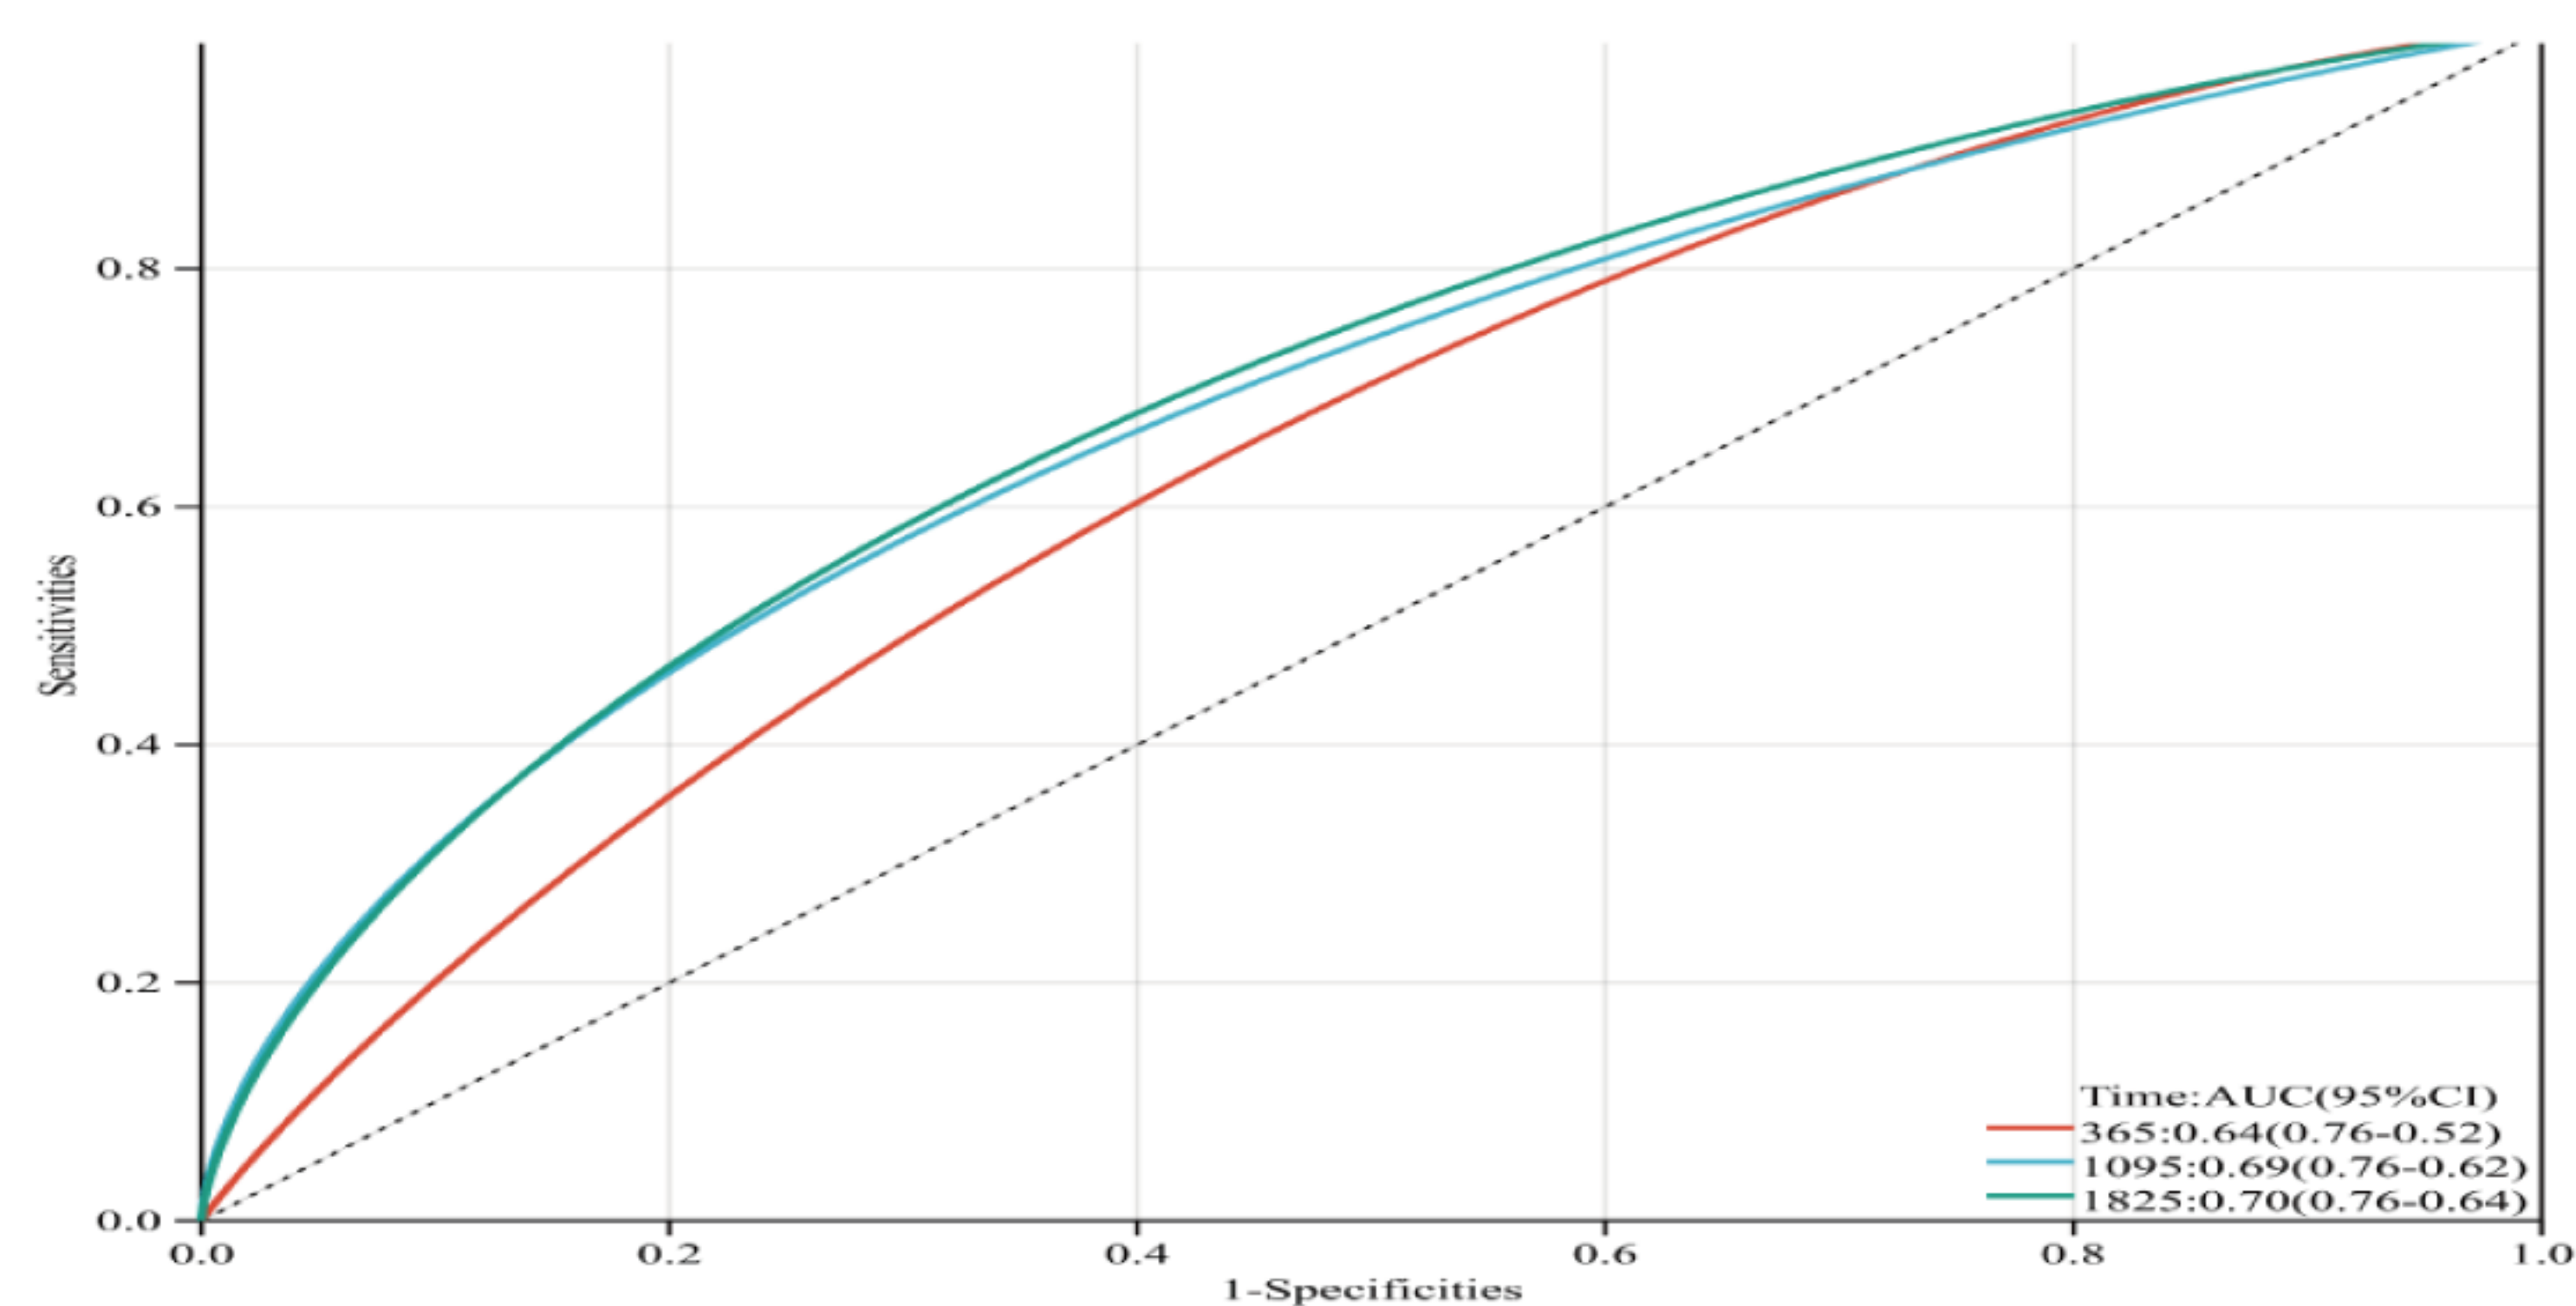

# CHOL

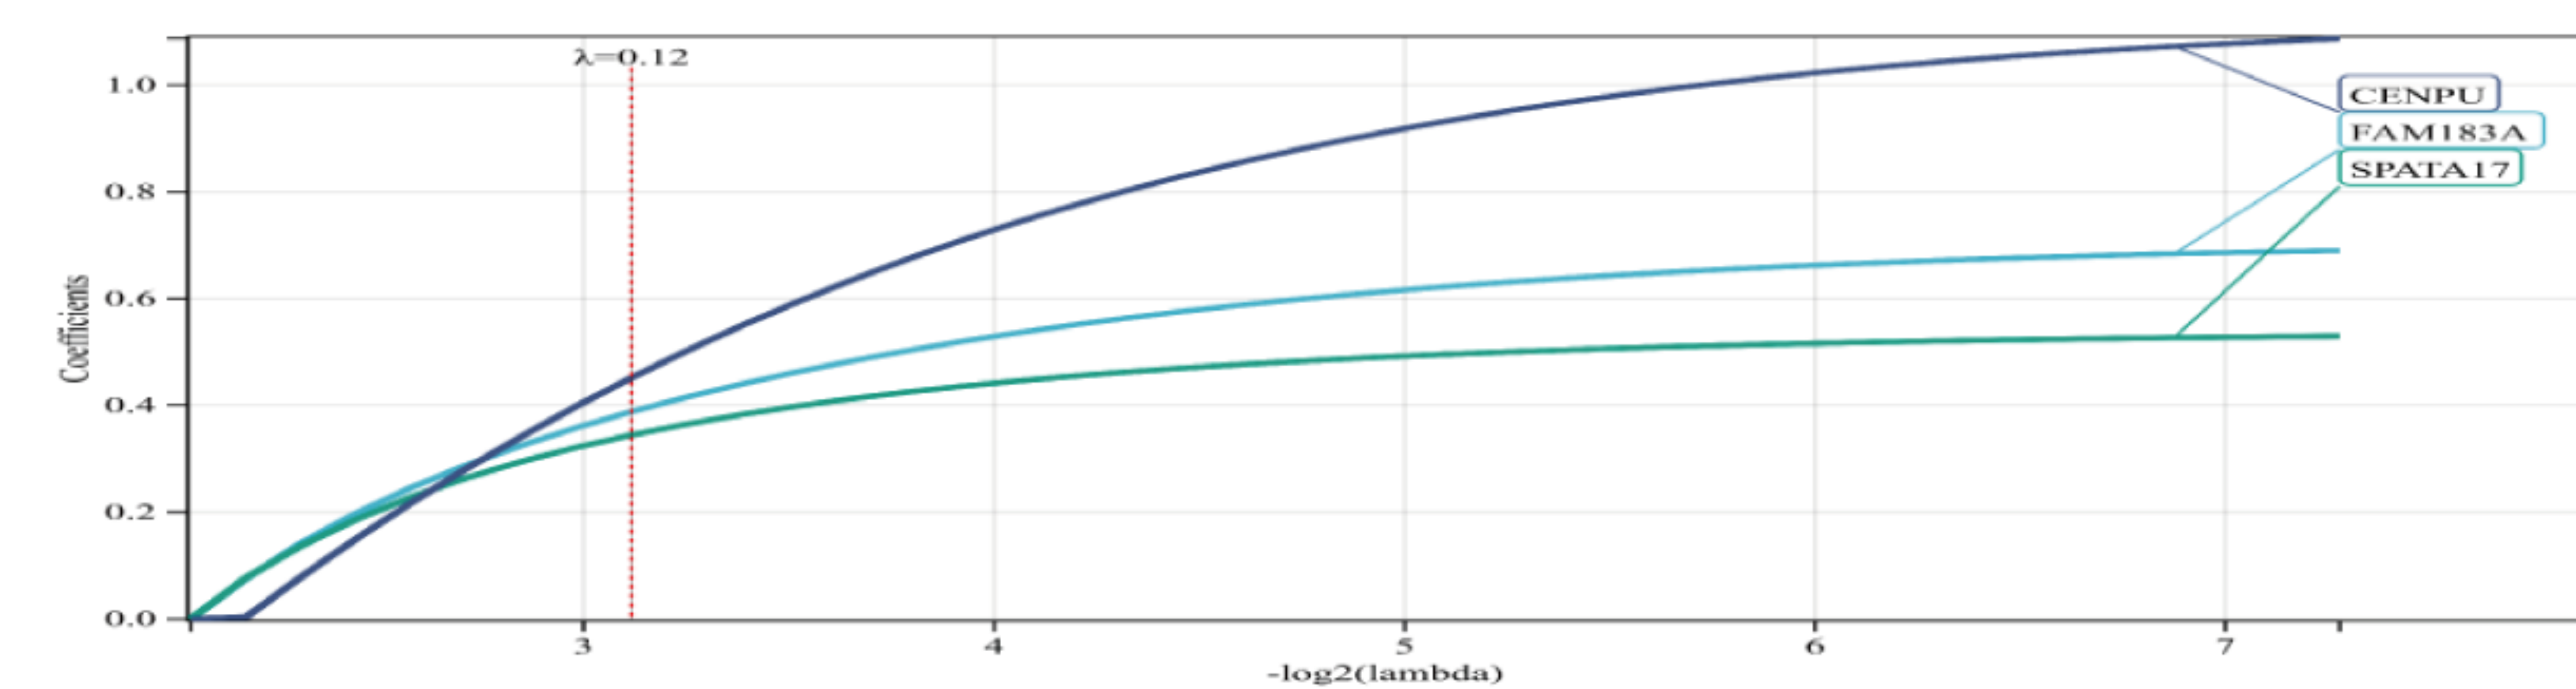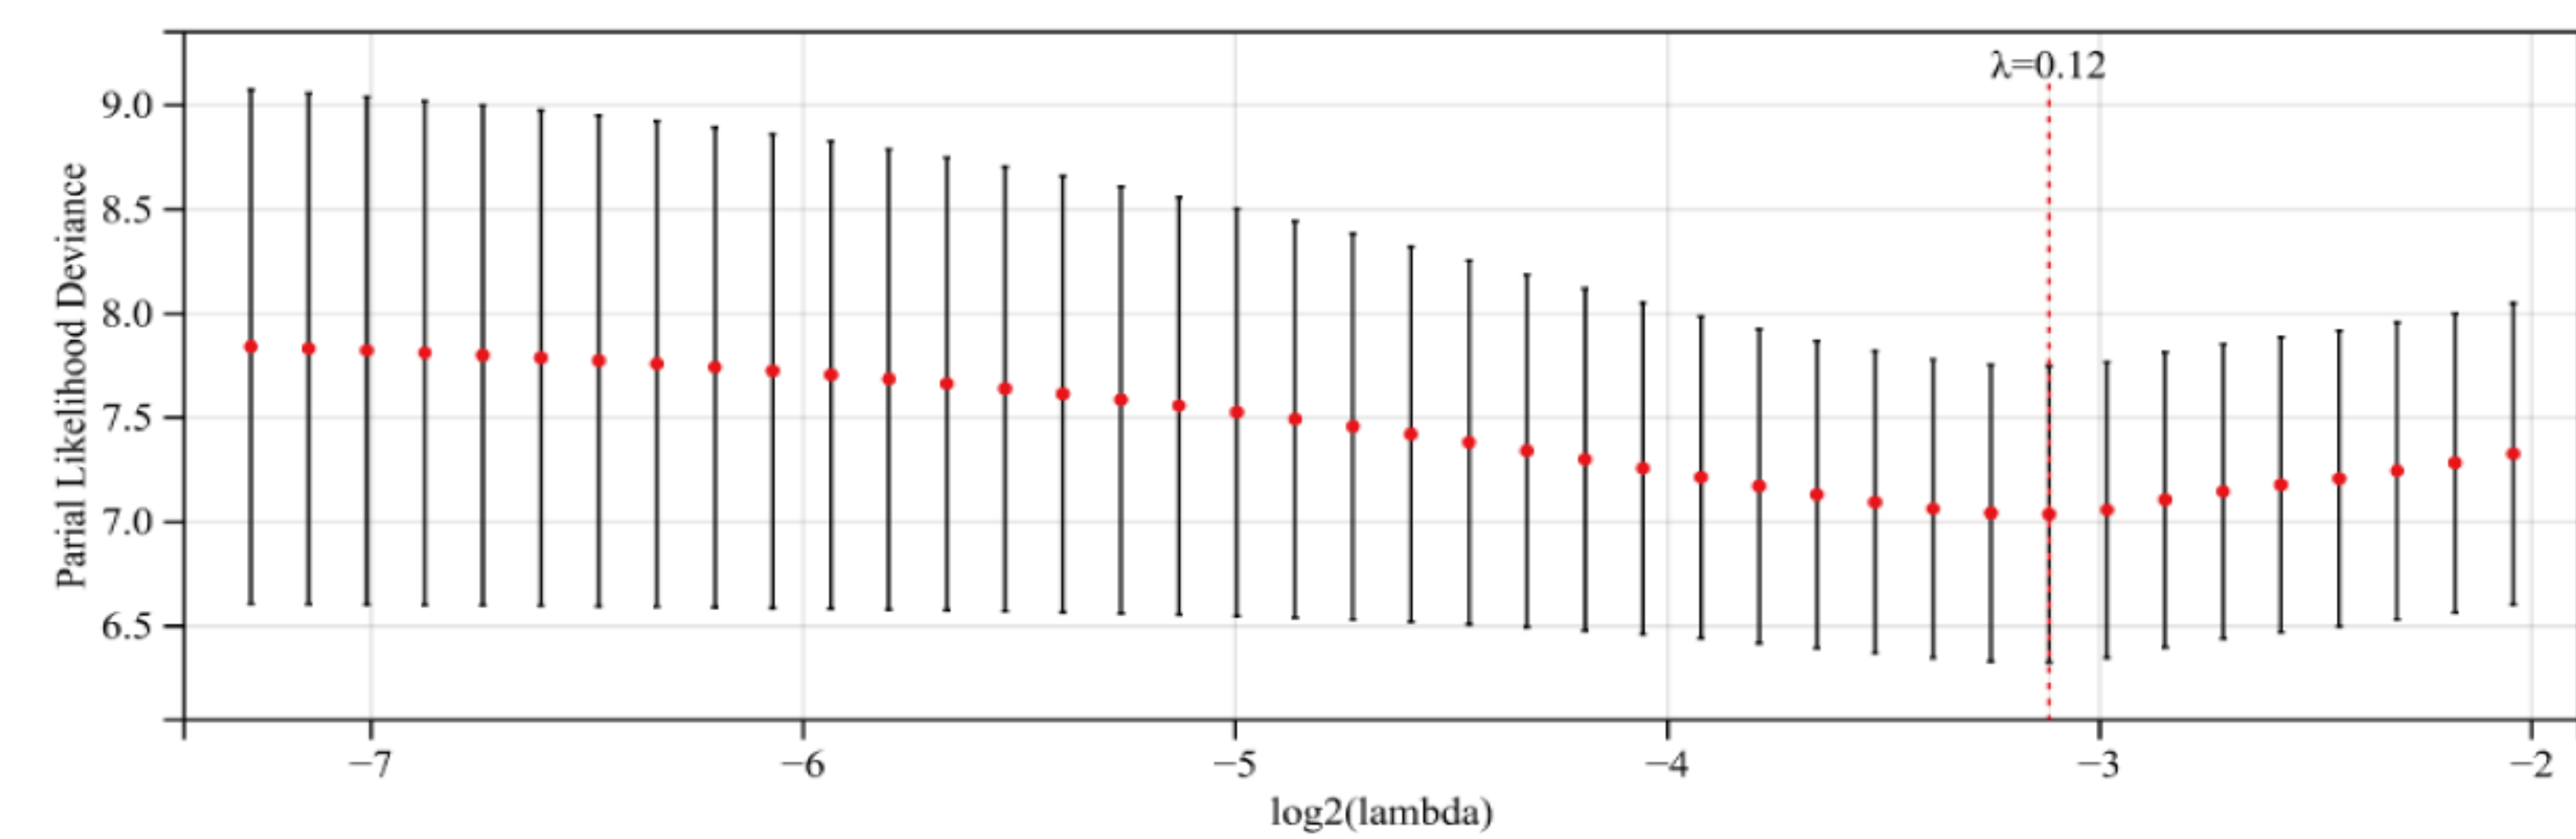

| Features | p-value | Hazard Ratio(95%CI) |
|----------|---------|---------------------|
| CENPU    | 0.04    | 3.11(1.04-9.27)     |

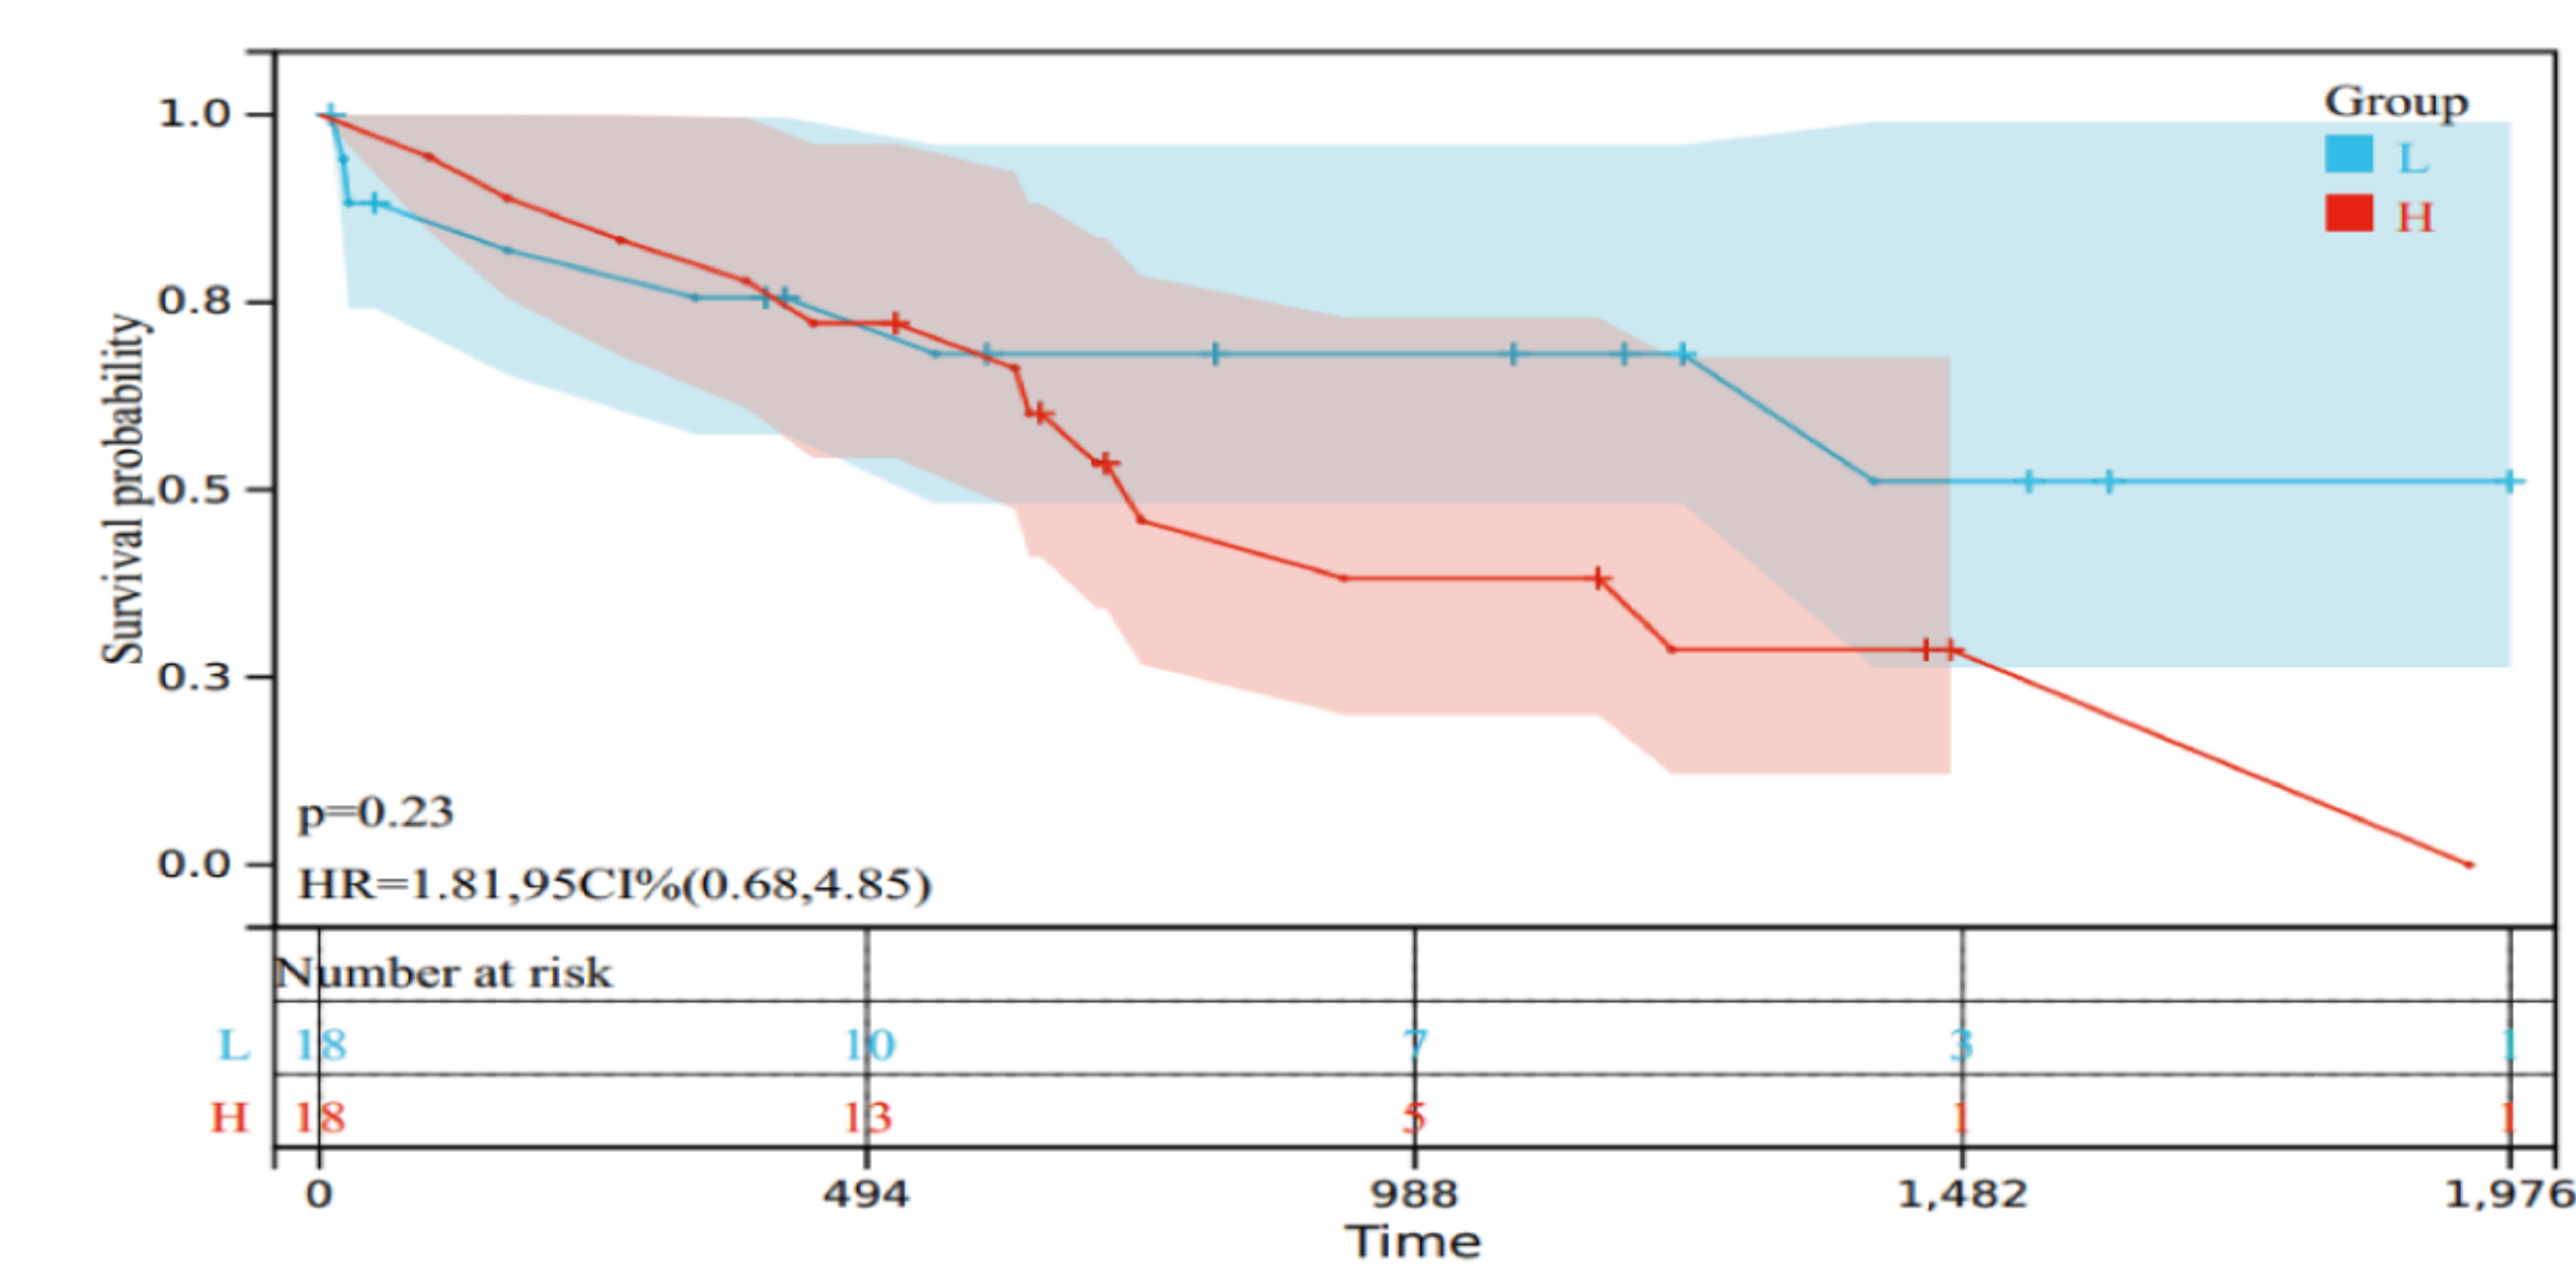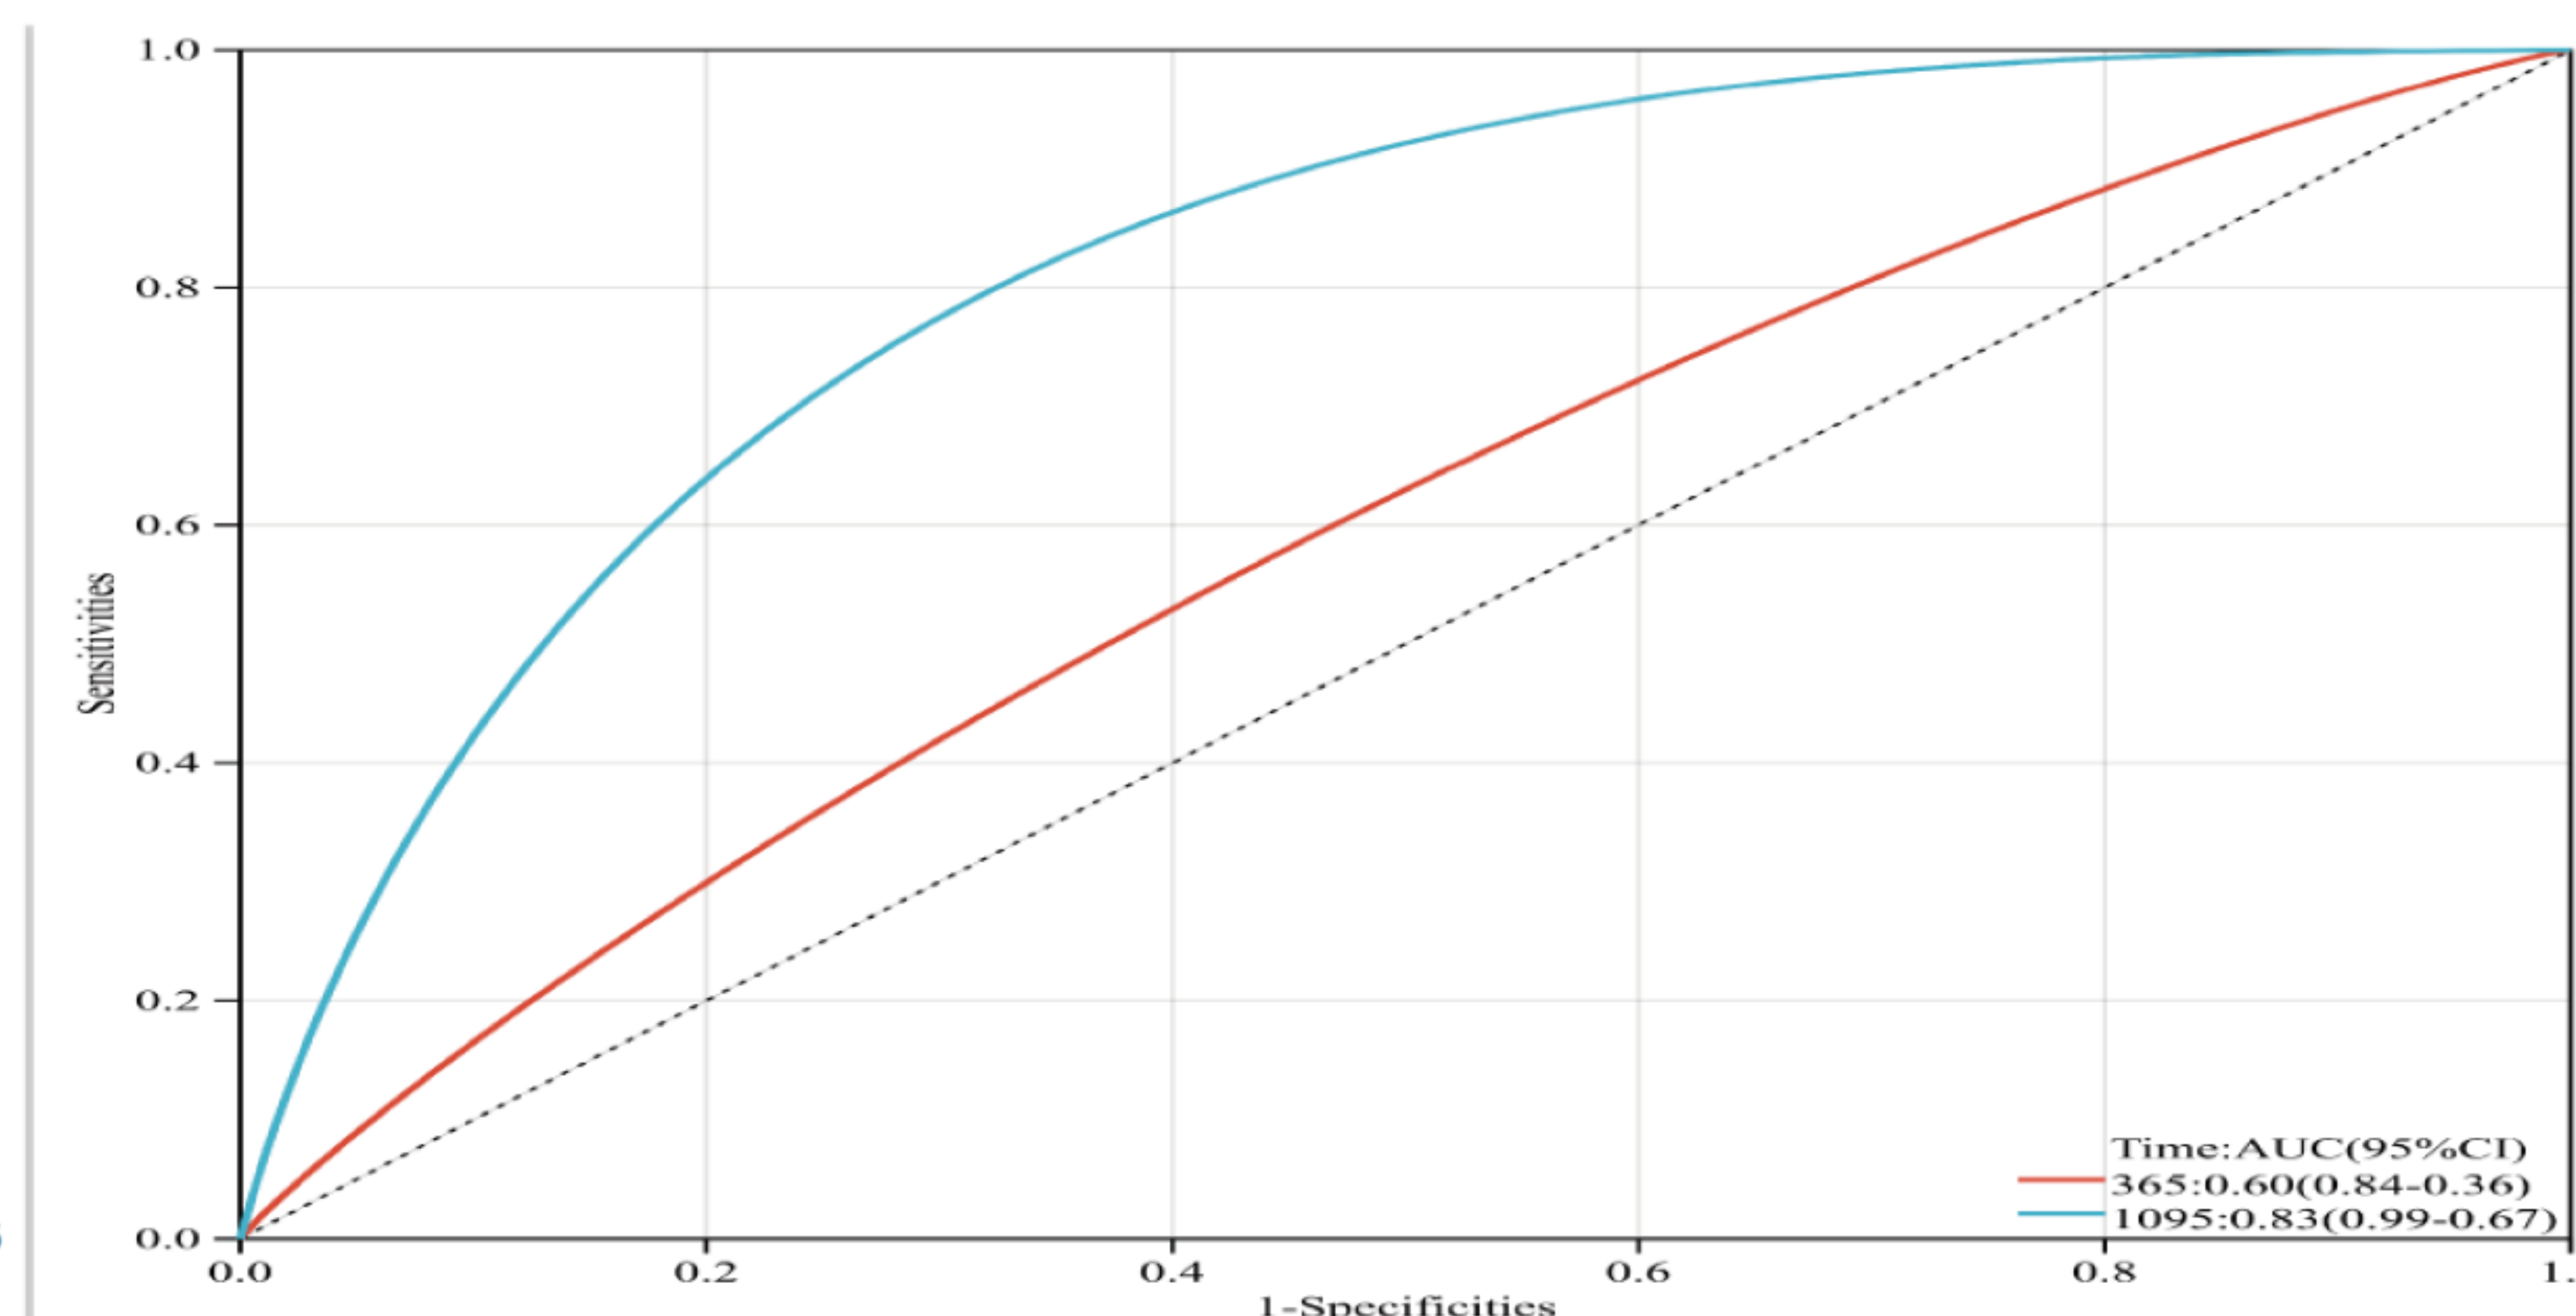



# COAD

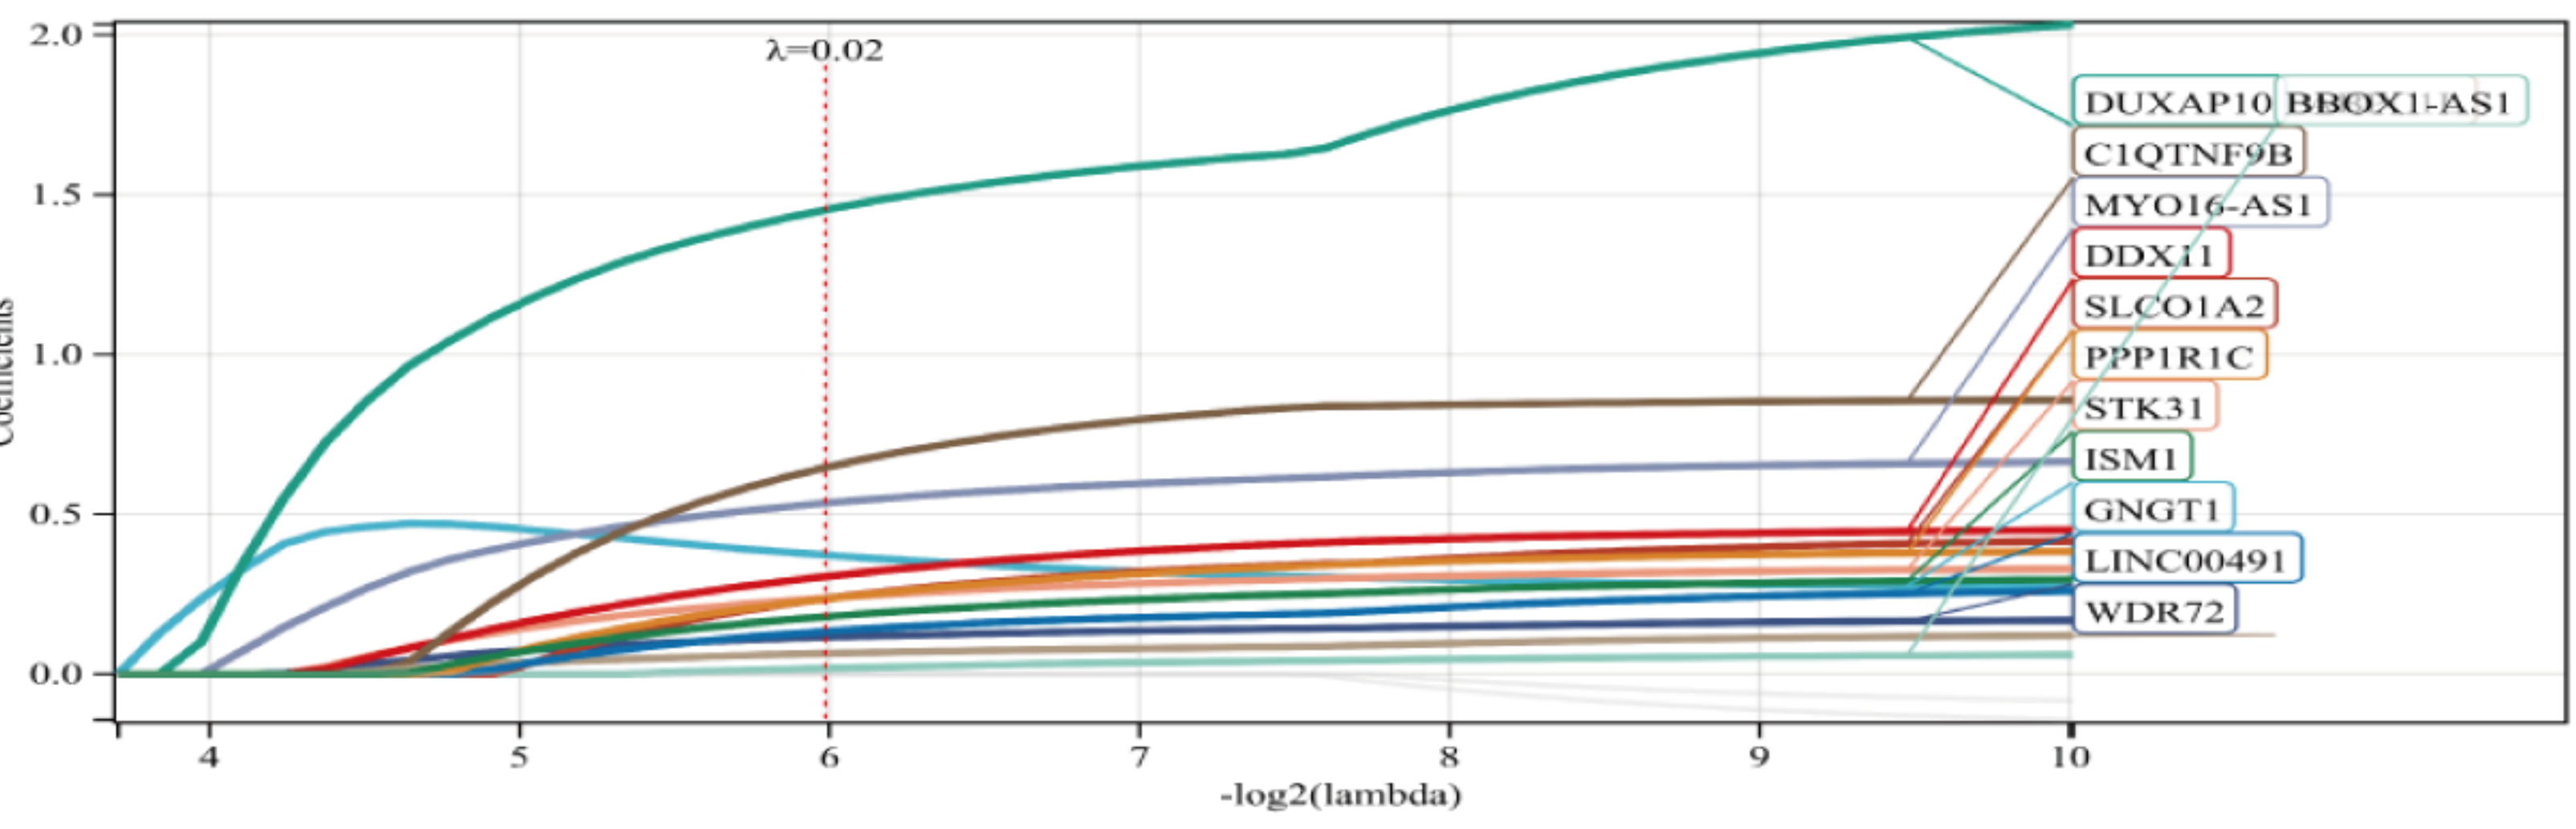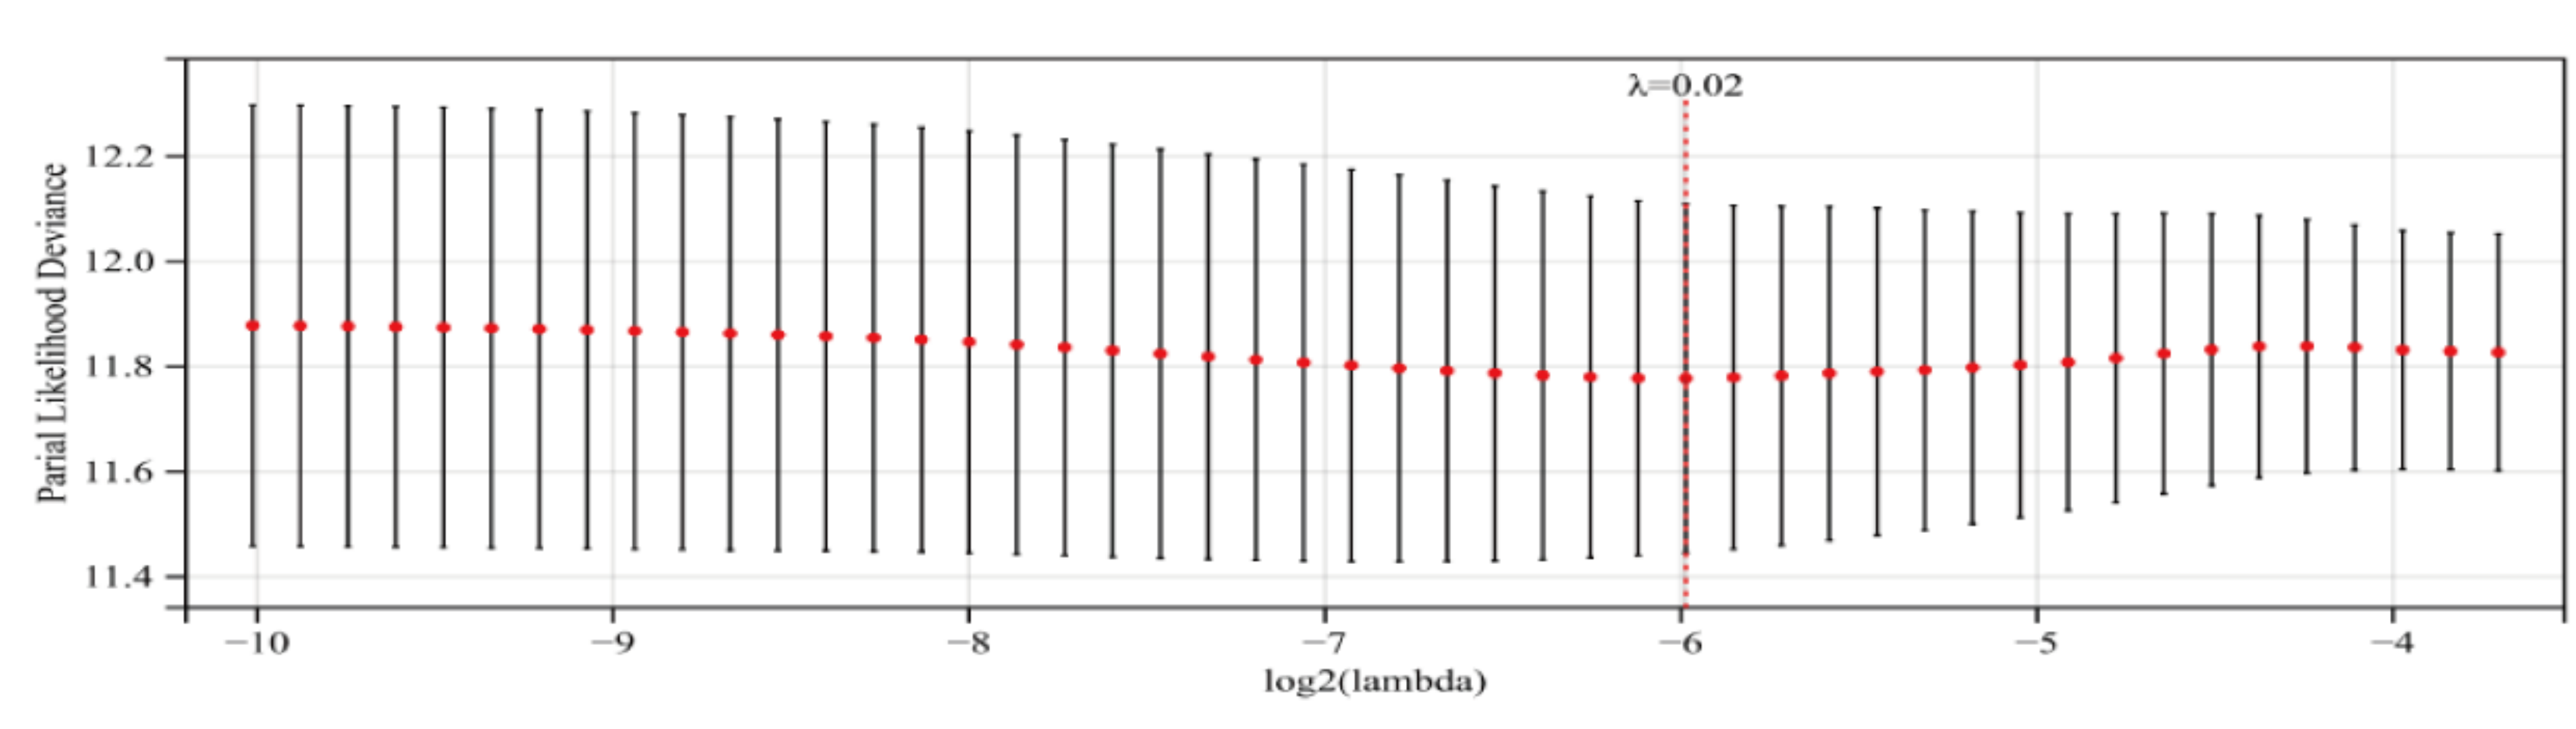

| Features  | p-value | Hazard Ratio(95%CI) |
|-----------|---------|---------------------|
| MYO16-AS1 | 0.01    | 1.92(1.14-3.24)     |
| DUXAP10   | 0.03    | 5.63(1.17-27.18)    |
| DDX11     | 0.04    | 1.59(1.02-2.49)     |
| ISM1      | 0.05    | 1.33(1.00-1.77)     |

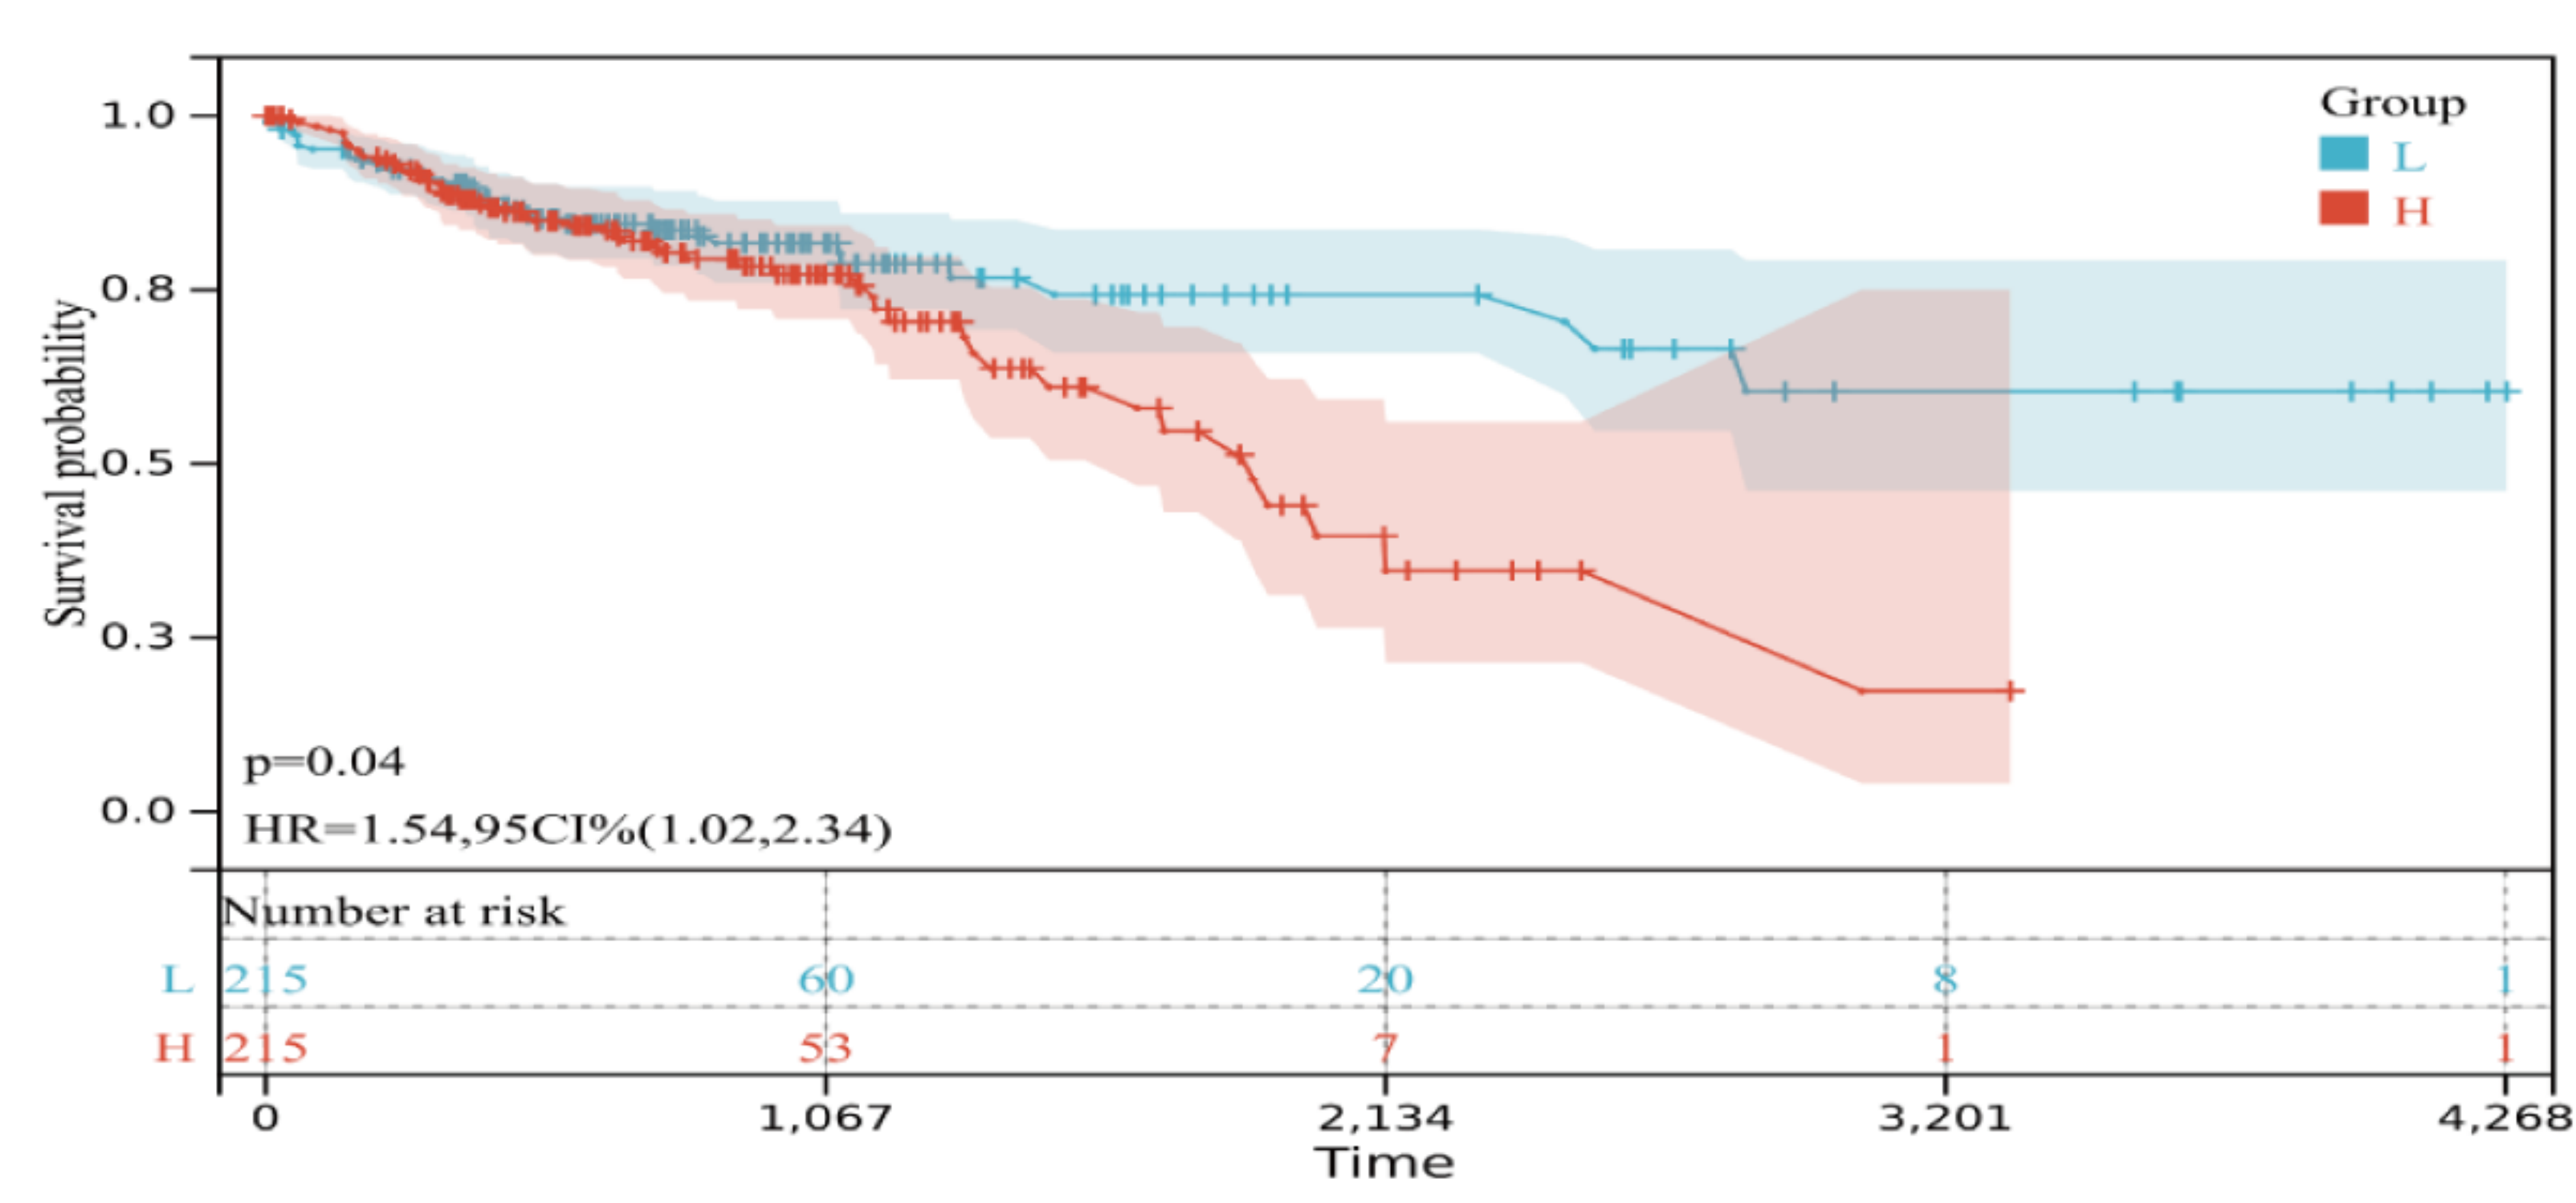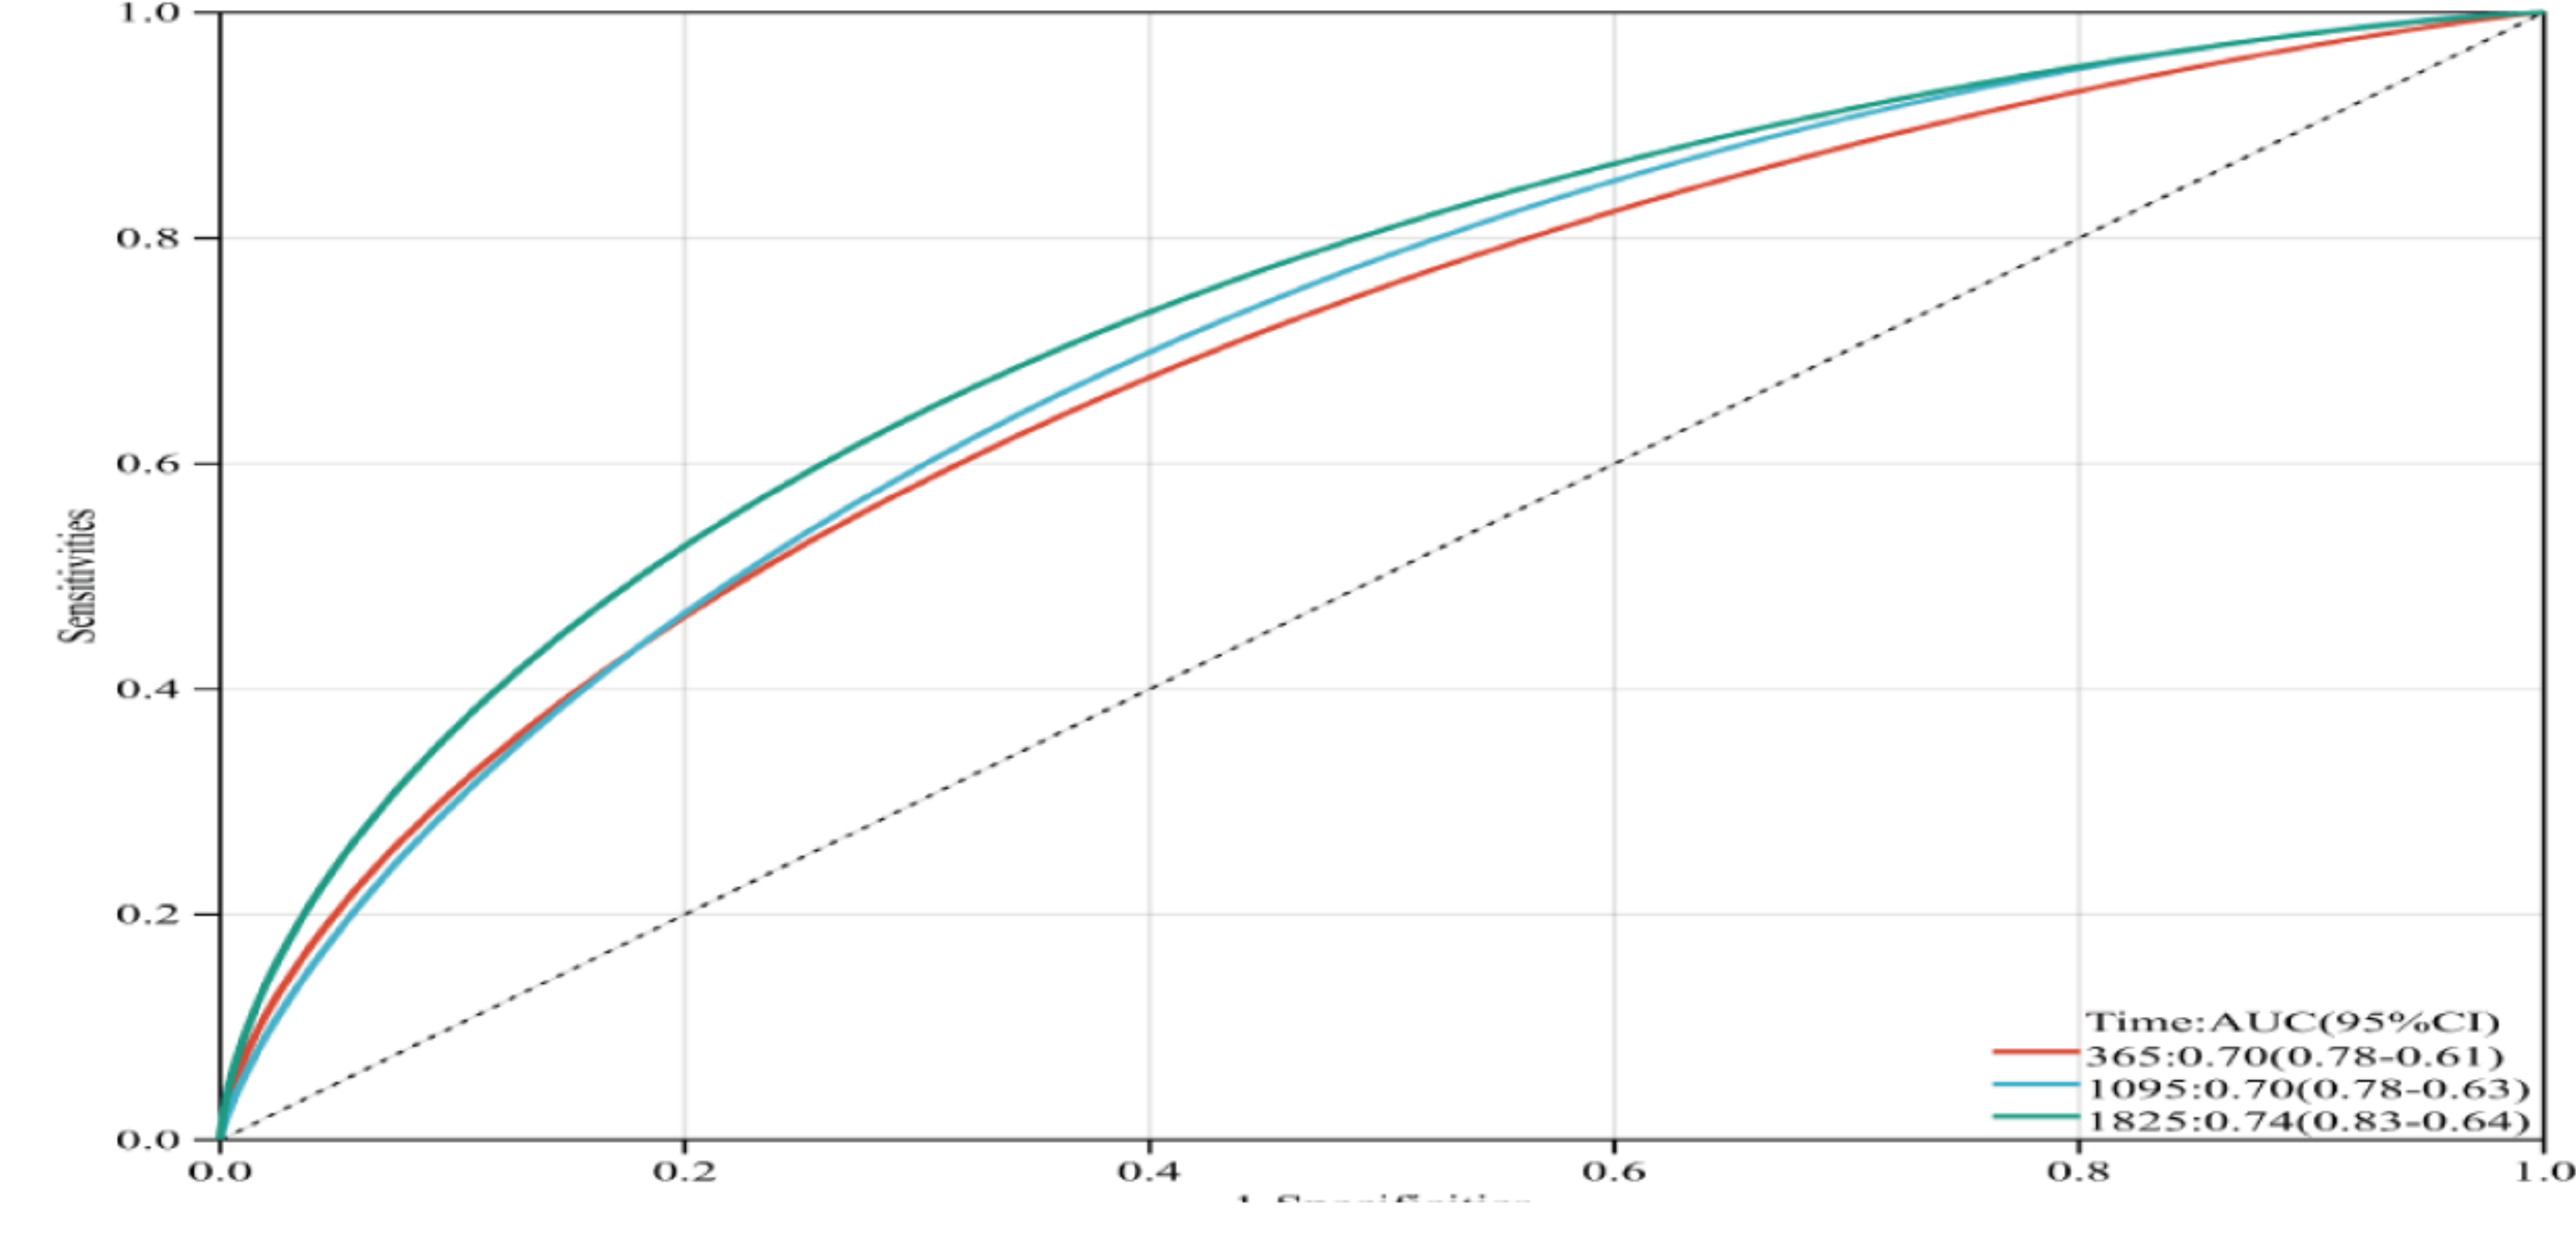

# KIRC

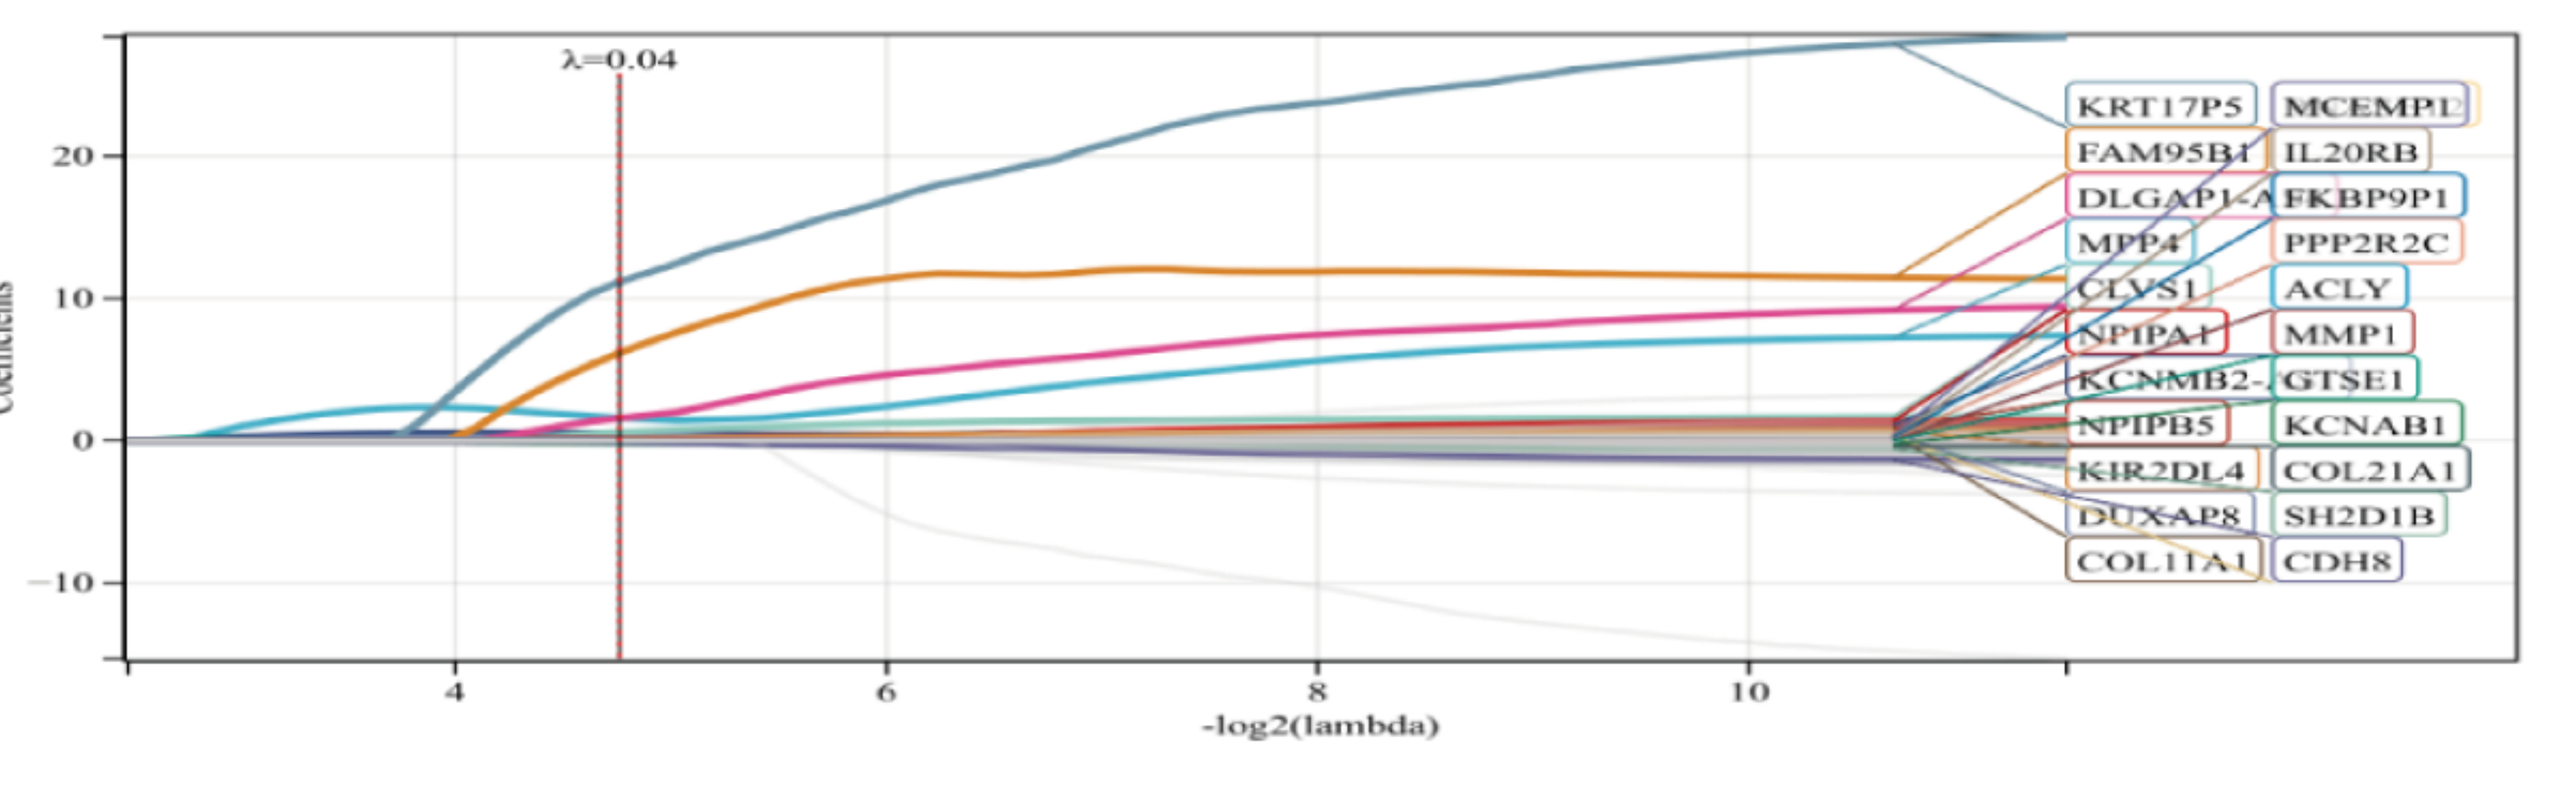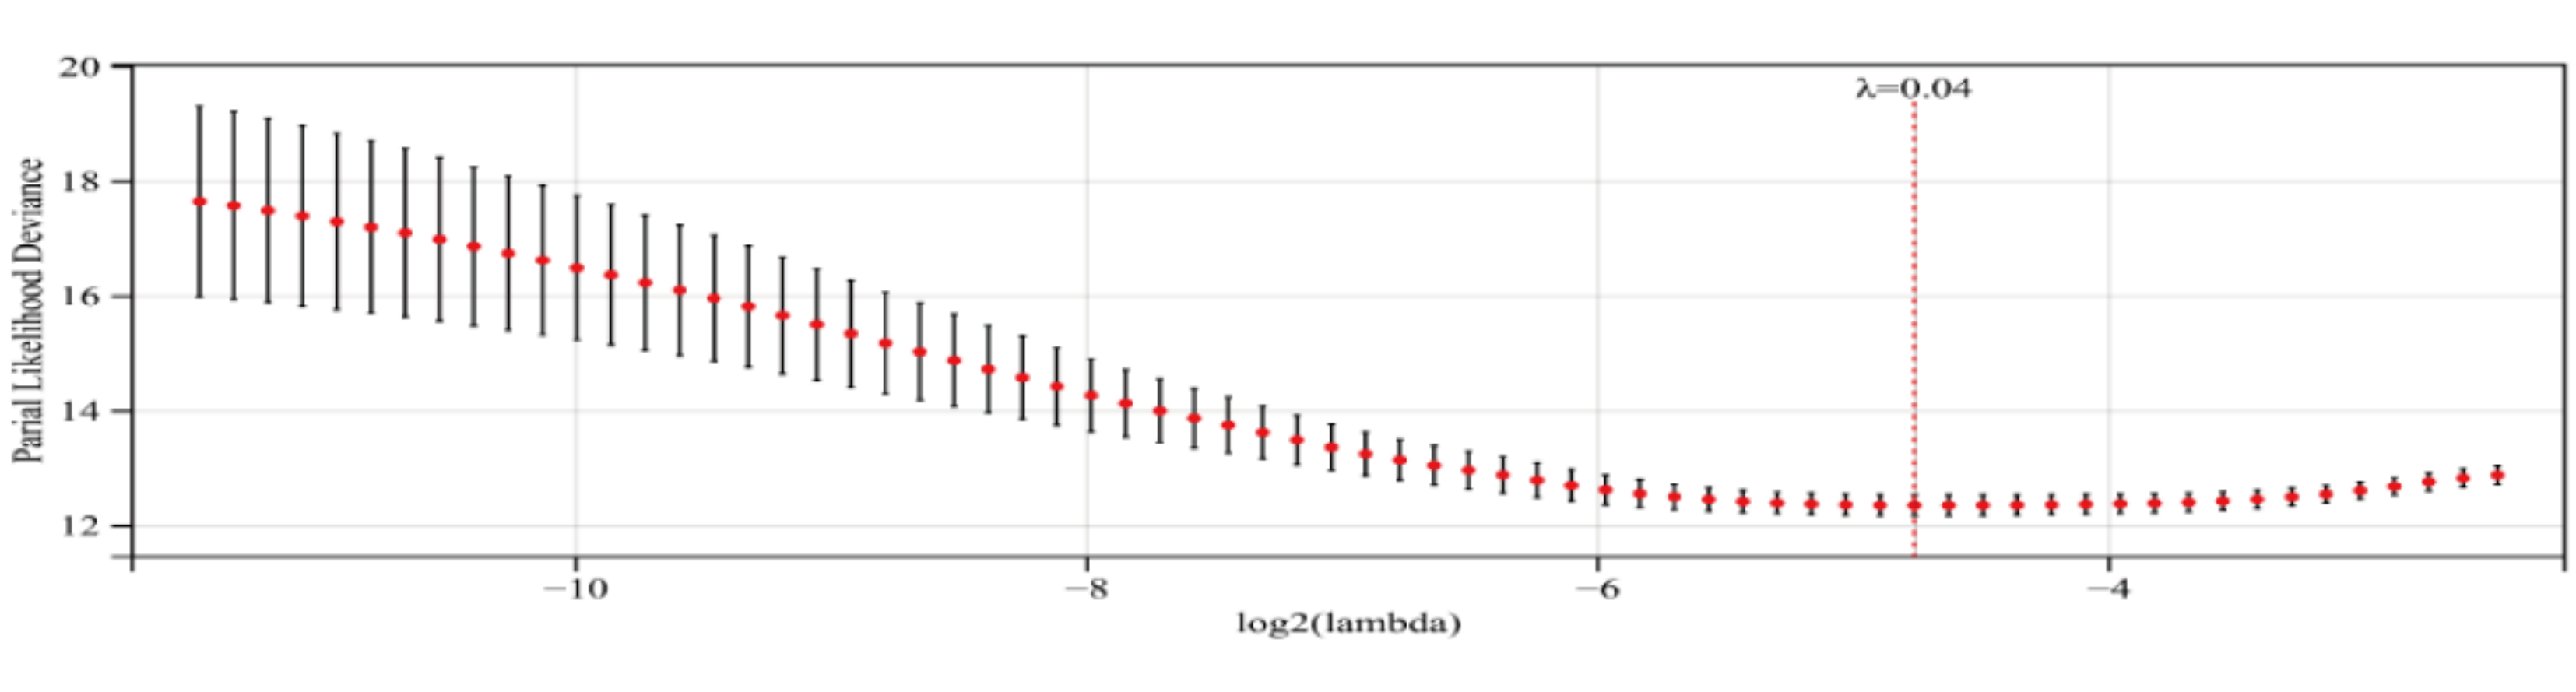

| Features   | p-value | Hazard Ratio(95%CI)                    |
|------------|---------|----------------------------------------|
| COL11A1    | 1.2e-6  | 1.50(1.27-1.77)                        |
| FAM95B1    | 3.8e-5  | 4260242.16(2980.88-6088689972.53)      |
| CLVS1      | 6.4e-5  | 4.75(2.21-10.22)                       |
| RNASET2    | 3.4e-3  | 1.22(1.07-1.39)                        |
| KRT17P5    | 0.01    | 267778935.00(74.25-965784601966810.00) |
| PPP2R2C    | 0.02    | 1.36(1.05-1.74)                        |
| DLGAP1-AS4 | 0.02    | 89.83(2.14-3769.12)                    |
| KIR2DL4    | 0.02    | 1.75(1.10-2.79)                        |
| COL21A1    | 0.02    | 0.77(0.62-0.97)                        |
| SH2D1B     | 0.03    | 0.52(0.29-0.92)                        |
| DUXAP8     | 0.04    | 1.49(1.02-2.17)                        |
| CDH8       | 0.05    | 0.41(0.17-0.98)                        |

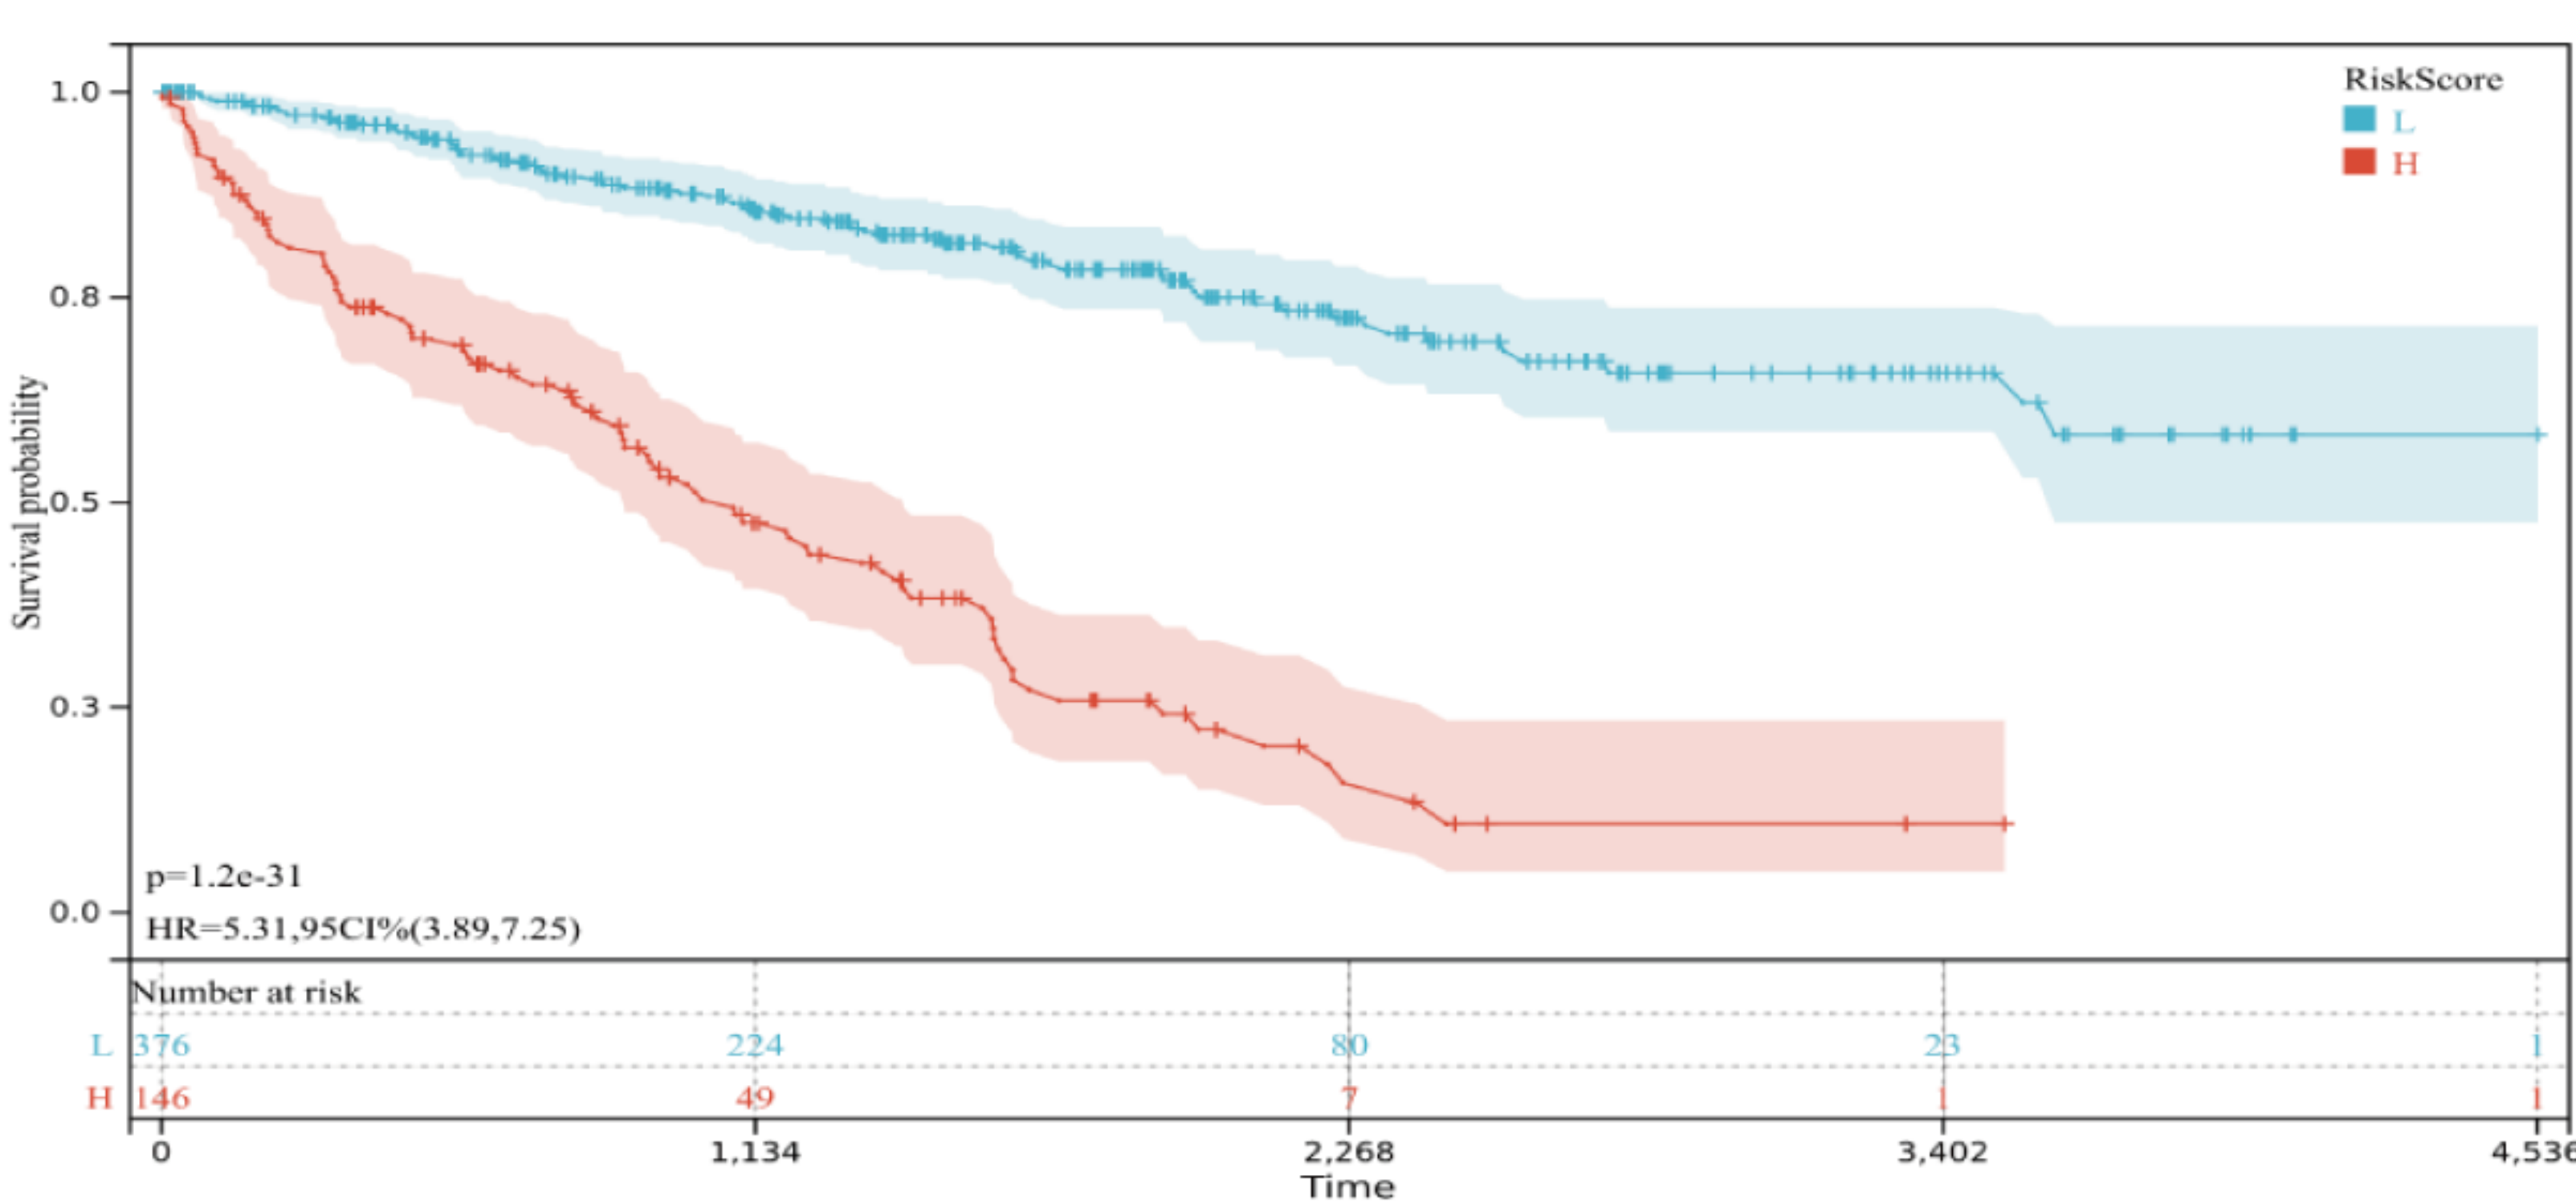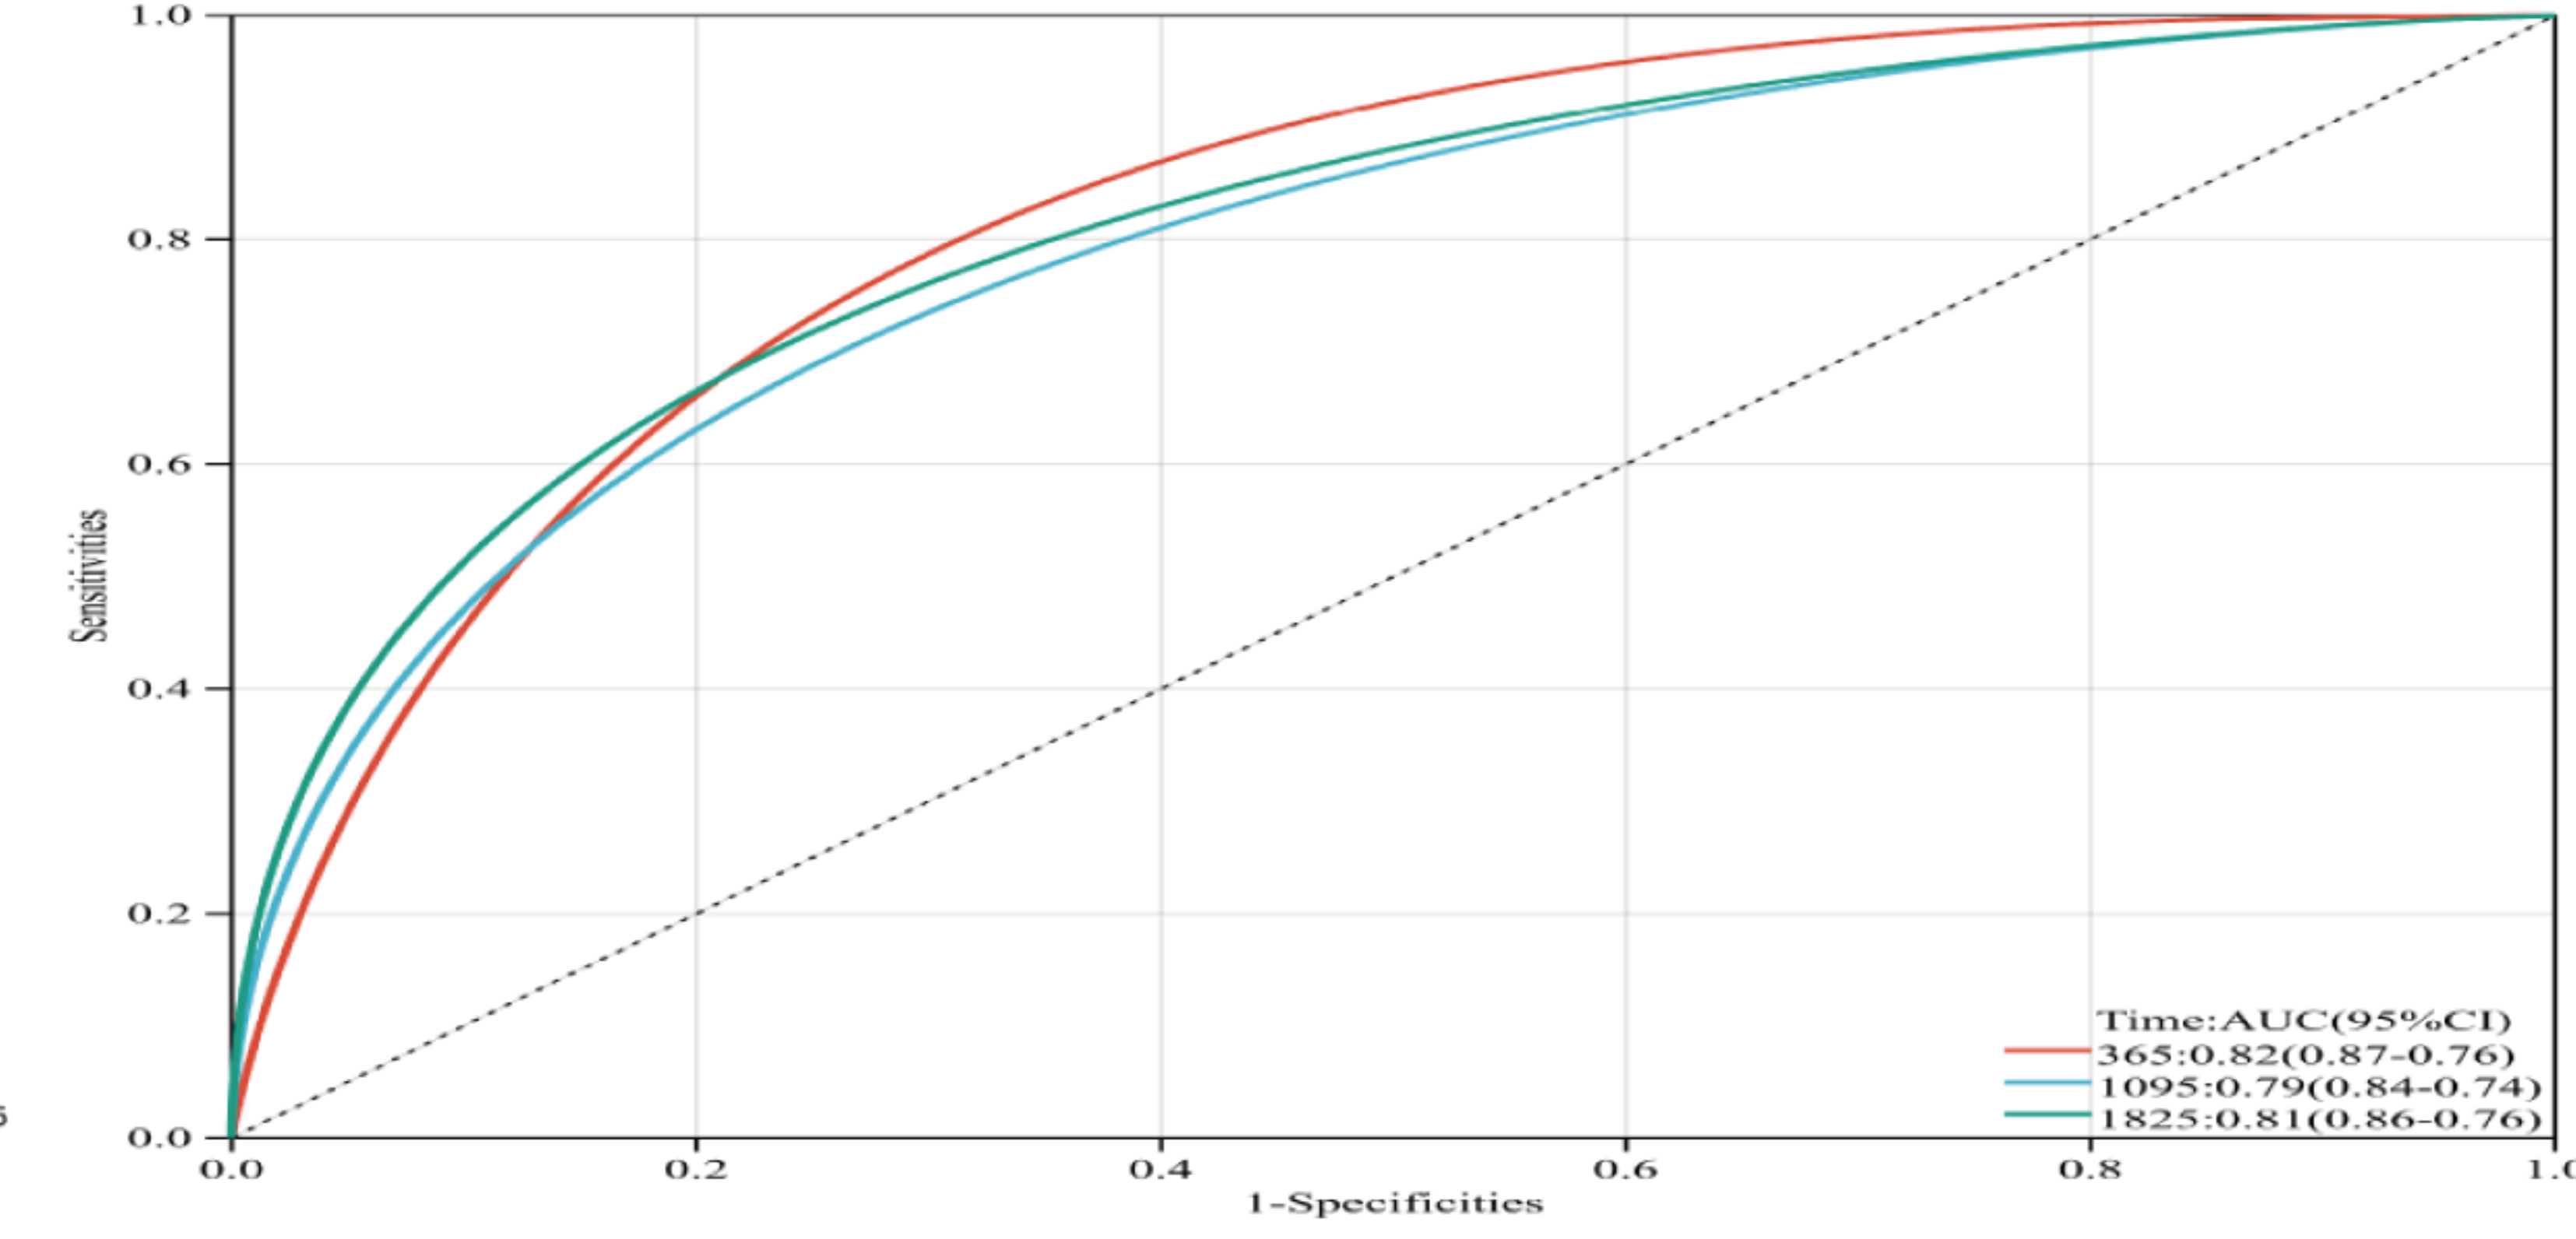



# HNSC

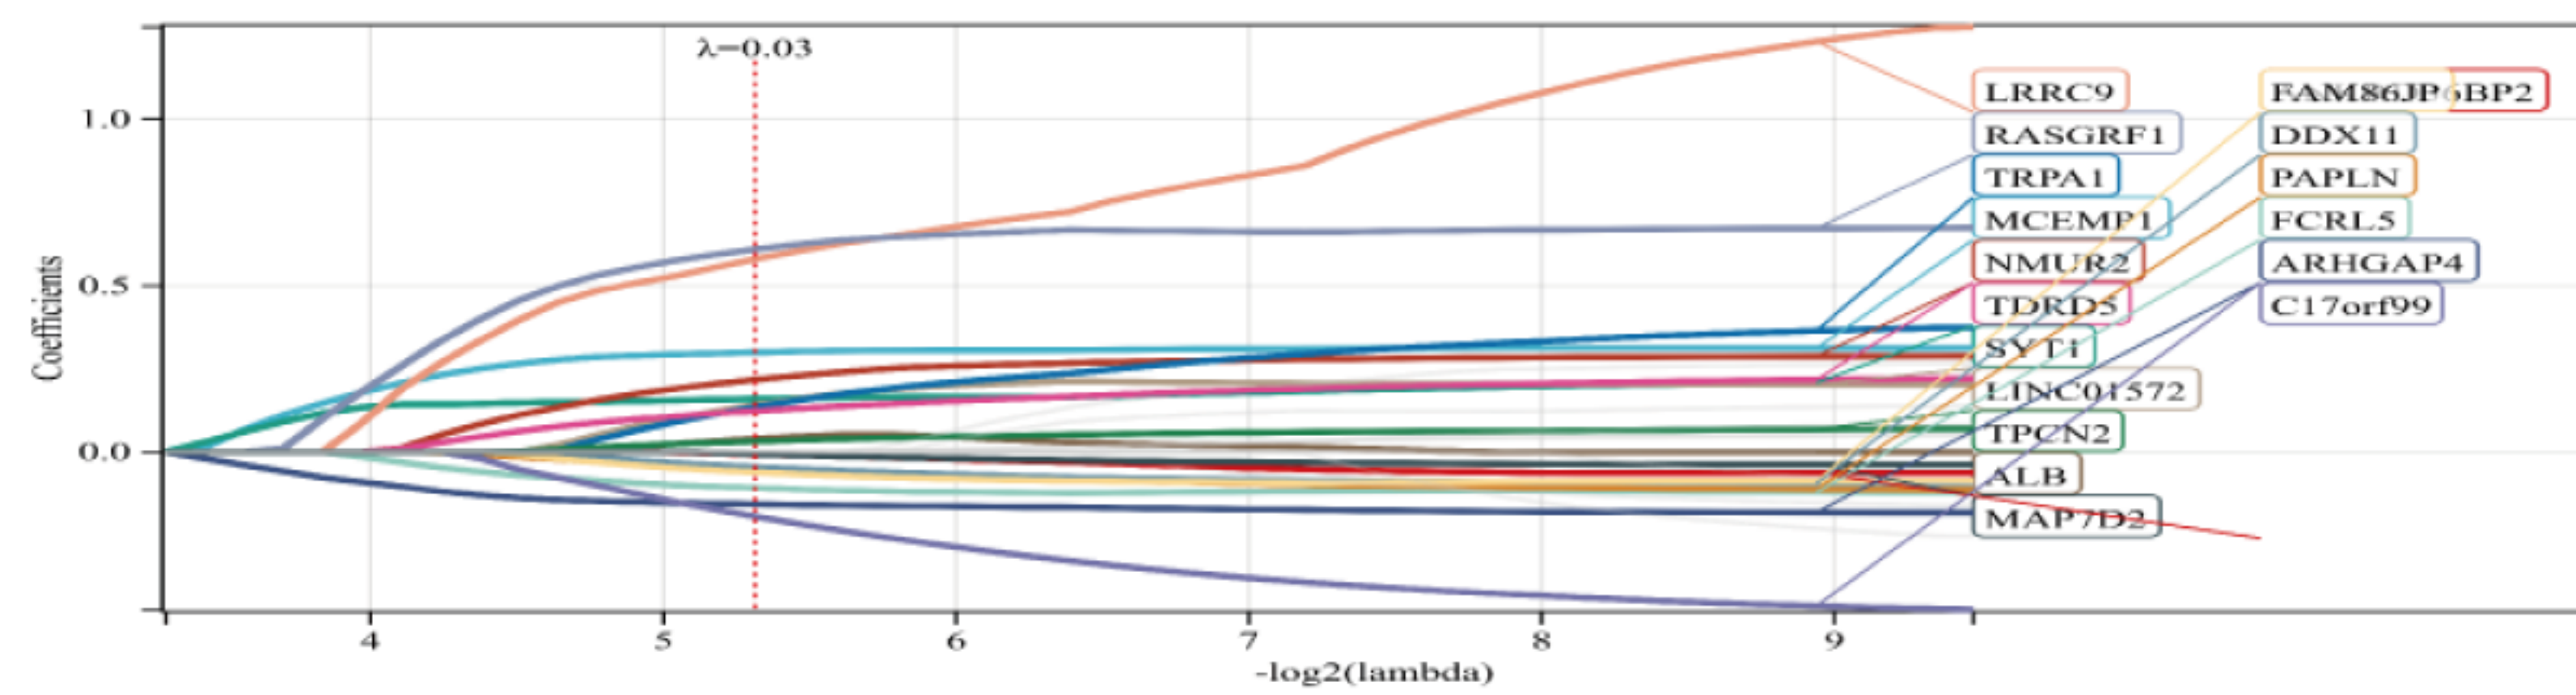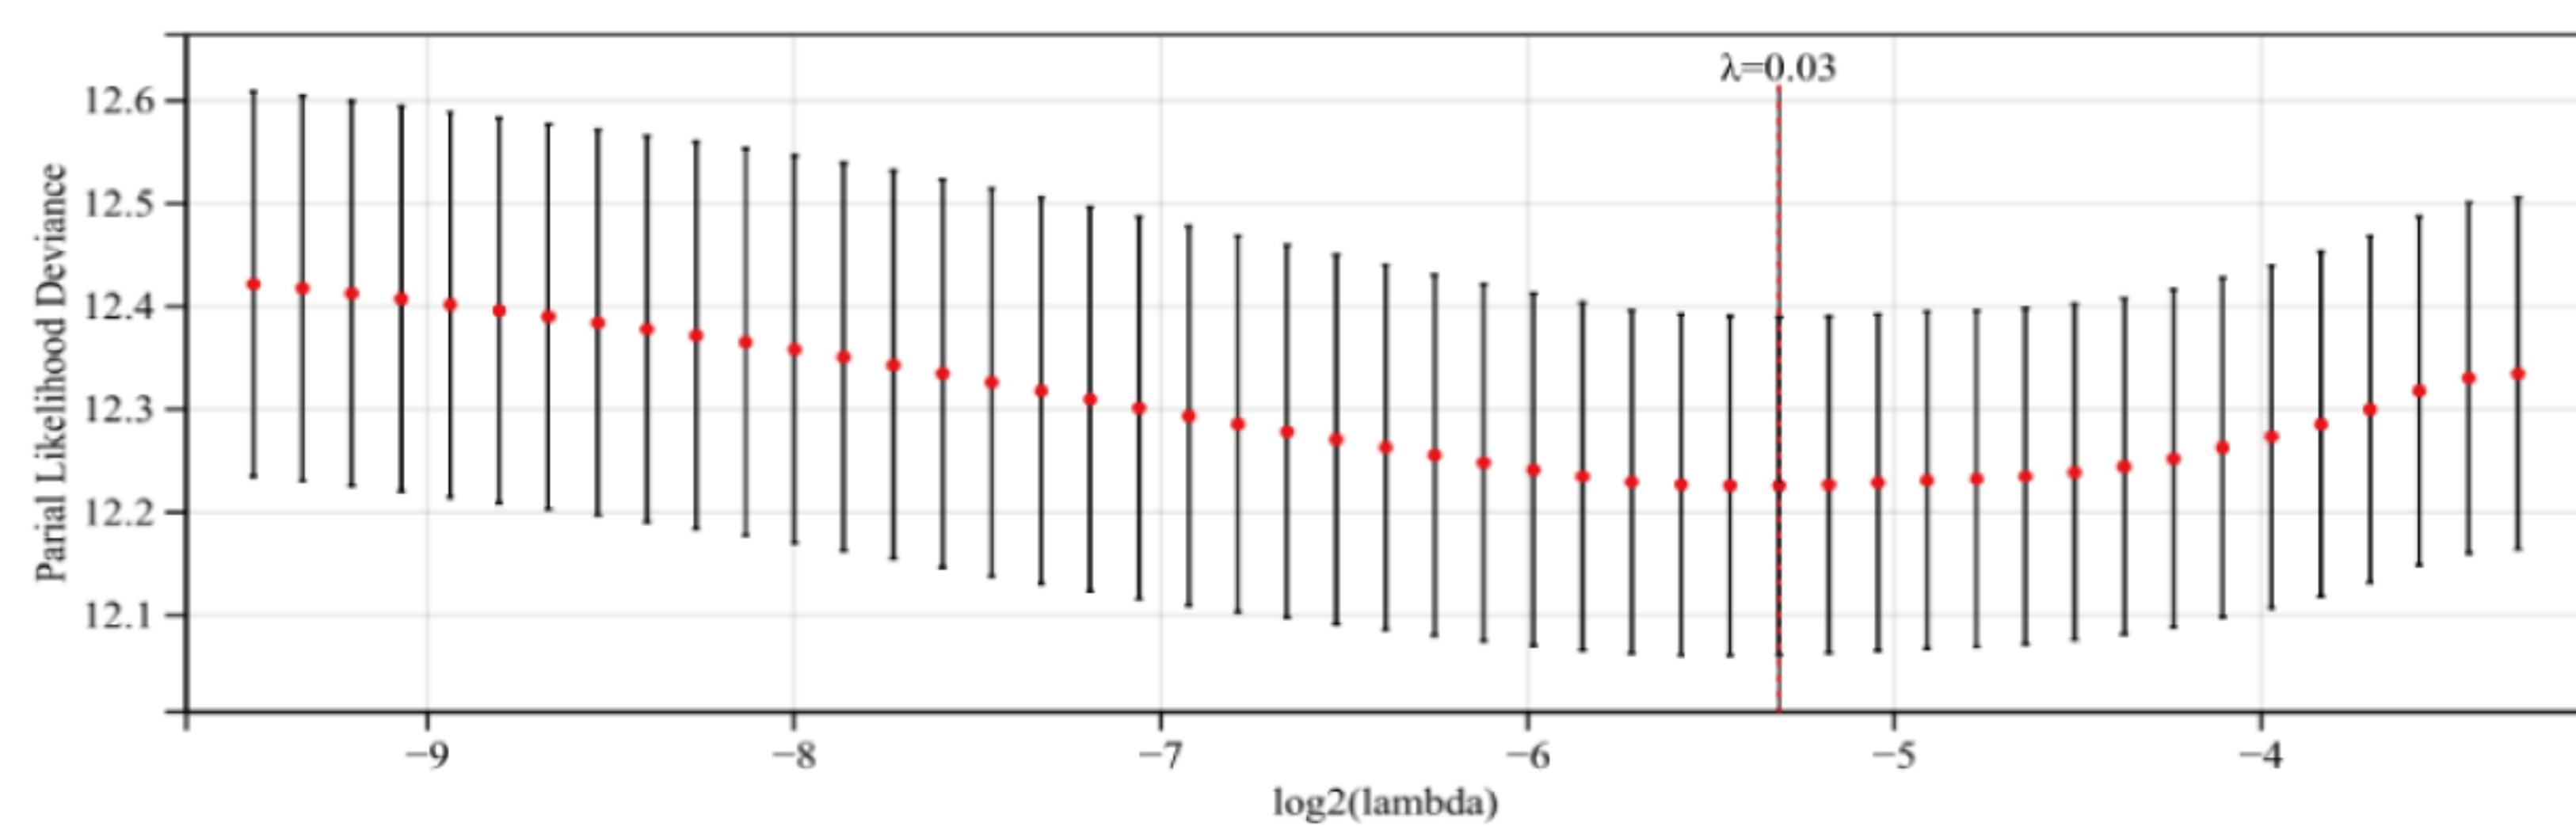

| Features | p-value | Hazard Ratio(95%CI) |
|----------|---------|---------------------|
| RASGRF1  | 0.02    | 2.12(1.13-3.98)     |
| TDRD5    | 0.03    | 1.22(1.02-1.45)     |
| MCEMP1   | 0.03    | 1.38(1.03-1.86)     |
| ARHGAP4  | 0.04    | 0.84(0.71-0.99)     |

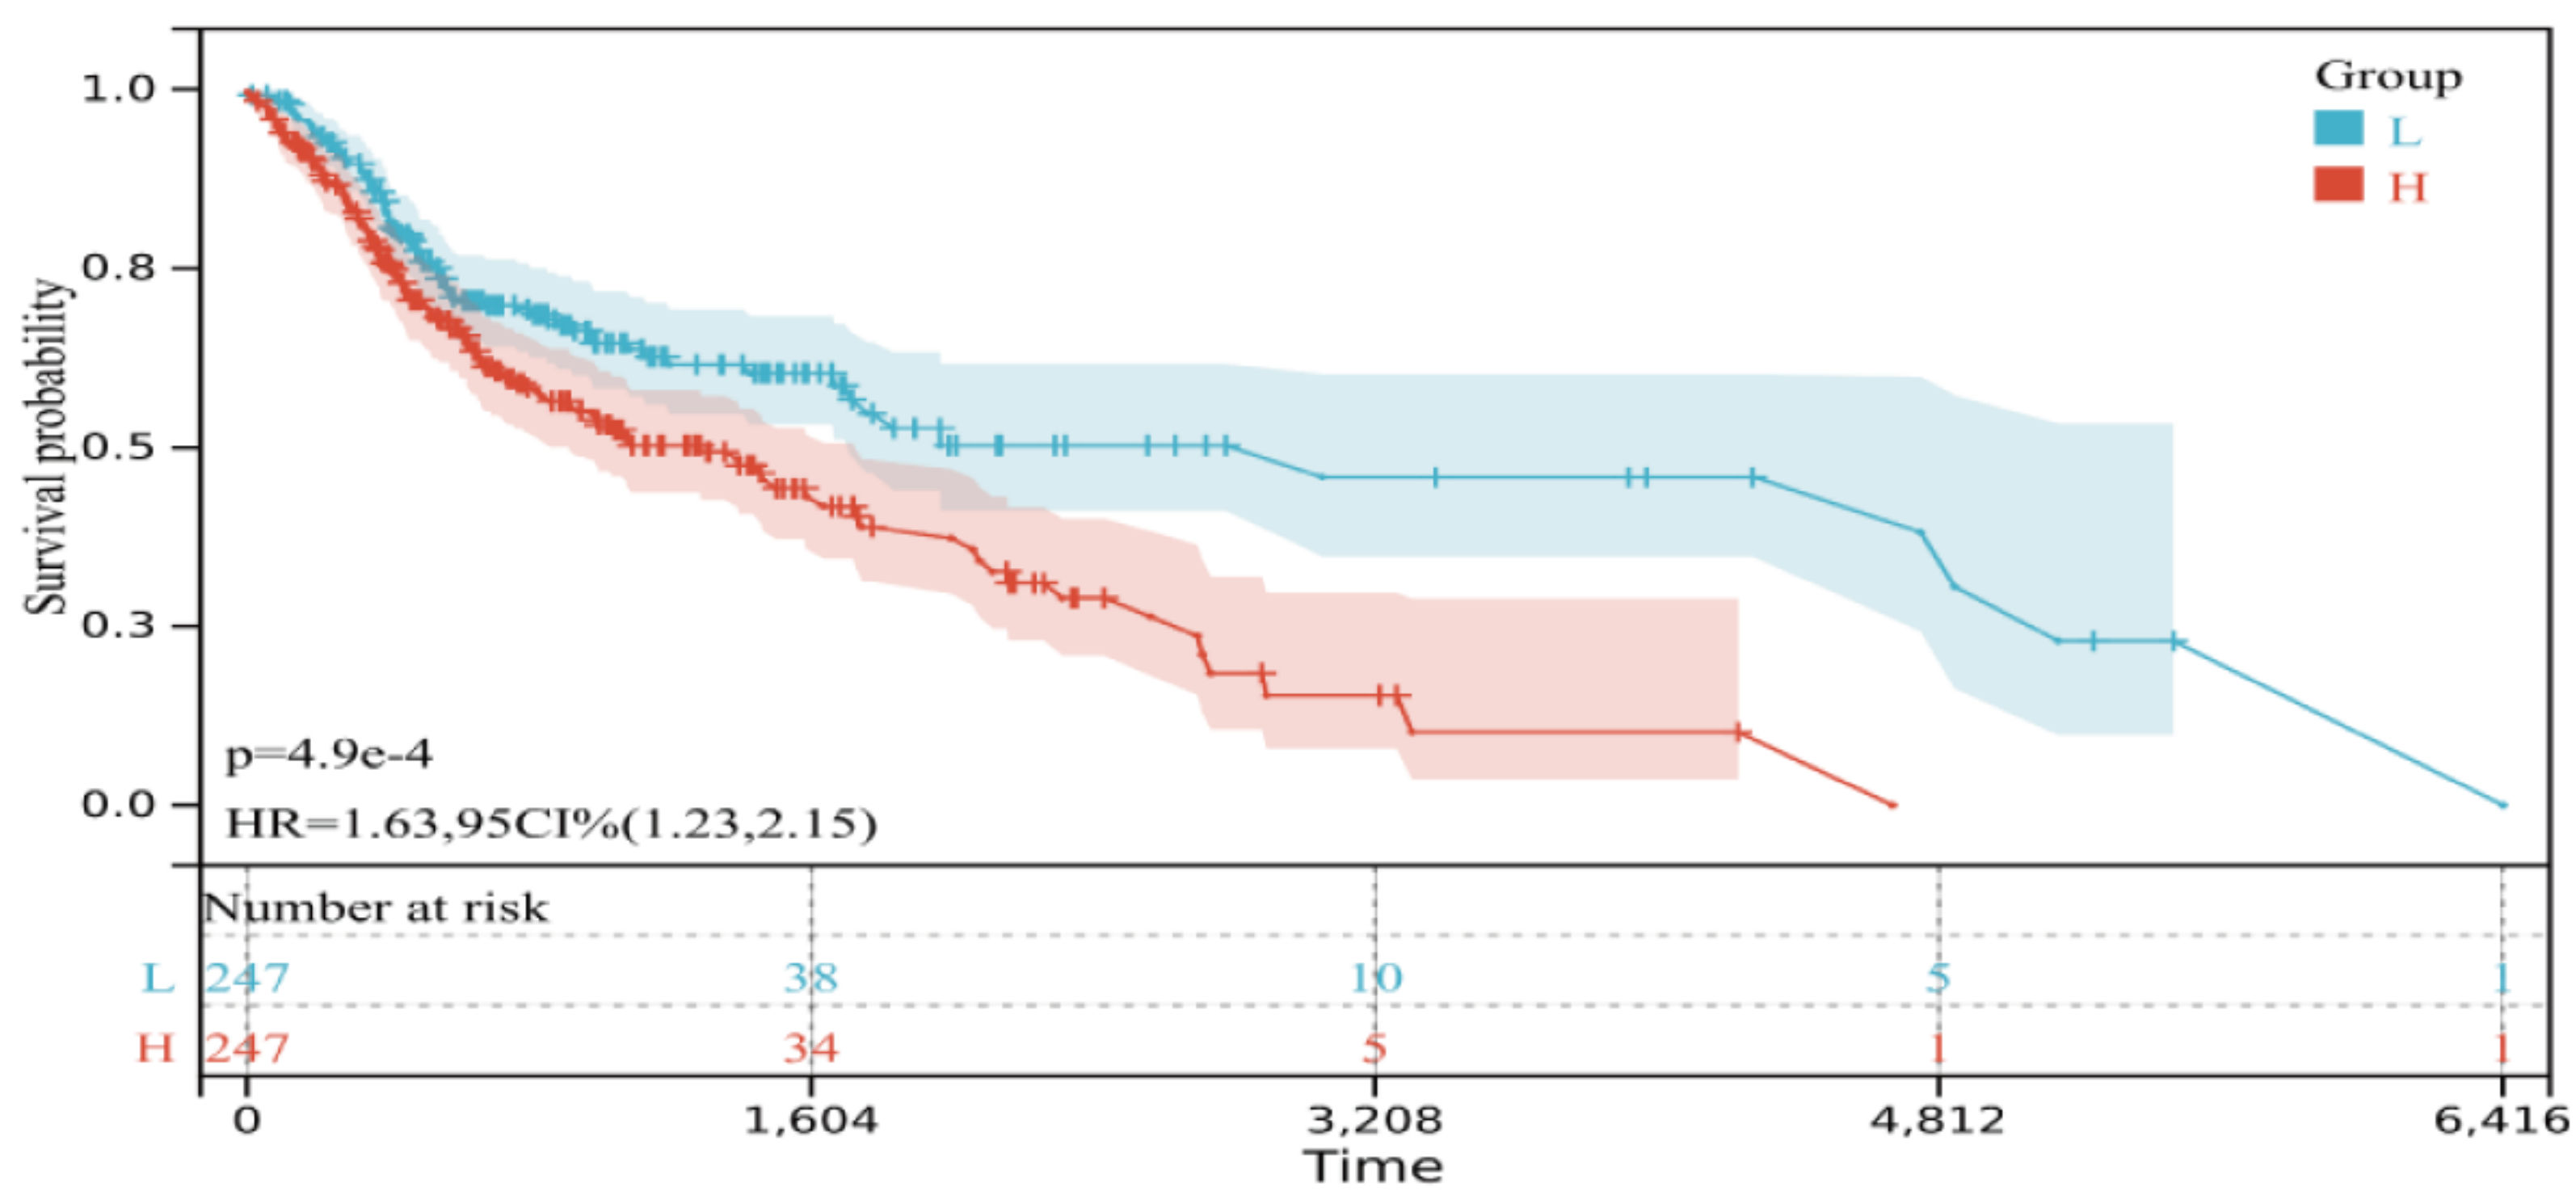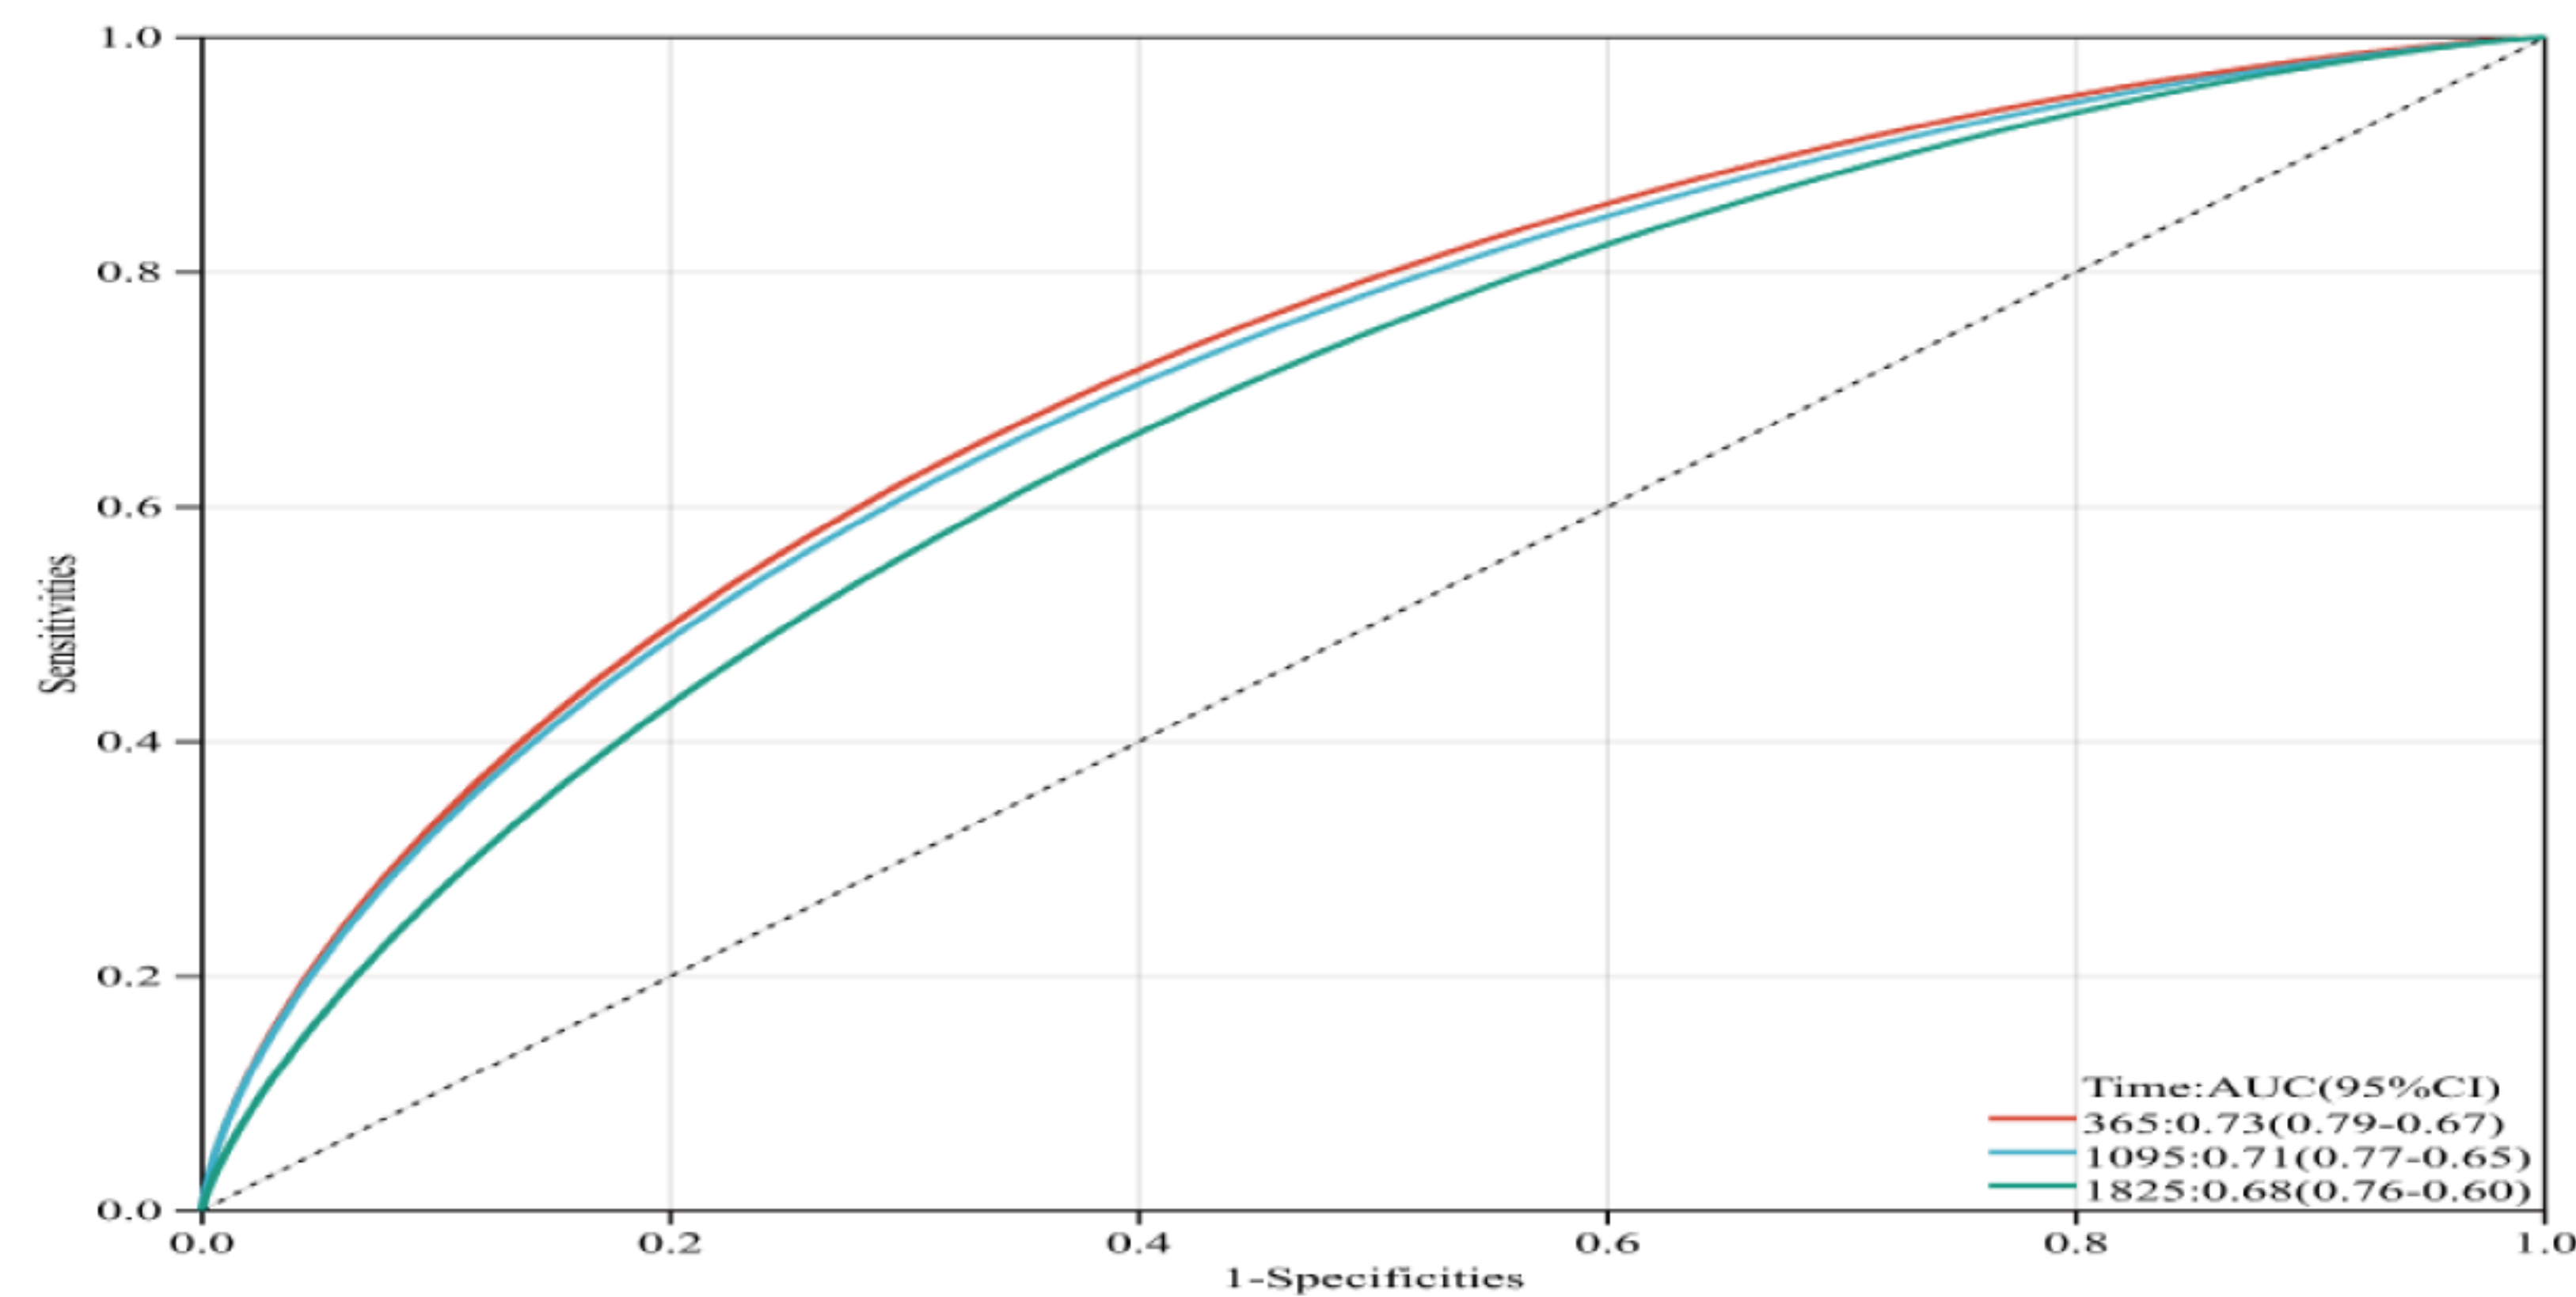

Supplement: 13100_2023_300_MOESM2_ESM.pdf [file 13100_2023_300_MOESM2_ESM.pdf]
