# Supplementary material for: Pan cancer characterization of genes whose expression has been associated with LINE-1 antisense promoter activity
Source: Mob DNA. 2023 Sep 18;14:13. doi: 10.1186/s13100-023-00300-x (PMC10506190; doi:10.1186/s13100-023-00300-x)
Supplement: Supplementary file 4 — Additional file 4. Table S1. L1 ASP-associated genes were frequently dysregulated in pan-cancer. [file 13100_2023_300_MOESM4_ESM.xlsx]

## Sheet: Table S1
Table S1. L1 ASP-associated genes were frequently dysregulated in pan-cancer
L1 ASP-driven genes（903）		BLCA							BRCA							CESC							CHOL							COAD							ESCA							GBM
gene id	gene name	gene name	baseMean	log2FoldChange	lfcSE	stat	pvalue	padj	gene name	baseMean	log2FoldChange	lfcSE	stat	pvalue	padj	gene name	baseMean	log2FoldChange	lfcSE	stat	pvalue	padj	gene name	baseMean	log2FoldChange	lfcSE	stat	pvalue	padj	gene name	baseMean	log2FoldChange	lfcSE	stat	pvalue	padj	gene name	baseMean	log2FoldChange	lfcSE	stat	pvalue	padj	gene name	baseMean	log2FoldChange	lfcSE	stat	pvalue
ENSG00000240602	AADACP1	PAFAH1B1	4548.36	-0.617052	0.100583	-6.13473	8.53043e-10	1.56753e-08	HECW1	40.1233	-0.551324	0.147876	-3.72828	0.000192788	0.000433984	MSL3	2118.87	0.867458	0.239937	3.61536	0.000299925	0.0030621	DVL2	1116.34	0.853789	0.174277	4.89902	9.63151e-07	6.40359e-06	HECW1	35.4627	1.40226	0.220102	6.37098	1.87821e-10	9.08437e-10	CAMK1G	39.6151	1.5301	0.37557	4.07406	4.62007e-05	0.000727319	HECW1	276.489	-4.09405	0.724771	-5.64874	1.61627e-08
ENSG00000008311	AASS	SPAG9	4240.78	-0.643144	0.152111	-4.22812	2.3565e-05	0.000155955	MAD1L1	21.6236	0.554166	0.114681	4.83224	1.35007e-06	3.77417e-06	NCAPD2	8757.13	2.16249	0.322181	6.71203	1.91941e-11	1.58286e-09	RHBDF1	2219.77	2.26706	0.254166	8.9196	4.6797e-19	2.03145e-17	MSL3	1034.6	0.38354	0.0654964	5.85589	4.7445e-09	2.00239e-08	AASS	1022.1	-1.04388	0.304183	-3.43177	0.000599658	0.00554603	DVL2	1924.13	0.648533	0.195737	3.31329	0.000922044
ENSG00000141338	ABCA8	AASS	649.352	-0.910456	0.28046	-3.24629	0.0011692	0.00461164	FARP2	2190.32	0.207641	0.0563136	3.68722	0.000226713	0.000506135	RNF216	2419.18	-0.90883	0.23511	-3.86555	0.000110838	0.00134521	CYTH3	807.338	0.921575	0.233657	3.94414	8.00864e-05	0.000357245	FARP2	2272.33	-0.209688	0.0644281	-3.25461	0.0011355	0.00245247	NCAPD2	13846	1.14859	0.237538	4.83538	1.32889e-06	3.88254e-05	PAFAH1B1	7388.83	-1.64681	0.155654	-10.5799	3.692e-26
ENSG00000154258	ABCA9	CRY1	801.124	-0.51489	0.14149	-3.63905	0.000273641	0.00132467	PAFAH1B1	7278.73	-0.448706	0.0452343	-9.9196	3.42132e-23	2.65874e-22	GABRA3	182.084	6.55691	1.54321	4.24887	2.14848e-05	0.000345266	AASS	1962.63	-3.70281	0.440175	-8.41215	4.02577e-17	1.38193e-15	PAFAH1B1	3115.86	-0.710729	0.0648091	-10.9665	5.53767e-28	1.00981e-26	NISCH	5893.23	-0.737174	0.171653	-4.29457	1.75036e-05	0.000323977	RHBDF1	1345.43	1.14769	0.316411	3.6272	0.000286508
ENSG00000231749	ABCA9-AS1	NCAPD2	6083.6	1.13461	0.18031	6.29252	3.12353e-10	6.3204e-09	RHBDF1	3163.61	0.691283	0.06888	10.036	1.0584e-23	8.44466e-23	DDX11	2864.79	1.90928	0.370143	5.15822	2.49315e-07	7.8917e-06	CRY1	684.453	-0.877394	0.224405	-3.90988	9.23428e-05	0.00040602	RHBDF1	1693	0.822766	0.114701	7.17311	7.33125e-13	4.43987e-12	GABRA3	359.364	4.05328	0.720683	5.62423	1.86341e-08	1.02897e-06	CAMK1G	289.229	-4.31322	0.796399	-5.41591	6.09792e-08
ENSG00000115657	ABCB6	IDS	222.357	-0.772493	0.187986	-4.10931	3.96844e-05	0.000246655	CAMK1G	23.102	0.919804	0.14601	6.29961	2.98389e-10	1.11401e-09	DNAH5	266.992	3.88979	1.0178	3.82174	0.000132513	0.00156346	RANBP9	1099.98	-0.580589	0.171538	-3.3846	0.000712809	0.00256665	CDK11A	77.0979	0.774897	0.151963	5.09925	3.41003e-07	1.18254e-06	DDX11	2908.78	1.00509	0.189984	5.29041	1.22044e-07	5.12159e-06	CRY1	1816.08	0.867733	0.237706	3.65044	0.000261794
ENSG00000101986	ABCD1	MKS1	847.294	0.703499	0.124596	5.64625	1.63981e-08	2.28677e-07	CYTH3	2569.53	-0.679169	0.0802701	-8.46105	2.6499e-17	1.51986e-16	FSTL4	468.257	5.1576	1.25897	4.09669	4.19102e-05	0.000604161	METTL13	1913.85	0.6905	0.1814	3.8065	0.000140947	0.000596606	SPAG9	2587.14	-0.519333	0.0878477	-5.91174	3.38518e-09	1.45085e-08	AGPS	5224.47	0.554127	0.169971	3.26013	0.00111362	0.00899265	NCAPD2	3294.37	0.928779	0.248175	3.74243	0.000182249
ENSG00000131969	ABHD12B	RNF216	2488.66	-0.420414	0.122463	-3.43299	0.000596971	0.00259067	SPAG9	6039.79	-0.369469	0.0733905	-5.03429	4.79618e-07	1.39679e-06	MTMR1	3362.35	1.83047	0.398782	4.59014	4.42938e-06	9.00153e-05	NCAPD2	2204.72	2.07383	0.221014	9.38323	6.39797e-21	3.59888e-19	METTL13	1831.89	0.363773	0.0675301	5.38682	7.17133e-08	2.67468e-07	MYOM2	136.191	-2.06758	0.466458	-4.43251	9.31422e-06	0.000196103	NISCH	5857.55	-1.81303	0.216946	-8.35708	6.42882e-17
ENSG00000154175	ABI3BP	GABRA3	355.1	1.52183	0.476576	3.19325	0.00140681	0.00538369	AASS	754.77	-1.74431	0.0958605	-18.1964	5.51284e-74	2.80151e-72	SLC9A7	1939.05	1.81835	0.493515	3.68449	0.000229163	0.00245513	CD4	3163.35	-2.42542	0.377504	-6.42488	1.31969e-10	1.73415e-09	NCAPD2	4443.95	0.66016	0.0783582	8.4249	3.61043e-17	3.13078e-16	TNC	53214.7	2.56004	0.604305	4.23634	2.27189e-05	0.000403391	IDS	685.482	-2.53451	0.373507	-6.78571	1.1552e-11
ENSG00000278540	ACACA	DDX11	1785.67	1.28039	0.169136	7.5702	3.72637e-14	1.5116e-12	RANBP9	3191.98	0.425621	0.0634592	6.707	1.98668e-11	8.03291e-11	SYT1	243.667	-4.76958	1.38956	-3.43244	0.000598187	0.0053266	MKS1	566.056	0.73282	0.171603	4.27042	1.95102e-05	0.000100382	NISCH	2271.85	-0.251758	0.0851347	-2.95717	0.00310478	0.00622595	ADAM28	2203.04	-2.0833	0.514541	-4.04884	5.14711e-05	0.000793795	CD4	3787.12	1.64938	0.394153	4.18462	2.85638e-05
ENSG00000177646	ACAD9	CNTN1	870.479	-3.18767	0.564437	-5.64753	1.62774e-08	2.27076e-07	METTL13	3380.86	0.596031	0.0521525	11.4286	3.00864e-30	3.28203e-29	MCM2	5559.53	4.02759	0.543685	7.40795	1.28269e-13	1.43556e-11	LARS2	760.256	-1.32322	0.161411	-8.19784	2.44751e-16	7.65568e-15	IDS	175.916	-0.684961	0.11518	-5.9469	2.73266e-09	1.1839e-08	COL11A1	3061.19	6.1108	0.762037	8.01903	1.06585e-15	3.5265e-13	MKS1	834.214	1.03344	0.162639	6.35417	2.09552e-10
ENSG00000114331	ACAP2	DERA	1481.92	0.503339	0.159303	3.15962	0.00157975	0.00594788	CD9	24136	1.00419	0.0713383	14.0764	5.30561e-45	1.04662e-43	GTSE1	1580.2	5.51249	0.409289	13.4685	2.39779e-41	1.59871e-38	LTF	672.729	3.88252	0.871972	4.45258	8.48454e-06	4.70927e-05	CD4	1225	-1.04441	0.16709	-6.25057	4.08958e-10	1.91906e-09	CACNB1	627.274	1.01423	0.284715	3.56227	0.000367665	0.00378282	GABRA3	507.18	-2.93373	0.812232	-3.61193	0.000303921
ENSG00000131473	ACLY	RNASET2	2076.9	0.894295	0.276153	3.2384	0.00120203	0.00472079	NCAPD2	6052.07	0.87717	0.0874572	10.0297	1.12843e-23	8.98761e-23	ITM2A	497.019	-4.09923	0.730888	-5.60856	2.04015e-08	8.47905e-07	DDX11	991.523	1.0798	0.258656	4.17466	2.98428e-05	0.000147297	MKS1	506.77	0.621856	0.0687467	9.0456	1.48846e-19	1.54135e-18	NUCB2	3895.33	-1.2929	0.242601	-5.32932	9.85793e-08	4.29551e-06	LTF	26442.2	8.34062	1.08995	7.65231	1.97395e-14
ENSG00000103740	ACSBG1	CUL3	1821.04	-0.671365	0.140182	-4.78925	1.67406e-06	1.47123e-05	NISCH	5671.85	-0.581216	0.0557414	-10.427	1.86657e-25	1.63153e-24	RSBN1	1051.37	-0.889895	0.276284	-3.22095	0.00127767	0.00977741	CPS1	40763	-6.94566	0.907871	-7.65049	2.00217e-14	4.70581e-13	LARS2	1639.82	0.30381	0.083927	3.61993	0.000294688	0.000699057	POLB	1465.57	0.89087	0.243874	3.65299	0.000259206	0.00288109	DDX11	892.545	1.26789	0.341013	3.71802	0.00020079
ENSG00000068366	ACSL4	MYOM2	73.0139	-2.76663	0.328325	-8.4265	3.5615e-17	2.58777e-15	IDS	373.72	-0.268476	0.0801481	-3.34976	0.000808829	0.00169333	PGR	736.197	-5.2198	1.40353	-3.71905	0.000199971	0.00219415	DERA	1793.8	-1.63536	0.21325	-7.66874	1.73689e-14	4.11117e-13	LTF	197.612	-1.01766	0.248987	-4.0872	4.36619e-05	0.000116861	MCM2	4107.44	1.90881	0.322334	5.92185	3.18332e-09	2.16135e-07	CNTN1	5952.03	-1.88277	0.59919	-3.14218	0.00167694
ENSG00000072110	ACTN1	CTNNA1	16950.2	-0.357732	0.111207	-3.21681	0.00129625	0.00503052	MKS1	1104.67	0.39309	0.0637665	6.16453	7.06945e-10	2.57288e-09	ADD1	7755.88	-1.55001	0.24317	-6.3742	1.83925e-10	1.27069e-08	UBR2	2299.6	-0.631306	0.155997	-4.04691	5.18974e-05	0.000242422	DDX11	1093.64	1.1702	0.109745	10.663	1.51686e-26	2.53662e-25	GTSE1	1623.53	1.88499	0.24227	7.78055	7.22107e-15	2.01174e-12	NRXN3	677.359	-4.59127	0.615757	-7.45631	8.89824e-14
ENSG00000115091	ACTR3	GINM1	1776	-0.644808	0.114661	-5.6236	1.87022e-08	2.57222e-07	LARS2	1658.01	0.295959	0.0480526	6.15906	7.31784e-10	2.65923e-09	ARHGAP4	4597.02	2.32556	0.607196	3.83	0.000128142	0.00151875	FUT8	590.995	1.32824	0.421498	3.15124	0.00162579	0.00532526	CNTN1	59.506	-2.71195	0.327932	-8.26987	1.34102e-16	1.1121e-15	ITM2A	677.553	-1.76422	0.407032	-4.33436	1.46186e-05	0.000280811	RNF10	6613.24	-0.473438	0.120739	-3.92118	8.81172e-05
ENSG00000123612	ACVR1C	RASGRF1	162.511	1.78509	0.432748	4.12502	3.70704e-05	0.000232193	GABRA3	52.8255	4.22597	0.383112	11.0306	2.71937e-28	2.69567e-27	VRK1	1777.01	1.48688	0.359678	4.13393	3.56614e-05	0.000528884	DNAH5	461.661	1.84792	0.497254	3.71625	0.000202205	0.000828752	NRXN3	239.466	-0.859269	0.275691	-3.11678	0.00182839	0.00380828	MPP4	14.9474	1.62512	0.492028	3.3029	0.0009569	0.00799089	DERA	1857.38	1.72791	0.267714	6.45429	1.08727e-10
ENSG00000148848	ADAM12	COL11A1	1812.99	5.72888	0.562718	10.1807	2.41774e-24	7.53086e-22	DDX11	1371.46	0.709775	0.0858808	8.26465	1.40101e-16	7.73359e-16	GINS1	2403.88	4.27962	0.34678	12.341	5.44577e-35	2.3702e-32	TNC	6107.56	2.57256	0.655638	3.92375	8.71811e-05	0.000385196	CPS1	269.189	2.45175	0.367087	6.67894	2.40677e-11	1.26118e-10	C1QTNF3	347.983	-1.47111	0.435005	-3.38181	0.000720086	0.00639547	UBR2	1503.66	-0.600808	0.141498	-4.24606	2.17559e-05
ENSG00000259158	ADAM20P1	NCKAP1	8229.1	-0.547701	0.144016	-3.80306	0.00014292	0.000755005	MAMLD1	450.139	-0.681897	0.131741	-5.17604	2.26643e-07	6.78644e-07	PABPC1L	1663.74	3.26175	0.535277	6.09359	1.10408e-09	6.18934e-08	ADAM28	1151.7	3.54141	0.510285	6.94005	3.9195e-12	6.602e-11	RNF10	5012.28	-0.424747	0.0500022	-8.49456	1.98688e-17	1.7604e-16	ADD1	14206.2	-0.542753	0.154268	-3.51825	0.000434405	0.0042906	FUT8	1944.59	-0.831476	0.247456	-3.36009	0.000779172
ENSG00000042980	ADAM28	ME1	1073.65	-1.29117	0.339408	-3.80418	0.000142278	0.000752287	CNTN1	897.754	-0.903061	0.16445	-5.49141	3.98744e-08	1.27281e-07	CDK16	8679.03	1.22624	0.295744	4.14628	3.37913e-05	0.000503773	CTNNA1	17694.2	0.917641	0.191645	4.78824	1.68253e-06	1.06835e-05	DERA	1608.46	-0.713514	0.0901053	-7.91867	2.40068e-15	1.80284e-14	G2E3	2405.58	0.70709	0.188761	3.74596	0.000179703	0.00215434	CUL3	2444.76	-0.432569	0.133997	-3.2282	0.00124573
ENSG00000189007	ADAT2	SLC9A7	1230.56	1.02245	0.257904	3.96446	7.35626e-05	0.000422338	CPS1	356.35	-1.16112	0.159862	-7.2633	3.77769e-13	1.70654e-12	CEP152	659.457	2.02873	0.365331	5.55313	2.80598e-08	1.12588e-06	CNTLN	460.06	-2.21283	0.239677	-9.23255	2.64272e-20	1.36496e-18	UBR2	1919.15	-0.581746	0.0736984	-7.89361	2.9358e-15	2.18754e-14	UPRT	599.528	-1.19722	0.203336	-5.88789	3.91148e-09	2.57871e-07	MYOM2	551.191	-2.44914	0.329743	-7.4274	1.10753e-13
ENSG00000087274	ADD1	CACNB1	550.642	1.05907	0.239719	4.41796	9.96355e-06	7.26867e-05	RNF10	10704.1	0.135539	0.0388113	3.49225	0.00047897	0.00103082	CNTD2	102.486	3.90734	1.07544	3.63325	0.000279877	0.00288494	C12orf4	561.778	0.850141	0.143353	5.93039	3.0222e-09	3.16093e-08	RNASET2	2066.49	0.649306	0.126132	5.14783	2.63513e-07	9.26092e-07	HMGXB4	2799.35	0.617852	0.131763	4.68912	2.74379e-06	7.15905e-05	TNC	27279.8	3.78988	0.456222	8.3071	9.80703e-17
ENSG00000164199	ADGRV1	NUCB2	2054.46	-0.944264	0.166918	-5.65705	1.53998e-08	2.16103e-07	UBR2	4462.45	-0.18204	0.0535438	-3.39983	0.000674278	0.00142593	DNAH11	295.564	3.91397	1.08847	3.59584	0.000323351	0.00325188	FSTL4	54.9252	3.12134	0.829314	3.76377	0.000167374	0.000697439	FUT8	1588.4	0.892299	0.134465	6.63589	3.22542e-11	1.6744e-10	HIF1A	23975.7	0.977761	0.242527	4.03156	5.54086e-05	0.000843078	CNTLN	478.47	1.54867	0.339694	4.55903	5.13915e-06
ENSG00000196344	ADH7	EXOC5	2323.71	-0.487038	0.133581	-3.64601	0.000266349	0.00129448	RNASET2	1698.55	0.893567	0.094854	9.42045	4.49175e-21	3.15563e-20	CYP2C18	197.887	4.40826	1.2702	3.47052	0.000519451	0.00474855	ATP9A	3874.07	0.917579	0.292774	3.13409	0.00172391	0.00560115	CUL3	2026.16	-0.196573	0.052801	-3.72291	0.00019694	0.000479315	GINS1	1781.89	1.97272	0.258591	7.62872	2.37105e-14	5.81742e-12	SLC4A8	2194.29	-1.46545	0.285156	-5.1391	2.76051e-07
ENSG00000139154	AEBP2	POLB	1571.86	0.701726	0.197811	3.54746	0.000388964	0.00178579	FUT8	4375.55	1.03517	0.0972196	10.6477	1.78718e-26	1.63585e-25	KPNB1	13355.5	0.788785	0.206467	3.82039	0.000133238	0.00157143	GINM1	1265.09	-0.882297	0.2019	-4.36998	1.2426e-05	6.66805e-05	MYOM2	74.3022	-0.721796	0.179251	-4.02673	5.65587e-05	0.000148939	PABPC1L	2000.12	1.04235	0.291528	3.57546	0.000349616	0.00364665	FSTL4	126.473	-4.82328	0.738128	-6.53448	6.38319e-11
ENSG00000225623	AGBL4-IT1	ACTN1	15357.1	-1.51738	0.257575	-5.89103	3.83791e-09	6.18994e-08	MYOM2	133.939	-2.52316	0.152804	-16.5124	2.9864e-61	1.00263e-59	HDAC5	3629.03	-1.28964	0.361258	-3.56987	0.000357152	0.0035198	ATG5	1094.18	-0.918773	0.181629	-5.05853	4.2251e-07	3.00297e-06	FBXO42	837.765	-0.207109	0.0513831	-4.03069	5.56132e-05	0.000146595	VSIG1	4480.41	-2.92097	0.82699	-3.53205	0.000412356	0.00413045	ATP9A	6798.93	-2.51317	0.299366	-8.39498	4.65967e-17
ENSG00000187546	AGMO	CHFR	1847.86	0.384498	0.11609	3.31207	0.000926094	0.00377035	FBXO42	1919.34	-0.210338	0.0314474	-6.68855	2.25391e-11	9.07222e-11	PRKAR1A	9844.8	-0.981368	0.293334	-3.34557	0.000821143	0.00687098	RASGRF1	63.8023	3.05757	0.627465	4.8729	1.09974e-06	7.2256e-06	DNAH5	53.4834	2.30348	0.209337	11.0037	3.66914e-28	6.76258e-27	DHRS12	215.953	-0.718207	0.213824	-3.35887	0.000782611	0.00683306	RASGRF1	484.815	-4.88138	0.679942	-7.17911	7.01673e-13
ENSG00000160216	AGPAT3	NFATC3	674.248	-0.664802	0.19095	-3.48156	0.00049851	0.00221126	DNAH5	1097.44	0.520967	0.159334	3.26966	0.00107677	0.00221951	RCVRN	3.70838	-3.57774	0.969069	-3.69193	0.000222555	0.00239749	MTMR1	1223.26	0.45904	0.144697	3.17242	0.00151173	0.00499814	ADAM28	286.618	-1.43409	0.193266	-7.42028	1.1687e-13	7.60702e-13	TSC2	8999.18	-0.473697	0.13905	-3.40668	0.000657581	0.00595173	NCKAP1	9500.62	-0.767304	0.16225	-4.72916	2.25454e-06
ENSG00000018510	AGPS	MCM2	1841.94	1.87913	0.263633	7.12783	1.01963e-12	3.28087e-11	ADAM28	608.454	0.357593	0.117157	3.05224	0.00227138	0.00448477	TBC1D19	233.837	-1.51682	0.419482	-3.61594	0.000299256	0.00305964	NEO1	4481.98	1.76937	0.279127	6.33893	2.31363e-10	2.91218e-09	CTNNA1	15285.9	-0.439311	0.0650328	-6.75522	1.42615e-11	7.63836e-11	CEP152	865.277	0.681074	0.179696	3.79016	0.000150553	0.00187283	SNCAIP	1075.81	2.33976	0.431009	5.42855	5.68122e-08
ENSG00000146416	AIG1	ZNF532	1923	-0.670266	0.210918	-3.17785	0.00148373	0.0056338	CNTLN	609.133	-0.300442	0.0905024	-3.31971	0.000901106	0.00187682	KCTD10	3471.77	-1.31209	0.261905	-5.0098	5.44864e-07	1.51773e-05	CACNB1	211.747	2.61398	0.387806	6.74043	1.57915e-11	2.40348e-10	SLC4A8	132.047	1.26205	0.180167	7.00485	2.47256e-12	1.42345e-11	STK3	2356.09	0.905922	0.183558	4.93535	8.00085e-07	2.53197e-05	PKN2	1995.23	0.706724	0.170881	4.13578	3.53757e-05
ENSG00000170776	AKAP13	GTSE1	908.055	2.36864	0.218906	10.8203	2.75832e-27	1.45582e-24	C12orf4	1280.71	0.21144	0.0536903	3.93814	8.21144e-05	0.000192852	TCERG1	3730.46	0.909818	0.26952	3.3757	0.000736289	0.00627327	POLR1A	1778.55	0.912711	0.157931	5.77916	7.50744e-09	7.35343e-08	COL23A1	36.8271	-1.26833	0.176905	-7.16955	7.52455e-13	4.55135e-12	GDAP1	994.061	1.0739	0.308119	3.48534	0.000491516	0.00472815	SLC9A7	1256.41	-1.84521	0.309871	-5.95478	2.60427e-09
ENSG00000187134	AKR1C1	ITM2A	504.079	-2.64607	0.345165	-7.66609	1.77314e-14	7.62231e-13	SLC4A8	1654.94	1.81527	0.162493	11.1714	5.63045e-29	5.78479e-28	SMC4	5858.19	4.00468	0.524178	7.63993	2.17342e-14	2.69203e-12	NFATC3	569.432	-0.728535	0.207405	-3.51262	0.000443704	0.00167403	FSTL4	37.2274	1.16965	0.332993	3.51253	0.000443868	0.00102471	MET	11436.9	1.01056	0.309533	3.26478	0.00109551	0.00887547	CACNB1	956.387	-3.29166	0.349052	-9.43029	4.08969e-21
ENSG00000151632	AKR1C2	EPHA6	24.4833	-2.85851	0.562373	-5.08294	3.7164e-07	3.83769e-06	COL23A1	111.465	-0.919437	0.145864	-6.30337	2.91238e-10	1.08839e-09	NPHP3	425.129	-1.1315	0.338401	-3.34366	0.000826805	0.00689268	MCM2	658.576	2.48228	0.291005	8.53002	1.46318e-17	5.35203e-16	GINM1	922.132	-0.965018	0.0803406	-12.0116	3.08845e-33	7.97669e-32	USP42	2424.25	0.490462	0.143814	3.41039	0.000648693	0.00588902	RHOA	26811.5	0.870958	0.165118	5.27475	1.32935e-07
ENSG00000117020	AKT3	CNOT4	943.839	-0.369487	0.087144	-4.23995	2.23566e-05	0.000148787	FSTL4	276.06	1.89527	0.171075	11.0786	1.59433e-28	1.59965e-27	ECT2	6100.41	3.67816	0.413735	8.89014	6.10297e-19	1.12499e-16	PPP2R2C	891.733	6.54479	0.817214	8.00867	1.15957e-15	3.28727e-14	ATG5	1723.4	-0.260114	0.0721827	-3.60356	0.000313894	0.000741546	POU6F2	384.844	2.92424	0.680718	4.29582	1.74046e-05	0.00032256	SYT1	4104.29	-5.15939	0.806447	-6.39768	1.57754e-10
ENSG00000163631	ALB	PGR	75.6608	-3.42489	0.380495	-9.00114	2.23396e-19	2.51162e-17	ATP9A	9492.6	-0.500022	0.0915679	-5.46067	4.74336e-08	1.50458e-07	PLXNA1	8829.46	1.728	0.484049	3.56988	0.000357144	0.0035198	ZNF532	1687.98	2.29489	0.313884	7.31128	2.64612e-13	5.35446e-12	RASGRF1	56.476	1.08225	0.255726	4.23206	2.31562e-05	6.44622e-05	SMC3	7410.06	0.542581	0.144446	3.75628	0.000172457	0.0020852	ACSL4	1945.37	-1.41766	0.295013	-4.80541	1.54436e-06
ENSG00000189366	ALG1L	GSK3B	3186.94	0.372952	0.103241	3.61242	0.000303352	0.00144566	GINM1	2757.64	-0.490681	0.0474305	-10.3453	4.39714e-25	3.78012e-24	AKT3	827.352	-2.86582	0.707487	-4.0507	5.1065e-05	0.000713448	GTSE1	300.342	3.935	0.419823	9.373	7.04982e-21	3.9589e-19	COL11A1	1380.95	6.52879	0.280003	23.3168	2.99119e-120	3.19459e-117	KPNB1	19297.7	0.476788	0.125883	3.78754	0.000152146	0.00188515	NUCKS1	15954.1	-0.564507	0.184556	-3.05873	0.00222277
ENSG00000159063	ALG8	SLCO1A2	103.999	2.50991	0.646938	3.87968	0.000104595	0.000575545	RASGRF1	216.601	1.35237	0.18663	7.2463	4.28301e-13	1.92714e-12	STX12	2526.42	-0.897123	0.271856	-3.3	0.000966865	0.00781901	ZNF638	4128.48	-0.336952	0.112045	-3.00729	0.00263588	0.00809287	MTMR1	1217.75	0.445962	0.0689578	6.46717	9.98553e-11	4.96962e-10	FBXO9	3579.67	-0.558203	0.162826	-3.42821	0.000607576	0.00560725	CLEC2D	260.782	1.71969	0.318813	5.39404	6.88901e-08
ENSG00000116127	ALMS1	NFX1	1993.48	-0.512708	0.116596	-4.39729	1.09611e-05	7.91636e-05	COL11A1	12083.7	6.17712	0.186988	33.0348	2.57192e-239	1.29713e-235	CHRNB4	215.86	5.36258	1.16374	4.60805	4.06463e-06	8.36144e-05	ARHGAP15	258.486	-1.16117	0.345599	-3.35986	0.000779814	0.0027775	SNCAIP	185.384	1.14363	0.251784	4.5421	5.56974e-06	1.67296e-05	NME5	29.6365	-2.56729	0.499342	-5.14136	2.72762e-07	1.02243e-05	SIDT1	344.952	-2.41584	0.555569	-4.3484	1.37132e-05
ENSG00000159461	AMFR	ADD1	10451.9	-0.930794	0.101676	-9.15452	5.45994e-20	7.00956e-18	MTMR1	2602.04	0.245457	0.0489815	5.01121	5.40884e-07	1.56847e-06	SPP1	7835.99	3.30705	1.00519	3.28999	0.00100192	0.00804645	FMO4	845.863	-2.72371	0.353673	-7.70121	1.3478e-14	3.23598e-13	IPO5	8367.77	1.03271	0.0884181	11.6798	1.61607e-31	3.70208e-30	DROSHA	5205.91	0.575176	0.165958	3.46579	0.000528667	0.00501366	MCM2	1700.78	2.54983	0.40228	6.33844	2.32104e-10
ENSG00000166025	AMOTL1	STRN4	5717.92	0.461258	0.101834	4.52951	5.91202e-06	4.56631e-05	SNCAIP	237.994	-1.10243	0.143093	-7.70428	1.3158e-14	6.46521e-14	GLE1	2674.82	0.900086	0.255173	3.52736	0.000419724	0.00400149	RABL2B	702.694	1.05898	0.178168	5.94375	2.78567e-09	2.92727e-08	PKN2	1817.08	-0.36537	0.100973	-3.61849	0.000296322	0.000702722	C9	26.2275	2.25061	0.649453	3.46539	0.000529465	0.00501829	PPP2R2C	1431.03	-4.6767	0.719197	-6.50267	7.89072e-11
ENSG00000132466	ANKRD17	APOH	14.0061	5.34015	1.1052	4.83185	1.35271e-06	1.21466e-05	IPO5	9868.14	-0.374797	0.0645816	-5.80346	6.49591e-09	2.20404e-08	NR4A3	371.269	-4.04546	0.911598	-4.43776	9.08981e-06	0.000167262	EPHA6	101.509	3.6236	0.676755	5.35438	8.58489e-08	6.99094e-07	ME1	1044.63	1.16942	0.160057	7.30624	2.74728e-13	1.72484e-12	ERGIC1	11237.7	-0.793845	0.183574	-4.32439	1.52954e-05	0.000291091	EIF4G3	4101.57	-1.1565	0.197839	-5.84564	5.04633e-09
ENSG00000135976	ANKRD36	MFSD11	1200.86	0.424877	0.128066	3.31765	0.000907782	0.00370812	PKN2	3549.56	-0.468208	0.0575807	-8.13134	4.24563e-16	2.28577e-15	MYCT1	136.331	-4.16067	0.562512	-7.3966	1.39716e-13	1.55258e-11	CNOT4	791.047	-0.365817	0.115383	-3.17046	0.00152197	0.00502899	SLC9A7	438.586	1.65408	0.179681	9.20562	3.39691e-20	3.66956e-19	SMC4	8572.95	1.12337	0.227229	4.94378	7.66227e-07	2.4509e-05	GTSE1	672.551	5.1956	0.447161	11.6191	3.2967e-31
ENSG00000196912	ANKRD36B	KIAA0586	738	-0.423931	0.138716	-3.05611	0.00224228	0.00800386	ME1	1517.45	-1.68369	0.153176	-10.9919	4.18254e-28	4.11375e-27	CCDC18	456.98	2.77254	0.359814	7.70549	1.3034e-14	1.64697e-12	C1QTNF3	206.341	1.30555	0.42905	3.04289	0.00234317	0.00731836	NEO1	4265.42	-1.14465	0.111394	-10.2757	9.07162e-25	1.34361e-23	ECT2	9010.43	2.19314	0.252665	8.68003	3.95678e-18	2.37308e-15	ZNF638	2873.93	-1.01879	0.219793	-4.63524	3.56525e-06
ENSG00000230006	ANKRD36BP2	VRK1	1048.16	0.772076	0.157395	4.90533	9.32711e-07	8.68086e-06	NEO1	5064.73	-0.284143	0.0853101	-3.33071	0.000866256	0.00180766	CIT	2582.9	2.39089	0.340331	7.02518	2.13791e-12	1.99392e-10	SLCO1A2	137.463	-3.78674	0.892412	-4.24327	2.2029e-05	0.000112152	CACNB1	202.367	-1.30625	0.123623	-10.5664	4.26338e-26	6.91309e-25	PLXNA1	18288.4	0.992557	0.307104	3.23199	0.00122931	0.00971527	ARHGAP15	326.953	1.87879	0.395332	4.75245	2.0097e-06
ENSG00000174501	ANKRD36C	GINS1	1253.05	2.00615	0.205864	9.74506	1.93667e-22	4.25407e-20	CACNB1	427.96	0.454329	0.105884	4.2908	1.78027e-05	4.4774e-05	RAB3IP	1396.53	1.95483	0.379748	5.1477	2.637e-07	8.2707e-06	ARHGAP4	2470.42	1.64911	0.468968	3.51647	0.000437325	0.00165183	RHOA	18375.5	-0.180449	0.0594764	-3.03396	0.00241363	0.00493261	ACTR3	24016.1	0.556704	0.17142	3.2476	0.00116381	0.00931003	KIFAP3	3475.91	-1.33025	0.166185	-8.00464	1.19817e-15
ENSG00000135299	ANKRD6	PABPC1L	2202.56	2.32411	0.276112	8.41725	3.8542e-17	2.75825e-15	IARS2	11913.7	0.435502	0.0603426	7.21715	5.30883e-13	2.37717e-12	MACF1	9208.97	-1.23494	0.382907	-3.22517	0.00125896	0.00966013	STRN4	3214.28	0.882418	0.150746	5.85368	4.80803e-09	4.85723e-08	ACSL4	1988.02	0.889847	0.128024	6.95061	3.63712e-12	2.05673e-11	ASB3	1048.15	0.494217	0.135675	3.64264	0.000269858	0.00297112	EPHA6	23.7565	-5.00339	0.972554	-5.14459	2.68103e-07
ENSG00000185046	ANKS1B	TM9SF4	6260.33	0.655905	0.125942	5.20799	1.90897e-07	2.11708e-06	SYT1	2095.01	2.99621	0.241004	12.4322	1.74747e-35	2.38626e-34	GNGT1	51.2425	7.22151	1.72677	4.18209	2.88839e-05	0.000442825	TNRC6A	2500.24	-0.494687	0.158021	-3.13051	0.001745	0.00565652	POLR1A	2858.4	0.784327	0.0749191	10.469	1.19937e-25	1.89199e-24	KYNU	2176.54	2.47656	0.518894	4.77276	1.81719e-06	5.08224e-05	PGR	15.5015	-2.58263	0.627848	-4.11347	3.89755e-05
ENSG00000122359	ANXA11	VSIG1	187.817	-2.44456	0.500509	-4.88414	1.03881e-06	9.58147e-06	ACSL4	2466.98	-1.23018	0.097396	-12.6307	1.42916e-36	2.02976e-35	SYNE1	974.554	-3.31717	0.608221	-5.45389	4.92805e-08	1.8539e-06	DLD	3611.8	-0.979527	0.215569	-4.5439	5.52218e-06	3.17291e-05	CLEC2D	125.739	-0.694963	0.15024	-4.62567	3.73389e-06	1.14886e-05	PARD3B	1288.84	-1.37264	0.360137	-3.81143	0.000138167	0.00174914	GSK3B	3160.51	-0.879428	0.226129	-3.88905	0.000100637
ENSG00000136250	AOAH	CDK16	6341.78	0.639057	0.129452	4.93663	7.94821e-07	7.54911e-06	POLR1A	4282.54	0.393806	0.0505691	7.78749	6.83527e-15	3.42525e-14	CHIT1	505.954	4.34639	1.35136	3.21631	0.0012985	0.00989089	APOH	110521	-5.82016	0.814577	-7.145	8.99942e-13	1.65586e-11	SLC44A1	7065.06	-0.846346	0.0716118	-11.8185	3.13102e-32	7.48489e-31	STX12	4190.37	-1.84389	0.171721	-10.7377	6.77239e-27	3.65556e-23	SLCO1A2	740.464	-3.46604	0.650112	-5.33144	9.74355e-08
ENSG00000138356	AOX1	ZDHHC15	53.5794	-1.7108	0.448257	-3.81655	0.000135332	0.000720171	NUCKS1	30807	0.305291	0.0569205	5.36347	8.16372e-08	2.53999e-07	CTIF	1425.97	-1.20321	0.340816	-3.53039	0.000414942	0.00396434	PHGDH	5084.41	-2.05569	0.439948	-4.67257	2.97451e-06	1.79928e-05	POLB	677.818	1.03999	0.109157	9.52749	1.61125e-21	1.90629e-20	RCN2	5695.79	0.623918	0.186511	3.34521	0.000822197	0.0070994	ADD1	14664.3	-0.787698	0.137764	-5.71775	1.07945e-08
ENSG00000166747	AP1G1	TSC2	3441.04	-0.310319	0.0993952	-3.12207	0.00179582	0.00662939	CLEC2D	675.987	0.446383	0.0932485	4.78702	1.69275e-06	4.68824e-06	SDS	455.565	2.22416	0.690672	3.22028	0.00128065	0.00979335	CBX5	4449.93	1.35499	0.206634	6.55743	5.47438e-11	7.67262e-10	MBD3	1642.3	0.389885	0.108645	3.58861	0.000332444	0.000782375	SPP1	16907.8	5.47292	0.647671	8.45015	2.9093e-17	1.42761e-14	NRP1	3412.47	1.65756	0.403959	4.1033	4.07295e-05
ENSG00000182287	AP1S2	CEP152	341.544	1.06868	0.164052	6.51426	7.30505e-11	1.6743e-09	NUCB2	9708.67	0.942264	0.104458	9.02053	1.87178e-19	1.20908e-18	ARMC9	568.399	-2.29211	0.548273	-4.1806	2.90742e-05	0.000443788	PPM1F	1319.58	0.683138	0.190187	3.59193	0.000328234	0.00128008	ACTN1	10600.4	-0.302107	0.105891	-2.85301	0.00433075	0.00845314	GLE1	3180.78	0.568886	0.173216	3.28425	0.00102254	0.00841091	VCPKMT	239.84	-1.10326	0.25286	-4.3631	1.2823e-05
ENSG00000183020	AP2A2	TJP1	4138.12	-0.824398	0.15054	-5.47626	4.34416e-08	5.53226e-07	SLC44A1	11052.9	0.382844	0.0641828	5.96491	2.44767e-09	8.57073e-09	STAB2	14.0267	-3.35071	0.755162	-4.43708	9.11877e-06	0.000167598	HMGXB4	860.126	0.573851	0.187579	3.05925	0.0022189	0.00697973	PTPN18	2956.29	-0.545577	0.0826205	-6.60341	4.01816e-11	2.0672e-10	NR4A3	1159.22	-1.69856	0.492618	-3.44802	0.00056472	0.00528631	HIF1A	11424.1	1.58088	0.312469	5.05932	4.20744e-07
ENSG00000185009	AP3M1	CSPP1	778.868	0.479205	0.137762	3.4785	0.000504232	0.00223378	POLB	2288.54	1.04297	0.0901073	11.5747	5.53459e-31	6.26642e-30	LMO7	4773.17	2.2409	0.64018	3.50042	0.000464529	0.00435315	HIF1A	6415.89	1.24012	0.332741	3.72698	0.000193785	0.00079678	CHFR	780.887	-0.722533	0.148888	-4.85285	1.21701e-06	3.96139e-06	GORAB	799.67	0.672884	0.150203	4.47983	7.47015e-06	0.000164664	GINS1	1131.76	2.55938	0.343658	7.44745	9.51641e-14
ENSG00000091583	APOH	TRPA1	444.449	-2.27861	0.510181	-4.46628	7.95927e-06	5.94691e-05	MBD3	2348.49	0.2742	0.0703896	3.89547	9.80096e-05	0.000227989	IL1RN	9773.8	3.79117	0.967771	3.91743	8.94999e-05	0.00113045	PAPLN	1139.8	2.22294	0.488558	4.55001	5.36443e-06	3.09182e-05	NFATC3	624.598	0.285952	0.0850874	3.36068	0.000777498	0.00172479	CCDC18	561.71	0.828446	0.206537	4.01112	6.04325e-05	0.000906424	PABPC1L	1301.97	2.47742	0.490425	5.05157	4.38198e-07
ENSG00000256053	APOPT1	TRPS1	589.754	-1.56845	0.385162	-4.07218	4.65743e-05	0.000284088	ACTN1	19999.1	-0.325395	0.0741945	-4.38571	1.15609e-05	2.96459e-05	SLC44A5	614.984	5.0452	1.37073	3.68067	0.000232625	0.00248374	GINS1	355.657	2.72294	0.278432	9.77954	1.37838e-22	1.02064e-20	SIDT1	511.086	-0.942012	0.169036	-5.57284	2.50625e-08	9.81148e-08	GNGT1	294.886	3.32768	0.668788	4.97569	6.50151e-07	2.14148e-05	DNAJC5	6024.79	-1.91995	0.208115	-9.22542	2.82444e-20
ENSG00000075884	ARHGAP15	TUSC3	4538.52	0.731284	0.240725	3.03784	0.00238278	0.00842152	PTPN18	5444.69	0.201376	0.0521835	3.85901	0.000113848	0.000262919	ENPEP	196.282	-4.13469	0.780132	-5.29999	1.15808e-07	3.98801e-06	PABPC1L	2159.63	1.34339	0.315848	4.25328	2.10666e-05	0.000107794	MCM2	1804.11	1.25837	0.119163	10.56	4.56638e-26	7.38318e-25	CHN1	1045.53	1.06676	0.295808	3.60625	0.000310655	0.00331786	ABCD1	959.123	1.23061	0.260621	4.72185	2.33713e-06
ENSG00000163219	ARHGAP25	CNTD2	55.0597	2.65695	0.4435	5.99088	2.08711e-09	3.54864e-08	CHFR	1590.68	0.525423	0.0506758	10.3683	3.4559e-25	2.98623e-24	MFGE8	4685.48	-2.39264	0.60815	-3.9343	8.3439e-05	0.00106724	DNAJC5	3044.02	1.03167	0.156268	6.60192	4.05874e-11	5.79777e-10	PPP2R2C	171.729	1.99799	0.32786	6.09403	1.10104e-09	4.95957e-09	EPB41L4A	489.765	-1.58516	0.379087	-4.18152	2.89565e-05	0.000493643	ZDHHC15	832.296	0.783728	0.261811	2.99349	0.00275811
ENSG00000089820	ARHGAP4	PLEKHA4	1147.34	-0.95044	0.286234	-3.3205	0.00089857	0.00367623	NFATC3	1325.24	-0.640324	0.074087	-8.64287	5.48206e-18	3.26643e-17	ABCA8	82.9966	-5.59628	1.07859	-5.1885	2.11995e-07	6.77886e-06	ISM1	328.021	-2.15819	0.492096	-4.38571	1.15606e-05	6.23866e-05	EIF4G3	2403.11	-0.610513	0.0878772	-6.94734	3.72243e-12	2.10241e-11	LSM7	2533.08	0.691859	0.18393	3.76154	0.000168871	0.00205298	STK24	1380.92	-0.83367	0.206721	-4.03282	5.51111e-05
ENSG00000214944	ARHGEF28	DNAH11	66.7544	1.91081	0.583802	3.27305	0.00106394	0.00424739	SIDT1	2320.95	0.868285	0.136945	6.3404	2.29162e-10	8.63229e-10	OSBPL1A	1180.77	-1.79982	0.483349	-3.72364	0.000196374	0.00216301	MANBAL	2068.27	0.669493	0.200633	3.3369	0.000847184	0.00299002	GTSE1	714.939	1.33603	0.094772	14.0973	3.94309e-45	2.17619e-43	SYNE1	3089.14	-2.21197	0.389525	-5.67863	1.35775e-08	7.83827e-07	TSC2	4067.23	-0.741473	0.241189	-3.07424	0.00211037
ENSG00000131089	ARHGEF9	MET	4470.51	0.891138	0.268765	3.31567	0.000914228	0.00372884	MCM2	1917.47	1.62535	0.105977	15.3369	4.33698e-53	1.11472e-51	PARP1	12975.3	1.3053	0.274378	4.75729	1.96211e-06	4.58513e-05	VSIG1	105.132	3.67348	0.80888	4.54144	5.58723e-06	3.20423e-05	ARHGAP15	127.739	-1.29641	0.150204	-8.63101	6.08107e-18	5.604e-17	ARHGEF9	1350.69	-0.992881	0.265514	-3.73946	0.000184415	0.0021977	CEP152	206.027	1.58169	0.335821	4.70992	2.47811e-06
ENSG00000166233	ARIH1	GARS	6541.53	0.838933	0.148892	5.6345	1.75567e-08	2.42608e-07	PPP2R2C	1318.3	3.51768	0.223146	15.764	5.50319e-56	1.55539e-54	PRIM2	1294.23	1.20167	0.271766	4.42171	9.79225e-06	0.000178407	CDK16	3663.52	1.43843	0.175978	8.1739	2.98583e-16	9.2702e-15	EXOSC7	1115.52	1.14661	0.0920222	12.4601	1.2315e-35	3.64797e-34	NPHP4	1430.94	0.535623	0.148882	3.59763	0.000321134	0.00341221	GDAP1	1468.08	-2.38772	0.26658	-8.95684	3.34105e-19
ENSG00000135931	ARMC9	HYAL4	18.8019	1.71456	0.563073	3.04501	0.00232673	0.00826413	ZNF532	4007.31	-0.310734	0.0796573	-3.90089	9.58389e-05	0.000223214	MAL2	14740.7	3.78047	0.512771	7.37263	1.67299e-13	1.83953e-11	STK24	2241.16	0.839658	0.267258	3.14176	0.00167937	0.00548092	KIFAP3	1066.2	-0.770205	0.0911439	-8.45043	2.90236e-17	2.53907e-16	IQCA1	323.638	2.21357	0.579878	3.81731	0.000134915	0.00171483	IL7	68.3331	2.37654	0.474511	5.0084	5.48835e-07
ENSG00000141337	ARSG	COA1	1673.85	0.538078	0.100121	5.37428	7.68909e-08	9.29958e-07	GTSE1	733.19	3.00055	0.119747	25.0574	1.45041e-138	3.71953e-136	GSDMC	1866.05	7.70898	1.01259	7.61313	2.67544e-14	3.3008e-12	DHRS12	260.376	-1.42258	0.241988	-5.8787	4.13493e-09	4.22442e-08	FMO4	128.505	-1.8874	0.122427	-15.4166	1.26643e-53	1.12712e-51	CHRM3	1653.32	-1.52839	0.392659	-3.89242	9.9249e-05	0.00134477	GSDMD	1731.51	2.09	0.425684	4.90976	9.11893e-07
ENSG00000214435	AS3MT	BAG1	5334.71	-0.691341	0.206236	-3.35218	0.000801774	0.00334281	EXOSC7	1216.11	0.256584	0.054168	4.73682	2.17096e-06	5.95348e-06	MTG1	244.772	1.58128	0.434837	3.63649	0.00027638	0.00285745	WDR59	2117.07	-0.911099	0.175987	-5.17707	2.25398e-07	1.68842e-06	ITM2A	293.331	-2.12355	0.188359	-11.274	1.76422e-29	3.55688e-28	CHIT1	289.793	3.26165	0.640516	5.09223	3.53883e-07	1.27878e-05	ERI1	1306.69	2.00222	0.263158	7.60844	2.77428e-14
ENSG00000115239	ASB3	HDAC5	2817.01	-0.911786	0.147443	-6.18397	6.25089e-10	1.19307e-08	KIFAP3	3352.82	0.440897	0.0516838	8.53067	1.45503e-17	8.46844e-17	CCDC15	258.835	2.06062	0.42921	4.80096	1.57909e-06	3.84192e-05	CMC2	615.217	-1.04015	0.23272	-4.46952	7.83958e-06	4.38328e-05	EPHA6	6.9901	-4.19504	0.388655	-10.7937	3.68561e-27	6.39897e-26	CTIF	2694.18	-1.67371	0.249301	-6.71362	1.89848e-11	2.21331e-09	PLEKHA4	3525.39	3.29618	0.448225	7.35384	1.92597e-13
ENSG00000143970	ASXL2	PRKAR1A	8584.64	-0.526579	0.104732	-5.02787	4.9595e-07	4.95931e-06	FMO4	403.006	-0.542402	0.0871043	-6.22704	4.75322e-10	1.75196e-09	GPM6A	34.8741	-6.887	1.30291	-5.28587	1.25106e-07	4.25671e-06	TRIP4	980.661	0.61291	0.125837	4.87065	1.11231e-06	7.30533e-06	RSBN1	885.661	-0.551745	0.0859661	-6.41817	1.37919e-10	6.75592e-10	FAM189A2	521.584	-2.45864	0.542287	-4.53383	5.79226e-06	0.000133898	DNAH11	142.24	2.61359	0.606814	4.30707	1.65432e-05
ENSG00000152348	ATG10	RCVRN	3.80317	-2.21663	0.424155	-5.226	1.7322e-07	1.93717e-06	ITM2A	1661.06	-2.22096	0.133548	-16.6305	4.19311e-62	1.45735e-60	CENPU	2719.32	5.4298	0.445042	12.2006	3.08415e-34	1.25517e-31	CEP152	169.421	1.57868	0.269553	5.85666	4.72255e-09	4.7752e-08	EXD2	872.576	-0.251696	0.0658489	-3.82233	0.000132195	0.000330161	SDS	560.533	2.78659	0.415557	6.70569	2.0046e-11	2.30833e-09	POU6F2	40.3417	-2.83387	0.765906	-3.70003	0.000215578
ENSG00000057663	ATG5	SUPT6H	7284.47	-0.295105	0.0952271	-3.09896	0.00194201	0.00709053	RABL2B	1072.34	0.23528	0.0565144	4.16319	3.13838e-05	7.6998e-05	SLC35F4	3.67276	-3.44804	0.901482	-3.82486	0.000130849	0.00154733	CSPP1	1959.52	2.08044	0.414585	5.01812	5.21784e-07	3.64052e-06	MPP4	1.63204	1.93513	0.365115	5.30006	1.15765e-07	4.22946e-07	CPM	2909.28	-1.46678	0.426335	-3.44045	0.00058075	0.00540357	FSD1L	606.361	-1.74944	0.336488	-5.19913	2.00223e-07
ENSG00000119787	ATL2	TBC1D19	242.163	-0.610089	0.134871	-4.52349	6.08278e-06	4.68392e-05	CNOT4	1739.81	-0.160844	0.0392806	-4.09474	4.22646e-05	0.000102224	XRCC4	623.783	1.13798	0.32432	3.50882	0.000450091	0.00423686	TRPA1	36.8059	3.34705	0.865968	3.86509	0.000111047	0.000479778	PGR	40.52	-2.7527	0.229766	-11.9805	4.49784e-33	1.14669e-31	KIAA0513	1884.2	-1.20828	0.308596	-3.91541	9.02491e-05	0.00124555	PLEKHA1	1004.93	-2.58917	0.233919	-11.0687	1.77997e-28
ENSG00000205464	ATP6AP1L	DDX6	5760.69	-0.429646	0.101546	-4.23103	2.32618e-05	0.00015411	RSBN1	1780.23	-0.290036	0.0557694	-5.20062	1.9862e-07	5.97966e-07	ABI3BP	521.357	-3.60841	0.986451	-3.65797	0.000254221	0.00267692	GDAP1	258.055	1.04758	0.356288	2.94025	0.00327951	0.00977833	C1QTNF3	137.602	-1.10886	0.172516	-6.42759	1.29639e-10	6.37722e-10	TEX10	2481.29	0.52933	0.153533	3.44767	0.000565447	0.00528968	CYP2C18	0.756241	-5.23025	0.847353	-6.17246	6.72355e-10
ENSG00000254870	ATP6V1G2-DDX39B	KCTD10	3335.03	-1.05528	0.113246	-9.31853	1.17968e-20	1.68531e-18	PGR	8211.92	0.67931	0.241472	2.81321	0.00490502	0.00921576	ABCA9	61.1615	-4.39415	0.863678	-5.08771	3.62408e-07	1.07954e-05	TUSC3	2064.34	2.24554	0.402252	5.58241	2.37208e-08	2.12845e-07	GSK3B	2334.14	0.177772	0.0550639	3.22847	0.00124455	0.00266976	TINAG	66.9601	3.34339	0.925805	3.61134	0.000304623	0.00326651	HDAC5	3130.97	-1.34578	0.196714	-6.84133	7.84631e-12
ENSG00000123191	ATP7B	TPD52L1	1457.58	-1.31911	0.322683	-4.08796	4.35192e-05	0.000267471	C1QTNF3	893.685	0.741378	0.142746	5.19369	2.06166e-07	6.19821e-07	CCSAP	1103.86	1.39389	0.350408	3.97792	6.95219e-05	0.000917695	CNTD2	39.0998	-2.05148	0.594613	-3.45012	0.000560345	0.00206726	SLCO1A2	11.378	3.87505	0.496954	7.7976	6.30939e-15	4.58818e-14	AOX1	548.328	-2.6535	0.61777	-4.29529	1.74463e-05	0.000323195	PRKAR1A	8857.5	-1.17468	0.156102	-7.52504	5.27048e-14
ENSG00000054793	ATP9A	GABRG2	42.5336	3.52292	0.96362	3.65592	0.00025626	0.00125282	GSK3B	5340.55	0.304828	0.0508894	5.99001	2.09831e-09	7.38558e-09	PDLIM3	413.588	-4.62367	1.05221	-4.39425	1.11154e-05	0.000197016	DENND3	930.353	1.11748	0.268468	4.16244	3.14868e-05	0.000154702	HSD17B2	794.294	-3.30587	0.264149	-12.5152	6.16694e-36	1.87024e-34	SECISBP2L	3700.21	-1.21947	0.185993	-6.55652	5.50789e-11	5.77286e-09	SUPT6H	5328.91	-0.605423	0.202782	-2.98559	0.00283031
ENSG00000107262	BAG1	DROSHA	3271.27	0.460276	0.139105	3.30884	0.000936821	0.00380547	ZMPSTE24	6031.16	0.588729	0.0519583	11.3308	9.23568e-30	9.83384e-29	MOV10	5431	1.32036	0.327218	4.03512	5.45745e-05	0.00075273	GARS	4995.2	0.843414	0.249956	3.37425	0.000740176	0.0026532	ADD1	6166.86	-0.87687	0.0536956	-16.3304	5.9986e-60	7.62189e-58	FBN2	2127.53	2.3877	0.640799	3.72613	0.000194442	0.0022966	INPP4B	336.672	-1.15594	0.326106	-3.54467	0.00039311
ENSG00000254560	BBOX1-AS1	SKP1	6607.47	-0.394285	0.100575	-3.92031	8.8434e-05	0.000497484	SLCO1A2	60.4885	-2.34129	0.328314	-7.13123	9.94746e-13	4.37186e-12	SPAG17	372.681	5.09441	1.054	4.83338	1.34231e-06	3.32797e-05	COA1	1272.66	0.491775	0.128489	3.82737	0.000129517	0.000551362	GCN1	6039.53	0.499206	0.0768212	6.49829	8.1239e-11	4.07598e-10	C14orf37	345.543	-1.4385	0.360088	-3.99486	6.47316e-05	0.000954193	CLNK	6.68062	3.10417	0.913332	3.39873	0.000676987
ENSG00000141376	BCAS3	C9	8.95265	1.53204	0.507223	3.02045	0.00252397	0.00882613	HSD17B2	171.971	-1.0325	0.248322	-4.15791	3.21178e-05	7.87055e-05	STARD9	362.876	-2.47402	0.505964	-4.88971	1.00983e-06	2.61962e-05	FSD1L	187.239	1.79281	0.269904	6.64241	3.08592e-11	4.48081e-10	ARHGAP4	1844.97	0.798539	0.212547	3.757	0.00017196	0.00042227	SLC38A6	514.075	0.868282	0.214291	4.05188	5.08086e-05	0.000786105	DCPS	870.019	0.554593	0.173011	3.20553	0.00134813
ENSG00000140379	BCL2A1	SMC4	2332.03	0.960724	0.233384	4.1165	3.84677e-05	0.000239798	ADD1	13755.9	-0.507023	0.0415902	-12.1909	3.47502e-34	4.52091e-33	PRMT2	4577.42	-0.779053	0.241945	-3.21996	0.00128208	0.00980155	CYP2C18	1469.57	-3.45453	0.54633	-6.32315	2.56278e-10	3.20649e-09	STRN4	3531.34	0.246583	0.0782304	3.15201	0.00162152	0.00340861	BCL2A1	298.119	1.88866	0.387469	4.87435	1.09167e-06	3.27737e-05	IL10RA	1382.72	1.58754	0.458852	3.4598	0.000540572
ENSG00000110330	BIRC2	TIMMDC1	3647.58	0.536914	0.106734	5.03039	4.89486e-07	4.90532e-06	ARHGAP4	1403.39	0.516286	0.110424	4.67547	2.9328e-06	7.9576e-06	C1orf123	1719.82	-1.18524	0.252106	-4.70136	2.58439e-06	5.78478e-05	KPNB1	7632.03	0.582081	0.140331	4.14792	3.35506e-05	0.000163952	DLD	3862.4	-0.457421	0.0713313	-6.41263	1.43033e-10	6.99603e-10	ARSG	326.123	-0.811366	0.227172	-3.57159	0.000354816	0.00368841	DDX6	5613.49	-0.51904	0.154428	-3.36104	0.000776499
ENSG00000259040	BLOC1S5-TXNDC5	UBE3A	2696.74	-0.437638	0.120744	-3.6245	0.000289521	0.00139055	STRN4	4832.54	0.442107	0.0475571	9.29633	1.45374e-20	9.94375e-20	TDRD5	186.955	7.05918	1.7229	4.09728	4.18038e-05	0.000603411	INPP4B	641.376	2.19897	0.533441	4.12223	3.75217e-05	0.00018166	SCFD1	1475.29	-0.252067	0.0849391	-2.96762	0.00300114	0.00603036	ABCA8	607.807	-2.87686	0.607437	-4.73605	2.1792e-06	5.9408e-05	HPS5	1331.67	0.708049	0.200511	3.53121	0.000413657
ENSG00000152430	BOLL	ECT2	2226.95	1.67679	0.216736	7.73657	1.02135e-14	4.62603e-13	TNRC6A	3915.32	-0.268756	0.0500231	-5.37264	7.75938e-08	2.41933e-07	CDC42EP3	2093.8	-2.33661	0.651555	-3.5862	0.000335536	0.00335289	TBC1D19	233.478	0.897275	0.228523	3.92641	8.62224e-05	0.000381363	G2E3	619.029	0.404	0.110775	3.64703	0.000265286	0.000634719	ITGB3BP	980.957	0.756038	0.144809	5.22092	1.78035e-07	7.13163e-06	KCTD10	2205.53	-0.502624	0.151236	-3.32343	0.000889165
ENSG00000166164	BRD7	PLXNA1	6700.49	1.32293	0.188546	7.01648	2.27522e-12	6.91685e-11	DLD	5108.54	-0.357827	0.054334	-6.5857	4.52739e-11	1.79025e-10	C3orf67	237.621	3.11603	0.89899	3.46615	0.000527971	0.0048166	DCPS	2221.07	-1.22079	0.373406	-3.26934	0.00107798	0.00370344	PHGDH	2078.69	1.59548	0.219183	7.27922	3.35753e-13	2.09335e-12	XCL1	104.012	1.58571	0.481557	3.29288	0.000991681	0.00821934	FBXO9	2519.62	-0.770727	0.177655	-4.33834	1.43566e-05
ENSG00000112983	BRD8	ELMOD3	949.905	0.424016	0.12287	3.45093	0.000558662	0.00244526	G2E3	1359.4	0.33896	0.065287	5.19185	2.08213e-07	6.25564e-07	CCDC51	1218.84	1.28299	0.37846	3.39002	0.000698869	0.00602986	HPS5	1155.53	-1.8716	0.23763	-7.87613	3.37663e-15	8.89863e-14	MFSD11	645.234	-0.821546	0.068209	-12.0446	2.07202e-33	5.43317e-32	PARP1	13328.2	0.693429	0.169101	4.10068	4.1193e-05	0.000662001	WASF1	2175.47	-2.42958	0.452396	-5.37049	7.85247e-08
ENSG00000185024	BRF1	PARD3B	389.38	-2.41176	0.287259	-8.3958	4.62744e-17	3.23844e-15	MFSD11	1523.74	0.254399	0.0548246	4.64024	3.47998e-06	9.37446e-06	ADGRV1	440.012	4.30974	1.22865	3.50772	0.000451969	0.00425198	DAO	1690.96	-5.9456	0.974984	-6.09815	1.07303e-09	1.20433e-08	CBX5	3315.36	0.345625	0.0975308	3.54375	0.000394472	0.000917532	WDPCP	543.11	-0.827594	0.188885	-4.38146	1.17888e-05	0.000236202	VNN1	67.2769	3.80685	0.594774	6.4005	1.54871e-10
ENSG00000162819	BROX	C1orf21	2669.87	-1.37568	0.209697	-6.56033	5.36876e-11	1.27114e-09	UPRT	906.38	0.268698	0.0465911	5.76715	8.06254e-09	2.71408e-08	CAGE1	17.6619	3.60703	1.01218	3.56362	0.000365771	0.00358865	KCTD10	2121.28	0.954575	0.170194	5.60874	2.03802e-08	1.85708e-07	NRP1	1232.02	-0.534784	0.161971	-3.30173	0.000960902	0.00209831	USP53	4330.84	-1.25154	0.230963	-5.41877	6.00103e-08	2.8167e-06	GABRG2	611.352	-4.9433	0.942882	-5.24276	1.58194e-07
ENSG00000166167	BTRC	PHTF1	803.263	0.590335	0.13205	4.47054	7.8023e-06	5.84458e-05	NRP1	6176.51	-1.26537	0.0831005	-15.227	2.34074e-52	5.89614e-51	CCDC171	227.861	-1.83644	0.470442	-3.90364	9.47569e-05	0.00118586	TPD52L1	968.84	-1.69296	0.520621	-3.25181	0.00114674	0.00391035	HIRA	613.409	0.529504	0.100812	5.2524	1.50129e-07	5.41186e-07	PRIM2	1217.15	1.25044	0.179963	6.9483	3.69725e-12	5.15015e-10	RAD50	72.4292	-0.745535	0.228134	-3.26798	0.00108319
ENSG00000047621	C12orf4	ZBTB17	1677.26	0.381676	0.108873	3.50571	0.00045539	0.00204433	PPM1F	2005.51	-1.00548	0.0652119	-15.4187	1.22638e-53	3.21774e-52	SVEP1	464.046	-3.93883	0.774646	-5.08469	3.68235e-07	1.09378e-05	VNN1	7054.23	-2.85738	0.542499	-5.26707	1.38618e-07	1.08271e-06	VRK1	735.999	0.695856	0.104873	6.63523	3.23992e-11	1.68083e-10	HAUS6	2222.42	0.88273	0.17835	4.94942	7.44365e-07	2.38983e-05	ERGIC1	8117.04	1.10373	0.187975	5.87168	4.31403e-09
ENSG00000130921	C12orf65	AKT3	1130.83	-1.95438	0.313375	-6.23654	4.47365e-10	8.80846e-09	HIRA	576.298	0.184523	0.0634017	2.91038	0.0036099	0.00692491	DDIAS	741.191	3.08501	0.458995	6.72123	1.80194e-11	1.48991e-09	CUL9	1262.36	0.612855	0.169501	3.61565	0.000299597	0.00117939	PAPLN	226.225	-0.57096	0.170146	-3.35571	0.000791601	0.00175342	CBWD5	564.466	0.798143	0.216289	3.69017	0.000224103	0.00256072	SMC4	1348.4	2.34651	0.333504	7.03594	1.97923e-12
ENSG00000226397	C12orf77	GPR89A	221.084	0.96625	0.136566	7.07535	1.4907e-12	4.67008e-11	HMGXB4	2230.43	0.193312	0.0536332	3.60433	0.000312961	0.000688156	FAM227B	122.622	-1.54827	0.404363	-3.82891	0.000128713	0.00152436	NME5	184.356	2.60021	0.566588	4.58924	4.44857e-06	2.61026e-05	GINS1	1092.19	1.72625	0.123935	13.9287	4.24115e-44	2.17936e-42	ADAM12	2617.39	3.90067	0.500151	7.79899	6.24035e-15	1.74981e-12	UBE3A	2816.16	-0.771812	0.177299	-4.35316	1.34186e-05
ENSG00000139971	C14orf37	STX12	2289.46	-0.728377	0.0993043	-7.3348	2.22055e-13	7.97573e-12	HIF1A	6910.09	0.405503	0.100484	4.0355	5.44869e-05	0.000130293	KIAA0355	1242.55	-1.21021	0.331081	-3.65533	0.000256852	0.00269738	BRD8	1960.76	0.71414	0.174341	4.09623	4.19938e-05	0.000200928	PABPC1L	905.788	2.96836	0.193289	15.3571	3.17443e-53	2.75694e-51	SLC5A12	329.15	3.5381	0.53934	6.56006	5.37857e-11	5.66482e-09	ECT2	1362.79	1.68661	0.3063	5.50641	3.66215e-08
ENSG00000214226	C17orf67	RCN2	3494.28	0.46964	0.129752	3.61952	0.000295144	0.00141328	VRK1	956.434	0.583827	0.065976	8.84909	8.82375e-19	5.49861e-18	FBXO22	1793.37	1.11283	0.275298	4.04227	5.29354e-05	0.0007353	DROSHA	2149.22	0.998787	0.138628	7.20481	5.81252e-13	1.10096e-11	PRPF6	6650.87	0.797452	0.106533	7.48546	7.12959e-14	4.72152e-13	PDCD4	5125.58	-1.59994	0.262815	-6.08771	1.14539e-09	8.58686e-08	PLXNA1	3778.11	-1.15844	0.330498	-3.50513	0.000456385
ENSG00000187997	C17orf99	SPP1	8542.98	4.19867	0.481828	8.71406	2.93177e-18	2.57894e-16	PAPLN	685.691	-0.71313	0.110063	-6.47929	9.2158e-11	3.57137e-10	ULK4	215.844	-1.73307	0.465258	-3.72497	0.000195337	0.00215667	C9	20507.5	-6.27237	1.08373	-5.78775	7.13339e-09	7.00962e-08	ISM1	75.906	1.12384	0.273515	4.10887	3.97602e-05	0.000107028	CENPU	1683.64	1.45986	0.2652	5.50474	3.69711e-08	1.84565e-06	KLHL18	902.808	-0.782114	0.167033	-4.68239	2.83543e-06
ENSG00000162384	C1orf123	NR4A3	850.423	-3.89374	0.422721	-9.21114	3.22677e-20	4.36371e-18	GINS1	1112.96	2.52683	0.101884	24.801	8.75114e-136	2.11289e-133	KCNAB1	91.3365	-2.86796	0.541743	-5.29394	1.19706e-07	4.09969e-06	TCERG1	1777.57	0.929148	0.138614	6.70315	2.03979e-11	3.04639e-10	TM9SF4	6053.88	0.623653	0.0936421	6.65996	2.73907e-11	1.42982e-10	HAUS1	782.802	0.841607	0.247815	3.39612	0.000683495	0.00614889	EPB41L5	1675.65	0.743353	0.217036	3.42503	0.000614733
ENSG00000116667	C1orf21	MYCT1	255.737	-1.66986	0.261436	-6.38724	1.68903e-10	3.61198e-09	PABPC1L	1243.63	0.646201	0.117851	5.48321	4.17684e-08	1.3313e-07	ZFPM2	140.141	-3.88172	0.962665	-4.03226	5.52429e-05	0.000761096	ERGIC1	11418.4	-0.953868	0.249677	-3.82041	0.000133231	0.00056609	MANBAL	2297.13	0.37492	0.0878769	4.26642	1.98632e-05	5.57349e-05	POC5	695.602	0.600538	0.142761	4.2066	2.59245e-05	0.00045031	PLEKHB2	7445.09	-1.12019	0.177179	-6.32236	2.57593e-10
ENSG00000203724	C1orf53	GORAB	534.688	0.764442	0.153746	4.9721	6.62317e-07	6.43372e-06	DNAJC5	6930.31	0.448559	0.0593286	7.56058	4.0128e-14	1.91853e-13	AKAP13	4893.01	-1.57669	0.432568	-3.64495	0.000267446	0.0027853	SMC4	1087.48	1.38365	0.341406	4.05281	5.06052e-05	0.000237048	VSIG1	36.8183	1.86833	0.326495	5.72238	1.05044e-08	4.27753e-08	XRCC4	694.286	1.06951	0.256162	4.17514	2.97801e-05	0.000505964	KYNU	225.386	2.29441	0.465547	4.92841	8.28996e-07
ENSG00000082196	C1QTNF3	POLK	434.03	-0.770685	0.149886	-5.14179	2.72127e-07	2.90971e-06	PRPF6	10316.3	0.41473	0.0634767	6.53358	6.42154e-11	2.51449e-10	THOP1	3546.52	1.20592	0.36686	3.28714	0.00101211	0.00810709	PCCB	3283.72	-2.67432	0.323703	-8.26165	1.43674e-16	4.61038e-15	CDK16	4202.02	0.412299	0.0985583	4.1833	2.87309e-05	7.89137e-05	UTRN	6468.89	-1.14035	0.257369	-4.43079	9.38893e-06	0.000197387	S100PBP	1564.58	0.697929	0.169264	4.12331	3.73466e-05
ENSG00000273294	C1QTNF3-AMACR	CCDC18	311.412	1.12431	0.177306	6.34106	2.28187e-10	4.76185e-09	ISM1	829.603	-2.1991	0.13183	-16.6813	1.79139e-62	6.31313e-61	NEGR1	143.681	-4.32019	0.981207	-4.40294	1.06795e-05	0.0001908	UBE3A	2437.83	-0.506446	0.14433	-3.50895	0.000449877	0.00169503	ZDHHC15	16.1075	-2.06895	0.212132	-9.75312	1.78892e-22	2.25994e-21	ABI3BP	2172.22	-2.90136	0.574725	-5.04825	4.45872e-07	1.55522e-05	C1orf21	3606.67	-0.777552	0.254676	-3.0531	0.00226487
ENSG00000205863	C1QTNF9B	CIT	1370.25	1.52393	0.20641	7.38302	1.54735e-13	5.68083e-12	TM9SF4	7266.13	0.44892	0.0423205	10.6076	2.74618e-26	2.49254e-25	IL20RB	6681.25	6.74926	1.13494	5.9468	2.73437e-09	1.40932e-07	ECT2	1304.29	3.73949	0.332418	11.2494	2.3328e-29	4.36181e-27	STK24	4092.97	-0.244822	0.0857234	-2.85595	0.00429084	0.00838104	ABCA9	228.182	-2.06249	0.505546	-4.07972	4.50901e-05	0.000712695	AKT3	2651.34	-1.48316	0.367201	-4.03909	5.36598e-05
ENSG00000197927	C2orf27A	COL21A1	201.293	-2.52222	0.440482	-5.72605	1.02796e-08	1.49383e-07	POLI	1860.87	-0.441979	0.0725823	-6.08935	1.13371e-09	4.06351e-09	DLEU1	252.059	2.12952	0.498891	4.26851	1.96783e-05	0.000320914	PLXNA1	2090.11	2.25623	0.260757	8.65262	5.03307e-18	1.9164e-16	POLR2C	2697.39	0.380818	0.0708605	5.37419	7.69273e-08	2.85835e-07	DISP1	940.793	-0.839424	0.241058	-3.48225	0.000497224	0.00477136	GPR89A	266.122	1.26868	0.165902	7.64719	2.05419e-14
ENSG00000187699	C2orf88	SSR1	7677.04	0.380442	0.123614	3.07767	0.00208626	0.00752895	VSIG1	61.085	1.68599	0.166969	10.0976	5.6598e-24	4.58594e-23	SHMT1	2687.9	1.51601	0.39405	3.84725	0.000119451	0.0014309	EPB41L5	1756.46	-1.49823	0.230733	-6.49334	8.39529e-11	1.1362e-09	WDR59	1396.16	0.462519	0.0578882	7.98987	1.35086e-15	1.03371e-14	CCSAP	1360.64	0.973549	0.180712	5.38731	7.15209e-08	3.25782e-06	SPP1	149178	2.53131	0.623374	4.06067	4.89328e-05
ENSG00000163689	C3orf67	RAB3IP	1498.06	1.59532	0.281608	5.66502	1.4701e-08	2.07139e-07	ABCD1	1582.53	0.467277	0.0953546	4.90041	9.56356e-07	2.71058e-06	CDH5	830.881	-2.45179	0.68971	-3.55481	0.000378253	0.00368573	DNAH6	142.768	-2.35312	0.393098	-5.98609	2.14945e-09	2.30134e-08	CMC2	487	0.492725	0.0857934	5.74316	9.29245e-09	3.8044e-08	MX1	9185.19	1.3984	0.38198	3.66093	0.000251298	0.00281201	GDA	770.044	-5.30934	0.805894	-6.58813	4.45388e-11
ENSG00000184530	C6orf58	MACF1	8268.26	-1.01906	0.197467	-5.16065	2.46092e-07	2.65825e-06	CDK16	7562.37	0.646424	0.0647451	9.98415	1.78835e-23	1.41076e-22	MED14	4153.99	1.30556	0.350944	3.72013	0.000199118	0.00218708	IL1R1	3958.5	-1.28257	0.296299	-4.32863	1.5004e-05	7.9244e-05	TRIP4	751.625	-0.691508	0.064024	-10.8008	3.41381e-27	5.93751e-26	STARD9	963.771	-1.18555	0.334917	-3.53982	0.000400399	0.00403909	GLE1	1565.3	0.593477	0.174187	3.40712	0.000656521
ENSG00000113600	C9	GNGT1	54.7882	1.50689	0.388588	3.87787	0.000105375	0.000579416	ZDHHC15	187.006	-1.14213	0.124112	-9.20238	3.50111e-20	2.34914e-19	TPRXL	390.225	4.5652	1.08212	4.21876	2.45655e-05	0.00038645	PLEKHB2	4137.53	1.47105	0.239271	6.14806	7.84363e-10	9.05548e-09	ACSBG1	11.0931	-1.03571	0.142521	-7.26709	3.67326e-13	2.28191e-12	PSMC2	6734.11	0.85904	0.187438	4.58306	4.58221e-06	0.000109988	GORAB	701.158	1.20696	0.221852	5.44039	5.31626e-08
ENSG00000205549	C9orf92	LSM7	3088.59	0.816256	0.181333	4.50143	6.7499e-06	5.12758e-05	DHRS12	296.967	-0.596001	0.0787248	-7.57069	3.7126e-14	1.77987e-13	AP1S2	1174.78	-2.24995	0.519059	-4.33467	1.45981e-05	0.000249245	KYNU	1625.15	-2.09055	0.578466	-3.61395	0.000301567	0.00118589	CEP152	257.044	0.60918	0.11751	5.18407	2.171e-07	7.69756e-07	TDRD5	375.855	1.80642	0.553759	3.26211	0.00110588	0.00894437	CHRNA2	28.5536	-4.63881	0.842731	-5.50449	3.70232e-08
ENSG00000067191	CACNB1	SULT4A1	70.5044	2.97364	0.757391	3.92617	8.63103e-05	0.000486629	WDR59	1772.56	-0.39886	0.0517963	-7.70055	1.35486e-14	6.65278e-14	CTNNA3	6.75132	-4.90496	1.11901	-4.38331	1.1689e-05	0.00020567	ALMS1	806.009	0.5819	0.152955	3.8044	0.000142151	0.000601169	TJP1	2594.14	-0.507717	0.0903706	-5.61817	1.92993e-08	7.62858e-08	PRMT9	678.726	-0.750395	0.1598	-4.69585	2.65505e-06	6.95695e-05	CRISPLD1	5007.47	3.33886	0.399589	8.35574	6.50253e-17
ENSG00000164304	CAGE1	C12orf65	1064.16	0.626737	0.111532	5.61936	1.9167e-08	2.62947e-07	CMC2	605.79	0.59273	0.079641	7.44253	9.87745e-14	4.60599e-13	ST6GALNAC3	46.4536	-4.04024	0.739541	-5.46317	4.67715e-08	1.78277e-06	S100PBP	716.46	0.787825	0.160803	4.89931	9.61718e-07	6.39534e-06	CSPP1	624.127	0.782253	0.0978556	7.99395	1.30681e-15	1.00155e-14	RAD21	18548.8	0.775081	0.162138	4.78038	1.74961e-06	4.92194e-05	RDH10	3306.49	3.0394	0.528458	5.75145	8.84827e-09
ENSG00000183049	CAMK1D	SYNE1	1431.19	-2.53774	0.266395	-9.52624	1.6308e-21	2.73004e-19	TRIP4	1744.36	0.116667	0.041223	2.83014	0.00465272	0.00876833	PBX1	5280.39	-2.32056	0.59776	-3.8821	0.00010356	0.00127657	CFHR3	7404.68	-6.13288	0.937268	-6.54336	6.01527e-11	8.37245e-10	TRPA1	279.401	-1.26449	0.250231	-5.0533	4.34246e-07	1.48904e-06	SVEP1	1506.55	-1.9567	0.400444	-4.88632	1.02736e-06	3.12671e-05	ANXA11	2732.05	-1.6321	0.286909	-5.68855	1.2812e-08
ENSG00000008118	CAMK1G	ARHGEF9	946.103	-1.47357	0.163028	-9.03877	1.58445e-19	1.81905e-17	TJP1	5732.53	-0.626054	0.0587928	-10.6485	1.77257e-26	1.62313e-25	DLEU7	18.9068	3.68908	0.938886	3.92921	8.52247e-05	0.0010852	AKT3	1262.63	1.64527	0.402967	4.08289	4.44798e-05	0.000211553	STK3	707.909	0.833686	0.102805	8.10936	5.08858e-16	4.02483e-15	DDIAS	1139.59	2.22763	0.303344	7.34355	2.07995e-13	4.00966e-11	CCDC18	151.817	1.62342	0.313852	5.17255	2.30915e-07
ENSG00000145349	CAMK2D	MRPS25	2000.89	0.532314	0.173153	3.07425	0.00211032	0.00759848	CSPP1	1464.71	0.384239	0.0755825	5.08371	3.70141e-07	1.08935e-06	NKRF	869.129	0.927497	0.28694	3.23237	0.00122767	0.00945516	SLC35A3	1266.17	-1.36727	0.213086	-6.41651	1.3943e-10	1.82146e-09	GDAP1	285.092	0.640533	0.151122	4.23852	2.24999e-05	6.27323e-05	WDR72	3637.74	3.04348	0.475121	6.40569	1.49693e-10	1.43645e-08	HERPUD2	1988.73	0.582255	0.183663	3.17023	0.00152316
ENSG00000254166	CASC19	ACLY	7713.79	0.769807	0.135284	5.69029	1.26821e-08	1.80771e-07	TRPA1	260.765	4.54163	0.264122	17.1952	2.88365e-66	1.14216e-64	FAM183A	188.104	3.92173	1.03542	3.78759	0.000152117	0.00175913	RCN2	1818.25	1.33806	0.175023	7.64506	2.08846e-14	4.89829e-13	TRPS1	170.699	-0.808111	0.205846	-3.92579	8.64438e-05	0.000221827	KCNAB1	223.45	-1.20208	0.259413	-4.63386	3.58912e-06	8.97425e-05	CIT	1931.2	-2.23882	0.383807	-5.83319	5.43778e-09
ENSG00000249395	CASC9	NPHP4	668.361	0.710431	0.133804	5.30948	1.09938e-07	1.28152e-06	STK3	2362.85	0.332191	0.0687472	4.83207	1.35123e-06	3.77717e-06	C17orf99	37.1543	4.23453	1.11465	3.79899	0.000145287	0.00169237	CHRNB4	14.7249	3.48833	0.856232	4.07404	4.62036e-05	0.000218942	ERI1	641.491	0.527278	0.113909	4.62894	3.67548e-06	1.13168e-05	STK32A	65.8585	-1.97054	0.541024	-3.64224	0.000270271	0.00297271	IFT81	1115.22	0.953944	0.239914	3.97619	7.00286e-05
ENSG00000196954	CASP4	WDR44	815.613	-0.682577	0.161178	-4.23493	2.28628e-05	0.000151774	GDAP1	1696.74	1.00609	0.150946	6.66525	2.64221e-11	1.05975e-10	KIR2DL4	97.645	3.53467	1.0914	3.23865	0.00120096	0.00929934	SPP1	118978	6.17257	0.685442	9.00524	2.152e-19	9.8178e-18	TUSC3	240.746	-1.25517	0.181614	-6.91123	4.80459e-12	2.68502e-11	SEMA3E	401.971	-2.35829	0.639842	-3.68574	0.000228043	0.00259607	ATP7B	230.519	-1.69503	0.306439	-5.53138	3.17712e-08
ENSG00000165806	CASP7	DAP3	5197.56	0.358522	0.110013	3.25891	0.00111839	0.00443865	IL7	71.7279	-0.558206	0.119899	-4.65564	3.2298e-06	8.72591e-06	ALG1L	639.467	3.31539	0.779908	4.251	2.12819e-05	0.000342984	ATL2	1974.49	-0.986509	0.206326	-4.7813	1.74161e-06	1.10377e-05	KLHDC4	1409.09	0.754053	0.0879156	8.57701	9.7367e-18	8.83885e-17	FAM86JP	250.998	1.13822	0.283992	4.00791	6.12578e-05	0.000914725	ACVR1C	96.839	-4.27866	0.682096	-6.27281	3.54584e-10
ENSG00000129993	CBFA2T3	CHRM3	334.655	-3.27669	0.480578	-6.81824	9.21639e-12	2.51062e-10	TRPS1	29479.1	1.25733	0.10995	11.4355	2.77854e-30	3.03759e-29	GRM7	8.9077	-4.40921	1.28843	-3.42215	0.000621276	0.0054873	MYCT1	326.11	-1.47808	0.281965	-5.24207	1.58788e-07	1.2251e-06	CNTD2	192.545	4.90651	0.255515	19.2025	3.52879e-82	1.43756e-79	PRKCE	1014.71	-0.59869	0.174623	-3.42848	0.000606981	0.00560296	CPNE5	2119.46	-2.1691	0.545109	-3.9792	6.91481e-05
ENSG00000172785	CBWD1	CHIT1	254.965	3.26961	0.557695	5.86271	4.55371e-09	7.20122e-08	GSDMD	4662.49	1.03009	0.0930587	11.0693	1.76814e-28	1.76974e-27	STK31	129.215	3.62094	1.07414	3.371	0.000748948	0.00636555	GORAB	851.652	1.39938	0.36319	3.85303	0.000116666	0.000501822	DENND3	873.879	-0.60581	0.100294	-6.04034	1.53787e-09	6.83274e-09	COL24A1	251.829	2.3831	0.456827	5.21664	1.82202e-07	7.27157e-06	SSR1	7081.37	0.629774	0.160659	3.91994	8.85717e-05
ENSG00000147996	CBWD5	TMTC1	745.635	-1.92997	0.384339	-5.02152	5.12653e-07	5.10919e-06	CNTD2	469.229	2.98321	0.178461	16.7163	9.96641e-63	3.54534e-61	ADH7	2971.23	6.99456	1.9661	3.55759	0.000374275	0.0036532	TEX14	10.3596	-1.13079	0.371564	-3.04332	0.00233982	0.00731064	MET	5505.86	1.84015	0.109038	16.8763	6.7211e-64	1.03747e-61	THOP1	3658.98	0.82252	0.190059	4.32771	1.50664e-05	0.000287876	EPS15L1	1976.74	-0.738677	0.178124	-4.14697	3.36907e-05
ENSG00000215126	CBWD6	IPO8	2532.4	-0.502436	0.120174	-4.1809	2.90353e-05	0.000187584	DENND3	1200.05	-0.388149	0.076846	-5.051	4.39511e-07	1.28411e-06	MMP1	3449.53	5.61777	1.32921	4.22641	2.37451e-05	0.000375239	ANXA11	12799.7	1.41683	0.202136	7.0093	2.39517e-12	4.16436e-11	GARS	5547.96	1.23366	0.0787767	15.6602	2.82844e-55	2.73273e-53	NEGR1	606.305	-2.38022	0.492137	-4.83649	1.32149e-06	3.86355e-05	MACF1	10897.6	-1.08507	0.27523	-3.9424	8.06701e-05
ENSG00000094916	CBX5	E2F5	337.62	1.00845	0.219693	4.59025	4.42705e-06	3.51656e-05	PLEKHA4	2076.58	-0.891666	0.11866	-7.51445	5.71521e-14	2.71104e-13	KANK2	3712.44	-3.5562	0.455961	-7.79933	6.22349e-15	8.29896e-13	HERPUD2	1373.1	-0.592099	0.131239	-4.51162	6.43355e-06	3.64586e-05	POU6F2	61.5511	3.15645	0.511517	6.17077	6.79597e-10	3.12013e-09	MUCL1	123.379	3.41863	0.84342	4.05329	5.05024e-05	0.000782977	CHN1	5343.85	-3.46649	0.36698	-9.446	3.5201e-21
ENSG00000158941	CCAR2	SBF2	996.005	-0.904225	0.151162	-5.98184	2.20626e-09	3.73453e-08	TFPI2	1139.79	-0.920189	0.257388	-3.57511	0.000350083	0.000765628	SVIL	5035.73	-2.06532	0.508784	-4.05933	4.92136e-05	0.000693254	CIT	481.002	1.11173	0.361289	3.07712	0.00209008	0.00662245	COA1	1170.84	0.805099	0.0784824	10.2583	1.08559e-24	1.59889e-23	DMXL1	3642.62	-0.793436	0.192814	-4.11504	3.8711e-05	0.000628191	CBFA2T3	112.007	-3.23061	0.450273	-7.17478	7.2426e-13
ENSG00000149548	CCDC15	NUMB	2666.38	-0.34608	0.102534	-3.37528	0.000737412	0.00310394	DNAH11	140.165	1.76088	0.223452	7.88035	3.2646e-15	1.6633e-14	NUP62CL	366.116	2.96056	0.585855	5.0534	4.34015e-07	1.25007e-05	IFT81	553.161	1.16159	0.247382	4.69556	2.65883e-06	1.62062e-05	SPATA6L	105.139	1.18123	0.14924	7.91496	2.47328e-15	1.85559e-14	XXYLT1	2458.81	0.971076	0.272153	3.56812	0.000359552	0.00372598	LSM7	2869.99	1.65689	0.298513	5.55047	2.84897e-08
ENSG00000164989	CCDC171	CTIF	1589.18	-1.1684	0.157391	-7.42355	1.14023e-13	4.26476e-12	MET	1880.04	-1.6493	0.145925	-11.3024	1.27713e-29	1.3535e-28	C1orf53	181.09	2.12717	0.52826	4.02674	5.65549e-05	0.000774251	ITPR2	2752.56	-3.03422	0.30735	-9.87219	5.49493e-23	4.35805e-21	DDX58	669.789	-0.630837	0.126815	-4.97448	6.54229e-07	2.2004e-06	CNTNAP2	1585.28	2.93091	0.634679	4.61795	3.87557e-06	9.56314e-05	SULT4A1	942.708	-5.23522	0.834755	-6.27157	3.57422e-10
ENSG00000122483	CCDC18	STT3A	7511.23	0.471199	0.110021	4.2828	1.84558e-05	0.000125711	GARS	7289.64	0.891581	0.0652983	13.654	1.91186e-42	3.43823e-41	SPRR2E	3763.56	7.39843	1.89334	3.9076	9.32169e-05	0.00116829	ATP7B	970.105	-1.55876	0.497034	-3.13612	0.00171201	0.00556845	BAG1	3311.71	-0.432606	0.0804882	-5.37477	7.66794e-08	2.85022e-07	PCCA	1002.4	-1.35153	0.259818	-5.20184	1.97321e-07	7.73906e-06	OSBPL2	2241.21	-0.664747	0.168767	-3.93885	8.18741e-05
ENSG00000164051	CCDC51	GOLM1	4694.37	0.906909	0.209513	4.32865	1.50029e-05	0.000104589	HYAL4	4.81852	0.873631	0.219195	3.98564	6.72988e-05	0.000159576	DOK6	25.6822	-3.08225	0.854195	-3.60837	0.00030813	0.00313096	ACVR1C	68.3811	-3.11767	0.479517	-6.50169	7.94246e-11	1.08016e-09	CYP2C18	90.3404	-2.22309	0.247315	-8.9889	2.49717e-19	2.53737e-18	DLEU1	674.168	0.751042	0.233115	3.22177	0.00127402	0.00997184	SYNE1	2882.83	-2.28651	0.311181	-7.34785	2.01419e-13
ENSG00000183625	CCR3	FAM189A2	185.547	-2.78263	0.342232	-8.13084	4.26327e-16	2.47341e-14	USP42	1299.05	0.14536	0.0436436	3.33062	0.000866528	0.00180815	LINC01359	16.8288	-2.35213	0.677319	-3.47271	0.000515231	0.00472099	PLGLB2	44.0163	-3.9644	0.649725	-6.10166	1.04972e-09	1.18174e-08	KPNB1	7557.53	0.424625	0.0629075	6.74999	1.47857e-11	7.9052e-11	SH2D4B	16.5299	2.07069	0.488478	4.23906	2.24455e-05	0.000400183	ARHGEF9	2873.97	-2.34096	0.271665	-8.61709	6.86753e-18
ENSG00000154429	CCSAP	RNFT2	267.392	2.15438	0.290804	7.40836	1.27874e-13	4.7501e-12	COA1	2258.77	0.24703	0.0441454	5.59583	2.19572e-08	7.15838e-08	LYPLAL1-AS1	12.436	-3.24101	0.711316	-4.55635	5.20493e-06	0.000104155	PZP	1533.31	-6.29078	0.868672	-7.24184	4.42649e-13	8.534e-12	HDAC5	1743.5	-0.3192	0.11166	-2.85867	0.00425421	0.00831483	PCBP1-AS1	1267.88	-0.834619	0.18598	-4.48769	7.20009e-06	0.000159607	MRPS25	1306.11	-0.724474	0.173845	-4.16736	3.08142e-05
ENSG00000177575	CD163	KIAA0513	899.77	-1.71135	0.242647	-7.05285	1.75284e-12	5.44196e-11	FSD1L	464.642	0.535818	0.0925981	5.78649	7.18735e-09	2.42992e-08	FEZF1-AS1	263.633	6.88966	1.2744	5.40621	6.43729e-08	2.35385e-06	RAB3IP	1994.95	1.72473	0.259118	6.65615	2.81088e-11	4.10997e-10	RCVRN	2.91576	-0.870874	0.219041	-3.97585	7.01291e-05	0.000182473	PCGF5	5645.12	-0.625144	0.177234	-3.52722	0.000419947	0.00418059	NPHP4	727.571	-0.702072	0.224192	-3.13156	0.00173879
ENSG00000134061	CD180	STAB2	16.5408	-2.73451	0.375641	-7.2796	3.34811e-13	1.17156e-11	DDX58	3928.51	0.995763	0.103981	9.57639	1.00495e-21	7.31257e-21	TRAF3IP2-AS1	81.3608	-1.80352	0.386622	-4.66481	3.08898e-06	6.66622e-05	SLC35E1	2429.75	0.499293	0.147374	3.38793	0.000704226	0.00253766	DCPS	1012.84	0.657768	0.0845134	7.78301	7.08203e-15	5.12834e-14	RAD51B	400.344	0.912134	0.207672	4.39219	1.12216e-05	0.000227498	WDR44	846.952	-0.745238	0.18774	-3.96952	7.20179e-05
ENSG00000163606	CD200R1	NUPL2	514.013	0.359383	0.116099	3.09549	0.00196485	0.00715811	BAG1	5711.38	0.557377	0.092033	6.05627	1.39313e-09	4.96511e-09	RAP2C-AS1	54.3585	-2.36747	0.47397	-4.99497	5.88435e-07	1.62037e-05	EPS15L1	1115.21	0.607757	0.144081	4.21816	2.46306e-05	0.000123871	IL10RA	568.512	-1.37137	0.179052	-7.65909	1.8726e-14	1.31178e-13	MCEMP1	39.5803	2.10668	0.56149	3.75194	0.00017547	0.00211298	ABHD12B	60.1187	-1.45479	0.401351	-3.62474	0.000289257
ENSG00000206531	CD200R1L	IL1RN	5111.36	-1.41967	0.357098	-3.97558	7.02077e-05	0.000405404	SEC23IP	4486.31	0.37187	0.056002	6.6403	3.1304e-11	1.25015e-10	LYRM9	130.598	-2.64324	0.571373	-4.62612	3.72579e-06	7.77331e-05	CHN1	192.532	1.28886	0.427421	3.01544	0.00256609	0.00790906	BIRC2	1552.48	-0.449958	0.0853234	-5.27356	1.33801e-07	4.85206e-07	MAP7D2	467.499	-2.62786	0.745418	-3.52535	0.00042292	0.00420602	POPDC3	117.644	-2.25032	0.719108	-3.12932	0.00175211
ENSG00000010610	CD4	NUSAP1	8.50652	0.951883	0.251142	3.79021	0.000150518	0.000789053	KPNB1	15045.8	0.28867	0.0478007	6.03902	1.55052e-09	5.50917e-09	KCNMB2-AS1	145.903	6.33343	1.51485	4.1809	2.90362e-05	0.000443428	PLD2	1539.76	0.902616	0.175133	5.15388	2.55148e-07	1.89389e-06	DDX6	3830.76	-0.308932	0.0705996	-4.37584	1.20966e-05	3.48353e-05	ANKS1B	69.19	-1.9201	0.507443	-3.78388	0.000154404	0.00190881	DAP3	3833.72	0.696614	0.183772	3.79064	0.00015026
ENSG00000010278	CD9	LRRC49	268.537	-1.02925	0.235715	-4.36649	1.26259e-05	8.97821e-05	HDAC5	4244.42	-0.423201	0.0624554	-6.77605	1.23503e-11	5.05585e-11	LINC00989	5.44395	-4.2363	0.915342	-4.62811	3.69019e-06	7.71445e-05	EPB41L4A	352.207	1.21188	0.349039	3.47205	0.000516493	0.00192093	SOX6	106.894	-0.614673	0.21236	-2.89449	0.00379773	0.00748708	SP140L	1896.37	0.848536	0.233347	3.63638	0.0002765	0.00302427	IGHMBP2	726.055	-1.06718	0.219469	-4.86256	1.15878e-06
ENSG00000153283	CD96	TMEM62	837.667	0.488712	0.16024	3.04988	0.0022893	0.00814872	PRKAR1A	15939	-0.190387	0.0631022	-3.01712	0.00255191	0.00500361	LINC00491	98.5355	6.45321	1.89242	3.41002	0.00064957	0.00568591	CBFA2T3	235.064	-2.51666	0.438351	-5.74119	9.4012e-09	9.08077e-08	DAO	15.4175	-5.85012	0.326292	-17.9291	6.99038e-72	1.69467e-69	NKRF	1178.12	0.742493	0.170355	4.3585	1.30957e-05	0.000257513	SERINC3	7647.59	-1.17931	0.16028	-7.3578	1.8697e-13
ENSG00000143776	CDC42BPA	DBR1	811.309	0.597026	0.10657	5.60219	2.11659e-08	2.87157e-07	RCVRN	7.98922	-1.24791	0.14938	-8.3539	6.60451e-17	3.71527e-16	PRKDC	13931	1.3141	0.35165	3.73694	0.00018627	0.00207212	SYNE1	1761.42	-1.42289	0.371028	-3.83499	0.00012557	0.000536676	KCTD10	2584.01	-0.506842	0.0663735	-7.6362	2.23718e-14	1.55423e-13	AGMO	129.346	2.66934	0.647789	4.12069	3.77742e-05	0.000615535	CHRM3	525.434	-3.38142	0.662805	-5.10168	3.36648e-07
ENSG00000163171	CDC42EP3	AOX1	228.63	-3.62822	0.487046	-7.44944	9.37357e-14	3.54433e-12	CLNK	32.4686	0.649761	0.171389	3.79114	0.000149955	0.0003418	BBOX1-AS1	214.318	7.97288	1.55405	5.13039	2.89137e-07	8.95326e-06	MRPS25	1219.28	-0.966639	0.179399	-5.38819	7.11692e-08	5.88866e-07	TPD52L1	920.752	1.13111	0.150218	7.52984	5.08023e-14	3.41587e-13	C17orf99	32.733	1.77463	0.500261	3.54741	0.000389039	0.00395189	CHIT1	237.597	2.43758	0.737182	3.30662	0.000944273
ENSG00000164649	CDCA7L	SENP7	725.501	-0.478713	0.157801	-3.03365	0.00241616	0.00851573	DCPS	1418.46	0.296209	0.0603753	4.90612	9.28948e-07	2.63553e-06	LINC01572	54.4922	3.31329	0.56481	5.8662	4.45884e-09	2.19351e-07	ACLY	4649.31	1.14863	0.223436	5.14076	2.73635e-07	2.01858e-06	FBXO9	1248.4	-0.233965	0.0666467	-3.51053	0.000447216	0.00103189	ZNF383	579.605	-0.679818	0.194489	-3.4954	0.000473354	0.00458845	TPT1	45990	1.70491	0.377601	4.5151	6.32863e-06
ENSG00000179776	CDH5	SECISBP2L	1622.2	-0.909973	0.150384	-6.05101	1.43942e-09	2.53943e-08	BIRC2	3609.44	-0.176266	0.0535398	-3.29224	0.000993933	0.00205904	ACACA	4941.39	1.16444	0.325491	3.57749	0.000346905	0.00344018	WDR44	740.021	-0.896929	0.206011	-4.35378	1.33809e-05	7.12561e-05	VNN1	436.159	2.35022	0.332921	7.05939	1.67233e-12	9.76705e-12	ALG1L	269.191	1.89901	0.43373	4.37831	1.19602e-05	0.000238772	TMTC1	832.871	-2.20514	0.430249	-5.12528	2.97104e-07
ENSG00000150394	CDH8	COPS4	1451.48	-0.552731	0.114479	-4.82825	1.3774e-06	1.23333e-05	DDX6	11222.6	-0.210386	0.0502645	-4.18558	2.84439e-05	7.00959e-05								IQCA1	135.251	2.64889	0.651389	4.06653	4.77189e-05	0.000225287	BRD8	1585.36	0.254221	0.0629424	4.03895	5.36909e-05	0.000141841	PTPN1	5975.07	0.531036	0.154676	3.4332	0.000596494	0.00552387	E2F5	689.855	1.74154	0.248652	7.00392	2.48893e-12
ENSG00000008128	CDK11A	USO1	4086.37	-0.37439	0.124773	-3.00058	0.00269463	0.00933614	SOX6	281.353	-1.03311	0.191907	-5.38337	7.31033e-08	2.28466e-07								UBE2G1	1848.46	-0.518384	0.13743	-3.77198	0.000161958	0.000677232	MRPS27	2796.52	0.429458	0.0762836	5.62976	1.8046e-08	7.1554e-08	MMP1	11946.9	3.20517	0.572823	5.59539	2.20125e-08	1.18336e-06	CTIF	2236.56	-2.33873	0.288387	-8.10972	5.07363e-16
ENSG00000248333	CDK11B	FBN2	1441	3.02575	0.511842	5.91148	3.39042e-09	5.51538e-08	HPS5	1943.37	-0.728758	0.0540609	-13.4803	2.04247e-41	3.51439e-40								POPDC3	25.3897	4.49371	1.34725	3.33546	0.000851573	0.00300361	GABRG2	5.36114	-2.87296	0.490935	-5.85202	4.85628e-09	2.04672e-08	SLC39A10	2619.15	1.1504	0.235888	4.87687	1.0778e-06	3.24784e-05	CD180	337.814	2.44279	0.455582	5.36192	8.23419e-08
ENSG00000102225	CDK16	CSAD	774.485	0.736042	0.236517	3.112	0.00185825	0.00683048	KCTD10	4766.94	-0.576327	0.04094	-14.0774	5.23275e-45	1.03269e-43								SERINC3	7097.35	-0.516651	0.155287	-3.32707	0.000877655	0.0030865	DROSHA	1979.96	0.293867	0.0638353	4.60352	4.15406e-06	1.26876e-05	KANK2	5954.66	-1.73587	0.366544	-4.73578	2.18213e-06	5.9416e-05	PTPN22	83.4676	2.68982	0.504781	5.32868	9.89295e-08
ENSG00000155111	CDK19	SLC38A6	343.839	0.501055	0.147592	3.39486	0.000686636	0.00291866	NME5	313.935	0.534722	0.16104	3.32042	0.000898814	0.00187233								CHIT1	275.848	2.9651	0.809263	3.66395	0.000248351	0.000997489	RAD50	110.371	0.428772	0.0947738	4.52416	6.06366e-06	1.8114e-05	C2orf27A	49.7553	0.947146	0.275464	3.43837	0.000585233	0.0054359	STT3A	5130.45	1.07458	0.173317	6.20009	5.64296e-10
ENSG00000153046	CDYL	SCAPER	582.72	-0.916403	0.174023	-5.26599	1.39432e-07	1.59116e-06	MRPS27	4116.84	-0.14678	0.0474268	-3.09487	0.00196896	0.00392383								TPT1	59846.3	-0.876471	0.241699	-3.62629	0.000287519	0.00113612	C9	2.43156	1.31873	0.323135	4.08106	4.48302e-05	0.000119697	NUP62CL	301.266	1.91621	0.345941	5.53913	3.03975e-08	1.56455e-06	KIAA0513	2583.33	-4.44288	0.392961	-11.3062	1.22338e-29
ENSG00000166446	CDYL2	WDR93	23.2842	1.64942	0.337247	4.89083	1.00411e-06	9.29304e-06	GABRG2	10.1531	3.2848	0.52084	6.30673	2.84994e-10	1.06611e-09								IPO8	1999.41	-0.496508	0.117769	-4.21594	2.48745e-05	0.000124929	TCERG1	1838.95	0.588182	0.0766787	7.67073	1.71015e-14	1.20011e-13	UNC13B	4490.97	-1.18021	0.292794	-4.03087	5.5572e-05	0.000844968	DOCK10	2137.68	-1.21465	0.33405	-3.63613	0.000276769
ENSG00000161082	CELF5	CRTC3	1911.35	-0.949826	0.10851	-8.75334	2.07122e-18	1.88749e-16	DROSHA	4110.35	0.214266	0.0477317	4.48896	7.15711e-06	1.87384e-05								E2F5	315.332	1.85561	0.243594	7.61763	2.58377e-14	5.93522e-13	ERGIC1	8159.65	-0.402587	0.0787793	-5.11031	3.21633e-07	1.1191e-06	GIGYF2	5914.42	-0.414559	0.121505	-3.41188	0.000645166	0.00586517	ANKRD36	114.38	-1.20275	0.366673	-3.28018	0.00103742
ENSG00000151725	CENPU	UQCRC2	7192.68	-0.631663	0.123677	-5.10736	3.26693e-07	3.41719e-06	TCERG1	3188.74	0.138113	0.0461534	2.99247	0.00276733	0.00539617								NUMB	2635.76	-0.588245	0.187438	-3.13834	0.0016991	0.00553237	SMC4	1529.88	0.685916	0.120112	5.71062	1.12567e-08	4.56787e-08	ATP6AP1L	166.806	-0.893962	0.261838	-3.41418	0.000639751	0.00582207	LMO7	578.568	-2.64016	0.306706	-8.6081	7.42806e-18
ENSG00000103995	CEP152	NUDT7	26.749	-1.29358	0.304119	-4.25354	2.10417e-05	0.000141199	ERGIC1	20349.2	0.766092	0.0769046	9.96159	2.24448e-23	1.76231e-22								ELP2	3127.49	-0.768983	0.151351	-5.08078	3.75879e-07	2.69558e-06	XRN1	1211.43	-0.525634	0.112707	-4.66374	3.10515e-06	9.64494e-06	DUXAP8	546.039	2.28009	0.467169	4.88065	1.05738e-06	3.20871e-05	TINAG	0.638778	-3.71681	0.877914	-4.23369	2.29889e-05
ENSG00000188452	CERKL	ABCA8	253.083	-3.44948	0.453503	-7.6063	2.82046e-14	1.16882e-12	SMC4	3467.2	1.48999	0.0997815	14.9325	2.02516e-50	4.78273e-49								GOLM1	6738.5	2.11341	0.316244	6.68284	2.34354e-11	3.47215e-10	ACAP2	1661.21	-0.629892	0.0951146	-6.62246	3.53279e-11	1.82725e-10	SACM1L	3124.4	-0.698865	0.132737	-5.26504	1.40156e-07	5.78054e-06	RDX	10628	0.954712	0.240217	3.97437	7.0567e-05
ENSG00000172292	CERS6	OSBPL1A	1266.71	-1.31697	0.236941	-5.55821	2.72562e-08	3.61271e-07	TIMMDC1	3628.48	0.296795	0.0461722	6.428	1.29295e-10	4.96054e-10								FAM189A2	94.6173	1.34055	0.403338	3.32363	0.000888535	0.00312181	ECT2	2946.65	1.81836	0.118308	15.3697	2.61319e-53	2.28458e-51	C17orf67	235.791	0.790192	0.207681	3.80484	0.000141895	0.00178535	LRRC49	800.86	-0.643063	0.212492	-3.0263	0.0024757
ENSG00000159398	CES5A	ITGB3BP	794.547	0.517631	0.132957	3.89323	9.89187e-05	0.0005486	NPHP3	347.055	-0.883668	0.0646627	-13.6658	1.62499e-42	2.92814e-41								SDS	14137.4	-5.29985	0.781857	-6.77854	1.21398e-11	1.88454e-10	FXR1	2553.95	0.279885	0.067708	4.13371	3.56954e-05	9.67046e-05	ARHGEF28	2613.64	-1.58571	0.258716	-6.12915	8.8351e-10	6.80066e-08	DBR1	947.332	0.912247	0.128581	7.09473	1.29602e-12
ENSG00000156042	CFAP70	XCL1	114.551	1.52476	0.401963	3.79329	0.000148664	0.000780088	PCCB	3302.08	0.342836	0.0607467	5.64369	1.66443e-08	5.47543e-08								RNFT2	186.258	3.87199	0.564328	6.86124	6.8263e-12	1.10478e-10	PLXNA1	2857.13	1.3004	0.0971306	13.3882	7.09043e-41	2.93081e-39	RAP2C-AS1	149.155	-0.922124	0.223185	-4.13166	3.60152e-05	0.000592891	SECISBP2L	3468.24	-2.02867	0.238023	-8.52297	1.55507e-17
ENSG00000116785	CFHR3	CDC42BPA	2080.28	-1.692	0.192212	-8.8028	1.33444e-18	1.27093e-16	XRN1	2964.51	-0.276468	0.0642676	-4.30183	1.69396e-05	4.266e-05								ARMC9	651.773	2.56444	0.26775	9.57775	9.91817e-22	6.40833e-20	KLHL18	716.623	0.217679	0.0564585	3.85556	0.000115467	0.000290976	LYRM9	160.265	-1.05081	0.294543	-3.56759	0.000360283	0.00373176	ENPEP	658.211	3.38	0.384935	8.7807	1.62466e-18
ENSG00000159685	CHCHD6	ZC3H8	580.803	0.55627	0.140009	3.97311	7.09394e-05	0.000409194	ACAP2	3718.4	-0.176765	0.0598757	-2.9522	0.00315523	0.00610065								ANKRD36	102.251	1.26801	0.321358	3.94579	7.95387e-05	0.000355329	DNAH6	70.5074	0.716067	0.151803	4.71707	2.39261e-06	7.53176e-06	MYO16-AS1	16.2114	2.4276	0.743555	3.26486	0.00109518	0.00887449	FBN2	600.658	3.38082	0.851778	3.96913	7.21355e-05
ENSG00000153922	CHD1	UBR3	1839.73	-0.739274	0.137302	-5.38431	7.27243e-08	8.84068e-07	ECT2	3333.53	1.92218	0.0893861	21.5042	1.42114e-102	1.56951e-100								STAB2	338.905	-4.4485	0.593759	-7.4921	6.77802e-14	1.46357e-12	ELMOD3	470.401	-0.204476	0.0615135	-3.32408	0.000887097	0.00194942	KCNMB2-AS1	261.955	3.16779	0.554962	5.70813	1.14225e-08	6.69262e-07	SLC38A6	468.816	1.48596	0.284393	5.22502	1.74141e-07
ENSG00000072609	CHFR	CAMK2D	1801.95	-0.888575	0.195719	-4.54005	5.62403e-06	4.3625e-05	USP9Y	1.16904	-0.88965	0.318448	-2.7937	0.00521086	0.00975285								EPRS	6017.81	1.02388	0.190958	5.36184	8.23803e-08	6.72485e-07	KDM3A	2127.23	0.305203	0.0795217	3.83798	0.000124051	0.000311158	LINC01471	6.51066	-2.80481	0.83126	-3.37417	0.000740394	0.00653551	BCL2A1	345.146	2.5423	0.640302	3.97047	7.17307e-05
ENSG00000133063	CHIT1	USP53	1395.17	-0.655617	0.187509	-3.49646	0.00047148	0.00210785	FXR1	8608.83	0.132118	0.0465267	2.83963	0.00451662	0.00853301								IL1RN	1671.42	-3.63151	0.573954	-6.32718	2.49683e-10	3.133e-09	IL1R1	1008.34	-0.966409	0.164845	-5.86254	4.55832e-09	1.92669e-08	ISY1	846.136	0.675786	0.149159	4.53063	5.88068e-06	0.000135724	SCAPER	877.654	-1.44201	0.203031	-7.10241	1.226e-12
ENSG00000134121	CHL1	PDGFC	731.957	-1.01614	0.315186	-3.22394	0.00126442	0.00492963	KLHL18	1277.31	0.115108	0.0397703	2.89432	0.00379986	0.00726474								TINAG	67.4847	7.47922	1.1569	6.46486	1.01391e-10	1.35467e-09	ABCB6	43.5315	2.76896	0.224647	12.3258	6.57692e-35	1.87378e-33	DUXAP10	350.172	2.39747	0.450964	5.31632	1.05888e-07	4.56456e-06	MFGE8	5174.88	0.882359	0.285351	3.09218	0.0019869
ENSG00000234661	CHL1-AS1	NDUFS6	4248.52	0.684677	0.190943	3.58577	0.000336083	0.00157783	ACTR3	13071.8	0.536841	0.0550372	9.75415	1.77075e-22	1.33537e-21								NARS2	561.4	-1.70784	0.149098	-11.4544	2.23396e-30	4.76233e-28	PLEKHB2	5758.4	-0.727772	0.0633932	-11.4803	1.65746e-30	3.55186e-29	CASC9	811.011	1.89509	0.495037	3.82818	0.000129093	0.00165514	VPS53	2011.81	-1.81788	0.181239	-10.0303	1.12154e-23
ENSG00000128656	CHN1	PRIM2	828.872	0.769023	0.129512	5.93784	2.88798e-09	4.77573e-08	EPB41L5	2625.76	0.306113	0.0754933	4.05484	5.01695e-05	0.000120393								RDX	3497.72	-1.36507	0.263221	-5.186	2.14854e-07	1.61776e-06	KYNU	163.724	0.86382	0.209405	4.12512	3.70535e-05	0.000100151	LINC00491	205.54	3.2254	0.804928	4.00707	6.14773e-05	0.000916682	ABCA8	1158.4	-1.76016	0.503108	-3.49858	0.000467734
ENSG00000154645	CHODL	LINC00525	36.3237	2.45257	0.433741	5.65446	1.56334e-08	2.19106e-07	DNAH6	126.681	-1.08477	0.138703	-7.82083	5.2478e-15	2.64435e-14								LRRC49	204.753	2.36956	0.343834	6.89159	5.51722e-12	9.06955e-11	PARD3B	673.538	-0.647894	0.115231	-5.62254	1.88165e-08	7.44819e-08	PRKDC	30618.1	0.891338	0.216394	4.11904	3.80451e-05	0.000619014	BCAS3	1391.39	-0.963704	0.176911	-5.44739	5.11136e-08
ENSG00000133019	CHRM3	ZNF182	387.998	0.486619	0.148811	3.27005	0.00107527	0.00428586	ELMOD3	1509.88	-1.52326	0.0591062	-25.7716	1.8454e-146	5.98319e-144								TMEM62	971.278	0.810147	0.191865	4.22248	2.41625e-05	0.000121755	STXBP3	1543.18	-0.392249	0.0876709	-4.4741	7.67324e-06	2.26449e-05	MIR2052HG	68.2	3.51784	0.622319	5.65279	1.57868e-08	8.91116e-07	OSBPL1A	2665.11	-2.05611	0.243231	-8.45333	2.83118e-17
ENSG00000120903	CHRNA2	DIAPH2	1121.78	-0.852361	0.215407	-3.95698	7.59032e-05	0.00043407	IL1R1	4920.69	-1.00608	0.112752	-8.92289	4.54273e-19	2.86985e-18								DBR1	575.218	0.653065	0.150008	4.35355	1.33951e-05	7.13204e-05	S100PBP	566.706	0.216852	0.0644715	3.36353	0.00076953	0.00170788	BBOX1-AS1	339.607	1.48521	0.382695	3.88092	0.00010406	0.00139702	ITGB3BP	760.601	1.70357	0.275669	6.17977	6.41931e-10
ENSG00000117971	CHRNB4	CXorf57	973.132	1.30353	0.380747	3.42361	0.000617941	0.00266754	PLEKHB2	7692.64	0.535558	0.0558085	9.59635	8.28245e-22	6.05295e-21								AOX1	23116.4	-4.93689	0.739445	-6.67648	2.44743e-11	3.61967e-10	C1orf21	1804.31	-1.05549	0.138687	-7.6106	2.72828e-14	1.87823e-13	LINC01572	142.696	0.831419	0.255306	3.25655	0.00112773	0.00907933	CDC42BPA	2412.54	-1.47467	0.248319	-5.9386	2.87458e-09
ENSG00000122966	CIT	NDUFB9	5334.55	0.489202	0.163632	2.98964	0.00279302	0.00963136	KYNU	1261.48	0.532761	0.188662	2.82389	0.00474446	0.00892999								SECISBP2L	1709.37	-0.716942	0.158342	-4.5278	5.96012e-06	3.4035e-05	PHTF1	345.154	0.222486	0.075365	2.95211	0.0031561	0.00631956	KC6	144.666	2.67849	0.817938	3.27468	0.00105781	0.00863161	EXOC6B	1872.54	-1.49469	0.177929	-8.40049	4.44617e-17
ENSG00000171365	CLCN5	HAUS6	1094.5	0.620575	0.1773	3.50015	0.000465003	0.00208085	PARD3B	1223.33	-1.20554	0.0735663	-16.3871	2.36609e-60	7.68234e-59								PRKG2	51.2523	3.26059	0.754118	4.32372	1.53423e-05	8.08013e-05	AKT3	391.557	-1.10479	0.176354	-6.26464	3.73688e-10	1.7615e-09	NEFL	2082.71	3.96714	0.90723	4.3728	1.22662e-05	0.000243979	ZC3H8	573.279	-1.01017	0.205684	-4.91128	9.04815e-07
ENSG00000069493	CLEC2D	CBWD5	258.998	0.498275	0.1504	3.31299	0.000923046	0.00375915	ALMS1	2557.38	0.232772	0.062172	3.744	0.000181115	0.000408933								USO1	3630.14	-0.810391	0.193463	-4.18886	2.80358e-05	0.000139135	GPR89A	119.971	0.617223	0.0715717	8.62384	6.47473e-18	5.95844e-17								UBR3	1812.79	-1.90421	0.166574	-11.4316	2.90727e-30
ENSG00000166527	CLEC4D	MTG1	268.591	1.54861	0.212035	7.30355	2.80279e-13	9.88023e-12	S100PBP	1725.98	0.1225	0.0398083	3.07725	0.00208919	0.00414868								ENPEP	1358.53	-3.52746	0.388032	-9.09065	9.8451e-20	4.69381e-18	SLC35A3	2283.85	-0.720134	0.111953	-6.43246	1.25552e-10	6.18772e-10								SHQ1	622.059	0.641881	0.179531	3.57531	0.000349813
ENSG00000109684	CLNK	ADAM12	1509.35	1.35195	0.387068	3.4928	0.000477986	0.00213242	PHTF1	1021.46	0.733756	0.0619033	11.8533	2.06954e-32	2.4891e-31								PAPSS1	1811.09	1.60022	0.307085	5.211	1.87825e-07	1.42968e-06	STX12	1596.96	-1.0531	0.0797153	-13.2108	7.6062e-40	2.93236e-38								PDGFC	1636.62	1.78705	0.35573	5.02361	5.07102e-07
ENSG00000177182	CLVS1	CCDC15	153.046	0.726354	0.178846	4.06134	4.8792e-05	0.000295528	ZBTB17	1393.93	0.317319	0.0603633	5.25682	1.46567e-07	4.4614e-07								CSAD	1342.38	-2.10053	0.228765	-9.18203	4.23035e-20	2.12272e-18	RCN2	1985.65	0.596129	0.0923666	6.45395	1.08974e-10	5.40369e-10								PRIM2	523.229	2.34577	0.233869	10.0303	1.12192e-23
ENSG00000187118	CMC1	PDCD4	3411.18	-0.976007	0.211417	-4.6165	3.90273e-06	3.14078e-05	AKT3	2343.67	-0.89336	0.121191	-7.3715	1.6872e-13	7.76083e-13								WDR93	32.8712	1.9113	0.524328	3.64524	0.00026714	0.00106335	CHRNB4	13.7795	-1.65709	0.229429	-7.22268	5.09733e-13	3.12848e-12								GABRR1	8.38279	3.43175	1.05355	3.25732	0.00112469
ENSG00000103121	CMC2	GPM6A	31.5266	-3.04184	0.536085	-5.67418	1.39358e-08	1.97015e-07	GPR89A	407.238	1.03321	0.0630878	16.3773	2.77654e-60	8.99572e-59								MFGE8	2539.31	1.90907	0.275302	6.93447	4.07741e-12	6.84731e-11	SPP1	5115.86	4.08621	0.313855	13.0194	9.48915e-39	3.41195e-37								GNA12	10452.4	0.925646	0.242523	3.81674	0.000135227
ENSG00000137200	CMTR1	PPP1R1C	84.9045	1.3052	0.353407	3.69318	0.000221464	0.00110517	SLC35A3	2755.14	0.502143	0.0730308	6.87578	6.16534e-12	2.57927e-11								UQCRC2	7807.07	-0.767484	0.20546	-3.73544	0.000187385	0.00077289	GDA	1151.9	-0.520817	0.182109	-2.85993	0.00423738	0.00828398								NXF3	15.7563	2.17938	0.642301	3.39309	0.000691101
ENSG00000164309	CMYA5	INPP1	1609.27	-0.74077	0.238861	-3.10127	0.00192695	0.00704911	STX12	3698.7	-0.741558	0.0423193	-17.5229	9.5739e-69	4.1427e-67								NUDT7	154.412	-2.81086	0.25353	-11.0869	1.45273e-28	2.45563e-26	NR4A3	183.593	-1.5981	0.239936	-6.66053	2.72849e-11	1.42486e-10								MAL2	198.013	-5.37378	0.937981	-5.72909	1.00968e-08
ENSG00000080802	CNOT4	CENPU	1197.71	1.56966	0.214568	7.31547	2.56491e-13	9.10927e-12	RCN2	3944.92	0.477296	0.0602941	7.91613	2.45027e-15	1.25928e-14								ABCA8	1017.69	-5.07871	0.498098	-10.1962	2.06191e-24	1.95496e-22	MYCT1	119.926	-1.2307	0.150648	-8.16937	3.09997e-16	2.4964e-15								PLEKHS1	82.9353	5.92776	0.941205	6.29806	3.01401e-10
ENSG00000105219	CNTD2	RABGAP1L	3603.5	0.636441	0.20099	3.16653	0.00154269	0.00582451	CHRNB4	20.0605	1.62013	0.233135	6.94933	3.67019e-12	1.55768e-11								ITGB3BP	474.745	0.967389	0.241241	4.01006	6.07042e-05	0.000278793	GORAB	392.241	-0.297897	0.0895645	-3.32606	0.000880842	0.00193697								ADAM12	1562.13	2.86067	0.542944	5.26882	1.37306e-07
ENSG00000044459	CNTLN	HAUS1	1032.71	0.733702	0.164954	4.44793	8.67016e-06	6.42377e-05	SPP1	13762.8	2.26163	0.16557	13.6596	1.76876e-42	3.18342e-41								INTS3	4906.73	0.797503	0.217525	3.66626	0.000246128	0.000989105	TEX11	28.6758	-4.20561	0.199329	-21.0988	8.15135e-99	5.1953e-96								CCDC15	170.461	1.72811	0.329542	5.24397	1.57161e-07
ENSG00000018236	CNTN1	POC5	485.983	0.617133	0.117104	5.26997	1.36446e-07	1.56224e-06	RAB3GAP2	4344.54	0.234861	0.0604458	3.88548	0.000102129	0.000237085								EXOC6B	1169.79	1.22804	0.184002	6.67408	2.48789e-11	3.66977e-10	RDH10	1677.78	0.675834	0.104803	6.44861	1.12878e-10	5.58887e-10								CDH8	228.671	-4.35038	0.670013	-6.49297	8.41602e-11
ENSG00000174469	CNTNAP2	XRCC4	399.16	0.513402	0.138554	3.70542	0.000211041	0.00106152	GDA	11.9385	-1.64354	0.287492	-5.7168	1.0855e-08	3.61736e-08								ZC3H8	408.791	0.535886	0.172066	3.11443	0.00184302	0.00593914	ANXA11	11468.7	-0.48117	0.0696313	-6.91025	4.83793e-12	2.70289e-11								PPP1R1C	322.755	2.08956	0.597291	3.49839	0.000468068
ENSG00000106603	COA1	BOLL	3.41965	1.88433	0.550399	3.42358	0.000618017	0.00266757	GLE1	3036.07	0.454777	0.0479934	9.47583	2.64647e-21	1.88167e-20								UBR3	1866.1	-1.33336	0.201351	-6.62207	3.54195e-11	5.09216e-10	CCDC18	157.08	0.853812	0.130931	6.52109	6.9798e-11	3.51983e-10								UBE3B	2030.93	-0.611691	0.144751	-4.2258	2.3809e-05
ENSG00000060718	COL11A1	TRIM36	68.0017	1.57834	0.408401	3.86468	0.000111236	0.000608293	NR4A3	513.322	-1.99699	0.16899	-11.8172	3.18166e-32	3.80049e-31								RAB5A	1577.21	-0.807904	0.21831	-3.70072	0.000214988	0.000876209	CIT	1078.86	0.997513	0.0991754	10.0581	8.46435e-24	1.17278e-22								SLC25A31	1.00615	-1.88355	0.487776	-3.8615	0.000112692
ENSG00000124749	COL21A1	UTRN	1861.8	-1.46871	0.238531	-6.1573	7.39952e-10	1.38859e-08	ZNF410	29.7545	-0.271491	0.0903297	-3.00556	0.00265095	0.00518392								IGSF11	42.6175	3.61316	0.855326	4.2243	2.39679e-05	0.000120938	IFT81	279.026	0.655514	0.0916839	7.14972	8.6958e-13	5.22462e-12								TEX9	247.163	1.88608	0.397147	4.74906	2.04368e-06
ENSG00000050767	COL23A1	STK32B	79.3762	-2.01267	0.369889	-5.44129	5.28956e-08	6.62738e-07	ATL2	4253.85	-0.383071	0.0828195	-4.62538	3.73917e-06	1.00441e-05								MUC4	165.867	2.35187	0.633307	3.71363	0.000204307	0.000836343	ATP7B	1280.12	0.674589	0.126662	5.32588	1.00463e-07	3.69327e-07								INPP1	1261.53	-0.934885	0.211407	-4.42221	9.76972e-06
ENSG00000171502	COL24A1	CHD1	1604.35	-0.666719	0.135224	-4.93046	8.20348e-07	7.7702e-06	MYCT1	670.366	-1.92199	0.0933458	-20.5901	3.36994e-94	3.0593e-92								CAMK2D	2010.92	-0.735557	0.226474	-3.24786	0.00116275	0.00395891	ACVR1C	225.054	-1.40076	0.186481	-7.51153	5.84402e-14	3.90154e-13								CENPU	988.353	5.0419	0.424102	11.8884	1.35972e-32
ENSG00000188153	COL4A5	ABI3BP	750.645	-3.39387	0.400117	-8.48219	2.20989e-17	1.65311e-15	GORAB	874.177	0.61193	0.0592118	10.3346	4.91463e-25	4.20746e-24								PDGFC	2629.32	1.10702	0.365668	3.02739	0.00246679	0.00764947	COL21A1	41.4639	-2.12214	0.215769	-9.83526	7.93662e-23	1.03234e-21								RABGAP1L	1363.93	-2.01201	0.190866	-10.5415	5.56089e-26
ENSG00000138663	COPS4	ABCA9	194.824	-2.09661	0.443565	-4.72672	2.28178e-06	1.95248e-05	TEX11	17.769	1.64469	0.148216	11.0966	1.30347e-28	1.31451e-27								PRIM2	391.992	1.17428	0.180358	6.51083	7.47391e-11	1.02058e-09	CPNE5	240.044	-2.06415	0.161399	-12.7891	1.88635e-37	6.22213e-36								HAUS1	1199.19	2.30854	0.323166	7.14352	9.09738e-13
ENSG00000135678	CPM	DISP1	535.669	-1.24863	0.163265	-7.64786	2.04348e-14	8.67645e-13	CHRNA2	19.5246	-1.69606	0.352928	-4.80569	1.54215e-06	4.29052e-06								AIG1	4503.6	-2.61558	0.201985	-12.9494	2.36865e-38	1.39081e-35	SSR1	6115.53	0.362669	0.0788265	4.60085	4.20766e-06	1.28423e-05								XRCC4	339.977	0.76592	0.212625	3.60221	0.000315527
ENSG00000124772	CPNE5	CCSAP	763.421	1.14946	0.166915	6.88652	5.71729e-12	1.62988e-10	RDH10	3415.61	0.762526	0.172556	4.41901	9.91521e-06	2.55731e-05								LANCL3	17.0245	2.38522	0.700011	3.4074	0.000655859	0.00238028	NUP153	1944.63	0.213633	0.0735845	2.90323	0.00369336	0.00729551								TRIM36	769.837	-1.2814	0.363829	-3.522	0.000428311
ENSG00000021826	CPS1	PDLIM3	1757.08	-3.21074	0.423254	-7.58585	3.30308e-14	1.35697e-12	TEX14	167.586	1.6544	0.195218	8.47465	2.35785e-17	1.35698e-16								ZNF182	369.385	0.612626	0.15968	3.83658	0.000124761	0.000533627	KTN1	6142.28	-0.82	0.0950994	-8.62255	6.54769e-18	6.02138e-17								CDYL	1408.16	0.682913	0.203267	3.35969	0.000780309
ENSG00000121005	CRISPLD1	TSEN2	762.199	0.625462	0.205447	3.0444	0.00233144	0.00827623	POLK	1170.84	-0.509634	0.0707377	-7.20456	5.82337e-13	2.60192e-12								ZNF711	238.768	2.28296	0.281917	8.09796	5.5888e-16	1.65679e-14	PZP	3.67416	-0.702733	0.247057	-2.84441	0.00444931	0.00866457								CD96	45.9565	1.80827	0.58934	3.06829	0.00215285
ENSG00000140577	CRTC3	EPHB1	107.091	-2.96835	0.425456	-6.97688	3.01811e-12	8.98129e-11	ANXA11	10715.2	-0.490751	0.0565602	-8.67661	4.07739e-18	2.44616e-17								DIAPH2	1186	-0.820274	0.212038	-3.86852	0.000109496	0.000473786	RAB3IP	985.398	0.311475	0.079451	3.92034	8.84248e-05	0.000226646								FBXL2	483.504	-2.47406	0.501019	-4.93805	7.8909e-07
ENSG00000008405	CRY1	MOV10	3860.22	0.907592	0.146109	6.21173	5.24042e-10	1.01655e-08	CCDC18	298.968	0.402397	0.0866544	4.6437	3.42227e-06	9.22392e-06								NXF3	34.267	-2.4007	0.579583	-4.14212	3.44109e-05	0.000167739	GNGT1	11.2658	3.21534	0.435767	7.37858	1.59989e-13	1.02665e-12								DISP1	896.927	1.62621	0.189492	8.58193	9.32967e-18
ENSG00000139631	CSAD	FAM122B	2335.25	0.529153	0.144777	3.65495	0.000257235	0.00125671	HERPUD2	2018.8	-0.226535	0.0343386	-6.59709	4.19295e-11	1.66177e-10								TRIM55	443.224	-4.7734	0.850245	-5.61415	1.97534e-08	1.80389e-07	CHN1	234.269	0.511089	0.152776	3.34534	0.000821819	0.00181526								CCSAP	2092.43	-1.66704	0.285588	-5.83721	5.30824e-09
ENSG00000164796	CSMD3	MX1	6718.78	1.15309	0.33355	3.45701	0.000546209	0.00239712	CIT	1308.93	1.94584	0.0926478	21.0026	6.2152e-98	6.14628e-96								MAL2	5871.4	1.49175	0.366839	4.0665	4.77242e-05	0.000225287	EPB41L4A	59.9092	-1.6946	0.206362	-8.21179	2.17907e-16	1.77762e-15								PDLIM3	2299.58	2.33679	0.436916	5.34837	8.87489e-08
ENSG00000213923	CSNK1E	DYNC1I1	383.575	-2.45939	0.37521	-6.5547	5.57546e-11	1.31191e-09	IFT81	1082.38	0.337835	0.0618472	5.46242	4.69691e-08	1.49037e-07								GSDMC	34.8901	3.86992	0.727854	5.31689	1.05558e-07	8.44789e-07	LSM7	3125.05	1.22789	0.136995	8.96303	3.15863e-19	3.17761e-18								LY96	550.163	2.82414	0.558494	5.05671	4.26546e-07
ENSG00000104218	CSPP1	ALG8	1878.08	0.796387	0.137528	5.79073	7.00828e-09	1.06401e-07	ITPR2	6587.5	-0.550855	0.11789	-4.67263	2.97361e-06	8.06543e-06								CBWD5	164.352	-1.36095	0.266767	-5.10166	3.36695e-07	2.44179e-06	C12orf65	567.868	0.283609	0.0632209	4.48601	7.25708e-06	2.14713e-05								CHODL	479.133	3.14349	0.921109	3.41273	0.000643161
ENSG00000134030	CTIF	STARD9	314.611	-2.436	0.25311	-9.62425	6.31647e-22	1.22465e-19	ATP7B	1645.75	0.993	0.131824	7.53276	4.96801e-14	2.36475e-13								SEC16A	4741.09	-0.742193	0.183946	-4.03484	5.46396e-05	0.000253392	SYNE1	669.021	-1.51175	0.18848	-8.02077	1.05081e-15	8.10698e-15								NCAM2	2219.34	-2.36796	0.456394	-5.18841	2.12094e-07
ENSG00000044115	CTNNA1	RGL4	27.2931	-1.27117	0.337911	-3.76186	0.000168657	0.000870453	ACVR1C	548.96	-5.29642	0.177134	-29.9007	1.92707e-196	2.82166e-193								PLEKHS1	428.108	6.27775	1.04381	6.01425	1.80716e-09	1.95614e-08	ARHGEF9	763.976	-0.94337	0.0918638	-10.2692	9.69744e-25	1.43415e-23								GABPA	1382.71	0.70765	0.165742	4.26959	1.95831e-05
ENSG00000183230	CTNNA3	CHCHD6	725.076	0.611235	0.149243	4.09556	4.21141e-05	0.000260055	COL21A1	206.194	-0.568173	0.149476	-3.80111	0.00014405	0.000328935								PAOX	28.3175	-1.27504	0.329561	-3.86889	0.000109333	0.000473139	GSE1	4007.8	0.326709	0.092964	3.51435	0.000440824	0.0010181								VOPP1	9238.66	1.90732	0.62718	3.04111	0.00235706
ENSG00000036257	CUL3	PRMT2	3984.08	-0.466753	0.102537	-4.55204	5.31275e-06	4.14048e-05	CPNE5	355.1	0.57911	0.12751	4.5417	5.58034e-06	1.47583e-05								GSTO1	6795.44	-1.9589	0.306739	-6.38621	1.70052e-10	2.18818e-09	ACLY	6443.79	0.654934	0.0680259	9.62771	6.10749e-22	7.43281e-21								CDK19	1764.46	-1.27978	0.276329	-4.63137	3.63249e-06
ENSG00000112659	CUL9	PSMC2	4629.82	0.334152	0.094377	3.54061	0.000399206	0.00182664	SSR1	12411.6	0.370709	0.0537669	6.89474	5.39628e-12	2.26736e-11								ADAM12	300.696	2.71598	0.542511	5.00631	5.54827e-07	3.84462e-06	EXOC4	2833.76	0.204758	0.0634312	3.22804	0.00124643	0.00267336								MOV10	1904.23	1.52603	0.285682	5.34172	9.20703e-08
ENSG00000180871	CXCR2	CELF5	29.7645	2.68262	0.534899	5.01519	5.29797e-07	5.26211e-06	PZP	20.9151	-1.30974	0.149412	-8.76596	1.85198e-18	1.13384e-17								SLC5A12	123.85	-3.97087	0.982811	-4.04032	5.33786e-05	0.000248301	NPHP4	529.533	0.8028	0.0919452	8.73128	2.518e-18	2.38326e-17								ELMO1	3122.88	-1.90905	0.404507	-4.71944	2.36498e-06
ENSG00000147231	CXorf57	C1orf123	1590.92	-0.516771	0.109647	-4.71303	2.44063e-06	2.06838e-05	FGD3	3506.15	2.08747	0.149148	13.9959	1.65111e-44	3.20418e-43								GLYAT	3898.44	-6.72935	1.07139	-6.28095	3.36508e-10	4.12398e-09	LRRC9	6.40806	2.46576	0.309064	7.97815	1.48537e-15	1.13269e-14								FAM122C	303.047	0.861515	0.228917	3.76344	0.000167589
ENSG00000108242	CYP2C18	JAK1	6564.43	-0.645275	0.136639	-4.72247	2.32999e-06	1.98703e-05	RAB3IP	1751.95	0.92601	0.0937117	9.88148	5.00878e-23	3.86524e-22								GLB1L2	376.389	3.12135	0.349778	8.92379	4.50606e-19	1.96627e-17	IQCA1	15.3485	0.620875	0.221029	2.80901	0.00496937	0.00959211								NSMCE2	836.877	1.05869	0.286889	3.69023	0.000224049
ENSG00000008256	CYTH3	LMX1A	2.60745	-3.58453	0.874932	-4.09693	4.18667e-05	0.000258696	SLC35E1	5196.44	0.360226	0.0477293	7.54728	4.44445e-14	2.12133e-13								FEZ1	312.462	-1.37924	0.343779	-4.01198	6.02106e-05	0.000276736	UBE2G1	1506.36	-0.542758	0.0693154	-7.83026	4.86843e-15	3.57254e-14								VPS8	1959.32	-0.635811	0.131476	-4.83595	1.32512e-06
ENSG00000110887	DAO	TDRD5	222.046	1.99129	0.514766	3.86834	0.00010958	0.000600278	EPS15L1	3256.02	0.618548	0.0530801	11.6531	2.21236e-31	2.54876e-30								GPM6A	123.763	-3.43444	0.663164	-5.17887	2.23237e-07	1.6741e-06	POPDC3	13.768	-1.42365	0.311021	-4.57735	4.7091e-06	1.42583e-05								SMG1	2518.57	-1.06395	0.215236	-4.94319	7.68552e-07
ENSG00000132676	DAP3	SPATA17	118.646	1.96219	0.319672	6.13812	8.35056e-10	1.54118e-08	MACF1	19295.6	-0.385511	0.0738525	-5.22001	1.78911e-07	5.40459e-07								FRMD4A	1405.72	1.18639	0.399319	2.97102	0.00296811	0.00896406	PRMT7	1311.05	0.519141	0.0852472	6.08983	1.13029e-09	5.083e-09								PTPDC1	469.213	-1.4038	0.326308	-4.30206	1.69214e-05
ENSG00000167657	DAPK3	BROX	2790.27	0.332016	0.10946	3.0332	0.00241971	0.00852383	GNGT1	23.26	4.95952	0.475965	10.4199	2.01107e-25	1.75412e-24								TEX9	160.847	2.30646	0.35133	6.56493	5.20589e-11	7.327e-10	DAP3	3758.06	0.555114	0.0584233	9.50158	2.06724e-21	2.42906e-20								NCK1	1167.94	1.09051	0.210745	5.17452	2.28495e-07
ENSG00000138231	DBR1	CDC42EP3	2173.17	-1.75701	0.243992	-7.2011	5.9729e-13	2.00864e-11	PLD2	2267.61	-0.386527	0.0587488	-6.57931	4.72636e-11	1.86698e-10								ITIH2	51954.9	-3.5149	0.690369	-5.09134	3.55542e-07	2.56679e-06	SERINC3	7515.51	0.329668	0.0874362	3.77038	0.000162999	0.000401413								DYNC1I1	948.375	-3.50708	0.7013	-5.00082	5.70865e-07
ENSG00000197410	DCHS2	ALB	167.021	5.78908	0.811288	7.13567	9.63185e-13	3.11772e-11	CBFA2T3	719.143	0.410475	0.144199	2.84658	0.0044192	0.00836044								CENPU	374.598	2.1991	0.265983	8.26781	1.36448e-16	4.3869e-15	NMUR2	21.1895	3.58853	0.535069	6.70666	1.99123e-11	1.05096e-10								ALG8	1648.07	1.08888	0.157557	6.911	4.81263e-12
ENSG00000152457	DCLRE1C	C3orf67	207.169	1.77238	0.400289	4.42775	9.52202e-06	6.99355e-05	LSM7	1834.65	1.01305	0.0869015	11.6575	2.102e-31	2.4247e-30								TMEM163	489.523	4.64404	0.486966	9.5367	1.47456e-21	9.24198e-20	CHIT1	154.192	1.3082	0.362172	3.61209	0.000303738	0.000719316								CES5A	5.81712	-3.19317	0.600775	-5.31509	1.06602e-07
ENSG00000110063	DCPS	RPN1	19540.5	0.871244	0.109841	7.93185	2.15911e-15	1.08817e-13	SULT4A1	92.5637	1.61906	0.226418	7.15073	8.63172e-13	3.81205e-12								HAUS1	433.012	0.658694	0.210351	3.13141	0.00173971	0.00564382	TPT1	68443.4	0.422259	0.118149	3.57394	0.000351652	0.000824549								STARD9	613.548	-1.22067	0.402478	-3.03288	0.00242236
ENSG00000132912	DCTN4	CCDC51	901.484	0.519678	0.142535	3.64596	0.000266391	0.00129452	OSBPL2	3929.94	0.232727	0.0550626	4.22658	2.37266e-05	5.88896e-05								POC5	318.612	0.94556	0.19032	4.96828	6.75507e-07	4.61965e-06	TMTC1	260.427	-1.82023	0.18944	-9.60847	7.36353e-22	8.91201e-21								RSPRY1	2360.05	0.788791	0.201123	3.92192	8.7845e-05
ENSG00000165490	DDIAS	SHISA5	18998	0.682313	0.17313	3.94105	8.11256e-05	0.000460953	SYNE1	3350.79	-1.50254	0.0906808	-16.5696	1.15586e-61	3.94774e-60								XRCC4	369.332	1.01593	0.165872	6.12477	9.08141e-10	1.03736e-08	IPO8	2147.65	-0.287029	0.073103	-3.92637	8.62371e-05	0.00022134								AGPAT3	5464.98	-1.02744	0.216298	-4.75013	2.03288e-06
ENSG00000013573	DDX11	PRMT9	430.8	-0.417616	0.12329	-3.38726	0.000705944	0.00298571	ARHGEF9	1816.03	-0.235428	0.0789898	-2.98049	0.0028779	0.00559805								DCLRE1C	502.005	1.38882	0.171461	8.09992	5.49958e-16	1.63323e-14	E2F5	472.762	1.43857	0.116839	12.3124	7.76623e-35	2.20151e-33								PSMC2	6175.83	0.733141	0.189528	3.86826	0.000109617
ENSG00000198563	DDX39B	CAGE1	9.72278	1.6295	0.44324	3.67634	0.000236608	0.00116771	ACLY	12393.4	0.304467	0.0677821	4.49185	7.06062e-06	1.85018e-05								TRIM36	68.1796	2.0515	0.442418	4.63701	3.53486e-06	2.11529e-05	NUMB	2524.83	-0.705141	0.0594461	-11.8619	1.86784e-32	4.54772e-31								CELF5	885.919	-3.80068	0.754743	-5.03573	4.7603e-07
ENSG00000107201	DDX58	PRIMPOL	281.033	-0.397017	0.131487	-3.01943	0.00253249	0.00885102	UBE2D2	5402.53	0.416779	0.0378247	11.0187	3.10472e-28	3.06896e-27								TMEM123	14350.6	-1.16734	0.185921	-6.27866	3.41493e-10	4.17895e-09	CTIF	745.77	-0.33113	0.111932	-2.95831	0.00309331	0.00620547								SHANK2	397.867	-4.03874	0.721591	-5.59699	2.18099e-08
ENSG00000110367	DDX6	SVEP1	617.526	-3.12392	0.316003	-9.88573	4.80066e-23	1.17697e-20	WDR44	1286.55	-0.18288	0.0607011	-3.0128	0.0025885	0.00506923								STK32B	88.3711	2.39066	0.556529	4.29566	1.74177e-05	9.06616e-05	CD180	123.906	-1.70699	0.193523	-8.82061	1.13843e-18	1.10071e-17								C1orf123	2456.85	0.50806	0.165337	3.07288	0.00212007
ENSG00000105339	DENND3	DDIAS	523.06	1.72696	0.214085	8.06672	7.22105e-16	4.0118e-14	ABHD12B	134.897	0.745579	0.224669	3.31857	0.000904793	0.00188409								CDYL	662.913	0.696674	0.183873	3.78888	0.00015133	0.000636129	CHL1	129.817	-2.59201	0.235359	-11.013	3.30824e-28	6.12025e-27								GBP2	3129.24	3.06455	0.462911	6.62016	3.58806e-11
ENSG00000174485	DENND4A	VDAC2	3264.93	-0.591867	0.146569	-4.03814	5.3876e-05	0.000322772	IQCA1	312.831	-0.427045	0.152291	-2.80414	0.00504515	0.00946299								FBXL2	269.456	2.62781	0.275006	9.55549	1.22995e-21	7.82609e-20	PTPN22	135.298	-0.79656	0.158453	-5.0271	4.97956e-07	1.69631e-06								TDRD5	12.4112	-3.05415	0.742687	-4.1123	3.91733e-05
ENSG00000023697	DERA	AMOTL1	2767.78	-1.98886	0.257416	-7.72625	1.1076e-14	4.99287e-13	DAP3	9277.94	0.883529	0.0516012	17.1223	1.01282e-65	3.94955e-64								ABCA9	274.888	-3.34408	0.54226	-6.16693	6.96273e-10	8.10558e-09	STT3A	6515.74	0.457941	0.0606313	7.55288	4.25748e-14	2.88623e-13								SPATA17	184.567	1.63149	0.521243	3.13	0.00174808
ENSG00000183628	DGCR6	ARIH1	3148.44	-0.458349	0.114037	-4.0193	5.83721e-05	0.000346053	SERINC3	12833.5	-0.278478	0.0561666	-4.95808	7.11938e-07	2.04219e-06								NCAM2	106.862	-4.58706	0.602945	-7.60775	2.78905e-14	6.36744e-13	GOLM1	10361.4	-1.27214	0.120878	-10.5241	6.68755e-26	1.06947e-24								ARHGAP25	670.427	0.983548	0.307068	3.20303	0.00135989
ENSG00000102796	DHRS12	FAM227B	89.7715	-1.02006	0.174111	-5.85868	4.66566e-09	7.35684e-08	TPT1	69525.8	-0.52381	0.0725763	-7.21737	5.30022e-13	2.37354e-12								GABPA	1075.47	-0.650998	0.132155	-4.92604	8.39141e-07	5.64397e-06	FAM189A2	49.4807	-2.20687	0.230041	-9.59336	8.52582e-22	1.02747e-20								STK36	1945.19	1.44106	0.276262	5.21626	1.82567e-07
ENSG00000147202	DIAPH2	KIAA0355	1285.22	-0.385182	0.127504	-3.02093	0.00251998	0.00881621	TMTC1	2123.02	-2.27935	0.153931	-14.8076	1.30906e-49	3.02236e-48								VOPP1	1560.33	0.858489	0.218725	3.92497	8.6742e-05	0.000383409	RNFT2	146.762	1.93237	0.146047	13.2312	5.79891e-40	2.26209e-38								WDFY3	2873.23	-1.30177	0.183022	-7.11267	1.13819e-12
ENSG00000154309	DISP1	WDR72	2067.75	1.4926	0.461666	3.23308	0.00122463	0.00479466	IPO8	3859.28	-0.148294	0.049905	-2.97153	0.00296317	0.00575332								CDK19	1502.28	1.13986	0.22426	5.08278	3.71943e-07	2.66965e-06	ANKRD6	57.3156	-0.765756	0.181049	-4.22955	2.34157e-05	6.50929e-05								RYK	1944.26	1.16157	0.194837	5.96173	2.49578e-09
ENSG00000091140	DLD	PRKCB	485.715	-2.33937	0.390862	-5.98515	2.16193e-09	3.66275e-08	E2F5	671.335	1.19215	0.0907203	13.1409	1.91811e-39	3.05276e-38								TTC39B	467.056	-1.30037	0.352127	-3.69288	0.000221726	0.000901583	CPM	749.798	-2.547	0.17664	-14.4192	3.92111e-47	2.38747e-45								RPN1	13324.5	0.924751	0.194108	4.7641	1.89696e-06
ENSG00000176124	DLEU1	FBXO22	1424.57	0.409049	0.113718	3.59706	0.000321831	0.00152038	SBF2	1933.84	-0.982697	0.0837096	-11.7394	8.00963e-32	9.42611e-31								SPAG17	118.92	4.95834	0.819362	6.05147	1.43529e-09	1.57915e-08	KIAA0513	626.031	-2.01944	0.144124	-14.0118	1.31997e-44	7.00131e-43								SHISA5	9328.83	0.791882	0.211043	3.75223	0.000175271
ENSG00000186047	DLEU7	FSTL5	40.5095	2.9922	0.812354	3.68337	0.000230174	0.00114203	NUMB	4036.68	-0.298636	0.0431216	-6.92545	4.34594e-12	1.83453e-11								ELMO1	966.288	-1.73126	0.33809	-5.12069	3.04417e-07	2.22749e-06	DOCK10	300.368	-1.33365	0.166549	-8.00757	1.17e-15	9.00017e-15								PRIMPOL	481.371	1.19399	0.227023	5.25934	1.4457e-07
ENSG00000263878	DLGAP1-AS4	NPIPB3	53.5727	0.948875	0.271736	3.4919	0.000479594	0.00213809	CTIF	2809.98	-1.25359	0.0734736	-17.0618	2.85517e-65	1.10016e-63								FAM122B	1132.63	0.938091	0.165585	5.6653	1.46769e-08	1.37136e-07	ANKRD36	83.4779	0.872468	0.174342	5.00435	5.60522e-07	1.89783e-06								CDCA7L	1426.93	2.94573	0.429688	6.85551	7.10584e-12
ENSG00000172869	DMXL1	KCNAB1	82.1426	-1.7065	0.206695	-8.25616	1.50435e-16	9.52781e-15	CHL1	752.858	-3.00192	0.173171	-17.335	2.55903e-67	1.06371e-65								NSMCE2	585.966	0.388254	0.127938	3.0347	0.00240774	0.00749193	STAB2	28.8218	-2.22069	0.184666	-12.0254	2.61246e-33	6.80514e-32								KIAA1324L	682.59	-2.1889	0.472986	-4.62783	3.69512e-06
ENSG00000105877	DNAH11	ZFPM2	219.224	-2.81212	0.351626	-7.99746	1.27011e-15	6.71286e-14	PTPN22	278.364	0.513935	0.121974	4.21349	2.51453e-05	6.22814e-05								VPS8	1072.01	0.434623	0.140309	3.09761	0.00195089	0.00624048	FLNB	14964.7	-1.10152	0.11237	-9.80261	1.09718e-22	1.41225e-21								CSMD3	180.17	-2.9118	0.807657	-3.60524	0.00031186
ENSG00000039139	DNAH5	SEMA3E	229.536	-2.46904	0.4429	-5.57472	2.47931e-08	3.31631e-07	ELP2	12659.4	0.790335	0.120452	6.56139	5.33088e-11	2.09774e-10								PTPDC1	207.081	0.84773	0.22636	3.74506	0.00018035	0.000746307	NUPL2	431.532	0.637073	0.0817899	7.78914	6.74663e-15	4.89354e-14								DDIAS	354.445	3.58596	0.369585	9.70267	2.93703e-22
ENSG00000115423	DNAH6	AKAP13	3447.65	-1.27977	0.171261	-7.47263	7.86064e-14	3.01121e-12	STT3A	11470.7	0.346257	0.0582905	5.94019	2.84687e-09	9.91271e-09								DYNC1I1	78.3276	1.7096	0.579336	2.95096	0.00316789	0.0094955	EPRS	5775.76	0.451112	0.0743895	6.06419	1.32616e-09	5.92545e-09								CASP7	688.817	1.26171	0.336165	3.75324	0.000174567
ENSG00000101152	DNAJC5	FAM86JP	173.571	0.614035	0.190383	3.22527	0.00125854	0.00491025	GOLM1	15349.7	1.36759	0.10272	13.3138	1.9249e-40	3.19464e-39								CCAR2	2878.85	0.579143	0.18282	3.16782	0.00153585	0.00507036	IL1RN	681.284	1.96134	0.233772	8.38994	4.86403e-17	4.18023e-16								BTRC	1349.34	-2.34291	0.212765	-11.0117	3.3554e-28
ENSG00000197959	DNM3	PRKCE	587.841	-0.562386	0.162209	-3.46705	0.000526201	0.00231974	FAM189A2	1039.14	-2.17645	0.15806	-13.7697	3.87659e-43	7.15584e-42								ALG8	1452.84	-0.639924	0.163015	-3.92554	8.65338e-05	0.000382589	HS6ST1	1046.29	-0.484297	0.106424	-4.55065	5.34798e-06	1.60965e-05								ARIH1	2446.45	-0.530909	0.149278	-3.5565	0.00037583
ENSG00000135905	DOCK10	CLCN5	598.554	0.622656	0.190452	3.26936	0.00107791	0.00429456	SDS	676.576	2.23237	0.117241	19.0408	7.83354e-81	4.91122e-79								CES5A	110.599	-4.51365	0.912117	-4.94854	7.47711e-07	5.07816e-06	UGGT1	3814.87	0.315491	0.0715721	4.40802	1.0432e-05	3.02911e-05								CDYL2	429.533	-2.66699	0.358648	-7.43624	1.03588e-13
ENSG00000206052	DOK6	COL24A1	119.201	-0.958389	0.307275	-3.11899	0.00181472	0.00669265	RNFT2	407	2.10098	0.107702	19.5074	9.50115e-85	6.59429e-83								AMFR	6831.07	-0.903683	0.219803	-4.11133	3.93386e-05	0.000189415	TEX10	1121.06	0.989968	0.0649773	15.2356	2.05257e-52	1.70757e-50								PKD1L2	56.3558	-2.1346	0.606037	-3.52223	0.000427932
ENSG00000189212	DPY19L2P1	THOP1	2614.07	0.906851	0.165749	5.47124	4.46896e-08	5.67977e-07	ANKRD6	431.103	-0.607195	0.0781745	-7.76718	8.0253e-15	4.00172e-14								AGPAT3	5355.66	-0.905972	0.219837	-4.12111	3.77059e-05	0.000182473	CMTR1	1717.53	0.234754	0.0594365	3.94966	7.82631e-05	0.000202107								PRKCB	1772.09	-4.65863	0.545121	-8.54605	1.27377e-17
ENSG00000113360	DROSHA	NEGR1	420.257	-4.19841	0.44236	-9.49093	2.28973e-21	3.73442e-19	CPM	2367.58	-2.13226	0.118778	-17.9516	4.663e-72	2.21632e-70								LSS	3070.49	-2.24036	0.256387	-8.73817	2.36911e-18	9.38364e-17	TINAG	278.233	-1.54472	0.234325	-6.59219	4.33376e-11	2.22204e-10								CLEC4D	7.31173	4.1979	1.25002	3.35826	0.000784362
ENSG00000244306	DUXAP10	MUCL1	59.0197	2.40202	0.648431	3.70436	0.000211922	0.00106476	KIAA0513	1327.41	0.459693	0.0795038	5.78203	7.3805e-09	2.49244e-08								PRMT2	2586.56	1.12784	0.194333	5.80368	6.48747e-09	6.41634e-08	NARS2	806.803	0.655887	0.0842802	7.78222	7.12622e-15	5.15656e-14								NNMT	5219.62	5.40776	0.754786	7.16462	7.80018e-13
ENSG00000206195	DUXAP8	DMXL1	1195.18	-0.919569	0.161928	-5.67887	1.35587e-08	1.92113e-07	ARMC9	1584.29	0.785787	0.0643038	12.2199	2.43375e-34	3.19094e-33								PSMC2	3190.92	-0.673377	0.152362	-4.41958	9.88919e-06	5.40554e-05	RDX	705.695	-0.845333	0.178159	-4.74482	2.08696e-06	6.61919e-06								AP1G1	3869.07	-0.581664	0.154624	-3.76179	0.000168701
ENSG00000004975	DVL2	SLC19A1	1507.76	1.78117	0.202074	8.81444	1.20281e-18	1.15716e-16	ANKRD36	246.401	-0.445662	0.09844	-4.52724	5.97586e-06	1.57584e-05								CELF5	94.8661	2.09527	0.672046	3.11775	0.00182235	0.00587878	LRRC49	174.185	0.500284	0.119479	4.18721	2.82407e-05	7.76644e-05								YWHAB	16184.4	-1.20202	0.152182	-7.89857	2.82117e-15
ENSG00000158560	DYNC1I1	XXYLT1	1256.93	0.706704	0.150592	4.69284	2.69433e-06	2.2617e-05	STAB2	56.6472	-2.98083	0.15575	-19.1386	1.20399e-81	7.72986e-80								GBP2	4461.06	1.79433	0.327736	5.47494	4.37658e-08	3.75685e-07	TMEM62	1152.8	0.37266	0.0886878	4.20193	2.64648e-05	7.30907e-05								MVD	1372.41	-1.09905	0.268261	-4.09694	4.1865e-05
ENSG00000187240	DYNC2H1	CNTNAP2	254.302	2.41958	0.711265	3.4018	0.000669442	0.00285504	FLNB	37388.9	0.429584	0.0878837	4.8881	1.01814e-06	2.87922e-06								TDRD5	78.614	5.60528	1.02216	5.48375	4.16393e-08	3.5835e-07	DBR1	594.408	0.364677	0.0601863	6.05914	1.36849e-09	6.10489e-09								TRAPPC9	2215.53	-0.825899	0.205807	-4.01298	5.99562e-05
ENSG00000133740	E2F5	DENND4A	1045.1	-0.627987	0.126123	-4.97914	6.38665e-07	6.23169e-06	LMO7	2196.38	0.573884	0.0982904	5.83866	5.26225e-09	1.79809e-08								SPATA17	108.72	4.71685	0.560325	8.41806	3.82764e-17	1.31798e-15	AOX1	120.487	-1.98171	0.231825	-8.54828	1.24933e-17	1.12406e-16								IRF2	1659.05	0.785287	0.222073	3.53616	0.000405987
ENSG00000114346	ECT2	GLMN	522.578	0.497042	0.133105	3.7342	0.000188313	0.000961062	EPRS	14862	0.796445	0.0658947	12.0866	1.24277e-33	1.57924e-32								BROX	2556.95	0.848904	0.192517	4.4095	1.03608e-05	5.63939e-05	SENP7	305.548	-0.378323	0.115393	-3.27856	0.0010434	0.00226755								FSTL5	90.7392	-4.59381	0.812721	-5.65238	1.58245e-08
ENSG00000183690	EFHC2	PCCA	824.569	-0.893541	0.174048	-5.13388	2.83823e-07	3.01863e-06	IL1RN	861.13	0.69555	0.136542	5.09404	3.5051e-07	1.03325e-06								ERCC3	2021.82	0.739763	0.0942499	7.84895	4.19529e-15	1.0944e-13	SECISBP2L	1002.75	-1.09304	0.104351	-10.4746	1.12989e-25	1.78452e-24								KCNAB1	367.992	-3.49822	0.367095	-9.52946	1.581e-21
ENSG00000149100	EIF3M	DLEU1	230.853	1.08227	0.2517	4.29986	1.7091e-05	0.000117361	SAP130	2221.21	0.21294	0.0429271	4.9605	7.03119e-07	2.01778e-06								STK36	1174.99	1.29946	0.216644	5.99813	1.99599e-09	2.14665e-08	TMOD3	2490.4	-0.561858	0.0856892	-6.55694	5.49248e-11	2.79045e-10								STK32A	1362.7	1.73099	0.395314	4.37878	1.19347e-05
ENSG00000075151	EIF4G3	ACAD9	2368.05	0.430355	0.105745	4.06973	4.70685e-05	0.000286505	HS6ST1	4215.19	0.703771	0.0681531	10.3263	5.3575e-25	4.57454e-24								ALB	2.77911e+06	-6.01514	0.773615	-7.77537	7.52278e-15	1.89024e-13	PRKG2	71.5969	-4.15252	0.200579	-20.7026	3.27933e-95	1.90568e-92								PTK2	5433.37	-1.13137	0.179284	-6.31047	2.78193e-10
ENSG00000155849	ELMO1	PDE4DIP	2205.8	0.563565	0.171101	3.29375	0.000988591	0.00398985	UGGT1	6770.44	0.354725	0.0560358	6.33032	2.44646e-10	9.1995e-10								RYK	2003.81	0.461365	0.151139	3.05259	0.00226879	0.00711128	ENPEP	156.41	0.504099	0.149077	3.38146	0.000721017	0.00160725								FAM153A	26.5897	-4.60325	0.89553	-5.14025	2.74375e-07
ENSG00000115459	ELMOD3	FAM220A	983.042	0.463563	0.118907	3.89853	9.67766e-05	0.000538291	CMTR1	3680.28	0.182191	0.0437346	4.16584	3.10212e-05	7.61415e-05								RPN1	15522.5	-0.638717	0.202262	-3.15787	0.00158925	0.00522221	PAPSS1	1742.17	0.367995	0.0691696	5.32019	1.0366e-07	3.80514e-07								PRKCE	990.107	-3.60157	0.312659	-11.5191	1.05654e-30
ENSG00000134759	ELP2	PFAS	1229.45	0.508116	0.154379	3.29135	0.000997079	0.00402016	NARS2	1173.76	0.449058	0.0876438	5.12367	2.99647e-07	8.88681e-07								TMEM184C	1211.52	-0.620999	0.179645	-3.4568	0.000546624	0.00202199	AEBP2	955.477	0.326851	0.0701834	4.6571	3.20692e-06	9.93918e-06								COL24A1	64.64	-2.20963	0.676121	-3.2681	0.00108272
ENSG00000138792	ENPEP	CDH5	1264.12	-0.973142	0.254866	-3.81825	0.000134404	0.000715735	RDX	3882.01	-0.610016	0.0813025	-7.50305	6.23492e-14	2.95047e-13								PRMT9	298.202	-0.808436	0.184557	-4.38041	1.18454e-05	6.37999e-05	GIT2	408.178	-0.313627	0.0696294	-4.50424	6.66124e-06	1.98018e-05								NEGR1	731.572	-4.22737	0.678188	-6.23333	4.5662e-10
ENSG00000183495	EP400	NRXN1	55.2536	-3.56284	0.709498	-5.02164	5.12334e-07	5.10735e-06	NUSAP1	6.95234	0.712218	0.116259	6.12611	9.00541e-10	3.25294e-09								ADGRV1	328.761	-3.74642	0.503273	-7.4441	9.76066e-14	2.07416e-12	CSAD	295.249	0.488312	0.131048	3.72619	0.000194394	0.000473388								MACROD2	183.302	-3.42064	0.61689	-5.54498	2.93988e-08
ENSG00000129595	EPB41L4A	PCGF5	1730.29	-0.90773	0.147294	-6.1627	7.15159e-10	1.34872e-08	TMEM62	1670.16	0.441655	0.0763493	5.78466	7.26582e-09	2.45499e-08								KLKB1	3631.26	-5.13159	0.539067	-9.51938	1.74207e-21	1.07376e-19	BCL2A1	168.563	0.847499	0.230667	3.67412	0.000238668	0.000574338								CERS6	746.74	-1.16297	0.30585	-3.80243	0.000143285
ENSG00000115109	EPB41L5	CXCR2	130.851	-2.54067	0.426555	-5.95625	2.58093e-09	4.2979e-08	SLC44A5	465.432	0.599183	0.199239	3.00736	0.0026353	0.00515643								CDCA7L	397.417	1.53265	0.352617	4.3465	1.38324e-05	7.34735e-05	SCAPER	386.128	-0.692936	0.0894044	-7.75057	9.14787e-15	6.56652e-14								CBWD1	408.197	0.795235	0.252478	3.14973	0.00163423
ENSG00000080224	EPHA6	AP1S2	681.338	-0.944304	0.204671	-4.61378	3.9542e-06	3.18018e-05	DBR1	1214.25	0.281125	0.0404205	6.95502	3.52512e-12	1.49821e-11								KIAA1324L	356.85	1.44828	0.474305	3.05347	0.00226211	0.00709499	UQCRC2	9864.98	-0.552511	0.0768099	-7.19324	6.32731e-13	3.85492e-12								DMXL1	1231.22	-1.30789	0.170864	-7.65458	1.93945e-14
ENSG00000154928	EPHB1	PLCB1	1015.99	-0.997874	0.220296	-4.52971	5.90652e-06	4.56299e-05	AOX1	943.837	-2.33278	0.171212	-13.6251	2.83948e-42	5.06034e-41								SPIDR	1753.13	-0.602446	0.155295	-3.87937	0.000104729	0.000454923	NUDT7	53.8793	-0.625411	0.104012	-6.01284	1.82297e-09	8.04067e-09								TOMM20	10741.3	-0.981082	0.182722	-5.36927	7.90572e-08
ENSG00000136628	EPRS	CTNNA3	52.3349	-3.40742	0.565058	-6.03022	1.6374e-09	2.84772e-08	SENP7	1212.59	-0.407582	0.0632348	-6.44554	1.15188e-10	4.4328e-10								DDIAS	101.869	1.69185	0.342982	4.93276	8.10759e-07	5.46972e-06	MBTPS1	4094.61	-0.19107	0.047484	-4.02389	5.72444e-05	0.000150594								XXYLT1	1155	0.756019	0.213875	3.53487	0.000407975
ENSG00000127527	EPS15L1	CCR3	59.9389	3.05146	0.461747	6.60851	3.88196e-11	9.45026e-10	SECISBP2L	3771.56	-0.697956	0.0737471	-9.46418	2.95864e-21	2.09771e-20								FAM227B	126.265	-0.685978	0.201557	-3.40339	0.00066555	0.00241205	ABCA8	160.452	-4.61301	0.290426	-15.8836	8.2302e-57	8.8617e-55								CNTNAP2	879.241	-4.44144	0.732652	-6.06214	1.3432e-09
ENSG00000163161	ERCC3	EFHC2	41.7771	-1.50478	0.45316	-3.32064	0.000898101	0.0036752	PRKG2	116.996	-0.607959	0.147915	-4.11019	3.95328e-05	9.59077e-05								CDYL2	570.609	0.731756	0.240596	3.04143	0.0023546	0.00734789	OSBPL1A	717.756	-1.57116	0.14763	-10.6425	1.88896e-26	3.13631e-25								DENND4A	1014.83	-0.800124	0.193672	-4.13134	3.60658e-05
ENSG00000113719	ERGIC1	ST6GALNAC3	92.2129	-1.47165	0.332817	-4.42179	9.78849e-06	7.15747e-05	PPA2	3602.25	0.314364	0.0524947	5.98849	2.11794e-09	7.45236e-09								NNMT	22070.8	-3.23313	0.54185	-5.96684	2.41898e-09	2.571e-08	VAV1	318.903	-0.933474	0.162039	-5.7608	8.37185e-09	3.44642e-08								ANKRD36C	110.553	-1.859	0.321017	-5.79098	6.9978e-09
ENSG00000104626	ERI1	PPP1R2	2629.55	-0.399635	0.105105	-3.80225	0.000143388	0.000757105	ENPEP	678.12	-0.684702	0.104677	-6.54107	6.10807e-11	2.39567e-10								YWHAB	11217.6	0.712143	0.125778	5.66191	1.49701e-08	1.39641e-07	ITGB3BP	461.633	0.708729	0.109385	6.47924	9.21852e-11	4.60297e-10								IL20RB	43.1916	1.67512	0.364833	4.59147	4.40125e-06
ENSG00000212766	EWSAT1	RPL23AP82	295.879	-0.434579	0.136858	-3.17539	0.00149637	0.00567443	FBN2	721.366	2.93073	0.179524	16.325	6.55757e-60	2.09616e-58								MVD	1900.33	-0.790418	0.253344	-3.11994	0.00180887	0.00584428	XCL1	13.6632	-1.2552	0.28268	-4.44034	8.98188e-06	2.62988e-05								SUGCT	182.335	1.50138	0.377359	3.97865	6.93068e-05
ENSG00000081177	EXD2	MAP7D2	101.983	2.10368	0.519069	4.0528	5.06089e-05	0.000305171	AEBP2	1868.42	-0.238447	0.0559615	-4.26092	2.03588e-05	5.0915e-05								DAPK3	2811.52	0.895354	0.201297	4.44792	8.67059e-06	4.79663e-05	FCRL5	150.056	-1.58642	0.284244	-5.58119	2.38881e-08	9.36469e-08								DLEU1	238.401	0.9869	0.270963	3.64219	0.00027033
ENSG00000131558	EXOC4	ANKS1B	38.2995	-3.35808	0.452804	-7.41619	1.20541e-13	4.49527e-12	TMEM117	330.108	-0.491146	0.0750751	-6.54206	6.06761e-11	2.38063e-10								IRF2	1440.57	-0.773405	0.1884	-4.10513	4.0409e-05	0.000194038	INTS3	2184.37	0.349893	0.069755	5.01603	5.27492e-07	1.79183e-06								LRRTM4	304.043	-2.2334	0.700552	-3.18806	0.00143231
ENSG00000070367	EXOC5	PBX1	4796.31	-1.51804	0.256893	-5.90922	3.43725e-09	5.58917e-08	GIT2	891.753	-0.390575	0.0558872	-6.98862	2.77597e-12	1.18748e-11								STK32A	162.923	3.00936	0.652822	4.60977	4.03116e-06	2.38204e-05	CDC42BPA	1683.08	-0.823103	0.106495	-7.72905	1.08352e-14	7.73838e-14								OR4N2	61.0091	5.41561	1.39128	3.89255	9.91971e-05
ENSG00000144036	EXOC6B	RASA3	933.376	-1.14442	0.29263	-3.91081	9.19866e-05	0.000514965	C14orf37	385.59	-0.30377	0.10421	-2.91498	0.00355709	0.00683023								FAM153A	55.609	3.14846	0.818105	3.84848	0.000118854	0.000510598	PARP1	5530.83	0.356084	0.0702646	5.06775	4.02541e-07	1.38453e-06								FKBP9P1	220.281	3.19723	0.599986	5.32883	9.88466e-08
ENSG00000075914	EXOSC7	DLEU7	15.075	1.3098	0.3399	3.85348	0.000116451	0.000632724	SLC38A6	534.702	0.166887	0.0578039	2.88712	0.00388786	0.00742266								SEMA3E	1125.98	4.14206	0.70416	5.88227	4.04673e-09	4.14443e-08	EXOC6B	640.388	-0.909597	0.0757479	-12.0082	3.21684e-33	8.28661e-32								SHMT1	1020.54	1.10533	0.227786	4.8525	1.21912e-06
ENSG00000165591	FAAH2	NKRF	681.806	0.596899	0.106027	5.62967	1.80553e-08	2.49046e-07	BCL2A1	269.846	1.37877	0.167117	8.25031	1.57989e-16	8.69562e-16								PFKFB3	7693.81	1.14015	0.376917	3.02494	0.00248683	0.00769666	ZC3H8	481.305	1.04594	0.0892574	11.7183	1.02718e-31	2.37508e-30								NR2C2	1971.33	-0.884368	0.224823	-3.93361	8.36791e-05
ENSG00000185104	FAF1	RPS23	4860.45	-0.587227	0.176875	-3.32	0.000900161	0.00368174	SCAPER	1005.16	-0.61934	0.06437	-9.62156	6.48374e-22	4.76219e-21								SOCS6	1712.8	-1.27297	0.273523	-4.65396	3.25615e-06	1.96113e-05	SPAG16	293.964	-0.663253	0.206874	-3.20608	0.00134558	0.00287105								CD163	7506.84	4.28976	0.680285	6.30583	2.86653e-10
ENSG00000197712	FAM114A1	CMC1	797.438	0.720561	0.119867	6.01134	1.83993e-09	3.1695e-08	MFGE8	11889.4	-0.932294	0.145516	-6.40679	1.48615e-10	5.67684e-10								PKHD1	3917.48	2.5845	0.532327	4.85509	1.2033e-06	7.85512e-06	SHQ1	766.068	0.271004	0.0600446	4.51337	6.38043e-06	1.90171e-05								SH2D4B	6.74089	-1.57789	0.434839	-3.62869	0.000284867
ENSG00000156504	FAM122B	DYNC2H1	535.443	-1.08777	0.270839	-4.01631	5.91168e-05	0.000349922	CRTC3	3344.18	-0.268517	0.0464306	-5.7832	7.3291e-09	2.47526e-08								FAM86JP	78.527	0.957966	0.30599	3.13071	0.00174383	0.00565379	IGSF11	7.4859	-3.16398	0.323552	-9.77889	1.38722e-22	1.76659e-21								GALNT11	2216.48	-0.98358	0.214082	-4.59441	4.3397e-06
ENSG00000156500	FAM122C	C2orf88	163.069	-1.61553	0.328193	-4.92249	8.54489e-07	8.04345e-06	UQCRC2	10489.2	-0.361572	0.0490319	-7.37423	1.653e-13	7.61025e-13								PRKCE	571.968	-1.25585	0.291178	-4.31299	1.61065e-05	8.44668e-05	MUC4	3459.24	-1.37361	0.275487	-4.98613	6.16019e-07	2.07879e-06								GAK	3280.99	-0.854829	0.186717	-4.57821	4.68963e-06
ENSG00000170074	FAM153A	GPR89B	182.692	0.875008	0.161868	5.4057	6.45556e-08	7.94937e-07	NUDT7	58.8338	-1.63823	0.0933602	-17.5474	6.22445e-69	2.70368e-67								CLCN5	1627.44	-1.60511	0.351178	-4.57066	4.86194e-06	2.82459e-05	CAMK2D	1925.34	-0.960728	0.0974004	-9.86369	5.98079e-23	7.8413e-22								NRXN1	2643.38	-2.65257	0.54255	-4.88907	1.01311e-06
ENSG00000182230	FAM153B	COL4A5	3466.27	-0.935343	0.312904	-2.98923	0.00279678	0.00964169	MBTPS1	10327.3	-0.228975	0.0547241	-4.18417	2.8621e-05	7.05131e-05								COL24A1	18.3129	1.69502	0.508906	3.33071	0.000866242	0.00304989	USP53	1631.82	-0.834275	0.109927	-7.58939	3.21426e-14	2.20167e-13								CXCR2	95.2783	3.51817	0.580626	6.05927	1.36742e-09
ENSG00000186973	FAM183A	RBM34	46.5127	0.585755	0.158385	3.69829	0.000217053	0.00108557	VPS53	2529.36	-0.191592	0.0454484	-4.21559	2.49124e-05	6.17282e-05								THOP1	2007.3	-1.1779	0.21357	-5.51529	3.48202e-08	3.04361e-07	PRIM2	553.654	0.751815	0.0797145	9.43135	4.04858e-21	4.67106e-20								RAD51B	192.012	0.902508	0.238497	3.78415	0.000154233
ENSG00000135063	FAM189A2	ADAT2	448.613	0.823957	0.185137	4.45053	8.56567e-06	6.35378e-05	ARSG	1098.6	0.710382	0.112338	6.3236	2.55533e-10	9.58665e-10								FGGY	1285.09	-2.08117	0.335639	-6.20063	5.6236e-10	6.64371e-09	GABRR1	11.5422	1.6598	0.510439	3.25171	0.00114714	0.00247544								FAM153B	2.01997	-5.24756	0.995785	-5.26977	1.36595e-07
ENSG00000160256	FAM207A	SRGAP3	667.355	-0.972056	0.326365	-2.97843	0.00289726	0.00993525	ABCA8	1004.6	-3.97761	0.180526	-22.0334	1.3785e-107	1.719e-105								IQCB1	636.228	0.899089	0.204895	4.38804	1.14375e-05	6.17624e-05	AIG1	1236.35	0.35564	0.0851061	4.17879	2.93068e-05	8.0378e-05								AP1S2	4953.51	1.01839	0.321961	3.16309	0.00156104
ENSG00000178397	FAM220A	GRM7	12.1054	-1.96633	0.558593	-3.52015	0.000431305	0.00195538	OSBPL1A	3986.93	-0.952476	0.0781141	-12.1934	3.37094e-34	4.38802e-33								UGT2A1	4.55485	-5.79745	0.725496	-7.99101	1.33834e-15	3.76095e-14	LINC00525	22.211	1.65037	0.235765	7.00007	2.55836e-12	1.47113e-11								PLCB1	1291.22	-2.53134	0.456819	-5.54123	3.00354e-08
ENSG00000166262	FAM227B	STK31	123.19	2.127	0.335766	6.33478	2.37674e-10	4.93004e-09	FBXO15	126.413	0.719392	0.134362	5.35411	8.59765e-08	2.66897e-07								SLC19A1	1116.81	-1.46951	0.296337	-4.95891	7.08913e-07	4.82837e-06	LANCL3	80.7022	-1.7166	0.179546	-9.56078	1.16874e-21	1.39445e-20								AP2A2	5219.51	-1.63595	0.19283	-8.4839	2.17774e-17
ENSG00000171084	FAM86JP	MMP1	4505.62	2.73508	0.552962	4.94624	7.56594e-07	7.21851e-06	VAV1	718.664	0.472788	0.10675	4.42894	9.46961e-06	2.44726e-05								TOMM20	10641.7	0.595425	0.202388	2.94199	0.00326106	0.00972681	ZNF182	254.957	0.747747	0.0973458	7.68135	1.57423e-14	1.10788e-13								CAMK1D	2092.5	-3.52034	0.314905	-11.179	5.16445e-29
ENSG00000223839	FAM95B1	MVB12B	739.201	-1.01326	0.209775	-4.83024	1.36368e-06	1.22306e-05	ITGB3BP	863.482	0.367447	0.0593128	6.19507	5.82596e-10	2.13435e-09								XXYLT1	487.85	1.52211	0.209357	7.27041	3.58402e-13	7.05194e-12	NXF3	86.7848	2.80445	0.438179	6.40024	1.55136e-10	7.56365e-10								CTNNA3	273.762	-2.33297	0.682614	-3.4177	0.000631522
ENSG00000203780	FANK1	SLC39A10	1290.49	0.731507	0.184796	3.95846	7.54357e-05	0.000431852	FCRL5	271.256	0.645288	0.222759	2.8968	0.00376991	0.00721295								ANKRD36C	81.3188	1.51754	0.333953	4.54418	5.51504e-06	3.16935e-05	TRIM55	1.51632	-1.99824	0.28816	-6.93447	4.07738e-12	2.29453e-11								KCNH8	268.248	-3.21193	0.744703	-4.31303	1.61029e-05
ENSG00000006607	FARP2	KANK2	4273.25	-2.88428	0.254741	-11.3224	1.01643e-29	7.72504e-27	INTS3	7092.21	0.41025	0.0524371	7.82366	5.13079e-15	2.58826e-14								GLMN	234.204	0.663058	0.216304	3.0654	0.00217376	0.00685643	GSDMC	13.3767	2.89277	0.260827	11.0907	1.3914e-28	2.64212e-27								MAP7D2	363.977	-4.81743	0.712291	-6.76329	1.34891e-11
ENSG00000138829	FBN2	SVIL	5376.76	-3.03245	0.255139	-11.8855	1.4078e-32	1.84475e-29	CDC42BPA	4431.58	-0.404697	0.0887809	-4.55838	5.15488e-06	1.36705e-05								PCCA	1993.63	-1.69988	0.271712	-6.25619	3.94501e-10	4.77007e-09	UHRF2	1187.05	0.426406	0.075338	5.65991	1.51453e-08	6.05505e-08								NELL2	2965.53	-3.17866	0.522214	-6.0869	1.15118e-09
ENSG00000153558	FBXL2	DCHS2	32.5921	-3.13824	0.534601	-5.87024	4.35152e-09	6.91913e-08	PARP1	16928.4	1.1776	0.0584081	20.1617	2.1255e-90	1.73211e-88								SUGCT	445.043	-2.39979	0.420513	-5.70682	1.15107e-08	1.09445e-07	HAUS6	801.167	1.00509	0.101606	9.89205	4.50687e-23	5.95033e-22								SLC22A10	2.22673	-5.03844	0.818806	-6.1534	7.58383e-10
ENSG00000141665	FBXO15	FAM114A1	3007.94	-0.708825	0.151454	-4.68013	2.86698e-06	2.3866e-05	WDPCP	491.976	-1.0728	0.051242	-20.9359	2.52415e-97	2.45866e-95								LRRTM4	17.0584	-3.44097	0.915975	-3.75661	0.000172229	0.000715887	CBWD5	138.511	0.655965	0.108291	6.05745	1.38294e-09	6.16588e-09								AP3M1	2004.52	0.54234	0.146191	3.7098	0.000207425
ENSG00000167196	FBXO22	NUP62CL	119.244	1.33304	0.302243	4.41049	1.03136e-05	7.49959e-05	ASXL2	3243.72	-0.28741	0.0629134	-4.56835	4.91588e-06	1.30668e-05								SHMT1	9715.95	-4.14503	0.390391	-10.6176	2.46726e-26	3.00279e-24	PLEKHS1	1139.95	1.63864	0.178734	9.16804	4.81703e-20	5.14877e-19								BRF1	1934.75	-0.939276	0.235817	-3.98307	6.80294e-05
ENSG00000037637	FBXO42	UVRAG	1143.79	-0.373412	0.124131	-3.00821	0.00262792	0.00913331	EXOC6B	2153.58	-0.580055	0.0541381	-10.7144	8.71576e-27	8.09861e-26								CLVS1	123.254	6.29734	0.95568	6.58939	4.41642e-11	6.28725e-10	MTG1	171.997	1.16216	0.143615	8.09222	5.8586e-16	4.61172e-15								ANKS1B	1049.08	-3.47319	0.592419	-5.86272	4.55335e-09
ENSG00000112146	FBXO9	ZNF587	889.233	0.605983	0.168864	3.58859	0.000332466	0.00156343	UBR3	3708.6	-0.63597	0.0637324	-9.97875	1.88821e-23	1.48798e-22								CD163	1215.44	-2.06854	0.461236	-4.48477	7.29943e-06	4.09838e-05	GSTO1	3622.49	0.333946	0.10187	3.27816	0.00104488	0.00227026								SP140L	485.069	2.22532	0.394694	5.63809	1.71948e-08
ENSG00000143297	FCRL5	DDX39B	3292.15	0.555871	0.185141	3.00243	0.00267834	0.00928686	SHQ1	1458.51	0.365249	0.0489686	7.45886	8.72766e-14	4.08663e-13								ACAD9	1650.77	-0.541671	0.167893	-3.22628	0.00125411	0.0042372	ADAM12	755.502	4.10817	0.261079	15.7353	8.65927e-56	8.70686e-54								DLEU7	137.942	-1.46714	0.412475	-3.55691	0.000375242
ENSG00000149557	FEZ1	C1orf53	120.734	1.51558	0.22185	6.83154	8.40073e-12	2.30163e-10	UBA3	2810.05	0.169956	0.0416973	4.07594	4.58281e-05	0.000110484								PDE4DIP	2371.12	-1.08561	0.283334	-3.83155	0.000127337	0.000543116	EIF3M	4653.47	0.698999	0.0701667	9.96197	2.2358e-23	3.0133e-22								NKRF	527.677	-1.45537	0.142956	-10.1806	2.42046e-24
ENSG00000230316	FEZF1-AS1	FANK1	208.247	0.908264	0.223237	4.06861	4.72953e-05	0.000287701	MUC4	106.122	-0.908754	0.204674	-4.44	8.99597e-06	2.33122e-05								SH2D4B	5.53604	3.19542	0.785948	4.06569	4.78906e-05	0.000225862	CCDC15	79.9404	0.453195	0.109168	4.15136	3.30504e-05	8.99525e-05								GLDN	1433.74	-2.04038	0.541839	-3.76565	0.000166116
ENSG00000127084	FGD3	SPRR2E	155.015	6.22679	0.99938	6.23065	4.645e-10	9.1175e-09	CAMK2D	2692.48	-0.571213	0.098138	-5.8205	5.86707e-09	1.99769e-08								FAM220A	560.298	0.416177	0.11172	3.72517	0.000195181	0.000801536	FEZ1	174.396	-1.55819	0.154069	-10.1136	4.81031e-24	6.77904e-23								FAM183A	118.216	4.99831	0.996705	5.01483	5.30796e-07
ENSG00000231383	FGF12-AS1	GIGYF2	2191.62	-0.636016	0.114836	-5.53846	3.05149e-08	4.0069e-07	USP53	2647.03	-1.23099	0.0841537	-14.6279	1.86411e-48	4.12148e-47								GPC5	17.7557	-3.41849	0.536234	-6.37499	1.82973e-10	2.34274e-09	PDCD4	3348.52	-2.0939	0.0949977	-22.0416	1.14999e-107	8.57413e-105								AGMO	320.188	3.3502	0.628478	5.33066	9.78578e-08
ENSG00000172456	FGGY	LCMT1	1782.08	0.501135	0.140416	3.56892	0.000358456	0.00166708	PDGFC	1985.15	-0.686669	0.0920457	-7.46008	8.64696e-14	4.05051e-13								CDH5	1282.95	-0.929582	0.292786	-3.17496	0.0014986	0.00496053	GPM6A	76.7285	-4.27091	0.422011	-10.1204	4.48633e-24	6.33375e-23								SECISBP2	1669.34	-0.584989	0.181255	-3.22743	0.00124907
ENSG00000176826	FKBP9P1	DOK6	161.85	-3.64299	0.422932	-8.61366	7.0763e-18	5.73362e-16	NDUFS6	3144.09	0.927512	0.0903841	10.2619	1.04638e-24	8.80869e-24								PCGF5	2538.11	-0.937535	0.202143	-4.63799	3.51819e-06	2.10569e-05	PPP1R1C	21.4986	1.02181	0.240006	4.25746	2.0676e-05	5.78923e-05								RILPL1	816.323	-1.31773	0.178292	-7.39086	1.45886e-13
ENSG00000136068	FLNB	TMEM191C	45.6428	2.45222	0.401655	6.10528	1.0262e-09	1.85875e-08	PRIM2	942.613	0.918869	0.0676442	13.5838	4.99324e-42	8.79503e-41								RPH3AL	753.837	-0.811911	0.204922	-3.96206	7.43059e-05	0.000334537	UBE3B	1873.23	-0.4957	0.0513173	-9.6595	4.48052e-22	5.51221e-21								GPR89B	178.33	0.720063	0.178362	4.03709	5.41181e-05
ENSG00000155816	FMN2	DUXAP8	276.807	2.77808	0.40477	6.86336	6.72603e-12	1.88495e-10	GABRR1	6.84409	-1.06458	0.223025	-4.77335	1.81187e-06	5.00227e-06								RFX7	792.834	0.718078	0.192333	3.73352	0.000188821	0.000778197	FRMD4A	265.925	-0.625604	0.129676	-4.82435	1.40461e-06	4.53617e-06								COL4A5	1466.88	-1.8749	0.506222	-3.7037	0.000212478
ENSG00000076258	FMO4	CD200R1L	3.62143	2.57355	0.663331	3.87974	0.000104569	0.000575485	AIG1	2901.25	-0.280525	0.0748709	-3.74678	0.000179121	0.000404622								PLCB1	636.23	1.37194	0.430599	3.18613	0.0014419	0.00479902	AKR1C2	135.866	-1.65368	0.228705	-7.23062	4.80791e-13	2.95519e-12								FOCAD	1159.27	-1.44029	0.372307	-3.86855	0.000109487
ENSG00000188352	FOCAD	EWSAT1	6.7811	1.59809	0.455531	3.5082	0.000451151	0.00202983	LANCL3	38.8795	-0.793124	0.145296	-5.45869	4.79666e-08	1.52066e-07								MCEMP1	15.0175	2.10782	0.664623	3.17145	0.00151681	0.00501393	ITIH2	11.4075	1.4032	0.325538	4.31041	1.62955e-05	4.62096e-05								HLA-DRB1	14798.4	2.49707	0.485783	5.14029	2.74314e-07
ENSG00000151474	FRMD4A	C17orf67	120.021	0.662042	0.217943	3.03768	0.00238406	0.00842341	ZNF711	555.66	-0.580476	0.147754	-3.92865	8.54231e-05	0.000200095								CTNNA3	108.636	-4.62078	0.475189	-9.72409	2.38017e-22	1.70582e-20	CENPU	747.669	0.988721	0.133321	7.41609	1.20629e-13	7.83496e-13								SRGAP3	1925.73	-2.09318	0.319056	-6.56053	5.36152e-11
ENSG00000106701	FSD1L	LRRC69	51.9881	1.1818	0.251601	4.69711	2.63867e-06	2.22086e-05	DIAPH2	1251.65	-1.18282	0.0807011	-14.6568	1.21895e-48	2.70824e-47								PLGLB1	59.8763	-3.92461	0.480292	-8.17129	3.05104e-16	9.46389e-15	RABGAP1L	1535.58	-0.354844	0.0889166	-3.99075	6.5865e-05	0.000171978								GRM7	99.2727	-4.18477	0.824235	-5.07716	3.8312e-07
ENSG00000053108	FSTL4	CBWD6	138.548	0.592954	0.193264	3.0681	0.00215426	0.00772986	CXorf57	118.066	-0.526346	0.151859	-3.46601	0.000528252	0.00113183								NPIPA1	178.428	0.8095	0.266516	3.03735	0.0023867	0.00743697	HAUS1	626.425	0.391707	0.10501	3.7302	0.000191327	0.000466524								STK31	21.0033	-1.83187	0.466681	-3.92531	8.66185e-05
ENSG00000168843	FSTL5	TMLHE-AS1	2.14494	1.36276	0.432618	3.15004	0.00163249	0.00611075	TRIM55	42.5197	-0.826984	0.268579	-3.07911	0.00207623	0.00412421								EP400	1771.95	0.574824	0.142044	4.04681	5.19205e-05	0.000242462	POC5	336.511	0.700629	0.0743147	9.42786	4.18542e-21	4.8233e-20								ADH7	3.27704	4.19123	1.23601	3.39094	0.000696521
ENSG00000033170	FUT8	GBP1P1	301.159	1.51881	0.343907	4.41634	1.00388e-05	7.31934e-05	MAL2	14027.7	1.76199	0.104408	16.8761	6.75127e-64	2.50161e-62								EFHC2	16.3492	3.06743	0.852753	3.59709	0.000321795	0.00125776	XRCC4	312.072	0.335911	0.110182	3.04869	0.00229843	0.00471157								PIK3R4	1257.21	-0.551338	0.159616	-3.45416	0.000552002
ENSG00000114416	FXR1	HSBP1L1	796.25	1.08349	0.195478	5.5428	2.9767e-08	3.91682e-07	NDUFB9	6976.41	0.913344	0.0926561	9.85735	6.37072e-23	4.88882e-22								KCNH8	126.615	3.01192	0.770111	3.91102	9.19081e-05	0.000404374	BOLL	0.92112	1.41873	0.498503	2.84598	0.00442751	0.00862581								GDAP2	497.412	0.550522	0.166845	3.2996	0.000968244
ENSG00000092140	G2E3	SLC8A1-AS1	16.8478	1.83964	0.509009	3.61415	0.000301331	0.00143765	GSDMC	227.523	2.1836	0.213855	10.2107	1.77668e-24	1.47729e-23								ST6GALNAC3	77.2502	-1.27193	0.314423	-4.04527	5.22619e-05	0.000243818	DCLRE1C	542.612	0.400661	0.0880507	4.55034	5.35581e-06	1.61188e-05								MMP1	71.7622	3.3237	0.932071	3.56593	0.00036257
ENSG00000154727	GABPA	LYPLAL1-AS1	13.1101	-2.5359	0.422004	-6.00918	1.86462e-09	3.20623e-08	HAUS6	1537.86	0.247748	0.0676126	3.66423	0.00024808	0.00055149								RPL23AP82	247.918	0.894267	0.230456	3.88042	0.000104278	0.000453139	TRIM36	311.294	-1.56471	0.15885	-9.85022	6.83923e-23	8.9401e-22								NF1	3251.67	-1.12307	0.259215	-4.3326	1.4736e-05
ENSG00000011677	GABRA3	MIR4500HG	11.4017	2.65779	0.781118	3.40255	0.00066761	0.00284866	CBWD5	504.436	0.756417	0.092752	8.15526	3.48433e-16	1.88103e-15								MAP7D2	143.098	2.85829	0.654465	4.36737	1.2575e-05	6.73936e-05	TMEM123	11901.6	0.68543	0.0980978	6.98721	2.80405e-12	1.60447e-11								MVB12B	3016.42	-1.44258	0.365598	-3.94581	7.95305e-05
ENSG00000113327	GABRG2	FEZF1-AS1	106.572	2.52501	0.608291	4.15099	3.31038e-05	0.000210435	SEC16A	14799.1	0.742338	0.0664673	11.1685	5.81767e-29	5.97308e-28								SLC22A10	1128.19	-6.32061	0.982529	-6.433	1.25109e-10	1.64918e-09	UTRN	2009.23	-0.482164	0.144154	-3.34479	0.000823451	0.00181876								SLC39A10	2753.29	-1.56862	0.233602	-6.71491	1.88186e-11
ENSG00000146276	GABRR1	TRAF3IP2-AS1	74.9669	-0.712781	0.155308	-4.58946	4.44389e-06	3.52551e-05	MTG1	175.375	0.719092	0.0849025	8.46962	2.46188e-17	1.41524e-16								LINC00313	8.07511	-2.36562	0.573287	-4.12642	3.68459e-05	0.000178646	LMNTD1	0.754986	-2.46441	0.619456	-3.97834	6.93973e-05	0.0001807								CASP4	1237.28	2.95033	0.402875	7.3232	2.42128e-13
ENSG00000178950	GAK	MCTS1	2083.13	0.470874	0.10503	4.48323	7.35216e-06	5.54344e-05	PAOX	24.031	0.350826	0.0853254	4.11163	3.92879e-05	9.5334e-05								SMYD3	706.867	0.964819	0.239496	4.02854	5.61252e-05	0.000259563	STK32B	31.2042	-1.61468	0.18183	-8.88016	6.67642e-19	6.55793e-18								KANK2	3676.04	1.86324	0.353991	5.26353	1.41318e-07
ENSG00000156958	GALK2	RAP2C-AS1	45.9957	-1.28304	0.188475	-6.8075	9.93123e-12	2.68228e-10	GSTO1	3966.15	0.412668	0.0596932	6.91314	4.74029e-12	1.99727e-11								TMLHE	392.426	-1.17153	0.160736	-7.28852	3.13383e-13	6.22702e-12	CD96	157.02	-1.3773	0.192953	-7.138	9.46962e-13	5.67488e-12								TRIM33	1853.93	-0.717245	0.179475	-3.99634	6.43284e-05
ENSG00000178234	GALNT11	MYO16-AS1	7.17628	4.84481	1.00673	4.81241	1.49124e-06	1.32558e-05	ADAM12	6133.52	1.21357	0.128807	9.4216	4.44279e-21	3.12316e-20								POLR3C	1215.89	0.712738	0.175	4.07278	4.64544e-05	0.000220006	ABI3BP	329.248	-3.17775	0.218643	-14.5339	7.3873e-48	4.68566e-46								FAM114A1	1575.27	1.55528	0.325059	4.78461	1.71316e-06
ENSG00000106105	GARS	LINC00649	536.282	1.30122	0.273948	4.74989	2.03527e-06	1.75738e-05	SLC5A12	21.9178	1.77359	0.301801	5.87669	4.18557e-09	1.43995e-08								THBS2	1908.77	1.90973	0.55481	3.44214	0.000577127	0.00212332	ABCA9	38.1625	-2.8963	0.244298	-11.8556	2.0128e-32	4.87962e-31								DNM3	1278.78	-3.27798	0.49298	-6.64931	2.94477e-11
ENSG00000228376	GAS2L1P2	KCNMB2-AS1	170.916	1.73604	0.36793	4.7184	2.37705e-06	2.02294e-05	GLYAT	160.794	-6.00311	0.259589	-23.1254	2.56915e-118	4.36766e-116								FAM183A	14.1981	4.57512	1.47362	3.10468	0.00190485	0.00611484	DISP1	283.004	-0.465185	0.0942191	-4.93727	7.9223e-07	2.63939e-06								MBP	32395.6	-3.20558	0.823195	-3.89407	9.85772e-05
ENSG00000249948	GBA3	AADACP1	57.7275	2.32258	0.67782	3.42655	0.000611312	0.00264403	FEZ1	354.241	-1.41451	0.101283	-13.9659	2.51569e-44	4.84265e-43								CMC1	619.841	-1.06668	0.174187	-6.12379	9.13739e-10	1.0434e-08	CCSAP	382.398	0.990861	0.0994763	9.96077	2.26309e-23	3.04903e-22								UVRAG	940.06	-1.10959	0.130731	-8.48758	2.10985e-17
ENSG00000225492	GBP1P1	ISY1	1176.77	0.435724	0.128344	3.39498	0.000686331	0.00291835	CDH8	48.5063	-1.37678	0.155791	-8.83736	9.80101e-19	6.08921e-18								DYNC2H1	343.441	1.17439	0.355266	3.30567	0.000947491	0.00330157	PDLIM3	641.13	-2.17125	0.203862	-10.6506	1.73291e-26	2.88691e-25								ITSN2	897.723	-1.32793	0.18478	-7.18657	6.64416e-13
ENSG00000162645	GBP2	DUXAP10	140.719	3.12286	0.407469	7.66404	1.80168e-14	7.7275e-13	PPP1R1C	37.767	1.65467	0.258401	6.4035	1.51858e-10	5.79681e-10								AGMO	1598.69	-4.03608	0.664562	-6.0733	1.25311e-09	1.38783e-08	LY96	81.2696	-0.974658	0.192917	-5.0522	4.36744e-07	1.49721e-06								SH2D1B	10.3131	-2.75563	0.570418	-4.83089	1.35924e-06
ENSG00000089154	GCN1	CASC9	530.066	1.29379	0.420385	3.07763	0.00208655	0.0075293	FRMD4A	1475.39	-1.05398	0.0812002	-12.9801	1.58772e-38	2.42899e-37								RGPD1	4.45667	-2.12599	0.612193	-3.47275	0.000515149	0.001917	CHODL	21.3056	-2.84333	0.272201	-10.4457	1.53297e-25	2.39528e-24								TMEM184B	3864.11	-1.22678	0.239566	-5.12086	3.04148e-07
ENSG00000119125	GDA	GBA3	20.491	4.88744	0.945043	5.17166	2.32027e-07	2.52066e-06	AKR1C2	1678.55	-3.14128	0.244627	-12.8411	9.64811e-38	1.43117e-36								SECISBP2	1802.21	-0.734654	0.167633	-4.38252	1.17314e-05	6.32268e-05	NCAM2	47.7093	-1.25293	0.240196	-5.21629	1.82541e-07	6.52668e-07								TYW1	1062.64	0.755662	0.192212	3.9314	8.44536e-05
ENSG00000104381	GDAP1	LINC00989	8.71755	-1.48753	0.401963	-3.70066	0.000215043	0.00107737	ITIH2	104.851	-2.36276	0.226853	-10.4154	2.10999e-25	1.83863e-24								C17orf99	14.9693	4.3196	1.05506	4.09418	4.23657e-05	0.000202562	GABPA	794.791	-0.525512	0.108078	-4.86234	1.16008e-06	3.78606e-06								NOS1AP	332.366	-3.49076	0.413915	-8.43353	3.35405e-17
ENSG00000196505	GDAP2	CASC19	120.827	1.80006	0.537396	3.34959	0.000809325	0.00337043	INPP1	685.896	-1.10391	0.0765997	-14.4114	4.3887e-47	9.25255e-46								RILPL1	390.212	0.922685	0.236903	3.89478	9.82878e-05	0.000429395	TSEN2	559.473	1.03184	0.104435	9.88026	5.0703e-23	6.67415e-22								SGMS1	767.837	-1.32669	0.228591	-5.80376	6.4843e-09
ENSG00000204120	GIGYF2	MIR2052HG	33.1929	1.73251	0.544559	3.1815	0.00146514	0.00557604	CENPU	1447.39	2.37279	0.100701	23.5628	9.27826e-123	1.75479e-120								FOCAD	1170.89	1.11817	0.327961	3.40947	0.000650889	0.00236481	EPHB1	192.197	1.3191	0.275639	4.78559	1.70485e-06	5.46159e-06								C1orf53	191.974	1.60419	0.41632	3.85326	0.000116558
ENSG00000055211	GINM1	NPIPA2	4.63657	2.34654	0.75705	3.09958	0.00193794	0.00707908	RABGAP1L	3367.37	0.320584	0.0646904	4.95566	7.20852e-07	2.06645e-06								CERKL	25.2617	3.24328	0.720916	4.49883	6.8327e-06	3.85899e-05	CDK19	949.56	-0.460299	0.07673	-5.99895	1.98601e-09	8.73639e-09								GIGYF2	2281.68	-0.626055	0.195175	-3.20766	0.0013382
ENSG00000101003	GINS1	WTAPP1	21.5887	-1.58748	0.443889	-3.57629	0.000348509	0.00162779	TMEM163	175.813	-0.433948	0.139662	-3.10713	0.00188913	0.00377401								RBM34	52.3321	0.884262	0.297028	2.97703	0.00291052	0.00881478	TTC39B	1202.92	-0.426285	0.0977559	-4.36071	1.29644e-05	3.7196e-05								TCTN1	2505.44	1.59689	0.244728	6.52516	6.79289e-11
ENSG00000139436	GIT2	APOPT1	799.518	0.622637	0.169449	3.67447	0.000238342	0.00117474	HAUS1	1342.61	0.872054	0.0740835	11.7712	5.49175e-32	6.50512e-31								IARS	3455.34	0.695703	0.225984	3.07854	0.00208015	0.00659534	SPAG17	7.81796	2.61626	0.348351	7.51042	5.8938e-14	3.93278e-13								LCMT1	1499.02	-0.792286	0.168442	-4.7036	2.55608e-06
ENSG00000149328	GLB1L2	LINC00639	13.1886	-1.25406	0.33004	-3.79971	0.000144865	0.000763947	POC5	742.73	0.30569	0.0525713	5.81478	6.07139e-09	2.06432e-08								ADH7	5.24148	-4.49587	0.90536	-4.96583	6.84073e-07	4.67536e-06	FMN2	30.1789	-3.3323	0.380651	-8.75419	2.05569e-18	1.95882e-17								DOK6	332.893	-4.18813	0.659297	-6.35242	2.11958e-10
ENSG00000186417	GLDN	ADAM20P1	21.6052	0.995964	0.315797	3.15381	0.00161155	0.00604785	XRCC4	497.465	0.427765	0.0482793	8.86022	7.98569e-19	4.99007e-18								PIK3R4	1292.89	-1.08933	0.156464	-6.96217	3.35075e-12	5.70139e-11	ELMO1	351.743	-0.92531	0.155093	-5.96617	2.4288e-09	1.05783e-08								SACM1L	2239.95	-0.473984	0.146265	-3.24059	0.00119283
ENSG00000119392	GLE1	LINC01572	68.0633	1.59697	0.257493	6.202	5.5749e-10	1.0743e-08	BOLL	1.96319	1.52565	0.293317	5.20136	1.97832e-07	5.95754e-07								MMP1	153.585	4.04266	0.73703	5.48506	4.1332e-08	3.5598e-07	CFAP70	35.8175	0.66511	0.184992	3.59535	0.000323959	0.000763953								ARHGEF28	256.52	-2.31829	0.416991	-5.55957	2.70441e-08
ENSG00000174842	GLMN	SEPT4-AS1	12.2434	1.86284	0.327899	5.68112	1.33813e-08	1.89669e-07	DCLRE1C	1246.81	0.248834	0.060386	4.12072	3.77683e-05	9.18479e-05								ANKRD36B	44.3295	1.66728	0.37891	4.40019	1.08154e-05	5.86396e-05	FAM122B	1529.26	0.785884	0.0994514	7.90219	2.74051e-15	2.04631e-14								NPIPA3	1.50418	-2.17169	0.707715	-3.06859	0.00215073
ENSG00000149124	GLYAT	ZNF224	509.908	0.811629	0.187491	4.32889	1.49862e-05	0.000104513	TRIM36	650	0.903711	0.178272	5.06927	3.99346e-07	1.17151e-06								SLC39A10	1027.95	2.22894	0.248307	8.97653	2.79435e-19	1.25367e-17	NSMCE2	726.887	0.598871	0.112172	5.33885	9.35373e-08	3.45022e-07								GBP1P1	317.857	3.58743	0.680167	5.27433	1.33241e-07
ENSG00000146535	GNA12	PTGER4P2-CDK2AP2P2	4.33739	1.23259	0.389531	3.1643	0.00155455	0.00586349	UTRN	7446.31	-1.52235	0.0856613	-17.7717	1.17142e-70	5.37089e-69								SVIL	2537.41	0.976801	0.293416	3.32907	0.000871372	0.00306602	VPS8	1028.31	-0.236176	0.0699359	-3.37704	0.000732707	0.00163137								SLC8A1-AS1	12.9143	1.52469	0.494264	3.08477	0.00203709
ENSG00000127928	GNGT1	NEFL	126.253	2.8329	0.849102	3.33635	0.000848862	0.00350855	LMNTD1	3.16211	1.6219	0.350266	4.63049	3.64797e-06	9.80896e-06								FAM114A1	2889.52	-0.961602	0.229297	-4.19369	2.74453e-05	0.000136488	LCA5L	38.8951	0.68011	0.117318	5.79715	6.74517e-09	2.806e-08								MIR4500HG	50.0272	-3.24532	0.629871	-5.15236	2.57235e-07
ENSG00000135052	GOLM1	SRD5A2	70.862	-2.33775	0.658145	-3.55203	0.000382275	0.00176019	CDYL	2101.58	0.278108	0.0547269	5.08175	3.7398e-07	1.10051e-06								C2orf27A	32.2004	2.5129	0.47719	5.26604	1.394e-07	1.08755e-06	UBN2	931.602	0.291815	0.0946357	3.08356	0.00204542	0.00422867								HLA-DRB6	764.135	2.91687	0.635637	4.58888	4.45621e-06
ENSG00000120370	GORAB	TMEM191B	28.856	2.85163	0.495675	5.75302	8.76627e-09	1.29975e-07	FBXL2	766.598	0.37835	0.0707863	5.34496	9.04385e-08	2.80173e-07								DNM3	103.2	1.24127	0.330856	3.75168	0.000175651	0.000728756	MEGF11	28.8757	1.58848	0.277192	5.7306	1.00076e-08	4.08405e-08								ANKRD36BP2	23.7743	-3.25821	0.919941	-3.54176	0.000397467
ENSG00000179399	GPC5								ABI3BP	1930.65	-2.2108	0.151941	-14.5504	5.80694e-48	1.26116e-46								NUP62CL	80.9742	1.3058	0.400898	3.25719	0.00112522	0.00384559	PTPDC1	295.966	0.572285	0.0796601	7.18409	6.76551e-13	4.10733e-12								LINC01284	5.59114	-2.12741	0.570461	-3.72929	0.000192023
ENSG00000232885	GPC5-AS2								ABCA9	496.91	-3.68033	0.151082	-24.3598	4.56272e-131	1.00051e-128								ZNF587	653.293	1.09586	0.236196	4.63962	3.49043e-06	2.09132e-05	NCK1	793.797	-0.67263	0.0790872	-8.50491	1.81739e-17	1.61638e-16								SLC6A1-AS1	6.49095	-2.43148	0.65177	-3.73058	0.000191039
ENSG00000150625	GPM6A								CCSAP	1302.93	0.516061	0.0771916	6.68545	2.30212e-11	9.2572e-11								DDX39B	3088.99	0.811512	0.258858	3.13497	0.0017187	0.00558642	DYNC1I1	55.5802	-2.056	0.274841	-7.48068	7.39401e-14	4.88843e-13								LYRM9	529.128	-1.25469	0.338675	-3.70469	0.000211645
ENSG00000270898	GPR75-ASB3								PDLIM3	2092.5	-2.57381	0.125869	-20.4482	6.22726e-93	5.48857e-91								TMEM184B	2973.71	1.57457	0.192112	8.19615	2.48218e-16	7.74965e-15	ALG8	1215.21	0.596482	0.0787532	7.57407	3.6172e-14	2.46571e-13								LINC01378	3.76746	-4.95498	1.27895	-3.87425	0.000106952
ENSG00000117262	GPR89A								NCAM2	1171.78	1.52399	0.188718	8.07551	6.71928e-16	3.57179e-15								LRIG2	660.661	0.577287	0.181659	3.17787	0.00148362	0.00492025	STARD9	230.58	-1.31292	0.164717	-7.97075	1.57716e-15	1.20061e-14								PI4KA	4832.04	-2.93038	0.282775	-10.363	3.65497e-25
ENSG00000188092	GPR89B								GABPA	2053.89	-0.43818	0.0490409	-8.935	4.07193e-19	2.57925e-18								C1orf53	173.861	-1.47404	0.271367	-5.43191	5.57542e-08	4.69561e-07	RGL4	18.5711	-1.03921	0.163592	-6.35247	2.11885e-10	1.02133e-09								NPIPB5	359.649	1.94213	0.384577	5.05004	4.41713e-07
ENSG00000196277	GRM7								TSEN2	622.837	0.198392	0.0504505	3.9324	8.41031e-05	0.000197217								FANK1	116.707	3.51244	0.451599	7.77778	7.38081e-15	1.85596e-13	CHCHD6	542.376	1.21297	0.100712	12.0439	2.08761e-33	5.47043e-32								CASC9	4.46346	4.62261	1.26613	3.65097	0.000261247
ENSG00000147697	GSDMC								EPHB1	338.733	-2.16954	0.167803	-12.9291	3.08558e-38	4.67014e-37								TCTN1	1314.8	0.865371	0.253719	3.41075	0.000647852	0.00235608	AGPAT3	3834.76	-0.460303	0.064993	-7.08235	1.41732e-12	8.34056e-12								TPTE2P1	60.7354	-2.5388	0.582276	-4.36014	1.29979e-05
ENSG00000104518	GSDMD								VOPP1	3282.84	0.94797	0.0731402	12.961	2.03592e-38	3.10109e-37								KRT17P5	1.78703	-2.93791	0.863076	-3.404	0.000664072	0.00240695	FAM207A	534.39	0.587338	0.101635	5.77892	7.51829e-09	3.11288e-08								NPIPA2	6.7207	2.53738	0.832758	3.04696	0.00231167
ENSG00000131149	GSE1								CDK19	2523.18	0.292401	0.0856069	3.41562	0.000636367	0.00134991								LCMT1	1142.34	1.39681	0.15196	9.19195	3.85769e-20	1.9533e-18	PRMT2	2254.93	-0.341894	0.0863965	-3.95726	7.58142e-05	0.000196284								OR13A1	5.00566	-1.66593	0.521457	-3.19476	0.00139948
ENSG00000082701	GSK3B								TTC39B	1413.97	0.516842	0.098417	5.25156	1.5082e-07	4.58654e-07								SACM1L	1218.14	-1.13779	0.192243	-5.9185	3.24884e-09	3.37583e-08	PSMC2	3372.33	0.585905	0.0653659	8.96347	3.14632e-19	3.16603e-18								LINC00639	204.789	-1.49549	0.480209	-3.11425	0.00184411
ENSG00000148834	GSTO1								MOV10	3610.03	0.711357	0.058522	12.1554	5.37108e-34	6.9261e-33								LPAL2	219.931	-3.89403	0.480155	-8.10993	5.06501e-16	1.51223e-14	TPCN2	271.245	-0.198206	0.0698823	-2.83628	0.00456426	0.00887212								DLGAP1-AS4	48.2519	-4.05942	0.754402	-5.38099	7.40793e-08
ENSG00000075218	GTSE1								FMN2	39.5985	-0.83746	0.19154	-4.37225	1.22973e-05	3.14561e-05								CSNK1E	2707.43	1.56148	0.199702	7.81909	5.32071e-15	1.36355e-13	C1orf123	870.074	-0.31627	0.0620999	-5.09292	3.52592e-07	1.22112e-06								SEC22B	2494.77	0.533882	0.140411	3.80228	0.00014337
ENSG00000228315	GUSBP11								ELMO1	1237.54	-0.613591	0.0885769	-6.92721	4.29206e-12	1.81229e-11								AS3MT	1.012	-3.27935	0.637073	-5.14752	2.63951e-07	1.95403e-06	JAK1	5270.1	-0.463407	0.0753655	-6.14878	7.80788e-10	3.56483e-09								NBPF15	639.247	1.31888	0.279054	4.72627	2.28681e-06
ENSG00000152240	HAUS1								CFAP70	243.096	-0.471408	0.124914	-3.77385	0.000160748	0.000365063								HSBP1L1	800.433	-1.07458	0.270708	-3.9695	7.20223e-05	0.00032513	GBP2	2560.83	-0.887038	0.15399	-5.76035	8.39398e-09	3.45337e-08								NEFL	2733.76	-4.57336	0.95965	-4.76565	1.88244e-06
ENSG00000147874	HAUS6								FAM122C	163.955	-0.198902	0.065362	-3.04309	0.00234161	0.00461521								WASH7P	50.7871	1.25589	0.329744	3.80868	0.000139712	0.000591903	LMX1A	6.52349	-2.26563	0.479549	-4.72451	2.30672e-06	7.2751e-06								ACACA	3274.93	-1.07911	0.243924	-4.42398	9.69e-06
ENSG00000108840	HDAC5								FAM122B	2389.93	0.552815	0.0601845	9.18534	4.10216e-20	2.74188e-19								LYPLAL1-AS1	26.0312	1.57292	0.465156	3.38148	0.000720955	0.00259431	TDRD5	77.8249	1.12677	0.254053	4.43518	9.19974e-06	2.69028e-05
ENSG00000002746	HECW1								NSMCE2	1545.36	0.716707	0.069163	10.3626	3.66933e-25	3.16704e-24								GUSBP11	145.009	1.54358	0.303591	5.08439	3.68807e-07	2.65021e-06	SPATA17	34.7926	1.31975	0.168481	7.83324	4.7546e-15	3.49224e-14
ENSG00000122557	HERPUD2								LCA5L	252.969	0.931248	0.0857187	10.864	1.71083e-27	1.63901e-26								FEZF1-AS1	16.5642	4.13412	0.878857	4.70397	2.55145e-06	1.56085e-05	ERCC3	1502.14	0.455443	0.0437075	10.4202	2.00431e-25	3.1133e-24
ENSG00000100644	HIF1A								MX1	9876.25	1.86433	0.158933	11.7303	8.91245e-32	1.04561e-30								SERPINB9P1	206.607	1.99902	0.507313	3.9404	8.13443e-05	0.000361844	CDC42EP3	804.539	-1.02138	0.120677	-8.46376	2.58885e-17	2.27487e-16
ENSG00000100084	HIRA								NCK1	1654.77	-0.343332	0.0581421	-5.90505	3.52541e-09	1.22042e-08								SLC6A1-AS1	5.70334	-2.60721	0.721913	-3.61154	0.000304389	0.00119559	ARHGAP25	229.249	-1.12009	0.150634	-7.43589	1.03867e-13	6.78639e-13
ENSG00000196126	HLA-DRB1								DYNC1I1	157.049	-0.754311	0.150623	-5.00794	5.50164e-07	1.59433e-06								AADACP1	183.136	-2.361	0.791716	-2.98212	0.00286257	0.00868685	STK36	712.47	0.821152	0.0970702	8.45936	2.68851e-17	2.3593e-16
ENSG00000229391	HLA-DRB6								ALG8	4001.25	0.940114	0.107317	8.76015	1.94991e-18	1.19203e-17								ISY1	600.585	0.745985	0.252121	2.95883	0.00308807	0.00928446	CD200R1	34.5321	-1.61388	0.189825	-8.50193	1.8647e-17	1.65734e-16
ENSG00000176256	HMGB4								CES5A	3.09196	1.32832	0.364359	3.64565	0.000266719	0.000591001								SYNPR-AS1	7.61268	4.32878	1.22061	3.5464	0.000390529	0.00149412	WDFY3	1009.17	-0.272278	0.0920708	-2.95727	0.00310381	0.00622432
ENSG00000100281	HMGXB4								STARD9	631.725	-2.2631	0.0897957	-25.2028	3.731e-140	1.01409e-137								DUXAP10	34.7987	2.06408	0.627874	3.28742	0.00101111	0.00350064	ALB	20.2249	3.69227	0.569378	6.48474	8.88837e-11	4.44655e-10
ENSG00000215271	HOMEZ								AMFR	10555.1	0.347778	0.0844717	4.1171	3.83673e-05	9.32346e-05								LINC00992	163.962	3.56895	0.542192	6.58245	4.62747e-11	6.57372e-10	C3orf67	121.49	1.8019	0.23876	7.5469	4.45738e-14	3.01503e-13
ENSG00000110756	HPS5								RSPRY1	2532.95	0.238184	0.0511822	4.65365	3.26117e-06	8.80489e-06								GBA3	2517.79	-5.4825	0.83647	-6.55433	5.58913e-11	7.82035e-10	RYK	1901.44	0.202189	0.0659923	3.06382	0.0021853	0.00449714
ENSG00000136720	HS6ST1								CHCHD6	697.768	0.427973	0.0723419	5.91597	3.29922e-09	1.14413e-08								PRKDC	5309	0.7301	0.20122	3.62836	0.000285224	0.00112825	ZDHHC3	5052.11	-0.366164	0.0656338	-5.57889	2.42058e-08	9.48832e-08
ENSG00000226742	HSBP1L1								AGPAT3	6975.6	0.278282	0.050047	5.56041	2.69134e-08	8.71098e-08								TPTE2P1	15.0468	2.08343	0.548667	3.79725	0.000146308	0.000616877	RPN1	13714	0.371484	0.062259	5.96676	2.42012e-09	1.05451e-08
ENSG00000086696	HSD17B2								FAM207A	688.276	0.627165	0.10282	6.09967	1.06288e-09	3.81717e-09								BBOX1-AS1	4.69761	3.62472	1.23045	2.94585	0.00322069	0.00962269	CCDC51	836.954	0.526712	0.0783572	6.72193	1.79331e-11	9.50944e-11
ENSG00000106302	HYAL4								LSS	3650.55	-0.272596	0.0737468	-3.69637	0.000218701	0.000489112								OR13A1	3.01625	3.3246	0.987481	3.36675	0.000760603	0.00271653	SHISA5	7806.07	0.654267	0.0980544	6.67249	2.51502e-11	1.31703e-10
ENSG00000276975	HYDIN2								PRMT2	5417.04	-0.225548	0.0507982	-4.44009	8.99224e-06	2.33038e-05								MRC1	1350.79	-3.69343	0.496501	-7.43891	1.01523e-13	2.14783e-12	TMEM184C	1176.42	-0.363483	0.067349	-5.39701	6.77597e-08	2.53464e-07
ENSG00000196305	IARS								PSMC2	5730.47	0.419402	0.0432825	9.68988	3.32933e-22	2.47903e-21								LINC01572	25.4647	2.53062	0.520808	4.85903	1.17963e-06	7.71112e-06	ADGRV1	47.7601	-1.08959	0.259906	-4.19224	2.76216e-05	7.61314e-05
ENSG00000067704	IARS2								CELF5	85.633	-0.616516	0.196111	-3.1437	0.00166826	0.00335626								SEPT4-AS1	10.6313	-1.53829	0.319458	-4.81532	1.46965e-06	9.41573e-06	CAGE1	3.80682	1.1438	0.216011	5.29507	1.18969e-07	4.33929e-07
ENSG00000010404	IDS								ZNF577	588.839	-0.320419	0.0905457	-3.53875	0.000402023	0.000872954								SEC22B	1924.13	-0.538662	0.17228	-3.12666	0.00176806	0.00572182	PRIMPOL	203.201	-0.306995	0.0985842	-3.11404	0.00184546	0.00384081
ENSG00000163913	IFT122								C1orf123	1771.49	-0.448773	0.0479154	-9.36596	7.5361e-21	5.23845e-20								HYDIN2	57.0426	2.85783	0.535374	5.33801	9.39717e-08	7.58962e-07	CMYA5	28.4527	-0.995692	0.163766	-6.07998	1.20197e-09	5.38881e-09
ENSG00000122970	IFT81								USP24	5330.21	-0.280022	0.0606723	-4.61531	3.92508e-06	1.05192e-05								NEFL	426.606	7.09691	1.06982	6.63373	3.27316e-11	4.73624e-10	KLKB1	13.112	-0.961858	0.216604	-4.44064	8.96931e-06	2.62639e-05
ENSG00000132740	IGHMBP2								JAK1	12759	-0.663583	0.059074	-11.2331	2.80508e-29	2.92232e-28								SRD5A2	2557.69	-7.34121	0.721836	-10.1702	2.69365e-24	2.53954e-22	CDCA7L	950.95	0.52094	0.105942	4.91721	8.77859e-07	2.90702e-06
ENSG00000144847	IGSF11								GBP2	6964.62	-0.650696	0.100582	-6.46929	9.84651e-11	3.80701e-10															TAGAP	160.146	-1.28664	0.184844	-6.96069	3.3862e-12	1.92255e-11
ENSG00000110324	IL10RA								LMX1A	17.9127	-2.51247	0.210655	-11.9269	8.56981e-33	1.04906e-31															RAD21	7729.92	0.345679	0.0899595	3.84261	0.000121733	0.000305752
ENSG00000115594	IL1R1								TDRD5	636.62	0.903026	0.142281	6.34676	2.19898e-10	8.29295e-10															SPIDR	1597.89	0.294386	0.0682687	4.31217	1.61659e-05	4.58652e-05
ENSG00000136689	IL1RN								SPATA17	281.339	1.83156	0.113973	16.0701	4.136e-58	1.24825e-56															SUN1	4116.47	0.179501	0.0640499	2.80252	0.00507045	0.0097748
ENSG00000174564	IL20RB								BROX	5484.87	0.715039	0.0603788	11.8425	2.35204e-32	2.8214e-31															SVEP1	412.172	-1.77473	0.197931	-8.9664	3.06355e-19	3.08824e-18
ENSG00000104432	IL7								CDC42EP3	2161.53	-0.685389	0.106678	-6.42482	1.32022e-10	5.06132e-10															VCP	12866.3	0.263309	0.0666446	3.95093	7.78471e-05	0.000201125
ENSG00000151689	INPP1								ARHGAP25	856.512	-0.460659	0.100181	-4.59826	4.2604e-06	1.13842e-05															DDIAS	323.858	1.92305	0.1225	15.6983	1.55325e-55	1.52303e-53
ENSG00000109452	INPP4B								STK36	1904.58	0.43055	0.0684205	6.2927	3.11984e-10	1.16343e-09															FAAH2	361.894	0.764626	0.106637	7.17036	7.48031e-13	4.52737e-12
ENSG00000143624	INTS3								CD200R1	105.095	-0.967935	0.124781	-7.75706	8.69175e-15	4.32075e-14															VDAC2	3069.2	-0.467669	0.0738507	-6.33262	2.41033e-10	1.1559e-09
ENSG00000065150	IPO5								WDFY3	4137.11	-0.428616	0.0680129	-6.30198	2.93874e-10	1.09761e-09															CASP7	2637.29	-1.76555	0.0960032	-18.3905	1.56517e-75	4.75763e-73
ENSG00000133704	IPO8								ALB	1066.52	-1.06644	0.308646	-3.45521	0.000549861	0.00117564															AMOTL1	572.127	-1.86334	0.198842	-9.37093	7.18975e-21	8.14537e-20
ENSG00000132321	IQCA1								C3orf67	257.897	2.08493	0.121779	17.1206	1.04107e-65	4.05277e-64															BRD7	2080.09	0.301529	0.0767203	3.93024	8.48603e-05	0.000218189
ENSG00000173226	IQCB1								RYK	4086.66	-0.376231	0.0453633	-8.29374	1.09746e-16	6.08982e-16															FAM227B	59.7191	-0.367592	0.111433	-3.29877	0.000971091	0.00211915
ENSG00000168310	IRF2								ZDHHC3	4220.69	-0.365318	0.0447339	-8.16648	3.17509e-16	1.71756e-15															WDR72	573.678	2.98804	0.293719	10.1731	2.6143e-24	3.74707e-23
ENSG00000101230	ISM1								RPN1	22085.8	0.750074	0.0541989	13.8393	1.47656e-43	2.76724e-42															PKD1L2	9.52322	-2.41805	0.262787	-9.20157	3.52746e-20	3.80642e-19
ENSG00000240682	ISY1								IFT122	3465.23	0.491566	0.0716671	6.85902	6.93344e-12	2.89154e-11															PRKCB	257.006	-2.42231	0.202944	-11.9359	7.69642e-33	1.92977e-31
ENSG00000261796	ISY1-RAB43								CCDC51	967.576	0.61435	0.058304	10.537	5.83152e-26	5.21676e-25															PLEKHA7	1539.11	-1.04863	0.0854995	-12.2648	1.39935e-34	3.91898e-33
ENSG00000142856	ITGB3BP								SHISA5	11290.5	0.643214	0.057418	11.2023	3.97256e-29	4.10748e-28															NNMT	1314.37	0.830599	0.194868	4.26236	2.02277e-05	5.67014e-05
ENSG00000151655	ITIH2								PRMT9	702.434	-0.390798	0.0476659	-8.19869	2.43027e-16	1.32317e-15															AP1G1	3299.84	-0.408829	0.0640569	-6.38227	1.74476e-10	8.46899e-10
ENSG00000078596	ITM2A								PRIMPOL	481.314	-0.315139	0.0552531	-5.70355	1.17337e-08	3.90101e-08															FBXO22	968.685	0.574683	0.0742609	7.7387	1.00436e-14	7.19118e-14
ENSG00000123104	ITPR2								CMYA5	2094.22	-0.835839	0.136947	-6.10336	1.03864e-09	3.73246e-09															MVD	2231.05	0.51701	0.134819	3.83486	0.000125635	0.000314793
ENSG00000198399	ITSN2								KLKB1	24.2587	-0.633004	0.139665	-4.5323	5.83455e-06	1.54046e-05															TRAPPC9	1950.04	0.262286	0.0849491	3.08757	0.00201803	0.00417684
ENSG00000162434	JAK1								RAD21	23519.9	1.05915	0.0888837	11.9162	9.74915e-33	1.1883e-31															NXN	588.337	-0.901347	0.194986	-4.62262	3.78915e-06	1.16432e-05
ENSG00000197256	KANK2								CSMD3	39.3598	3.70748	0.402446	9.21237	3.19004e-20	2.14517e-19															SRP68	3157.35	0.188663	0.0542356	3.47858	0.000504083	0.00115448
ENSG00000267313	KC6								SPIDR	4040.99	0.213551	0.0587479	3.63504	0.00027794	0.000614605															ULK4	140.589	0.758343	0.108849	6.96691	3.23978e-12	1.84445e-11
ENSG00000169282	KCNAB1								SUN1	7156.05	-0.435131	0.0491188	-8.85875	8.09198e-19	5.05579e-18															IRF2	1409.3	-0.596829	0.0655006	-9.1118	8.10232e-20	8.51973e-19
ENSG00000183960	KCNH8								CCDC171	308.34	-0.351001	0.0697331	-5.03349	4.81627e-07	1.40219e-06															NPIPB3	49.7429	0.674488	0.179185	3.76421	0.000167077	0.000410917
ENSG00000237978	KCNMB2-AS1								SVEP1	2588.81	-3.3628	0.135069	-24.8969	8.03525e-137	1.99305e-134															KCNAB1	52.5785	-1.88896	0.167652	-11.2672	1.90641e-29	3.83963e-28
ENSG00000110906	KCTD10								VCP	23848.5	0.382765	0.0466028	8.21334	2.15111e-16	1.17428e-15															STK32A	22.9818	-1.11439	0.257204	-4.3327	1.47295e-05	4.20101e-05
ENSG00000173120	KDM2A								DDIAS	502.386	1.75108	0.109115	16.048	5.89958e-58	1.77343e-56															PTK2	3883.16	0.358138	0.0726552	4.92928	8.2533e-07	2.7425e-06
ENSG00000115548	KDM3A								FAAH2	925.874	0.974427	0.0955397	10.1992	1.9994e-24	1.65974e-23															ZFPM2	68.1989	-1.37128	0.209865	-6.53409	6.39985e-11	3.23687e-10
ENSG00000166398	KIAA0355								CASP7	2419.9	0.208013	0.067453	3.08382	0.00204359	0.00406364															FAM153A	2.93517	-1.29128	0.331033	-3.90076	9.58896e-05	0.000244447
ENSG00000135709	KIAA0513								AMOTL1	2933.67	-1.47159	0.105376	-13.9651	2.54679e-44	4.89835e-43															SEMA3E	34.3054	-3.5592	0.415252	-8.57117	1.02436e-17	9.28409e-17
ENSG00000100578	KIAA0586								BTRC	2917.66	0.341284	0.0801541	4.25785	2.06402e-05	5.15904e-05															PFKFB3	2060.06	0.600555	0.10573	5.68007	1.34636e-08	5.41514e-08
ENSG00000164659	KIAA1324L								ARIH1	5296.98	-0.179227	0.0493291	-3.6333	0.00027982	0.00061846															SOCS6	1152.33	-1.03102	0.105347	-9.78689	1.28183e-22	1.63712e-21
ENSG00000075945	KIFAP3								KIAA0355	2283.52	-0.765542	0.0566743	-13.5077	1.4076e-41	2.43864e-40															AKAP13	3011.53	-0.822028	0.105836	-7.76701	8.03607e-15	5.79054e-14
ENSG00000189013	KIR2DL4								WDR72	221.918	1.51632	0.296064	5.1216	3.02956e-07	8.97966e-07															FAM86JP	82.7802	0.93482	0.111906	8.35363	6.61969e-17	5.6303e-16
ENSG00000104731	KLHDC4								CDYL2	2334.75	0.882636	0.113509	7.77591	7.49072e-15	3.74544e-14															PRKCE	320.32	-0.825287	0.0917083	-8.99904	2.27695e-19	2.32136e-18
ENSG00000114648	KLHL18								PKD1L2	136.289	-2.88123	0.153348	-18.7888	9.32471e-79	5.46845e-77															CLCN5	816.678	0.962563	0.123609	7.78714	6.85411e-15	4.96694e-14
ENSG00000164344	KLKB1								TMX3	3171.95	-0.26122	0.0522798	-4.99658	5.83569e-07	1.6859e-06															COL24A1	54.8761	0.692875	0.239297	2.89546	0.00378606	0.00746632
ENSG00000255819	KLRC4-KLRK1								CLEC4D	9.91022	0.771766	0.228154	3.38265	0.000717892	0.00151232															THOP1	2683.75	0.88769	0.111826	7.93813	2.05252e-15	1.54933e-14
ENSG00000213809	KLRK1								PLEKHA7	1888.75	-0.195675	0.0682579	-2.8667	0.00414776	0.00788206															NEGR1	183.318	-3.04129	0.1971	-15.4302	1.02566e-53	9.16965e-52
ENSG00000108424	KPNB1								NNMT	5770.81	-0.549182	0.112138	-4.89738	9.71236e-07	2.75138e-06															FGGY	1222.25	1.76241	0.242539	7.26651	3.68891e-13	2.29092e-12
ENSG00000205266	KRT17P5								YWHAB	25968	0.430235	0.0467591	9.20109	3.54329e-20	2.37638e-19															MUCL1	9.83949	3.32793	0.493965	6.73718	1.61487e-11	8.59899e-11
ENSG00000126777	KTN1								FBXO22	1928.06	0.482566	0.0461351	10.4599	1.32049e-25	1.16092e-24															CBWD1	338.715	0.430613	0.0970067	4.439	9.03758e-06	2.6454e-05
ENSG00000115919	KYNU								MVD	1598.25	0.512484	0.109057	4.69924	2.61125e-06	7.11321e-06															DMXL1	786.29	-0.868077	0.101654	-8.53951	1.34791e-17	1.20862e-16
ENSG00000147036	LANCL3								TRAPPC9	3696.02	0.771536	0.0692374	11.1433	7.71742e-29	7.86841e-28															IQCB1	896.788	0.627347	0.0845621	7.41877	1.18212e-13	7.68808e-13
ENSG00000011376	LARS2								DAPK3	3154.22	0.702849	0.0752569	9.33933	9.69493e-21	6.69908e-20															SLC19A1	1333.72	0.791321	0.112108	7.05854	1.68266e-12	9.82593e-12
ENSG00000157578	LCA5L								SRP68	6470.85	0.201809	0.0518171	3.89464	9.83449e-05	0.000228722															TOMM20	8751.16	0.595167	0.0783067	7.60045	2.95102e-14	2.02875e-13
ENSG00000205629	LCMT1								FSTL5	4.52051	1.26953	0.384235	3.30406	0.000952967	0.00197878															XXYLT1	569.048	0.431914	0.0714803	6.04242	1.51816e-09	6.74672e-09
ENSG00000187012	LINC00207								KCNAB1	301.353	-1.84615	0.104839	-17.6093	2.08896e-69	9.22374e-68															ANKRD36C	70.8214	1.20729	0.225952	5.34312	9.13617e-08	3.37406e-07
ENSG00000185186	LINC00313								STK32A	85.2031	-1.47401	0.156658	-9.40907	5.00539e-21	3.50671e-20															IL20RB	40.2637	0.592035	0.201003	2.9454	0.00322536	0.00644192
ENSG00000236176	LINC00353								PTK2	8879.68	0.530411	0.0642463	8.2559	1.50759e-16	8.30778e-16															GLMN	272.02	0.768983	0.103376	7.43872	1.01665e-13	6.64472e-13
ENSG00000225249	LINC00378								ZFPM2	443.272	-1.28141	0.116414	-11.0073	3.52449e-28	3.47481e-27															SUGCT	108.462	-2.2151	0.169305	-13.0835	4.09095e-39	1.508e-37
ENSG00000228669	LINC00448								FAM153A	9.3001	-0.834552	0.226703	-3.68125	0.000232091	0.000517632															DLEU1	270.282	1.40479	0.125819	11.1652	6.03768e-29	1.17472e-27
ENSG00000229373	LINC00452								SEMA3E	867.466	-0.536854	0.184406	-2.91126	0.0035998	0.0069064															LRRTM4	4.56094	-1.39621	0.36402	-3.83552	0.000125299	0.00031399
ENSG00000245526	LINC00461								PFKFB3	9201.86	-2.06981	0.110368	-18.7538	1.80187e-78	1.04723e-76															FKBP9P1	95.5112	1.47315	0.201475	7.3118	2.63585e-13	1.65778e-12
ENSG00000250682	LINC00491								AKAP13	6829.06	-0.553575	0.0641369	-8.63115	6.07395e-18	3.60914e-17															NR2C2	1196.93	-0.366184	0.07531	-4.86236	1.15996e-06	3.78598e-06
ENSG00000146666	LINC00525								FAM86JP	167.106	0.551854	0.073658	7.49211	6.77751e-14	3.20123e-13															CD163	926.806	-1.21655	0.249052	-4.88472	1.03578e-06	3.40202e-06
ENSG00000259070	LINC00639								PRKCE	808.533	-0.331717	0.084467	-3.92718	8.59469e-05	0.00020127															ACAD9	1367.66	0.355832	0.0633504	5.61688	1.94437e-08	7.68414e-08
ENSG00000259129	LINC00648								MUC7	47.9308	-1.58648	0.430472	-3.68545	0.000228301	0.000509479															PDE4DIP	1090.7	-0.632038	0.0843357	-7.49431	6.66487e-14	4.43009e-13
ENSG00000237945	LINC00649								CLCN5	647.219	0.306031	0.0877535	3.48739	0.000487766	0.00104845															SH2D4B	2.10707	1.18854	0.294372	4.03755	5.40123e-05	0.000142632
ENSG00000250334	LINC00989								COL24A1	174.778	1.31886	0.10669	12.3617	4.21283e-35	5.66591e-34															GALNT11	1014.47	0.242054	0.0761785	3.17745	0.00148574	0.00314482
ENSG00000248663	LINC00992								THOP1	2307.24	0.853827	0.0791117	10.7927	3.72758e-27	3.51764e-26															FAM220A	544.33	0.543263	0.0722439	7.51985	5.48407e-14	3.6724e-13
ENSG00000280953	LINC01163								NEGR1	979.554	-1.09058	0.15128	-7.20906	5.63394e-13	2.51926e-12															PFAS	1137.45	0.712709	0.0898645	7.93093	2.17512e-15	1.63968e-14
ENSG00000232827	LINC01189								CERS6	4832.34	1.03331	0.113601	9.09598	9.37343e-20	6.14042e-19															GAK	5285.29	-0.599462	0.085823	-6.98486	2.85147e-12	1.62972e-11
ENSG00000241369	LINC01192								FGGY	593.752	-0.225515	0.0687096	-3.28215	0.0010302	0.00212951															GPC5	7.67505	-1.49693	0.367328	-4.0752	4.59748e-05	0.000122604
ENSG00000233776	LINC01251								CBWD1	847.538	0.358415	0.0641835	5.58423	2.34741e-08	7.63588e-08															PCBP1-AS1	405.464	-0.687093	0.0881545	-7.79419	6.48213e-15	4.70687e-14
ENSG00000230317	LINC01284								DMXL1	2882.16	-0.63085	0.0767729	-8.21708	2.0851e-16	1.1392e-15															NRXN1	36.9032	-4.61058	0.390645	-11.8025	3.78904e-32	8.99805e-31
ENSG00000230402	LINC01349								NADSYN1	3472.55	0.508689	0.0748491	6.7962	1.07418e-11	4.41768e-11															MED14	3056.06	0.320653	0.0880291	3.64257	0.000269925	0.000645116
ENSG00000226891	LINC01359								KDM2A	10193.8	0.2325	0.0570449	4.07575	4.58667e-05	0.000110559															TPRXL	41.9986	3.9233	0.384411	10.206	1.86342e-24	2.69824e-23
ENSG00000236922	LINC01378								SLC19A1	1538.17	0.953497	0.0846832	11.2596	2.07771e-29	2.18006e-28															PCGF5	2384.73	-0.534736	0.0790813	-6.76185	1.36239e-11	7.30776e-11
ENSG00000239921	LINC01471								TOMM20	20633.8	0.234444	0.0575209	4.07581	4.58549e-05	0.000110536															MAP3K15	5.04948	-0.822371	0.208942	-3.93589	8.28905e-05	0.000213388
ENSG00000261008	LINC01572								XXYLT1	1245.42	0.577156	0.0615296	9.38013	6.58908e-21	4.59424e-20															OR56B4	1.00444	-0.69208	0.235622	-2.93725	0.00331136	0.006601
ENSG00000204020	LIPN								CNTNAP2	2249.07	3.95597	0.232043	17.0485	3.58892e-65	1.37821e-63															RPH3AL	536.014	-0.304199	0.107357	-2.83354	0.00460356	0.00894323
ENSG00000227110	LMCD1-AS1								DENND4A	1768.32	-0.376958	0.060935	-6.18623	6.16198e-10	2.25363e-09															RFX7	664.181	0.284423	0.0872959	3.25815	0.0011214	0.0024248
ENSG00000152936	LMNTD1								ANKRD36C	230.371	-1.11696	0.112571	-9.92221	3.33284e-23	2.59207e-22															RAD51B	181.58	0.536056	0.0922477	5.81105	6.20838e-09	2.5928e-08
ENSG00000136153	LMO7								GLMN	538.329	0.512356	0.0642524	7.97413	1.53464e-15	7.99664e-15															AP1S2	519.529	-0.60996	0.126272	-4.83053	1.36169e-06	4.40549e-06
ENSG00000162761	LMX1A								PCCA	1159.66	-1.15487	0.0768656	-15.0245	5.07094e-51	1.2185e-49															PLCB1	547.384	0.564264	0.181511	3.10871	0.00187908	0.00390707
ENSG00000213071	LPAL2								SUGCT	329.531	0.777536	0.106115	7.32728	2.34866e-13	1.07252e-12															RGS6	24.4754	-0.82275	0.271478	-3.03063	0.00244045	0.00498304
ENSG00000198799	LRIG2								DLEU1	225.546	0.616916	0.0911571	6.76762	1.30921e-11	5.34796e-11															MCEMP1	42.5046	3.17002	0.330503	9.59151	8.68045e-22	1.04546e-20
ENSG00000137821	LRRC49								LRRTM4	5.70875	-1.92411	0.304186	-6.32543	2.52526e-10	9.47932e-10															AP2A2	2988.33	-0.323818	0.0774595	-4.18048	2.90893e-05	7.98424e-05
ENSG00000214954	LRRC69								SHMT1	1819.12	-1.15823	0.0704494	-16.4406	9.7973e-61	3.22253e-59															CAMK1D	1401.28	-1.09105	0.169364	-6.44207	1.17852e-10	5.8264e-10
ENSG00000131951	LRRC9								CLVS1	13.1904	-1.58117	0.154266	-10.2497	1.18764e-24	9.9701e-24															CTNNA3	17.8502	-3.92225	0.327349	-11.9819	4.42318e-33	1.12838e-31
ENSG00000176204	LRRTM4								NR2C2	2594.25	-0.485577	0.0699765	-6.93914	3.94497e-12	1.67024e-11															NPIPA1	79.726	0.643755	0.154184	4.17524	2.97672e-05	8.15558e-05
ENSG00000130332	LSM7								CD163	2856.71	-0.498693	0.137654	-3.62281	0.000291425	0.000643044															EP400	2197.6	0.268168	0.0791054	3.39001	0.0006989	0.00156094
ENSG00000160285	LSS								ULK4P3	0.956519	-1.19477	0.248655	-4.80495	1.5479e-06	4.30599e-06															DGCR6	1.62118	1.43256	0.432359	3.31335	0.000921847	0.00202006
ENSG00000012223	LTF								GALNT11	2571.11	-0.265236	0.0487053	-5.44573	5.15934e-08	1.63106e-07															EFHC2	20.8526	-2.3279	0.256572	-9.07307	1.15709e-19	1.2061e-18
ENSG00000154589	LY96								FAM220A	1411.85	0.411243	0.0431277	9.53549	1.49179e-21	1.07721e-20															NPIPA5	29.4517	0.893037	0.230855	3.86839	0.000109555	0.000277013
ENSG00000228063	LYPLAL1-AS1								GAK	5877.23	0.588982	0.0596646	9.87155	5.53019e-23	4.25965e-22															KCNH8	154.542	2.51158	0.207139	12.1251	7.77832e-34	2.09951e-32
ENSG00000232859	LYRM9								CDH5	3149.86	-1.66696	0.0886076	-18.8129	5.92579e-79	3.48869e-77															ST6GALNAC3	72.191	-1.32969	0.171766	-7.7413	9.84084e-15	7.05114e-14
ENSG00000127603	MACF1								PCBP1-AS1	1156.69	-0.282083	0.0616825	-4.57314	4.80478e-06	1.27802e-05															MAP7D2	336.475	2.11905	0.357927	5.92032	3.21312e-09	1.38011e-08
ENSG00000172264	MACROD2								NRXN1	140.842	-1.40927	0.248077	-5.68078	1.34082e-08	4.43887e-08															NELL2	114.693	-1.27591	0.26617	-4.79359	1.63822e-06	5.25495e-06
ENSG00000002822	MAD1L1								MED14	4137.6	0.437537	0.0571115	7.66109	1.84361e-14	8.97505e-14															ANKS1B	11.3427	-3.21003	0.256993	-12.4907	8.39025e-36	2.51791e-34
ENSG00000147676	MAL2								TPRXL	73.8385	1.76877	0.228077	7.75515	8.82379e-15	4.38494e-14															FAF1	1857.58	0.2199	0.0591623	3.7169	0.000201684	0.000490175
ENSG00000013619	MAMLD1								PCGF5	3101.53	-0.651058	0.062608	-10.399	2.50632e-25	2.17814e-24															SMYD3	666.532	1.01763	0.086437	11.773	5.37486e-32	1.26575e-30
ENSG00000101363	MANBAL								MAP3K15	10.9296	-0.878304	0.132478	-6.6298	3.36142e-11	1.33981e-10															PBX1	1463.24	-1.46929	0.15382	-9.55198	1.27245e-21	1.51423e-20
ENSG00000180815	MAP3K15								CXCR2	36.0651	-2.02758	0.140232	-14.4588	2.20624e-47	4.68179e-46															NPIPB4	117.337	1.06357	0.172154	6.17804	6.49028e-10	2.98394e-09
ENSG00000184368	MAP7D2								RPH3AL	644.838	-0.356095	0.113284	-3.1434	0.00167	0.00335946															DLEU7	10.3832	0.668565	0.218142	3.06482	0.00217798	0.00448302
ENSG00000071655	MBD3								RAD51B	516.871	-0.319101	0.105456	-3.0259	0.00247894	0.00487001															POLR3C	1111.45	0.549927	0.0605686	9.0794	1.09173e-19	1.14038e-18
ENSG00000197971	MBP								PLCB1	1252.02	-0.761773	0.14084	-5.40878	6.34546e-08	1.99368e-07															THBS2	2409.2	2.32959	0.278405	8.36765	5.87801e-17	5.02544e-16
ENSG00000140943	MBTPS1								RGS6	97.5386	-2.41498	0.181365	-13.3156	1.87929e-40	3.12122e-39															NKRF	572.543	1.40324	0.0815584	17.2053	2.42378e-66	4.23797e-64
ENSG00000183019	MCEMP1								MCEMP1	16.2218	1.47822	0.201932	7.3204	2.47229e-13	1.12772e-12															GLDN	77.2424	-2.64512	0.202405	-13.0684	4.98895e-39	1.82709e-37
ENSG00000073111	MCM2								CTNNA3	35.2007	-1.41445	0.165954	-8.52315	1.55272e-17	9.01967e-17															RPS23	6872.56	0.466485	0.130746	3.56786	0.000359908	0.000842294
ENSG00000111877	MCM9								PLGLB1	9.25271	-0.56467	0.113924	-4.95656	7.17522e-07	2.05742e-06															FAM183A	11.068	1.33323	0.32398	4.11516	3.86917e-05	0.000104293
ENSG00000232119	MCTS1								EP400	3991.49	-0.145798	0.0463593	-3.14495	0.00166113	0.0033431															AKR1C1	139.332	-0.995183	0.215555	-4.61684	3.8963e-06	1.19493e-05
ENSG00000065833	ME1								CCR3	15.6269	1.1161	0.161707	6.90201	5.12703e-12	2.15702e-11															DYNC2H1	100.712	-0.826707	0.19826	-4.16982	3.0484e-05	8.34041e-05
ENSG00000180182	MED14								EFHC2	132.326	0.894132	0.14521	6.15752	7.38951e-10	2.6842e-09															AGMO	78.6452	-1.10492	0.297015	-3.72006	0.000199172	0.000484577
ENSG00000157890	MEGF11								KCNH8	60.6789	-1.98062	0.216709	-9.13955	6.27128e-20	4.15077e-19															C2orf88	582.245	-3.74311	0.188344	-19.8738	6.85671e-88	3.22559e-85
ENSG00000239642	MEIKIN								ST6GALNAC3	183.375	-1.9273	0.0993088	-19.4072	6.70989e-84	4.55259e-82															C17orf99	9.17844	1.91588	0.314293	6.09584	1.08863e-09	4.90517e-09
ENSG00000105976	MET								PPP1R2	4081.06	0.313588	0.0545695	5.74659	9.10633e-09	3.05232e-08															RILPL1	187.573	0.559299	0.121664	4.59706	4.28498e-06	1.30572e-05
ENSG00000010165	METTL13								MAP7D2	122.345	0.981564	0.220893	4.44361	8.84623e-06	2.29438e-05															GPR89B	85.8701	0.563905	0.0911929	6.18365	6.26349e-10	2.88673e-09
ENSG00000140545	MFGE8								C6orf58	7.6651	-2.12088	0.154432	-13.7334	6.40538e-43	1.17379e-41															COL4A5	159.216	-1.14495	0.236559	-4.84002	1.29829e-06	4.2114e-06
ENSG00000092931	MFSD11								NELL2	2621.44	3.12399	0.215247	14.5135	9.94904e-48	2.14129e-46															ZNF383	245.642	-0.275384	0.097746	-2.81734	0.00484229	0.00936946
ENSG00000254349	MIR2052HG								SLC22A10	9.31437	1.41779	0.263227	5.38619	7.19684e-08	2.25058e-07															FOCAD	1928.05	0.422849	0.0867443	4.87466	1.08998e-06	3.567e-06
ENSG00000228824	MIR4500HG								BRF1	2253.12	0.447753	0.0600032	7.46217	8.51122e-14	3.98857e-13															CERKL	16.0447	1.66135	0.351257	4.72973	2.24818e-06	7.10201e-06
ENSG00000011143	MKS1								ANKS1B	503.381	0.548555	0.114418	4.79431	1.63237e-06	4.52903e-06															RBM34	24.3585	0.282803	0.0859819	3.2891	0.00100508	0.00218909
ENSG00000196611	MMP1								RGPD2	25.2699	0.697183	0.203256	3.43008	0.000603402	0.00128358															ADAT2	536.818	1.42292	0.104138	13.6637	1.67181e-42	7.58529e-41
ENSG00000155363	MOV10								SMYD3	2082.98	1.54884	0.0953853	16.2378	2.72634e-59	8.53459e-58															KIR2DL4	16.5314	-2.07827	0.294256	-7.06279	1.63194e-12	9.54667e-12
ENSG00000082126	MPP4								PBX1	20370.2	0.817339	0.0985236	8.29587	1.0779e-16	5.98419e-16															ALG1L	62.6785	1.44771	0.177757	8.14433	3.81395e-16	3.049e-15
ENSG00000260314	MRC1								TMLHE	571.181	-0.524572	0.0588746	-8.91	5.10344e-19	3.21725e-18															GRM7	4.90203	-0.72655	0.212248	-3.42311	0.000619088	0.00139642
ENSG00000131368	MRPS25								RASA3	2040.72	-1.21777	0.0844835	-14.4142	4.21006e-47	8.88832e-46															IARS	6138.72	1.09486	0.0759743	14.4109	4.41741e-47	2.68551e-45
ENSG00000113048	MRPS27								DLEU7	36.1735	0.911764	0.104002	8.76678	1.83849e-18	1.12589e-17															STK31	114.342	3.74684	0.247066	15.1653	5.99912e-52	4.79881e-50
ENSG00000005302	MSL3								POLR3C	2599.21	0.412286	0.051877	7.94737	1.90512e-15	9.86598e-15															PTPN1	2451.82	0.204508	0.064982	3.14715	0.00164871	0.0034614
ENSG00000148824	MTG1								THBS2	9462.71	1.17014	0.147373	7.93999	2.02198e-15	1.04521e-14															MMP1	3340.1	4.49607	0.292327	15.3803	2.2194e-53	1.95327e-51
ENSG00000063601	MTMR1								NKRF	747.134	0.40602	0.053268	7.62221	2.49363e-14	1.20644e-13															MVB12B	804.319	-0.457028	0.0990373	-4.61471	3.93647e-06	1.20594e-05
ENSG00000145113	MUC4								GLDN	274.594	-2.21957	0.170517	-13.0168	9.8247e-39	1.51891e-37															ANKRD36B	47.7111	0.945099	0.178208	5.30333	1.13708e-07	4.15852e-07
ENSG00000171195	MUC7								RPS23	7832.43	-0.566149	0.0703285	-8.05007	8.27485e-16	4.37767e-15															SLC39A10	1297.05	1.87668	0.103091	18.204	4.79591e-74	1.36342e-71
ENSG00000172551	MUCL1								FAM183A	79.7346	1.56218	0.16951	9.21583	3.08871e-20	2.07827e-19															CASP4	1395.89	0.557116	0.112929	4.93333	8.08387e-07	2.6898e-06
ENSG00000196814	MVB12B								CMC1	821.876	0.487974	0.0506924	9.62617	6.19986e-22	4.55959e-21															KANK2	2228.02	-1.85913	0.135323	-13.7385	5.97307e-43	2.78012e-41
ENSG00000167508	MVD								AKR1C1	1088.52	-3.558	0.20545	-17.3181	3.43621e-67	1.42052e-65															SVIL	2627.05	-1.99242	0.132461	-15.0415	3.92353e-51	2.98158e-49
ENSG00000157601	MX1								DYNC2H1	1485.1	-0.845968	0.109408	-7.73224	1.05671e-14	5.22496e-14															DCHS2	34.3389	-1.37452	0.376879	-3.64711	0.000265207	0.000634569
ENSG00000120279	MYCT1								AGMO	37.1366	-2.38292	0.167278	-14.2452	4.79845e-46	9.78027e-45															FAM114A1	1632.82	-0.791722	0.112717	-7.02395	2.15677e-12	1.24911e-11
ENSG00000236242	MYO16-AS1								C2orf88	274.282	-2.32729	0.153647	-15.147	7.92814e-52	1.96326e-50															C2orf27A	13.9994	1.2278	0.189704	6.47216	9.66091e-11	4.81352e-10
ENSG00000036448	MYOM2								RILPL1	529.818	-0.248126	0.0618885	-4.00923	6.09164e-05	0.000144927															PLCG2	411.277	-1.89019	0.168556	-11.214	3.48047e-29	6.88359e-28
ENSG00000172890	NADSYN1								GPR89B	255.923	0.708044	0.0663261	10.6752	1.3297e-26	1.22551e-25															MBP	1577.23	-0.595472	0.0944214	-6.30654	2.85349e-10	1.35854e-09
ENSG00000137513	NARS2								ZNF383	608.772	-0.43473	0.0505743	-8.59586	8.26425e-18	4.87996e-17															NUP62CL	163.833	1.47647	0.128483	11.4915	1.45503e-30	3.12653e-29
ENSG00000266338	NBPF15								CERKL	43.5448	3.15277	0.204753	15.3979	1.69084e-53	4.41339e-52															UVRAG	705.7	-0.145145	0.0517455	-2.80498	0.00503204	0.00970596
ENSG00000154654	NCAM2								RBM34	55.6762	0.775931	0.0806959	9.6155	6.87756e-22	5.04491e-21															ITSN2	1260.66	-0.445454	0.0767973	-5.80038	6.61639e-09	2.75417e-08
ENSG00000010292	NCAPD2								USP32P1	37.2695	-1.14853	0.23146	-4.96212	6.97275e-07	2.00177e-06															ZNF587	898.755	0.549717	0.0951932	5.77475	7.70676e-09	3.18818e-08
ENSG00000158092	NCK1								ADAT2	346.66	-0.410604	0.0835548	-4.91419	8.91518e-07	2.53314e-06															DDX39B	2005.37	0.653396	0.115816	5.64167	1.68413e-08	6.69921e-08
ENSG00000061676	NCKAP1								KIR2DL4	13.9242	1.95687	0.234887	8.33111	8.00876e-17	4.48023e-16															SH2D1B	15.5828	-1.75682	0.219756	-7.99444	1.30163e-15	9.97776e-15
ENSG00000147684	NDUFB9								DPY19L2P1	43.6092	3.27453	0.263003	12.4506	1.38849e-35	1.90523e-34															UNC13B	2696.85	-0.415524	0.0958057	-4.33716	1.44339e-05	4.11967e-05
ENSG00000145494	NDUFS6								ALG1L	86.4204	2.08752	0.205268	10.1697	2.70718e-24	2.23056e-23															TMEM184B	3098.66	0.523351	0.0867481	6.033	1.60946e-09	7.13637e-09
ENSG00000277586	NEFL								HLA-DRB1	22800.5	0.629034	0.111169	5.65838	1.5281e-08	5.03903e-08															TYW1	769.877	0.380571	0.0689753	5.5175	3.43857e-08	1.32662e-07
ENSG00000172260	NEGR1								GRM7	22.0161	-0.668416	0.23679	-2.82283	0.00476024	0.00895784															NOS1AP	97.7019	-0.46156	0.11853	-3.89405	9.85863e-05	0.000250805
ENSG00000184613	NELL2								IARS	8977.37	0.493577	0.0597975	8.25414	1.52997e-16	8.42905e-16															C1orf53	107.306	0.497492	0.153161	3.24817	0.0011615	0.00250369
ENSG00000067141	NEO1								STK31	47.2984	1.32871	0.19303	6.88342	5.84312e-12	2.44853e-11															SPRR2E	4.83396	4.9847	0.844295	5.90398	3.54831e-09	1.51732e-08
ENSG00000196712	NF1								PTPN1	6246.85	0.932687	0.0925119	10.0818	6.64978e-24	5.36796e-23															TBC1D8	713.169	0.583029	0.113236	5.14879	2.62171e-07	9.21621e-07
ENSG00000072736	NFATC3								GDAP2	1297.23	0.284601	0.0632948	4.49644	6.91007e-06	1.81241e-05															TCTN1	520.916	0.671644	0.0934247	7.18915	6.51967e-13	3.96295e-12
ENSG00000086102	NFX1								MMP1	1511.12	6.32599	0.250412	25.2624	8.28418e-141	2.30692e-138															ATP6AP1L	89.3592	0.501645	0.134746	3.7229	0.000196949	0.000479315
ENSG00000230020	NHS-AS1								MVB12B	1088.79	-0.304431	0.0629286	-4.83773	1.31333e-06	3.67507e-06															LCMT1	1307.49	-0.231037	0.0823934	-2.80407	0.00504621	0.00973234
ENSG00000010322	NISCH								ANKRD36B	120.152	-0.31029	0.101272	-3.06391	0.00218465	0.00432595															C1QTNF9B	0.817101	1.2821	0.373898	3.42901	0.000605792	0.00136885
ENSG00000186416	NKRF								SLC39A10	2515.01	0.322873	0.0657991	4.90695	9.25027e-07	2.6249e-06															DOK6	30.7396	-0.736716	0.185409	-3.97346	7.08372e-05	0.000184158
ENSG00000112981	NME5								CASP4	2247.15	-0.384699	0.0752678	-5.11107	3.20337e-07	9.47442e-07															DUXAP8	49.6825	3.6741	0.308469	11.9108	1.0403e-32	2.57896e-31
ENSG00000132911	NMUR2								KANK2	4744.39	-1.21638	0.0703832	-17.2822	6.40311e-67	2.60901e-65															CD200R1L	1.78556	3.07507	0.563836	5.45384	4.92949e-08	1.87176e-07
ENSG00000166741	NNMT								SVIL	5038.59	-0.810816	0.0792773	-10.2276	1.4919e-24	1.24529e-23															SACM1L	1564.09	-0.447508	0.0703971	-6.35692	2.05842e-10	9.92928e-10
ENSG00000198929	NOS1AP								DCHS2	144.971	-0.675612	0.216578	-3.11948	0.0018117	0.00362779															EWSAT1	4.11119	1.37658	0.280513	4.90736	9.23091e-07	3.04838e-06
ENSG00000113971	NPHP3								FAM114A1	5126.06	0.304873	0.0606219	5.02909	4.92804e-07	1.43399e-06															LPAL2	33.7172	1.36627	0.164058	8.32802	8.22081e-17	6.94577e-16
ENSG00000274810	NPHP3-ACAD11								PLCG2	1504.32	-0.750481	0.111439	-6.73448	1.6452e-11	6.68132e-11															CSNK1E	2226.86	1.0323	0.0768295	13.4363	3.70715e-41	1.55677e-39
ENSG00000131697	NPHP4								DNM3	324.976	-0.391552	0.106887	-3.66324	0.000249043	0.000553509															C17orf67	67.0171	0.391326	0.120314	3.25254	0.00114377	0.00246885
ENSG00000183426	NPIPA1								MBP	1969.42	-0.716232	0.0989765	-7.23638	4.6081e-13	2.06931e-12															ARHGEF28	651.061	0.677515	0.117579	5.76221	8.30176e-09	3.41935e-08
ENSG00000254852	NPIPA2								NUP62CL	134.288	0.860002	0.13487	6.37654	1.81133e-10	6.86926e-10															LRRC69	19.7888	0.976622	0.165699	5.89396	3.77044e-09	1.60847e-08
ENSG00000224712	NPIPA3								UVRAG	2562.94	-0.479181	0.0765845	-6.2569	3.92711e-10	1.45562e-09															CBWD6	68.9685	0.907268	0.124341	7.29659	2.95156e-13	1.84898e-12
ENSG00000183793	NPIPA5								ITSN2	2751.9	-0.418895	0.0560629	-7.47187	7.90615e-14	3.71537e-13															PPP2R2A	2156.48	0.426962	0.104767	4.07536	4.59425e-05	0.000122534
ENSG00000169246	NPIPB3								ZNF587	2326.31	1.04642	0.102338	10.2251	1.53071e-24	1.27651e-23															FAM95B1	1.39797	-2.15581	0.31304	-6.88669	5.7104e-12	3.1715e-11
ENSG00000185864	NPIPB4								SH2D1B	24.7802	-0.607031	0.14934	-4.06477	4.80791e-05	0.000115585															C12orf77	0.436104	-1.99692	0.470596	-4.24339	2.20169e-05	6.1455e-05
ENSG00000243716	NPIPB5								TMEM184B	5901.08	0.332634	0.0533392	6.2362	4.48331e-10	1.65556e-09															HSBP1L1	480.674	-0.696855	0.105332	-6.6158	3.69541e-11	1.90762e-10
ENSG00000177463	NR2C2								LRIG2	1439.71	-0.279276	0.0473213	-5.9017	3.5978e-09	1.24434e-08															LMCD1-AS1	16.1718	1.45937	0.171636	8.50267	1.85283e-17	1.64716e-16
ENSG00000119508	NR4A3								TYW1	1484.5	0.238001	0.0379664	6.26874	3.63988e-10	1.35181e-09															LYPLAL1-AS1	3.51868	-1.75401	0.232206	-7.55367	4.23155e-14	2.86964e-13
ENSG00000099250	NRP1								C1orf53	108.113	1.13975	0.110957	10.272	9.42299e-25	7.95756e-24															ANKRD36BP2	67.7923	-1.9227	0.279636	-6.87571	6.16808e-12	3.41705e-11
ENSG00000179915	NRXN1								FANK1	486.335	0.969546	0.118191	8.20324	2.34002e-16	1.2754e-15															FEZF1-AS1	153.555	9.1992	0.47673	19.2965	5.75187e-83	2.41799e-80
ENSG00000021645	NRXN3								LIPN	4.2574	-0.861175	0.214577	-4.01336	5.98604e-05	0.000142534															ABCA9-AS1	3.27157	3.30726	0.515127	6.42029	1.36016e-10	6.6685e-10
ENSG00000156831	NSMCE2								GIGYF2	5238.7	-0.150159	0.0472903	-3.17527	0.00149699	0.00302915															MCTS1	1815.33	0.594105	0.0817111	7.27079	3.57383e-13	2.22189e-12
ENSG00000070081	NUCB2								TCTN1	2339.8	0.32445	0.0694884	4.66913	3.02478e-06	8.19494e-06															RAP2C-AS1	29.5464	-0.574008	0.131062	-4.37969	1.1885e-05	3.42709e-05
ENSG00000069275	NUCKS1								ATP6AP1L	429.965	0.238156	0.0812701	2.93043	0.00338492	0.00652059															LYRM9	83.4353	-0.335935	0.113247	-2.96638	0.00301325	0.00605222
ENSG00000140876	NUDT7								LCMT1	2655.22	0.831433	0.0632695	13.1411	1.91365e-39	3.0478e-38															MYO16-AS1	2.88646	4.04988	0.560928	7.21997	5.19978e-13	3.18516e-12
ENSG00000133961	NUMB								TMEM191C	17.6192	0.869943	0.107018	8.12896	4.32973e-16	2.33022e-15															KCNMB2-AS1	28.0011	3.72586	0.34446	10.8165	2.87491e-27	5.03792e-26
ENSG00000124789	NUP153								DUXAP8	233.112	0.641363	0.138189	4.64119	3.46403e-06	9.33427e-06															TXNDC5	109.25	1.1642	0.266801	4.36355	1.27971e-05	3.67427e-05
ENSG00000198088	NUP62CL								SACM1L	3084.3	-0.243966	0.0480845	-5.07369	3.90168e-07	1.14584e-06															ISY1	565.384	0.330016	0.0673631	4.89906	9.62944e-07	3.17203e-06
ENSG00000136243	NUPL2								LPAL2	26.9522	-1.45319	0.114173	-12.7279	4.13733e-37	5.98844e-36															SYNPR-AS1	29.9296	0.780307	0.177272	4.40174	1.07384e-05	3.1135e-05
ENSG00000137804	NUSAP1								ARHGEF28	1300.56	-1.13165	0.0871202	-12.9895	1.40303e-38	2.15515e-37															PI4KA	2469.9	-0.538602	0.0796309	-6.76374	1.34476e-11	7.21807e-11
ENSG00000147206	NXF3								LRRC69	45.7196	0.413014	0.101097	4.08533	4.40151e-05	0.000106316															NPIPB5	145.808	1.79212	0.228116	7.85614	3.96141e-15	2.92597e-14
ENSG00000167693	NXN								HOMEZ	1541.89	0.357093	0.060273	5.92459	3.1308e-09	1.08713e-08															WDR86-AS1	5.69137	-1.18215	0.213793	-5.52943	3.21271e-08	1.24366e-07
ENSG00000256574	OR13A1								FAM95B1	1.94639	-0.587358	0.20636	-2.84628	0.0044233	0.00836784															DUXAP10	30.4312	3.76738	0.342483	11.0002	3.81244e-28	7.01035e-27
ENSG00000176294	OR4N2								C12orf77	1.22162	1.09863	0.288538	3.80757	0.000140338	0.000320944															LINC00461	3.36058	-2.44922	0.316563	-7.73691	1.01863e-14	7.29208e-14
ENSG00000183706	OR4N4								HSBP1L1	916.801	0.468503	0.0808162	5.79715	6.74521e-09	2.28589e-08															LINC00992	74.0395	-0.801041	0.194189	-4.12507	3.70623e-05	0.000100168
ENSG00000180919	OR56B4								LINC01359	46.5889	-1.64314	0.128857	-12.7516	3.05281e-37	4.43993e-36															CASC9	256.111	1.21406	0.233492	5.19961	1.9971e-07	7.11097e-07
ENSG00000214880	OR7E5P								WASH7P	49.8544	0.515803	0.124474	4.14385	3.41522e-05	8.34204e-05															GBA3	125.856	-4.93012	0.329979	-14.9407	1.79066e-50	1.30312e-48
ENSG00000141447	OSBPL1A								LYPLAL1-AS1	25.6398	-1.37347	0.111198	-12.3516	4.77562e-35	6.40953e-34															LINC00491	4.20377	2.92475	0.998002	2.93061	0.00338297	0.00672883
ENSG00000130703	OSBPL2								GUSBP11	115.04	-0.765837	0.0838622	-9.1321	6.71857e-20	4.43969e-19															PRKDC	8877.39	1.1312	0.114611	9.86986	5.62443e-23	7.3888e-22
ENSG00000101104	PABPC1L								LINC00452	1.5762	1.3711	0.288266	4.75636	1.97112e-06	5.42513e-06															CASC19	973.065	4.61749	0.186125	24.8085	7.25955e-136	1.43434e-132
ENSG00000007168	PAFAH1B1								HLA-DRB6	1322.19	0.570176	0.144075	3.9575	7.5738e-05	0.000178551															MIR2052HG	5.22554	3.55174	0.567935	6.25377	4.0065e-10	1.88186e-09
ENSG00000148832	PAOX								FEZF1-AS1	13.9257	2.6192	0.310215	8.44318	3.08815e-17	1.76542e-16															BBOX1-AS1	89.3349	4.81589	0.269843	17.847	3.04756e-71	7.21122e-69
ENSG00000100767	PAPLN								ABCA9-AS1	1.40861	-3.00402	0.215828	-13.9186	4.88321e-44	9.30536e-43															STX17-AS1	25.2494	0.518747	0.145106	3.57496	0.000350279	0.00082146
ENSG00000138801	PAPSS1								TRAF3IP2-AS1	100.567	-0.94963	0.0668184	-14.2121	7.70724e-46	1.56109e-44															WTAPP1	10.5164	1.55678	0.264654	5.88232	4.04554e-09	1.71859e-08
ENSG00000116117	PARD3B								MCTS1	2679.94	0.326611	0.0442327	7.38393	1.53687e-13	7.08708e-13															KLRC4-KLRK1	1.50376	-1.03157	0.300709	-3.43047	0.000602543	0.00136213
ENSG00000143799	PARP1								RAP2C-AS1	177.966	-0.47494	0.0787725	-6.02926	1.64713e-09	5.84285e-09															ZNF225	108.018	-0.373358	0.0887765	-4.20559	2.604e-05	7.19577e-05
ENSG00000185630	PBX1								LYRM9	322.773	-0.518444	0.0887361	-5.84254	5.14105e-09	1.75761e-08															LINC00639	17.6448	-0.73226	0.239447	-3.05813	0.0022272	0.00457646
ENSG00000179818	PCBP1-AS1								CHL1-AS1	1.31333	-2.82582	0.246872	-11.4465	2.44873e-30	2.68803e-29															MRC1	618.776	-1.28349	0.246863	-5.19917	2.00179e-07	7.12702e-07
ENSG00000175198	PCCA								MYO16-AS1	1.40043	1.70893	0.580582	2.94347	0.00324556	0.00626517															LINC01572	28.8365	1.69884	0.160178	10.6059	2.79684e-26	4.58779e-25
ENSG00000114054	PCCB								KCNMB2-AS1	41.8159	2.68795	0.283401	9.48462	2.43272e-21	1.73513e-20															SEC22B	1370.71	-0.262343	0.0711595	-3.68669	0.000227194	0.000548195
ENSG00000180628	PCGF5								LINC01471	0.537195	-0.950867	0.321874	-2.95415	0.00313527	0.00606516															NBPF15	263.837	0.647766	0.127778	5.06947	3.98927e-07	1.37269e-06
ENSG00000150593	PDCD4								AADACP1	5.67043	-2.62747	0.193195	-13.6001	4.0006e-42	7.07682e-41															WHAMMP3	12.7107	-1.10574	0.200798	-5.50675	3.6552e-08	1.40696e-07
ENSG00000178104	PDE4DIP								ISY1	983.692	0.29051	0.0638507	4.54983	5.36891e-06	1.42165e-05															HYDIN2	5.75994	-1.51454	0.267875	-5.65392	1.56833e-08	6.26063e-08
ENSG00000145431	PDGFC								SYNPR-AS1	19.3208	2.08495	0.235383	8.8577	8.16846e-19	5.10217e-18															NEFL	50.9387	-2.74478	0.408726	-6.71545	1.87492e-11	9.92223e-11
ENSG00000154553	PDLIM3								PI4KA	5934.28	0.188898	0.0616438	3.06434	0.00218149	0.00431987															SRD5A2	1.58776	1.87617	0.444728	4.21868	2.45741e-05	6.81405e-05
ENSG00000255185	PDXDC2P								WDR86-AS1	56.1693	-2.33255	0.15583	-14.9685	1.17967e-50	2.80643e-49															ACACA	2628.49	0.740561	0.093414	7.92773	2.23188e-15	1.68054e-14
ENSG00000178921	PFAS								LINC00461	26.3706	3.3255	0.326436	10.1873	2.25936e-24	1.86836e-23															LINC01163	0.797971	1.75913	0.511485	3.43925	0.000583328	0.00132202
ENSG00000170525	PFKFB3								LINC00992	56.297	2.72212	0.298877	9.10782	8.40525e-20	5.52371e-19
ENSG00000082175	PGR								CASC9	19.1609	1.97721	0.39922	4.95269	7.31936e-07	2.0969e-06
ENSG00000092621	PHGDH								PKD1P6	206.041	-0.584389	0.0913633	-6.39632	1.59171e-10	6.06527e-10
ENSG00000116793	PHTF1								LINC00989	22.7372	-1.95797	0.123717	-15.8261	2.05432e-56	5.90174e-55
ENSG00000241973	PI4KA								LINC00491	6.01439	2.00665	0.458967	4.37211	1.23053e-05	3.1473e-05
ENSG00000196455	PIK3R4								PRKDC	19660.5	0.753729	0.0896476	8.40769	4.18178e-17	2.37685e-16
ENSG00000166473	PKD1L2								TPTE2P1	25.4657	-1.18412	0.127135	-9.31382	1.23314e-20	8.47952e-20
ENSG00000244257	PKD1P1								CASC19	29.5063	0.606224	0.154797	3.91624	8.9939e-05	0.000210033
ENSG00000250251	PKD1P6								MIR2052HG	88.207	1.92271	0.299031	6.42982	1.27757e-10	4.90321e-10
ENSG00000170927	PKHD1								BBOX1-AS1	16.3728	1.16259	0.201322	5.77476	7.70623e-09	2.59838e-08
ENSG00000065243	PKN2								PDXDC2P	2.73061	0.483043	0.147294	3.27945	0.00104011	0.00214882
ENSG00000182621	PLCB1								ZNF225	381.681	-0.287498	0.057977	-4.95882	7.09232e-07	2.03481e-06
ENSG00000197943	PLCG2								OR13A1	5.28119	0.906231	0.210724	4.30057	1.70361e-05	4.28961e-05
ENSG00000129219	PLD2								PSMA3-AS1	1917.4	-0.263067	0.056443	-4.66075	3.15064e-06	8.51913e-06
ENSG00000107679	PLEKHA1								LINC00639	78.3118	-1.47534	0.165248	-8.92804	4.33607e-19	2.7435e-18
ENSG00000105559	PLEKHA4								ADAM20P1	16.9546	-0.325281	0.111266	-2.92346	0.00346164	0.00665935
ENSG00000166689	PLEKHA7								ULK4P2	1.97752	-1.43641	0.140008	-10.2595	1.0724e-24	9.01933e-24
ENSG00000115762	PLEKHB2								MRC1	1030.02	-1.80016	0.172574	-10.4313	1.78505e-25	1.56238e-24
ENSG00000148735	PLEKHS1								LINC01572	21.1309	0.874059	0.121918	7.16924	7.54162e-13	3.34527e-12
ENSG00000183281	PLGLB1								ULK4P1	0.304991	-1.59647	0.323024	-4.94227	7.72183e-07	2.20747e-06
ENSG00000125551	PLGLB2								DLGAP1-AS4	1.37496	1.27467	0.323654	3.93839	8.20307e-05	0.000192685
ENSG00000114554	PLXNA1								SEPT4-AS1	19.3297	0.460523	0.113617	4.05329	5.05016e-05	0.000121178
ENSG00000152359	POC5								SEC22B	4199.41	0.277655	0.0658016	4.21959	2.44751e-05	6.06845e-05
ENSG00000070501	POLB								ZNF559-ZNF177	8.09352	-0.697947	0.129398	-5.39382	6.89757e-08	2.16086e-07
ENSG00000101751	POLI								PTGER4P2-CDK2AP2P2	8.48998	0.412346	0.1417	2.91001	0.00361422	0.00693202
ENSG00000122008	POLK								WHAMMP3	116.098	-1.46153	0.0879425	-16.6192	5.06227e-62	1.75272e-60
ENSG00000068654	POLR1A								HYDIN2	65.9147	-0.646508	0.145218	-4.45198	8.50807e-06	2.21059e-05
ENSG00000102978	POLR2C								NEFL	47.7663	1.79747	0.227423	7.90365	2.70844e-15	1.38804e-14
ENSG00000186141	POLR3C								SRD5A2	39.518	2.43318	0.200242	12.1512	5.65469e-34	7.28147e-33
ENSG00000146707	POMZP3								LINC01163	3.04575	1.29995	0.234692	5.53897	3.04258e-08	9.80587e-08
ENSG00000132429	POPDC3
ENSG00000106536	POU6F2
ENSG00000138777	PPA2
ENSG00000100034	PPM1F
ENSG00000150722	PPP1R1C
ENSG00000184203	PPP1R2
ENSG00000221914	PPP2R2A
ENSG00000074211	PPP2R2C
ENSG00000146143	PRIM2
ENSG00000164306	PRIMPOL
ENSG00000108946	PRKAR1A
ENSG00000166501	PRKCB
ENSG00000171132	PRKCE
ENSG00000253729	PRKDC
ENSG00000138669	PRKG2
ENSG00000160310	PRMT2
ENSG00000132600	PRMT7
ENSG00000164169	PRMT9
ENSG00000101161	PRPF6
ENSG00000257621	PSMA3-AS1
ENSG00000161057	PSMC2
ENSG00000275450	PTGER4P2-CDK2AP2P2
ENSG00000169398	PTK2
ENSG00000158079	PTPDC1
ENSG00000196396	PTPN1
ENSG00000072135	PTPN18
ENSG00000134242	PTPN22
ENSG00000126838	PZP
ENSG00000118873	RAB3GAP2
ENSG00000127328	RAB3IP
ENSG00000144566	RAB5A
ENSG00000152061	RABGAP1L
ENSG00000079974	RABL2B
ENSG00000164754	RAD21
ENSG00000113522	RAD50
ENSG00000182185	RAD51B
ENSG00000010017	RANBP9
ENSG00000232160	RAP2C-AS1
ENSG00000185989	RASA3
ENSG00000058335	RASGRF1
ENSG00000188739	RBM34
ENSG00000117906	RCN2
ENSG00000109047	RCVRN
ENSG00000121039	RDH10
ENSG00000137710	RDX
ENSG00000128276	RFPL3
ENSG00000205853	RFPL3S
ENSG00000181827	RFX7
ENSG00000159496	RGL4
ENSG00000187627	RGPD1
ENSG00000185304	RGPD2
ENSG00000182732	RGS6
ENSG00000007384	RHBDF1
ENSG00000067560	RHOA
ENSG00000188026	RILPL1
ENSG00000026297	RNASET2
ENSG00000022840	RNF10
ENSG00000011275	RNF216
ENSG00000234377	RNF219-AS1
ENSG00000135119	RNFT2
ENSG00000181031	RPH3AL
ENSG00000184319	RPL23AP82
ENSG00000163902	RPN1
ENSG00000186468	RPS23
ENSG00000081019	RSBN1
ENSG00000159579	RSPRY1
ENSG00000163785	RYK
ENSG00000116497	S100PBP
ENSG00000211456	SACM1L
ENSG00000136715	SAP130
ENSG00000133812	SBF2
ENSG00000140386	SCAPER
ENSG00000092108	SCFD1
ENSG00000135094	SDS
ENSG00000148396	SEC16A
ENSG00000265808	SEC22B
ENSG00000107651	SEC23IP
ENSG00000187742	SECISBP2
ENSG00000138593	SECISBP2L
ENSG00000170381	SEMA3E
ENSG00000138468	SENP7
ENSG00000264672	SEPT4-AS1
ENSG00000132824	SERINC3
ENSG00000230438	SERPINB9P1
ENSG00000198964	SGMS1
ENSG00000198574	SH2D1B
ENSG00000178217	SH2D4B
ENSG00000162105	SHANK2
ENSG00000164054	SHISA5
ENSG00000176974	SHMT1
ENSG00000144736	SHQ1
ENSG00000072858	SIDT1
ENSG00000039123	SKIV2L2
ENSG00000113558	SKP1
ENSG00000173638	SLC19A1
ENSG00000184999	SLC22A10
ENSG00000151475	SLC25A31
ENSG00000117620	SLC35A3
ENSG00000127526	SLC35E1
ENSG00000151812	SLC35F4
ENSG00000139974	SLC38A6
ENSG00000196950	SLC39A10
ENSG00000070214	SLC44A1
ENSG00000137968	SLC44A5
ENSG00000050438	SLC4A8
ENSG00000148942	SLC5A12
ENSG00000232287	SLC6A1-AS1
ENSG00000227028	SLC8A1-AS1
ENSG00000065923	SLC9A7
ENSG00000084453	SLCO1A2
ENSG00000108055	SMC3
ENSG00000113810	SMC4
ENSG00000157106	SMG1
ENSG00000185420	SMYD3
ENSG00000064692	SNCAIP
ENSG00000170677	SOCS6
ENSG00000110693	SOX6
ENSG00000185404	SP140L
ENSG00000144451	SPAG16
ENSG00000155761	SPAG17
ENSG00000008294	SPAG9
ENSG00000162814	SPATA17
ENSG00000234070	SPATA17-AS1
ENSG00000106686	SPATA6L
ENSG00000164808	SPIDR
ENSG00000118785	SPP1
ENSG00000203785	SPRR2E
ENSG00000277893	SRD5A2
ENSG00000196220	SRGAP3
ENSG00000167881	SRP68
ENSG00000124783	SSR1
ENSG00000184005	ST6GALNAC3
ENSG00000136011	STAB2
ENSG00000159433	STARD9
ENSG00000102572	STK24
ENSG00000104375	STK3
ENSG00000196335	STK31
ENSG00000169302	STK32A
ENSG00000152953	STK32B
ENSG00000163482	STK36
ENSG00000090372	STRN4
ENSG00000134910	STT3A
ENSG00000117758	STX12
ENSG00000255145	STX17-AS1
ENSG00000116266	STXBP3
ENSG00000175600	SUGCT
ENSG00000130540	SULT4A1
ENSG00000164828	SUN1
ENSG00000109111	SUPT6H
ENSG00000165124	SVEP1
ENSG00000197321	SVIL
ENSG00000198765	SYCP1
ENSG00000131018	SYNE1
ENSG00000241359	SYNPR-AS1
ENSG00000067715	SYT1
ENSG00000164691	TAGAP
ENSG00000109680	TBC1D19
ENSG00000146350	TBC1D32
ENSG00000204634	TBC1D8
ENSG00000145348	TBCK
ENSG00000113649	TCERG1
ENSG00000204852	TCTN1
ENSG00000162782	TDRD5
ENSG00000136891	TEX10
ENSG00000120498	TEX11
ENSG00000121101	TEX14
ENSG00000151575	TEX9
ENSG00000105825	TFPI2
ENSG00000186340	THBS2
ENSG00000172009	THOP1
ENSG00000113845	TIMMDC1
ENSG00000137251	TINAG
ENSG00000104067	TJP1
ENSG00000101337	TM9SF4
ENSG00000166069	TMCO5A
ENSG00000139173	TMEM117
ENSG00000152558	TMEM123
ENSG00000152128	TMEM163
ENSG00000198792	TMEM184B
ENSG00000164168	TMEM184C
ENSG00000278558	TMEM191B
ENSG00000206140	TMEM191C
ENSG00000137842	TMEM62
ENSG00000185973	TMLHE
ENSG00000224533	TMLHE-AS1
ENSG00000138594	TMOD3
ENSG00000133687	TMTC1
ENSG00000166479	TMX3
ENSG00000041982	TNC
ENSG00000090905	TNRC6A
ENSG00000173726	TOMM20
ENSG00000162341	TPCN2
ENSG00000111907	TPD52L1
ENSG00000180438	TPRXL
ENSG00000133112	TPT1
ENSG00000132958	TPTE2
ENSG00000253771	TPTE2P1
ENSG00000205822	TPTE2P6
ENSG00000231889	TRAF3IP2-AS1
ENSG00000167632	TRAPPC9
ENSG00000197323	TRIM33
ENSG00000152503	TRIM36
ENSG00000147573	TRIM55
ENSG00000103671	TRIP4
ENSG00000104321	TRPA1
ENSG00000104447	TRPS1
ENSG00000103197	TSC2
ENSG00000154743	TSEN2
ENSG00000155158	TTC39B
ENSG00000104723	TUSC3
ENSG00000239264	TXNDC5
ENSG00000198874	TYW1
ENSG00000144744	UBA3
ENSG00000131508	UBE2D2
ENSG00000132388	UBE2G1
ENSG00000114062	UBE3A
ENSG00000151148	UBE3B
ENSG00000157741	UBN2
ENSG00000024048	UBR2
ENSG00000144357	UBR3
ENSG00000136731	UGGT1
ENSG00000173610	UGT2A1
ENSG00000271271	UGT2A2
ENSG00000147854	UHRF2
ENSG00000168038	ULK4
ENSG00000261279	ULK4P1
ENSG00000260128	ULK4P2
ENSG00000178081	ULK4P3
ENSG00000198722	UNC13B
ENSG00000094841	UPRT
ENSG00000140740	UQCRC2
ENSG00000138768	USO1
ENSG00000162402	USP24
ENSG00000188933	USP32P1
ENSG00000233327	USP32P2
ENSG00000106346	USP42
ENSG00000145390	USP53
ENSG00000114374	USP9Y
ENSG00000152818	UTRN
ENSG00000198382	UVRAG
ENSG00000141968	VAV1
ENSG00000165280	VCP
ENSG00000100483	VCPKMT
ENSG00000165637	VDAC2
ENSG00000112299	VNN1
ENSG00000154978	VOPP1
ENSG00000141252	VPS53
ENSG00000156931	VPS8
ENSG00000100749	VRK1
ENSG00000101842	VSIG1
ENSG00000112290	WASF1
ENSG00000227232	WASH7P
ENSG00000163625	WDFY3
ENSG00000143951	WDPCP
ENSG00000131725	WDR44
ENSG00000103091	WDR59
ENSG00000166415	WDR72
ENSG00000243836	WDR86-AS1
ENSG00000140527	WDR93
ENSG00000180083	WFDC11
ENSG00000276141	WHAMMP3
ENSG00000255282	WTAPP1
ENSG00000143184	XCL1
ENSG00000108039	XPNPEP1
ENSG00000152422	XRCC4
ENSG00000114127	XRN1
ENSG00000173950	XXYLT1
ENSG00000166913	YWHAB
ENSG00000116809	ZBTB17
ENSG00000144161	ZC3H8
ENSG00000102383	ZDHHC15
ENSG00000163812	ZDHHC3
ENSG00000169946	ZFPM2
ENSG00000084073	ZMPSTE24
ENSG00000188629	ZNF177
ENSG00000147118	ZNF182
ENSG00000267680	ZNF224
ENSG00000256294	ZNF225
ENSG00000159882	ZNF230
ENSG00000188283	ZNF383
ENSG00000119725	ZNF410
ENSG00000074657	ZNF532
ENSG00000270011	ZNF559-ZNF177
ENSG00000189042	ZNF567
ENSG00000161551	ZNF577
ENSG00000198466	ZNF587
ENSG00000075292	ZNF638
ENSG00000147180	ZNF711
ENSG00000103310	ZP2
[truncated: 178 more columns]
