# Supplementary material for: Pan cancer characterization of genes whose expression has been associated with LINE-1 antisense promoter activity
Source: Mob DNA. 2023 Sep 18;14:13. doi: 10.1186/s13100-023-00300-x (PMC10506190; doi:10.1186/s13100-023-00300-x)
Supplement: Supplementary file 5 — Additional file 5. Table S2. The expression of L1 ASP-associated genes was correlated with patient’s prognosis. [file 13100_2023_300_MOESM5_ESM.xlsx]

## Sheet: Table S2
Table S2. The expression of L1 ASP-associated genes was correlated with patient's prognosis
gene name
sample	TCGA-77-A5GA-01A	TCGA-58-8387-01A	TCGA-43-5668-01A	TCGA-NC-A5HJ-01A	TCGA-70-6722-01A	TCGA-90-7769-01A	TCGA-56-8504-01A	TCGA-66-2800-01A	TCGA-85-7697-01A	TCGA-85-8049-01A	TCGA-18-4086-01A	TCGA-33-4532-01A	TCGA-63-A5MJ-01A	TCGA-NK-A5CX-01A	TCGA-98-8020-01A	TCGA-56-A5DS-01A	TCGA-77-A5G6-01A	TCGA-22-1016-01A	TCGA-66-2785-01A	TCGA-56-A5DR-01A	TCGA-85-7698-01A	TCGA-39-5022-01A	TCGA-L3-A4E7-01A	TCGA-56-A4ZJ-01A	TCGA-21-5786-01A	TCGA-22-1012-01A	TCGA-63-A5MR-01A	TCGA-22-5471-01A	TCGA-NC-A5HL-01A	TCGA-18-3411-01A	TCGA-92-8065-01A	TCGA-NK-A7XE-01A	TCGA-77-8133-01A	TCGA-58-A46J-01A	TCGA-22-5489-01A	TCGA-66-2758-01A	TCGA-98-A53B-01A	TCGA-90-A4ED-01A	TCGA-56-7580-01A	TCGA-18-3417-01A	TCGA-60-2720-01A	TCGA-63-A5MP-01A	TCGA-18-3414-01A	TCGA-22-5473-01A	TCGA-96-7545-01A	TCGA-18-3416-01A	TCGA-NK-A5CT-01A	TCGA-77-8130-01A	TCGA-46-6025-01A
GABRA3	1.91408	0.601383	1.54622	0.0478317	0.389858	1.57891	1.3135	2.25152	1.24049	1.53851	1.7251	1.68637	0.505445	0.973285	1.9659	1.2662	2.96397	2.21517	2.15947	1.13711	1.25282	1.06996	1.33649	0.735348	1.96783	1.74636	0.424306	1.71864	0.970404	1.88202	2.21084	2.63417	1.27902	1.0004	1.71329	1.1323	1.43226	1.38124	1.61924	1.1738	1.26135	2.56572	2.07054	2.20475	1.10418	0.0252237	1.91336	0.743838	1.09557
KC6	0.584444	1.98627	0.00354435	0.16709	0.259641	0.374717	0.658761	1.17939	0.8136	0.299919	0.824564	1.25392	0.555846	0.0293043	0.433865	1.07427	2.54428	0.728837	0.103527	0.256012	0.791286	0.549064	0.0241158	0.0612082	0.259819	0.822089	0.717642	1.1852	2.71459	1.32909	1.36061	0.0433106	1.32154	1.42807	0.594544	1.65492	0.536689	2.76999	1.55216	0.198605	0.269334	0.969946	1.29212	0.674533	1.27027	0.900048	0.61851	0.475804	0.590432
AKR1C2	7.93583	2.69383	1.8865	1.12025	0.928312	7.05244	7.8709	6.66891	4.59048	7.0964	7.75724	7.87133	7.07439	2.20252	0.833089	4.07356	1.28045	0.903641	1.59584	7.0058	8.03062	6.63158	3.74323	3.78538	0.274623	7.73118	3.37241	4.70057	7.82155	7.53101	1.22474	6.97285	6.13619	1.38481	1.11789	8.60433	5.63114	0.704336	2.54446	4.47793	2.23165	8.25272	4.00969	8.81639	8.18559	7.7949	1.44054	2.7439	6.71006
CASC19	1.96057	2.22359	0	0.089756	0.0416577	3.2542	2.26503	3.69154	2.81411	1.13205	2.39174	2.95837	4.45284	0.491061	0.101413	2.25974	0.17656	0	0.0672677	0.291281	2.3881	1.20197	2.13433	0.267719	0.1584	2.77947	4.16716	4.96203	2.47154	2.04024	1.4794	1.5885	1.00066	3.0566	0.0520346	3.58998	1.85178	0	0.0659682	2.12305	0.161237	3.74286	0.0664267	2.49485	3.91487	1.3852	0	0.0876851	1.028
POPDC3	2.8209	0.540175	0.174667	2.2577	0.598774	0.136192	0.043969	2.64178	1.01579	3.06681	1.4202	0.521233	0.434729	0	2.70016	0.0179648	0.0714894	0.385679	1.49839	1.96854	2.43062	1.14315	0.016646	0.728071	0.674682	3.13344	2.10042	1.38273	3.89851	3.34527	2.62233	1.83177	0.17062	0.639316	1.80176	1.31251	5.56211	1.64745	0.101689	2.56067	1.96176	1.7248	0.518128	0.196497	0.771486	0.0373272	0.0336319	1.01062	2.00336
PHGDH	4.7855	4.26074	2.62253	5.14543	3.95223	4.15194	5.44166	3.29286	3.24023	3.3076	4.38199	5.19329	4.01236	2.76485	2.76144	3.35494	7.80579	4.7401	4.40852	4.32645	4.77164	4.18025	2.4867	2.6805	4.74361	3.46948	1.52781	5.66614	5.18258	4.87256	2.84763	3.52907	3.33773	4.57007	3.87906	4.68908	3.69119	6.19588	5.34399	3.42263	5.58927	3.61769	4.55047	4.6591	3.53262	5.3768	0.619747	1.97563	2.98345
AKR1C1	7.63827	2.06734	0.157545	1.52073	1.57185	6.58375	7.2872	7.67055	4.44283	6.01188	8.6939	8.42803	6.19783	3.82727	0.795078	4.19435	0.797639	1.12212	3.24805	6.18361	8.06544	6.53114	2.26835	2.86711	0.213002	6.27657	1.26186	4.52971	7.67267	8.18397	2.69426	6.73001	4.949	1.77414	1.45062	6.93209	4.34764	0.577457	2.24894	2.79945	2.34266	8.23903	2.68619	8.04649	7.45077	8.59668	1.15079	1.31863	7.13889
XXYLT1	4.25151	5.54131	1.979	2.31131	2.42198	3.6916	3.83808	4.89322	4.36723	2.89093	3.87282	4.29242	3.76482	3.6885	2.70031	4.13191	4.53453	2.98141	2.22118	3.7067	3.62324	2.5993	2.90406	3.43137	3.88756	3.87614	3.17432	5.39052	4.89364	3.93034	3.66434	3.6688	4.52012	4.0218	3.82775	3.89999	3.20735	2.89822	4.18959	3.47018	3.27931	5.16287	3.26017	4.71809	4.81144	4.38308	2.27457	2.5148	3.97212
ACVR1C	0.444383	0.950555	0.297066	0.431286	0.356852	0.311898	0.5165	0.234449	0.560099	0.198745	0.19747	0.527954	1.04206	1.46315	1.30325	0.847784	0.586333	0.200253	0.20941	1.66545	0.278388	0.499681	0.515706	0.310435	0.228208	1.00194	0.822502	0.189607	0.441426	0.432628	1.79739	0.438097	0.737884	0.450178	1.0507	0.675147	0.884579	0.97282	0.409978	0.515588	0.6255	0.51189	1.06146	0.463709	0.835105	0.514958	0.698137	1.07415	0.659552
CASC9	3.39269	4.3619	2.30076	0.834841	3.07186	2.70497	4.14053	3.6948	3.92628	2.38817	2.96386	3.78572	3.84274	2.8721	4.29128	2.60223	4.64401	2.31108	2.05773	3.40809	3.32579	2.39136	0	0.0182078	3.1386	3.27646	4.03005	3.10469	3.90802	4.3428	2.74605	3.16454	2.76701	3.93576	1.79898	3.24459	3.29537	2.94385	3.70636	3.88865	2.52924	1.98268	4.80867	2.78992	2.55672	3.91404	3.23313	2.99619	2.61604
DYNC1I1	1.66168	1.59165	0.313445	2.83948	1.01878	1.71348	1.3603	2.60528	1.23241	0.722505	2.73716	0.469324	0.848835	1.38674	0.701357	0.226838	1.81372	0.851616	1.52942	1.5848	1.4536	1.42226	0.369046	0.444031	1.35447	3.18894	2.43255	1.52386	1.65835	2.16471	1.67404	0.692694	2.04429	0.855714	1.52584	2.36044	0.888843	0.703923	0.641624	1.61985	1.45589	0.994623	2.81209	3.6669	1.53061	0.706105	1.66698	0.196608	1.37824
SPRR2E	7.41522	3.36607	0.502454	0.470033	0.624777	9.84881	3.60197	6.10899	9.01993	6.42025	6.88536	4.93183	7.7345	3.95516	4.83979	5.9379	4.36864	0.426114	0.252079	5.73596	5.3372	4.09471	2.49554	3.58319	3.40509	9.82203	6.74005	4.61571	0	2.52016	4.86345	2.45436	5.19393	1.61148	2.38501	1.93946	1.23823	0	0.747099	0	2.50352	5.37081	4.76921	5.55724	3.84217	3.73614	1.46091	7.1633	0.616613
TDRD5	1.62699	1.83622	1.16121	0.973151	0.00363996	0.00525082	1.52637	1.05725	1.13091	1.69319	0.388112	1.0929	0.06529	0.0143409	0.778952	0.630636	0.460559	1.07366	1.30654	0.266119	0.818961	1.42659	0.00738064	0.138947	2.2778	2.45445	2.97232	1.41227	0.460404	1.33266	0.00693571	0.865691	2.25116	0.0610632	1.93661	0.390896	1.73546	3.32987	1.12839	0	0.434857	0.789604	2.21937	0.69805	0.411681	1.54458	0.0297682	0.0384612	0.0729703
GDA	3.13978	0.272434	0.141657	0.123553	0.0425406	2.29717	1.18761	1.44232	1.15129	0.505248	1.88898	2.54812	0.778878	1.2145	0.0620634	1.22766	0.601062	0.134887	0.0284929	0.315126	4.47834	1.9139	0.913617	0.258764	0.229501	1.4103	1.09247	1.20611	2.10513	0.656393	0.314891	0.188792	2.06472	2.03676	0.0555027	0.484379	0.460594	0.0187743	2.16637	0.684561	1.37113	1.21363	2.38779	2.0475	2.54108	1.35053	0.0201037	0.474969	0.838783
GABRG2	0	0.122554	0.00412774	0.245387	0	0.00502568	0	0.163601	0.781145	0	0	0.014413	0.0226503	0	0.303797	0.00762609	0.630351	0.0058326	0.104125	0.453409	0	0.0401837	0	0	1.15231	0.0521854	0.91402	0.0152475	0	0	1.70891	0	0.59208	0.67431	1.42176	0.00510635	0	3.00345	0	0.106223	0.704361	0	0.011177	0.0351838	0	0	1.84753	0.0222108	0.470855
C12orf77	0	0.0378194	0.0294188	0.192614	0.125998	0	0	0.0237568	0.0381473	0.0133611	0.020286	0.0258049	0.0163213	0	0	0.0136791	0	0	0	0	0.0166861	0.0574376	0	0.0640153	0.0164631	0.0135816	0	0.00915513	0	0.00948669	0	0	0.327152	0	0.0233889	0.00916571	0	0	0.0395065	0	0.0125979	0.0214526	0.0299401	0	0.0434048	0	0	0	0
KCNH8	0.229766	0.304679	0.0266618	0.740333	0.199936	0.641875	0.0270637	0.706093	0.240182	0.557537	0.454586	0.126961	0.029421	0.217252	0.0310222	0.137076	0.13375	0.0661008	0.0325155	0.0238855	0.757434	0.265747	0.0253873	0.101691	0.00332756	0.274219	0.214009	0.0436816	1.29709	0.708851	0.0750209	0.0663651	0.713842	0.0467316	0.4844	1.01123	0.0863197	1.53119	0.0318799	0.0099324	0.00508271	0.915467	0.360748	0.261421	0.285432	0.0342973	0.299732	0.0267339	0.0956731
GNGT1	0.825937	1.43919	0.467975	0.747169	1.20313	1.55208	1.73547	1.36917	1.28874	1.09149	1.34242	1.11936	1.02659	0.767501	0.636614	0.99875	1.29096	0.367313	0.731464	1.02475	1.68641	0.767431	1.38846	0.397202	1.68112	1.51268	0.914441	0.826846	1.27684	1.62008	1.2517	0.553896	1.26319	0.678163	0.995179	1.82013	0.843451	0	1.81408	1.10522	0.724653	1.08747	1.78201	1.95931	1.04444	1.46704	0.969618	0.637114	1.21539
DDIAS	1.95011	2.4767	2.05815	1.46956	2.0998	2.74538	2.1855	2.74272	2.23646	1.53886	2.35173	2.46507	2.95828	1.29241	1.63342	2.19818	2.21342	1.06574	1.89527	2.66892	2.01253	1.40425	1.61576	0.555366	1.78728	2.70153	2.10404	2.03886	3.48895	2.14034	1.6471	1.53716	1.77519	2.06862	2.02138	2.07997	2.20472	1.12622	1.49257	1.17943	1.5002	3.15566	2.1121	2.26581	1.55114	2.76537	1.38748	0.649465	1.6871
SLC5A12	0.133207	0.449789	0.0289478	0.129193	0.00820105	0.437026	0.182731	0.214902	0.511257	0.077137	0.262656	0.410847	0.140917	0.703458	0.395395	0.981674	1.78037	0.446758	0.470355	0.234945	0.556944	0.135184	0.623954	0.0248289	0.661285	0.410119	0.254303	0.156815	0.180541	0.24091	1.57756	0.493703	0.46009	0.407992	0.687985	0.241035	0.295654	0.219935	0.471902	0.332255	0.917427	0.258839	0.782223	0.660184	0.668085	0.177225	0.782741	0.0218241	0.563265
DUXAP8	0.13972	2.44624	1.10208	0.661787	1.03763	1.27268	0.197825	3.02655	1.67145	0.339912	0.652396	1.31439	0.320466	0.22015	1.90957	0.770267	1.47919	0.945553	1.2551	0.598899	0.670563	1.00902	0.644268	1.27725	1.16626	1.02127	0.918519	1.04821	0.719972	2.03649	1.27521	0.569477	0.521385	1.01583	0.872877	0.765134	0.539391	2.07109	2.79029	0.597598	0.524329	0.863863	2.24277	1.2871	0.173891	0.0871093	0.0285721	0.358426	0.511316
MUCL1	0.53715	0.682168	1.05692	0.519505	0.0843484	1.39304	0.328978	2.96085	0.421588	0.546336	0.869304	0.561949	2.34042	0.900994	3.34963	0.77947	1.14013	0.0610654	1.63322	0.135573	0.523521	1.61349	2.24932	0.104111	0.778639	2.12752	0.198452	1.70281	0.0770451	0.0734498	0.391492	0.41876	0.704623	4.479	1.29612	1.22473	0	0.41283	0.253764	0.140038	1.23509	0.407247	0.816307	1.38617	0.496785	0.0558095	1.07056	2.19195	0.254231
IL20RB	4.22118	2.57747	1.72381	0.59875	2.7119	2.6269	3.22771	1.94122	6.33847	2.59572	1.61743	3.23382	1.96646	1.6028	4.649	5.71878	2.4317	0.764963	3.32745	2.55189	3.71697	1.29431	1.8318	4.25686	0.905028	0.960683	7.1909	4.29999	0.414379	1.35851	6.00013	6.0653	5.00344	1.37836	2.66724	0.677479	1.57366	1.09107	2.52685	5.07322	2.47116	0.453838	2.83018	2.87303	2.07324	0.611941	4.57514	6.98391	5.29135
EPHB1	0.0932333	1.57716	0.240428	0.803286	0.258577	0.0412458	1.68034	0.592489	0.697189	0.800128	0.252637	2.90898	2.0581	0.14661	0.535593	0.439115	1.90723	0.268551	0.0604772	0.0624871	0.329437	0.546416	0.194534	0.199024	0.360295	0.652498	0.102471	0.19808	0.194815	0.123222	2.01327	0.0640406	0.684637	2.26023	1.24367	0.166596	0.076554	0.167087	0.262973	0.126429	0.522764	0.59768	1.89038	0.112215	0.366205	0.344074	0.110662	0.101294	0.0730558
GTSE1	2.96398	3.32307	1.77314	2.40252	2.40699	1.97731	3.79048	2.92951	2.57228	1.84333	2.80136	1.86886	2.69766	1.72696	2.84286	2.80634	3.05969	1.95265	2.71149	2.21979	2.85973	2.12554	2.44112	1.58179	2.67918	2.99905	2.30447	2.73514	1.80071	2.78225	1.44683	2.97337	3.739	2.93622	2.55826	2.79104	1.90925	2.80563	3.80669	1.35159	1.89775	2.25884	3.14793	2.65661	1.83826	2.89958	2.56066	1.78906	2.11006
ADAM12	2.94318	0.910513	1.96054	0.474508	3.27107	1.5114	2.67715	2.85943	2.28863	3.84264	3.23175	0.458743	3.01659	2.81229	2.76222	1.75737	0.849566	2.206	1.63801	2.4243	3.41315	2.35642	1.24916	3.24767	2.14203	1.86826	1.32298	1.33471	1.16062	4.4328	1.85138	0.51832	1.59824	0.932687	3.83	2.84286	1.36982	0.38059	2.17783	3.02842	1.4979	2.11157	1.26278	2.74283	2.39911	2.98146	2.88103	3.26648	2.08543
KRT17P5	0	0	0	0	0.00518013	0	0	0.0196913	0.006385	0	0.0251437	0.0972204	0.0202363	0	0	0.0775123	0	0	0	0	0	0.00604982	0	0	0.0204117	0.0769717	0.00985201	0.00758185	0.0109901	0.038862	0	0	0.0126091	0	0	0	0	0	0	0	0	0.023657	0	0.00660853	0.0145156	0.0352608	0.0106672	0	0
NCAPD2	4.87492	5.15106	3.99365	5.15885	5.46468	4.54671	5.84302	4.81534	5.45838	5.36917	4.7147	4.91975	5.12556	4.00702	4.72177	4.46445	5.91693	4.84179	5.14731	5.29985	4.94457	4.03741	4.6136	3.69596	6.68528	5.59121	4.80644	5.748	5.01826	4.43391	3.84602	5.77935	6.07014	5.12407	5.96184	4.74961	4.45439	4.51252	4.98748	5.44312	3.94105	4.27067	4.20516	5.27386	4.93858	4.80676	4.58103	3.6922	4.83551
LRRC9	0.0873206	0.0948932	0.070848	0.0127302	0.0116244	0.0291831	0.0693924	0.102196	0.12404	0.0124401	0.0467713	0.174772	0.124345	0.0342072	0.077657	0.00638222	0.276449	0.0194248	0.0282452	0.0653464	0.11985	0.050246	0.00591196	0.0301456	0.0640542	0.0981902	0.0598822	0.0830478	0.163997	0.198337	0.0706033	0.0071228	0.129321	0.0587129	0.0181744	0.0911979	0.047926	0.184376	0.133434	0.0228708	0.0689868	0.164589	0.341128	0.0867229	0.0364483	0.140148	0.104484	0	0.0743179
DPY19L2P1	0.132558	0.141787	0	0.0405123	0	0.201735	0.0251598	0.225071	0.0918181	0.0317646	0.0302312	0.070909	0.149113	0.0329888	0.0548781	0.0122794	0.12752	0.140592	0.0272372	0.0248451	0.0371632	0.0891917	0.0038021	0.0226608	0.0747837	0.538655	0.0933597	0.0801375	0.158402	0.179129	0.4769	0.0672402	0.118549	0.0442431	0.140978	0.0486701	0.0411631	0.00450702	0.0442357	0.0220532	0.383249	0.255991	0.379664	0.651397	0.264196	0.0381845	0.108045	0.0159552	0.255958
CHL1-AS1	0	0.192795	0.0778537	0	0.013437	0	0.2355	0.0255602	0.0165514	0	0	0.20844	0.11868	0.127646	0	0.219217	0.368576	0	0	0	0.0179561	0.0465538	0.204123	0.134474	0.0525091	0.0575981	0	0	0	0	0.0752595	0	0.0325745	0.418246	0.0334563	0	0.0492519	0.0943416	0	0	0.0269902	0.0901938	0.0637121	0.0836797	0	0.0606136	0.450813	0.137604	0.0249861
TRPA1	0.247624	0.161568	0.257988	0.180136	1.42817	0.211855	0.208114	0.662609	0.109698	0.482394	1.29782	0.671571	0.985419	0.278999	0.127241	0.0979116	0.0214578	0.121114	3.29173	0.413103	0.618055	1.17165	0.0147398	0.0981611	0.386501	0.350736	0.226784	0.186888	0.603793	1.85227	0.474216	0.184159	0.0524585	0.0247632	3.07107	0.286955	0.0223937	0.0797323	0.313056	0.491881	0.351183	0.11027	0.778974	0.726131	0.230204	0.187975	0.0149772	0.345368	0.923791
SPP1	11.0686	4.69647	4.97531	3.53939	8.31398	7.5442	9.1704	9.84078	4.023	9.49023	11.4496	6.66554	9.81326	7.9811	8.00964	5.31031	5.78608	6.60597	8.66305	7.40653	9.14831	9.31768	7.31129	7.2468	5.66384	9.16392	7.8696	6.44881	12.089	11.1169	7.48464	7.90803	7.45783	6.30106	9.28513	10.923	4.79088	6.76894	6.76951	8.48264	7.08402	6.34537	7.70762	9.05441	8.05844	6.91856	8.71296	6.15444	9.78651
PPP2R2C	2.70509	0.346506	0.0778043	1.69873	2.27042	3.06396	2.51229	2.94838	2.03018	2.94896	3.81219	2.8639	2.67835	2.33277	2.49206	2.09585	0.139196	1.30846	0.128713	3.51401	2.57138	1.98171	0.189059	2.01098	2.33849	1.51715	1.11705	2.21422	2.50567	1.92808	2.2967	2.48608	2.88888	0.0538194	2.68134	3.13101	1.69436	0.00405392	0.328552	1.41769	2.41316	2.23771	0.887368	3.16752	3.37644	2.53739	0.762958	2.91135	3.68099
CNTD2	1.04081	0.0681084	4.25244	0.465994	0.123852	0.155958	0.118552	0.324024	0.48195	0.109727	0.07251	0.205748	0.114803	0.663442	1.59386	0.216397	0.554485	0.510039	3.08891	0.467333	0.117282	1.11387	0.201483	0.102189	0.377835	0.589725	0.733752	0.216867	1.59881	0.194196	0.989691	0.88881	0.0724116	0.148337	0.187535	0.0547312	1.88012	0.0714533	0.0595023	0.772498	1.00787	0.117463	0.287483	0.627751	0.0106536	0.0681338	0.753073	0.848637	1.25585
COL11A1	1.01962	1.68448	2.47313	0.0682653	4.1588	2.31955	3.81689	2.17035	3.98575	4.52439	3.00957	0.301349	4.74128	3.75988	3.21636	2.53519	1.24139	1.17344	2.11707	4.32046	5.22002	3.33933	1.38902	2.98213	3.07448	1.81434	1.53393	2.74284	0.831759	2.42393	1.78733	1.30494	0.798828	0.592254	5.02679	1.88436	0.875961	3.8198	2.79055	4.60682	0.571122	0.648937	3.08407	3.48432	0.775087	0.359913	0.877645	4.46051	3.01319
LINC00992	1.1491	0.573611	1.9495	0.0582264	1.0506	2.07085	0	1.58149	0.202459	0.528737	0.467584	1.1269	1.35054	0.754939	0.482494	0.599374	0.0298163	0.511142	0.675522	0.147513	1.08373	0.883945	0.384381	0.218511	1.32283	1.01631	1.76513	1.64161	1.78971	1.88059	2.1278	1.55184	1.40673	0.61427	0.0168983	1.13693	1.09329	1.31801	0.926434	0.103334	0.717974	0.79439	1.25743	2.27102	1.13023	0.977959	0.0815721	0.929507	1.8183
NEFL	0.475882	0.10554	0.0418503	0.0689826	0.00357866	3.45113	0.652119	0.560161	0.866972	1.64229	3.78263	0.905549	3.01159	4.5474	3.45558	0.0615076	0.370137	0.169725	0.017408	0.0471084	3.26944	1.6712	0.0984126	2.80701	2.39686	0.603051	4.18758	0.416526	2.85824	3.94122	1.9668	1.76326	3.10443	0.0182803	3.3685	0.777287	0.00663378	0	0.072537	0	0.624169	2.8391	0.0839559	3.46128	1.25667	0.0484689	0.0720938	4.30516	4.03063
C3orf67	1.29004	0.982926	0.6508	0.277132	0.242545	1.52899	0.547685	1.58943	1.00589	0.833084	0.821291	1.051	1.37611	1.2182	0.942234	0.241196	0.637708	0.190292	0.466395	0.76105	0.962126	0.471528	0.686614	0.416181	0.467678	1.14096	2.2159	0.776471	1.40394	1.34962	0.707885	0.728335	0.662447	1.01419	0.463824	1.19163	0.505808	0.507479	0.777126	1.18919	0.832085	0.43594	0.734586	1.44664	0.959506	0.607913	0.396952	0.65223	1.44453
GABRR1	0.0251127	0.449175	0.152243	0.1372	0.00409984	1.27083	0.8051	1.19776	1.30677	0.70271	0.239792	0.519379	0.405003	0.833616	0.68561	0.104152	2.20098	0.603838	2.02811	0.389232	0.218823	0.583706	0.00831176	0.00712637	1.63777	1.62056	0.751099	1.3391	0.381275	0.798058	1.10494	0.552477	0.949073	1.18653	0.925269	0.701361	0.566148	0.692939	0.694315	0.873353	0.665222	0.00940466	1.12192	1.80847	0.652626	0.713209	1.22932	0.0935056	0.324663
MIR2052HG	0.387561	0.804229	0.0312865	0.196505	0.0264444	0.160252	0.367872	0.243372	0.274844	0.056036	0.0258554	0.397842	0.482462	0.251205	0.198056	0.0232142	0.655759	0.136438	0.124882	0.163604	0.00712639	0.10809	0.362266	0.199208	0.147276	0.312168	0.225462	0.083542	0.22054	0.495707	0.234433	0.346666	0.148411	0.56679	0.176154	0.400681	0.302676	0.675128	0.138093	0.336945	0.0213848	0.0122148	0.736812	0.752524	0.321495	0.492807	0.176024	0.0669268	0.133174
CAGE1	0.38098	0.0134342	0.0207861	0.0569258	0.0731943	0.0623795	0.339357	0.065964	0.084609	0.227016	0.156676	0.547865	0.329376	0.101163	0.26046	0.264633	0.226575	0.0861785	0.0285001	0.369873	0.0804717	0.210842	0.216118	0.0748739	0.159923	0.037947	0.349474	0.343771	0.0370761	0.323038	0.0250569	0.520565	0.103948	0.143768	0.0755046	0.153471	0.373406	0.141663	0.17264	0.28414	0.415354	0.00506611	0.458616	0.169976	0.0726381	0.215916	0.889615	0.126545	0.137532
LINC00491	1.57211	1.82532	0.0296561	1.85245	0	1.09644	1.1896	1.08507	1.57402	0.838285	0.499784	1.06466	1.74968	1.77636	1.17846	0.386634	1.25238	0.888743	1.19211	0.739134	0.0661394	0.796634	0.600197	0	1.59131	1.37961	2.01959	1.09922	2.36569	1.68772	2.28133	0	1.88534	1.53831	2.01143	1.10011	1.15025	0.707367	0.561501	0.81683	0.528166	0.138404	1.86775	1.11314	1.10955	1.51013	1.38349	1.74109	1.10657
LINC00525	0.078392	1.42602	0.0456888	0.136387	0.272803	0.091277	0.134873	0.0490399	0.37997	0.158668	0.759578	0.0357025	0.0990657	0.322531	0.513432	0.482111	0.111612	0.145545	0.796807	0.208526	0.195794	2.47701	0.309023	0.287431	0.147372	0.0281408	0.119291	0.261661	0.157608	0.185726	0.351885	0.791485	0.261561	0.0440125	0.334507	0.398943	0.264872	0.781532	0.194763	0.146986	0.0769598	0.260128	0.101357	0.127516	0.188948	0.02963	0.200851	0.0276612	0.373717
CFHR3	0.178662	0.638932	0.16982	0.087356	0.383859	0.279553	0.16786	0.419438	0.623861	0.0518532	0.182184	0.37381	0.437513	0.536683	0.098712	0.516936	0.114086	0.187045	0.12807	0.211301	0.288242	0.302138	0.127692	0.330867	0.192756	0.6282	0.610149	0.0819182	0.661204	0.586575	0.615964	0.0396808	0.407909	0.956793	0.169923	0.98074	0.524848	0.104926	0.909281	0.153857	0.505588	0.426232	0.982581	0.439729	0.199328	0.342336	0.358541	0.150152	0.822572
ECT2	4.60331	5.78108	2.99538	4.29791	4.60671	4.46249	4.62216	5.2293	4.9463	4.37354	5.01103	4.65017	4.72924	3.53369	3.14793	3.93247	4.7463	3.30566	3.89183	4.3076	4.15234	4.3778	3.23383	2.89401	3.63235	4.23137	4.12003	4.58952	5.75297	4.63667	3.78039	3.50877	4.88124	4.83333	4.39707	4.32993	3.58635	3.05559	4.41867	4.55691	2.89215	5.08043	3.67193	4.61137	4.71822	5.20094	3.29603	2.47796	4.14494
TMEM117	2.80485	2.80697	1.3724	1.04367	1.22701	3.16675	1.65878	3.66359	2.85054	2.02789	3.67212	2.51716	2.45091	2.15727	2.09715	2.60335	2.62288	2.22375	1.89105	2.72315	3.15209	2.39935	2.3997	3.02995	2.74667	2.60602	1.86298	2.89742	2.85314	4.38866	2.42499	1.64445	3.20394	1.79099	1.24809	2.6893	1.61303	3.20181	4.21492	2.46115	1.42783	3.37182	3.70206	3.40574	3.41185	2.39415	2.63166	2.02689	1.43968
BOLL	0.0119021	0	0.60586	0.0663558	0.0115752	0.0331646	0.0413493	0.0293012	0.0608014	0.00827017	0.00629769	0.0159988	0.116841	0.0303183	0.0191323	0.0252544	0.0754599	0.00647647	0.0188118	0.0147169	0.109784	0.00451861	0.0156454	0.0267142	0	0.0084069	0.00736091	0.103982	0.0244972	0.0233342	0.0999183	0.0188367	0.0373289	0.0392411	0.0336009	0.0113182	0.0563933	0.124987	0.042671	0.0152229	0	0.0863892	0	0	0.0162441	0.0176559	0.00797054	0.00826263	0.0108082
TPD52L1	5.02629	2.64326	1.94183	2.96387	2.89989	3.67941	3.9075	6.59024	3.39585	3.64615	4.76724	5.1631	4.42689	3.41217	2.89114	3.36289	3.10526	2.39767	3.21412	4.52762	3.59795	3.13058	3.51695	3.15412	2.13569	5.39429	3.15183	2.51332	4.16848	4.55421	4.35754	4.04097	2.89186	2.55447	0.782833	3.73434	3.5715	1.44952	3.65175	1.94561	3.51734	2.85432	3.774	4.28128	3.17773	3.48141	3.85267	3.97361	3.12038
BBOX1-AS1	2.10832	2.8601	0.107946	1.67382	0.146045	2.27975	2.91536	2.36411	2.58545	1.48908	3.02789	2.56085	2.03188	3.24402	1.5832	2.69979	3.57811	1.2716	2.87878	2.00142	3.33365	1.80286	3.15967	0.155844	1.63692	2.77987	3.00448	3.1021	2.80228	2.80659	3.19537	4.4015	1.86387	3.36239	1.06278	2.77163	1.44274	2.00658	0.531047	2.41627	3.01995	2.79725	3.95162	3.02943	1.86307	2.08125	2.02755	2.47897	2.40992
CENPU	3.32637	4.35629	3.03739	4.65923	3.63603	2.64866	5.08067	2.27269	3.09011	2.33056	2.70148	2.43563	1.75422	2.63675	2.29035	3.89372	3.60358	3.00611	3.59253	3.10161	3.2857	2.96213	2.98397	2.25957	2.68106	4.31752	2.53595	4.43137	3.53171	3.71078	2.29376	2.43573	4.03625	2.61547	2.61165	2.03831	2.98276	2.39016	4.5135	3.1832	3.0435	2.35167	3.53088	3.26262	2.55764	4.71254	2.47305	1.81692	1.93905
CD200R1L	0.411159	0.182054	0.0213412	0.0197396	0.0269592	0.101113	0.0718467	0.116464	0.283433	0.343946	0.0436676	0.165881	0.125033	0.246687	0.228879	0.186286	0.0974103	0.102652	0.0147037	0.116402	0.0594609	0.0622208	0.0183001	0.0312269	0.0471315	0.301745	0.33743	0.0776007	0.180992	0.205041	0.49344	0.299592	0.334395	0.0307189	0.151014	0.232904	0.128742	0.22218	0.0568136	0.103683	0.018191	0.0103856	0.277831	0.143168	0.098558	0.0610821	0.224828	0.0192733	0.0902598
SUGCT	0.867342	1.06524	1.60741	0.347219	1.19584	0.728777	0.776614	1.71949	2.079	1.21995	1.34072	1.53157	1.09621	2.13033	1.87055	1.5592	1.24568	0.974345	1.03021	0.919082	2.39951	1.68517	1.71568	2.71931	2.06871	2.69405	1.82868	1.97147	0.374071	1.86142	0.929434	2.64793	1.20421	0.6596	2.47927	0.728367	1.29016	1.33455	1.17384	2.52536	2.74003	0.586509	1.70654	1.83583	0.727637	0.119401	0.589451	3.49251	1.9179
FBN2	0.635048	1.34127	0.0653618	0.2216	2.67977	4.34577	0.689883	4.24874	2.4422	0.745722	1.82402	0.0714243	4.85518	0.0569646	3.09566	0.192682	1.83033	0.432411	0.107008	0.0828531	5.24901	3.26701	0.0515706	0.445213	0.0770616	4.72569	4.63036	0.804993	2.81623	1.79855	1.04482	0.0341116	4.49948	0.280645	1.27059	2.02661	0.0344845	0.48353	0.164804	0.141427	0.424397	3.84208	0.795082	3.38255	3.74794	2.32665	4.75254	0.802535	2.66689
FEZF1-AS1	2.44765	2.00891	0.0165503	0.146213	0.0186072	1.49916	0.317283	3.3834	1.22193	0.170006	0.283064	1.8574	1.87323	1.46036	0.827366	3.14864	1.87214	0.0614323	0.037645	1.05525	1.61911	0.863076	0.527525	1.22894	0.0426387	2.81682	1.32323	0.414428	1.4388	2.25364	0.354545	0.0114122	2.4611	3.27266	0.0405115	2.0131	2.17149	0.139549	1.14249	0	0.0826266	2.18824	0.596014	1.74891	0.638324	1.55317	0.812783	0.0684525	0.62505
TINAG	0	0.0218299	0	0	0	0.0206297	0.0193543	0	0	0	0.0908896	0	0.00939124	0	0.0353481	0	0	0	0.0116797	0	0.0473816	0	0.0289352	0	0	0	0.0136468	0.0209349	0	0.510091	0	0.0518976	0	0	0	0.510332	0	0	0.0114497	0	0	0	0	0.0452194	0.0100821	0.17099	0	0.0153145	0.00670344
C9	0.0161255	0.123098	0.0124049	0.0341438	0.101472	0.00756677	0	0.0396143	0.141866	0.0551976	0.0170262	0.0216649	0.0272625	0.554099	0.0513398	0.203827	0.0684255	0.101995	0.169484	0.695171	0.0209523	0.0423562	0.357373	0.445043	0.0206727	0	0.106141	0.227476	0	0.425372	0.0780647	0.0380817	0.0127708	0.0616344	0.0325763	0.0229425	0.290553	0.0250876	0.0736394	0.119497	0.102359	0.0764552	0.226436	0.0199879	0	0	0.354029	0	0.05771
ALG1L	4.34757	5.72878	2.27475	2.57876	2.33063	3.94443	4.25745	4.91587	4.51181	3.5114	4.04267	5.09109	4.45957	4.09712	3.05721	4.53947	5.29382	2.6553	3.23188	3.81764	4.94666	3.95118	4.3017	1.70647	2.92629	5.15552	3.69798	4.69823	3.74608	4.5012	3.15101	3.51799	5.33532	5.13496	3.0543	5.32121	3.02216	0.351995	4.99177	4.54035	3.69696	4.79875	5.19908	4.53531	3.49701	2.11558	3.8657	2.5499	2.98064
DUXAP10	0.287609	1.40415	0.0828742	0.0767759	0.266506	0.106766	0.100346	0.86364	0.461876	0.0405193	0.109125	0.370018	0.0341397	0.0188521	0.276001	0.0414745	0.15167	0.250336	0.56255	0.192672	0.429998	0.239623	0.0526124	0.08511	0.17576	0.06134	0.143453	0.221143	0.0402376	0.390152	0.208454	0.09101	0.040415	0.348496	0.0675714	0.0518374	0.0308339	0.319866	0.233022	0.298584	0.0708611	0.228954	1.20999	0.191839	0	0	0.0817888	0.0203834	0.10785
GSDMC	4.02042	1.36052	2.32809	0.708682	3.04794	4.87865	1.6701	2.43377	2.35134	1.48368	3.38472	1.36318	2.60516	4.769	4.89607	4.15032	2.28319	3.06912	4.52736	3.07193	2.71194	3.05964	3.61375	3.10229	1.79399	1.98511	3.98559	1.99637	1.25969	2.99365	1.51574	3.1855	2.20568	3.86259	0.517855	2.6477	3.6609	1.75403	2.75801	0.591355	3.9047	3.82959	4.23356	1.23659	2.74681	1.36242	4.39318	3.90304	2.63295
ABCB6	3.31335	0.476504	0.865931	0.929941	0.835873	0.255552	2.2349	2.66868	1.36409	1.98821	2.08663	2.5455	2.2089	1.72757	0.750968	1.5074	1.25186	1.7427	0.776923	2.81431	1.69202	1.99023	2.40335	1.3921	0.408495	2.46303	1.27062	0.943272	2.50727	2.743	0.93969	1.96403	2.32701	1.52996	1.64192	2.27628	1.22039	2.17493	1.33388	1.35072	1.72841	2.07104	1.35513	3.3944	1.83811	2.00097	1.74523	1.40974	2.69213
LINC00648	0	0.189494	0.087881	0.0761369	0.298258	0	0.0137331	0.511173	1.00776	0.0323736	0	0.338124	0	0.0100437	0.610675	0	1.60088	1.03828	2.22247	0.0758268	0	0.333472	0.0307181	0.035049	1.16113	0.177252	0.216034	0.00744765	0.284304	0.118784	1.84325	0	0.0123863	0.0681543	1.05403	0.00745627	0.259055	3.02736	0.00811789	0	0	0.227144	1.69557	0.0821935	0.0213364	0	0	0.0216433	0.00948536
C17orf99	0.870529	0.607126	0.0328874	0.162682	0.0387717	0.153584	0.158171	0.764458	0.304651	0.27295	0.810997	1.22396	0.477378	0.206494	0.378358	0.667745	0.175929	0.117377	0.987454	0.142752	0.681804	0.342794	0.297617	0.200329	0.100216	1.53461	0.122942	0.712304	1.6595	0.450223	0.0525761	0.192621	0.807526	1.0604	0.58732	0.519758	0.308349	0.270332	0.629365	0.999405	0.055564	0.793519	0.329537	0.403636	0.473368	1.77309	0.143222	0.0816994	1.11262
TPRXL	0.736337	1.55719	0.0496908	0.150746	0.425469	1.7301	1.78635	1.83139	1.8154	1.11849	1.04928	1.45183	0.631929	0.167076	0.640285	1.51621	0.380982	0.48679	1.14983	3.10224	1.28723	0.507358	1.98322	0.930215	0.312755	2.47418	0.710634	1.57298	0.934696	0.604753	1.07809	1.89281	1.34316	1.99486	1.46315	0.782302	1.27244	1.48958	1.07709	0.261326	0.259338	0.50032	2.04263	1.86172	0.62713	0.225886	2.6275	0.354225	1.03291
SULT4A1	0.081629	1.74032	0.789929	0.994402	0.0897078	0.284369	0.0718713	0.670054	1.63601	0.216102	0.221574	0.0734638	0.485562	1.2692	0	0.210616	2.44024	1.22293	0.0263688	0.714787	0.0710889	0.66572	0.0753734	0.795311	1.55748	0.865009	0.1098	0.61939	0.410261	0.0487576	1.60621	2.12179	0.685121	0.191675	0.526046	1.69419	1.52797	1.19537	2.44889	0.425333	0.877949	1.06241	1.30741	1.37538	0.206434	0.0611031	1.38929	1.15508	0.010129
POU6F2	0.376519	0.801127	0.00890567	0.35991	0.00376406	0.502496	0.398614	0.943535	0.697542	0.676689	0.0630756	0.362547	0.467807	0.879231	0.260711	0.689549	1.41778	0.811546	0.530861	0.522482	0.748531	0.519423	0.378157	0.0356262	0.806163	0.598912	0.53396	0.48336	0.502361	0.496181	1.3277	0.781757	1.255	0.636364	0.881027	0.878969	0.51014	1.56665	1.01593	0.226857	0.748566	0.310516	1.21897	0.990598	0.735226	0.414069	1.40709	0.35547	0.539627
AADACP1	3.09043	1.30434	0.458001	0.0333945	0.991744	0.593641	1.18458	1.54551	2.78193	0.642094	0.876393	1.50686	1.60526	0.900262	0.0927722	1.64168	1.34683	0.0507664	0.0971395	1.49886	1.63354	0.405583	2.52135	1.99448	0.0695536	0.246209	1.17777	1.62396	2.36992	0.626224	0	1.78467	1.53153	1.97325	0.303887	1.78783	0.342256	0	0.68341	0.994329	0.40439	0.28085	2.44911	0.714696	2.30332	0.753708	1.58281	0.0163968	2.20212
CHODL	2.38846	1.37485	1.20532	1.04173	0.120222	1.40362	2.6613	3.88737	1.46556	1.90828	2.81265	2.41693	1.60119	0.105148	0.735826	1.72635	0.893224	0.528728	1.54593	1.83257	3.38146	2.08704	0.413273	0.141204	0.802043	1.84295	0.650286	1.54581	3.20204	4.40099	1.04796	2.10737	1.3031	0.0588617	0.99219	3.21397	1.15419	2.29264	0.479395	2.39043	0.908352	1.3728	2.61122	2.22593	2.16629	2.69852	1.56807	1.8005	1.70705
LINC01192	0	0.0153134	0.0118913	0.0109962	0.0200116	0	0	0.102154	0	0	0	0.00695686	0	0	0	0	0.0868787	0.00841648	0	0.00958616	0	0.00587335	0	0	0.0839832	0	0.0656602	0	0.01067	0.0817638	1.22583	0	0	0	0.049659	0.160643	0	0	0	0	0	0	0.0241059	0.0567402	0	0	0.0103565	0	0.00937482
MUC7	0	0	0	0	0	0.0316561	0	0	3.55416	4.17163	0	0.00765368	0	0	0	0	0	0.00925903	0	0	5.73868	0	0	0	0	0	0	0.00809796	0	1.30111	0.0105366	0	0.0134658	0.00945654	0	0	0.0204292	0	0	0.0431475	0.022204	0	0	0	0.0308375	0	0	0	0
TEX11	0.0141262	0.221188	2.6465	0.0495497	0.0805345	0.013222	0.119474	0.158027	0.0665301	0.113622	0.221914	0.0684173	0.191497	0.0967606	0.0994364	0.068935	0.0403267	0.0455333	0.156165	0.0432693	0.129499	0.223634	0.0549916	0.0779225	0.105417	0.187556	0.0174253	0.252845	0.157386	0.0814787	0.0346902	0.0112166	0.0111858	0.184549	0.80545	0.053	0.0989887	0.0860006	0.0993787	0.0359037	0.0546679	0.0921636	0.341139	0.0965394	0.0694474	0.051809	0.00946233	0.0195516	0.0834459
NRXN1	0.015728	0.0181606	0.01711	0.0568931	0.00766856	0.0147218	0.00231085	0.223323	0.0568083	0.0731084	0.0343841	0.024624	0.00335105	0.0217946	0.0084699	0.0314918	0.259864	0.00713974	0.0110927	0.00163017	0.138366	0.0644128	0.018955	0.039589	0.0843478	0.00185822	0.00325128	0.0743888	0.00905249	0.018044	0	0	0.0532144	0.0782555	0.845238	0.0804102	0.00158449	0.0761091	0.0718589	0.207137	0.0407972	0.188391	0.147475	0.151018	0.0308896	2.34985	0.00176156	0.00182626	0.093408
HECW1	0.112041	0.0663368	0.0706393	0.0217388	0.130531	0.0457584	0.153861	0.141366	0.282683	0.318746	0.361466	0.0304279	0.0667657	0.150045	0.0883529	0.0988029	0.174149	0.133235	0.041033	0.194148	0.181366	0.46138	0.0661147	0.206716	0.0854183	0.127184	0.148648	0.18455	0.0372937	0.404629	0.437171	0.326936	0.0348146	0.0412255	0.430239	0.0807721	0.0486381	0.254293	0.0709557	0.230643	0.174995	0.0501692	0.212263	0.194659	0.239673	0.0126775	0.0384407	0.142412	0.905507
CNTNAP2	3.70943	0.784761	0.00843549	1.60533	0.0422094	3.88696	0.970184	4.08064	1.4472	2.46118	3.90239	0.294009	2.2053	1.75093	1.71931	0.571396	0.355314	0.813778	0.280302	0.984575	4.11426	1.94699	2.39828	0.957503	1.99776	1.75798	0.355036	2.37966	0.985792	3.61539	0.353343	0.980812	2.51947	0.0242305	2.0204	3.4892	0.0571415	0.0572781	2.62081	1.67148	1.02189	4.00363	1.24132	3.96099	2.20298	1.75617	0.00587945	0.103115	0.691773
SYCP1	0	0	0	0.00781345	0	0	0	0.00681432	0.0305388	0	0	0.00986563	0.00467295	0.00705275	0	0.0233256	0	0.211395	0	0	0.0237324	0.00833039	0.0144468	0	0	0.0231599	0.0135591	0	0	0.0268887	0	0.0931775	0.00869982	0.0947323	0	0	0	0.0917077	0	0	0	0.0203985	0	0	0	0	0	0	0
MCM2	4.60792	5.36041	4.43239	4.90262	5.07571	4.01186	5.79238	4.97658	4.80553	4.6619	5.19706	5.68651	5.03408	4.25889	4.45416	4.47428	6.16199	4.55788	3.9523	4.60977	5.01053	5.14647	3.8506	3.33713	5.4695	5.12031	5.26628	4.87689	3.99281	4.56081	3.81505	4.43975	5.58901	5.84408	5.89522	5.11461	4.31154	4.31524	5.24101	4.88377	4.1633	4.77874	4.99817	4.19538	3.01188	4.18256	4.06198	2.96569	4.11998
UGT2A1	0.0288094	0.18885	0.00557823	0.0205203	0.00940148	0.00679098	0.0746355	0.0355931	0.143792	0.28328	0.0748589	0.0449899	0.00616018	0.0185304	0.0686789	0.791552	0.0310988	0.0389793	0	0.0443317	0.103503	0.233484	0.179815	0	0	0.0798631	0	0.0205778	0.0199135	0.381522	0.00896855	0.0454409	0.0783955	0.0240128	0	0.013767	0.101372	0.201029	0.261094	0	0	0.0161664	0.495809	0	0.0131976	0.0107728	0	0	0.0813108
OR56B4	0	0.296506	0.0776564	0	0	0.0193045	0.0359964	0.192354	0.0807161	0.0285429	0.0432195	0.0368041	0.102054	0.0777366	0	0.113483	0.142329	0.0875333	0.105717	0	0.0703421	0.0615863	0.130593	0	0.198974	0.338072	0.457709	0.0768135	0.0834132	0.117708	0.192105	0.0325794	0	0.110849	0.129085	0	0.119814	0.0634128	0.123576	0.0522331	0.0269205	0.201808	0.275196	0.083468	0.177837	0	0	0	0.0125146
EPHA6	0.0668849	0.0298285	1.11544	0.00539234	0.0292881	0.0420853	0.33237	0.0047023	0.127933	0.0105191	0.0199466	1.55347	0.00644058	0	0.0122064	0.00539493	0.313862	0.0646314	0.0159797	0	0.0358512	0.0947543	0.0149402	0.0128137	0.0321948	0.0475061	0.00936342	0.0107949	0.0815182	0.0259661	0.846992	0.0120173	0.392655	0.803928	0.929134	0.176748	0.0181864	0.0235489	0.120806	0.0193499	0	0.0252758	0.227037	0.169077	0.0137968	0	0.0202059	0	0.333475
CES5A	0.0148587	0.0292894	0	0	0.0048331	0	0	0.0544472	0.0118903	0.0307641	0.0156891	0	0.0188872	0	0.0931984	0.0210707	0	0	0.184828	0	0	0.0168681	0	0.0250528	0	0.821191	0	0.0280915	0.0102552	0.0146244	0.0183531	0.0806344	0.15659	0	0.0300306	0.00708251	0.00895584	0.0116075	1.00157	0.947052	0	0.0165928	0.00776575	0.00616602	0.0135461	0.0110575	0	0	0.00451214
CDH8	0.284755	0.25321	0.00407046	0.0734617	0.124066	0.257007	0.00310033	1.14993	0.512259	0.0146532	0.20997	0.124603	0.286285	1.69001	1.47913	0.19044	0.614944	0.0435214	0.125168	0.259716	0.485356	0.160801	0.0023259	0.441641	0.220018	0.45978	0.919668	0.178297	0.329748	0.205664	0.123591	0.00280298	0.656272	0.171831	0.212141	0.125529	0.170374	0.879591	0.483908	0.100582	0.132549	0.130891	0.705015	0.2056	0.370354	0	0.528767	0.498832	0.845384
IGSF11	0.991689	1.64742	0.139383	0.299617	0.420051	0.986936	0.932795	2.34934	1.62471	0.835659	1.49932	1.35872	1.74784	1.2975	0.687968	0.200556	2.99162	0.17936	0.228519	1.6083	0.601196	0.856138	1.01144	0.106181	1.05117	1.18911	0.975079	1.40557	1.91863	1.65333	1.01544	0.526462	2.20136	1.692	0.583017	1.9358	1.0447	1.17128	1.8242	1.11796	0.727269	0.57212	2.1918	1.06521	1.76292	0.0429125	1.34197	0.0400733	1.1671
WTAPP1	0.136949	0.174059	0.200607	0.0890243	0.141809	0.0911549	0.0495615	0.303693	0.167852	0.142291	0.256491	0.141127	0.311305	0.830751	0.729382	0.836248	0.220269	0.716846	0.0594529	0.198993	0.224636	0.109944	0.60811	0.60094	0.200591	0.189667	0.167325	0.0731483	0.21141	0.371836	0.0693696	0.315985	0.0336957	0.221222	0.12303	0.124248	1.32043	0.0222475	0.411331	0.140132	0.378115	0.103232	0.320997	0.130609	0.0640135	0.189807	0.0839748	0.351814	0.120854
EWSAT1	0.222755	0.960774	0	0.616929	0.00433108	0.0492356	0.0116945	0.0648096	0.0369635	1.09717	0.560854	0.0119592	0.0773778	0.00855115	0.0214053	0.178642	0.00960575	0.171134	0.967325	0.0246325	0.0624876	0.563344	0.077159	0.0298786	0.0506477	0.335424	0.016432	0.64906	0.539832	0.269502	0.0488116	0.571047	0.977116	0.0581979	0.553236	1.69007	0.108504	0.0104043	0.0409769	0.0505106	0.00872736	0.457453	0.126816	0.043625	0.525587	0.00991117	0.0613225	0.0275692	1.2013
ADH7	6.81683	2.65692	0.0408187	0.286659	0.137923	5.5966	6.89064	5.58806	4.94747	5.53168	7.21693	5.88779	7.03782	4.94878	0.012353	5.62458	1.72169	0	0.0479806	4.97303	7.35714	5.38854	5.34709	2.37725	0.156001	3.72297	2.15054	4.56014	5.67907	6.52733	1.83472	4.89435	6.12506	4.16448	0.148501	5.46164	2.79584	0.0356	2.28803	2.68682	0.0973592	7.80646	3.39431	6.94404	5.34963	8.02723	0.329914	2.33346	6.02237
ABCA9-AS1	0.222064	0.480875	0.0122438	0.0225563	0.119423	0.265932	0.159382	0.433299	0.134286	0.075724	0.144635	0.255958	0.426111	0.0503966	0.0875579	0.171363	0.443114	0.247049	0	0.310668	0.138903	0.0995159	0	0.0179415	0.693539	0.180205	0.261409	0.86112	1.2942	0.0541005	0.278156	0.307532	0.471047	0.0693339	0.0448205	0.276128	0.348891	0.0247631	0.156857	0.191625	0.0814145	0.0867538	0.379342	0.580804	0.283732	1.04513	0.263406	0.022024	0.923134
FAM86JP	1.7186	2.74975	1.98331	0.910036	1.10595	1.41657	2.11357	2.67198	2.17161	1.60735	1.65795	2.5846	1.56611	1.77843	1.87306	2.16069	2.54514	1.71115	2.0459	1.79794	1.98727	1.57751	1.94848	1.09009	1.40055	2.19423	1.83236	2.01163	1.77893	1.64995	2.39236	2.1323	2.54426	3.31762	1.84173	2.44806	1.68603	1.47914	2.01442	1.63581	1.62101	1.95929	2.51334	1.63613	1.09754	0.574642	1.37021	0.893896	0.991394
LINC00461	0.00773002	0.0303879	0.0294707	0.1711	0.0149959	0.00362166	0.092204	0.0237988	0.0367051	0.0107177	0.0323791	0.00347361	0	0.00495903	0.018615	0	0.117861	0.0658287	0	0.0143184	0.013388	0.0405162	0	0	0.00331356	0.0108948	0.0700602	0.0109987	0.151938	0.067068	0.171508	0	0	0.0042933	0.0796484	0.0219394	0.00465458	0.279531	0	0	0	0.00576219	0.220646	0.00320315	0	0.00574888	0	0	0.0529566
SLC44A5	0.625156	2.06592	0.263344	0.892541	2.25774	0.792184	2.35918	0.558543	3.13927	0.422074	1.84692	2.38599	1.05134	1.19698	2.16051	2.8718	3.06438	1.53557	2.84215	1.93682	1.49725	1.45879	0.639639	0.240217	1.12647	1.17116	1.605	1.01802	0.689951	1.38786	2.88589	1.05786	1.8477	2.45523	1.24064	0.208143	0.573159	3.59625	2.54966	1.61508	1.23708	0.27484	3.04496	1.34003	0.677897	1.1021	3.11368	2.11548	1.24019
GINS1	2.93303	3.86561	3.23417	2.6709	2.75059	2.83858	3.76849	3.54511	3.01354	2.55661	3.43645	4.23455	3.61764	3.44803	3.09462	2.82091	3.6765	2.86473	2.34054	3.03395	2.93017	2.88765	2.77814	1.85469	3.98475	3.56457	2.93943	3.69462	2.97458	3.8036	1.99994	3.07909	3.3085	3.4536	3.33462	3.55295	2.92441	3.01574	3.14722	2.68228	2.37343	2.8194	3.79189	3.30138	1.964	3.1423	1.75827	1.61782	1.72974
WASF1	4.41818	1.93432	3.10795	2.83202	2.86709	3.45959	3.38853	4.00854	3.02383	3.9512	4.33655	3.0992	4.22531	2.16002	2.55532	2.84718	3.89593	1.60889	0.77339	1.9481	4.08719	3.2814	2.40567	2.51675	1.65394	3.14729	1.78406	3.20139	4.76259	3.14331	3.05822	3.04679	3.72791	2.9606	2.02131	4.82734	2.18575	1.89038	4.23127	1.95094	1.68544	3.60098	2.81271	4.39863	4.04214	3.39198	3.37997	2.12598	3.05943
SYT1	0.955919	1.01579	1.06819	1.03193	0.214864	1.54423	0.730163	1.83642	1.1813	0.231046	0.632509	1.21276	0.752606	0.164944	0.914444	1.20575	0.627084	1.12182	0.897765	1.3191	1.39799	1.29429	0.316588	0.271927	1.5735	1.54448	0.962973	1.06945	0.714197	1.69349	1.36158	0.803628	1.74828	0.496567	0.915519	1.32923	1.49508	0.218358	1.30921	1.46432	0.394049	2.33689	1.76975	1.28008	1.2196	1.01516	1.7632	0.641116	1.35406
KCNMB2-AS1	3.38063	4.51344	0.46914	2.90803	0.531137	2.62019	2.48427	3.64267	3.00166	1.84799	3.26425	2.90432	2.36543	2.77522	1.40257	2.97918	3.51066	1.29211	2.39155	1.7515	2.01971	2.84844	1.74391	0.151382	2.04079	1.47055	2.0144	3.26392	3.49474	2.68575	1.86075	2.63152	2.90417	2.81541	1.77865	2.82747	2.34548	0.14684	3.3775	3.60609	1.71545	3.09418	2.9617	3.81578	2.83408	2.99427	2.36324	0.964953	2.34074
OR7E5P	0	0.301811	0	0.617193	0	0	0	0.120714	0.0531915	0	0.0698699	0.0300973	0.797077	0	0	0.0473764	0.525954	0.0363513	0	0	0.908006	0.0504418	0	0	0	0.0925996	0	0	0	0.1276	0	0	0.052645	0.241768	0.180961	0	0	0.882208	0.0346685	0	0	0	0.287412	0.0277737	0.0305566	0	0	0	0
FSTL4	1.28878	1.42138	1.31234	1.10498	0.472983	1.93296	1.59997	1.45658	0.878691	2.95758	1.4027	1.2914	1.06272	2.09015	0.89934	2.26544	2.77084	0.696574	0.0624284	0.639537	2.06342	1.25112	0.103742	0.558057	1.10223	2.45488	0.709883	0.766929	1.42594	0.952769	0.887334	1.26932	3.08888	1.05612	3.31802	0.159728	1.40775	1.32134	2.40991	0.527574	1.2148	1.54729	1.37702	3.33208	1.48536	1.92756	0.800056	2.21217	1.25555
CHRNB4	0.905526	0.260732	0.541803	0.407805	0.0490326	0.317735	1.22976	0.255792	0.531018	0.294748	0.861311	1.08923	1.83173	0.0838073	0.255027	1.50235	0.241759	0.334187	0.361932	0.527465	1.23298	0.151943	0.254619	0.0321826	1.16602	0.237197	0.645146	0.656312	1.0207	0.707579	0.70907	2.34238	0.801977	0.107895	1.93143	0.821174	0.697308	1.56098	1.21514	0.227384	0.210363	1.14832	1.01062	0.713539	1.32737	0.380948	0.0993974	0.216312	0.753407
MAP7D2	2.01147	0.0841537	1.46093	2.83098	0.141683	1.7927	0.919331	1.41222	2.50688	0.164766	1.53474	3.19576	3.55753	1.19062	0.0938067	1.11328	2.62267	2.56548	0.880199	2.49669	1.54943	1.09921	0.262473	0.377691	2.48383	3.27324	0.28131	2.66962	2.56564	0.613191	0.0596073	1.90601	1.56593	3.04131	2.21049	0.25214	0.716208	1.07453	1.86113	0.244169	1.81308	0.176152	1.13838	1.56712	1.64814	0.838881	0.105727	0.13731	1.76609
AGMO	0.0264377	1.53409	0.222746	0.0374106	0.799378	0.0124293	0.176098	0.0326693	0.198926	0.115598	0.0887977	0.344485	0.0224661	0.0749701	0.921518	0.817378	2.02511	0.418453	0.23365	0.0487042	0.184469	0.144111	0.806138	0.108669	0.0170288	0.6243	0.362324	0.0559128	0.0977348	1.05548	1.0451	0.0105436	0.206157	0.532357	0.432377	0	0.0551053	0.582919	0.270039	0.660103	0.225736	0.173044	1.62644	0.0327422	0.0360167	0	0.415695	0.0544571	0.0200435
LINC01572	0.866828	0.500647	0.0899751	0.296361	0.0855449	0.117571	0.250801	0.266799	0.303759	0.12702	0.266322	0.466864	0.410062	0.537878	0.467225	0.487225	0.597195	0.170058	0.305586	0.376351	0.203403	0.0779362	0.356382	0.125054	0.215773	0.198782	0.525694	0.145427	0.692123	0.290728	0.0963384	0.22853	0.442438	0.61399	0.180542	0.380675	0.719466	0.74449	0.25716	0.135294	0.190992	0.59909	0.412682	0.258668	0.156384	0.240699	0.412975	0.152261	0.144832
CELF5	0.092308	0.00784733	0.469841	0.0279372	0.00257261	0.0330666	0.0138738	0.140493	0.0499283	0.126587	0.0331761	0.199423	0.269743	0.0302286	0.0253784	0.0112452	0.0339254	0.0878717	0.143634	0.024373	0.047459	0.0531547	0.100942	0.00447347	0.375114	0.251375	0.0434841	0.0409053	0.213325	0.0537126	0.359059	0.226926	0.0675174	0.0218672	0.105777	0.150475	0.323901	0.018477	0.00410643	0.107763	0.148033	0.0636665	0.0287032	0.306751	0.0251156	0.0578618	0.0315278	0.0272791	0.00719296
RNFT2	0.430497	0.480329	0.889439	2.11441	0.409435	0.487376	0.359138	0.417491	0.882895	0.399836	0.416658	0.558393	0.617021	0.274691	1.60183	0.423878	0.408987	1.0276	1.74734	2.21675	0.588376	0.835262	0.447233	0.419452	0.831146	2.03895	1.80499	0.825428	0.89781	0.844049	0.964707	1.01585	1.02822	0.431775	1.02041	0.99753	0.981826	1.19957	0.597901	0.57633	0.514138	0.987469	2.4816	0.326373	0.856573	0.407962	0.352736	0.117807	0.150363
MMP1	4.77259	4.89173	3.28459	1.54267	6.83573	4.15335	6.51369	4.58363	7.12504	7.04563	7.2128	2.9828	7.94284	6.79701	9.20387	5.04089	3.25721	5.20348	4.30076	7.25653	6.54867	4.47413	8.35214	7.48421	8.27208	7.18793	6.28247	5.98456	2.63715	6.59684	4.14223	6.64933	0.770535	5.8349	5.25727	4.91908	9.02231	0.558736	6.98801	9.52907	11.349	4.42209	6.99983	5.62583	2.39231	5.76307	4.8424	8.77832	5.47831
FSTL5	0.00890861	0.110714	0.399268	0	1.99332	0.560967	0	0.142157	0.28729	0.00618818	0.113403	0.0356433	0.00378665	0.00571597	0.238387	0.012644	0.00642168	0.450687	0.0187548	0.0219528	0.0192552	0.0101162	0.0117142	0.0150418	0.0889916	0	0.0109938	0.448579	0.0244231	0.0347562	1.56046	0	0	0.0391231	0	0.0168928	1.64152	0.0069562	0.0765739	0	0.0573035	0.121238	1.666	0.0256506	0.0242246	0	0	0.00618253	0.0107754
WDR72	2.96109	2.85599	0.0106827	2.27233	1.33424	3.00305	2.49693	2.80131	3.50562	2.65861	3.73707	2.41467	2.01283	3.45022	2.8749	3.50767	2.85039	1.11249	3.26076	2.90579	3.22859	2.5481	1.26645	2.80276	1.94061	1.63826	2.38986	2.1968	2.80888	4.0686	1.9285	2.59233	3.63036	2.34379	2.59179	3.42293	2.82031	1.4167	3.1454	2.69047	2.70894	3.36118	4.34142	3.35192	2.92514	3.66792	3.43294	2.32275	2.93972
[truncated: 443 more columns]
