# Supplementary material for: Pan cancer characterization of genes whose expression has been associated with LINE-1 antisense promoter activity
Source: Mob DNA. 2023 Sep 18;14:13. doi: 10.1186/s13100-023-00300-x (PMC10506190; doi:10.1186/s13100-023-00300-x)
Supplement: Supplementary file 6 — Additional file 6. Table S3. The L1 ASP-associated genes were involved in various cancer progression-related pathways. [file 13100_2023_300_MOESM6_ESM.xlsx]

## Sheet: Table S3
Table S3. The L1 ASP-associated genes were involved in various cancer progression-related pathways.
LUSC-DEGs		GOKEGG										GSEA
gene name	log2FoldChange	ONTOLOGY	ID	Description	GeneRatio	BgRatio	pvalue	p.adjust	qvalue	geneID	Counts	ID	Description	setSize	enrichmentScore	NES	pvalue	p.adjust	qvalues	rank	leading_edge	core_enrichment
HECW1	2.34591	BP	GO:0043087	regulation of GTPase activity	33/519	479/18670	1.75745e-06	0.00757462	0.0071371	CHN1/DVL2/ECT2/GSK3B/IPO5/NF1/PAFAH1B1/PLXNA1/PTK2/RASGRF1/RDX/XCL1/VAV1/NRP1/RGS6/GIT2/SRGAP3/RABGAP1L/ARHGAP25/TBC1D8/RASA3/PLCB1/ACAP2/RAB3GAP2/TBC1D19/DOCK10/ARHGAP15/FGD3/TBCK/TAGAP/RGPD1/RGPD2/KLRC4-KLRK1	33	REACTOME_NEUROTRANSMITTER_RECEPTORS_AND_POSTSYNAPTIC_SIGNAL_TRANSMISSION	REACTOME_NEUROTRANSMITTER_RECEPTORS_AND_POSTSYNAPTIC_SIGNAL_TRANSMISSION	15	0.716697	1.7951	0.00274348	0.133521	0.126692	33	tags=40%, list=5%, signal=39%	GNGT1/GABRA3/GABRG2/GABRR1/NEFL/CHRNB4
DVL2	0.798268	BP	GO:0050808	synapse organization	28/519	408/18670	1.15198e-05	0.0248253	0.0233913	ACTN1/RHOA/CACNB1/CDH8/COL4A5/EPHB1/GABRG2/GPM6A/TNC/IL10RA/LMX1A/NEFL/PAFAH1B1/PTK2/RYK/THBS2/UBE3A/UTRN/VCP/NRP1/WASF1/NRXN1/NOS1AP/SEMA3E/UNC13B/SHANK2/DNM3/DOCK10	28	REACTOME_TRANSMISSION_ACROSS_CHEMICAL_SYNAPSES	REACTOME_TRANSMISSION_ACROSS_CHEMICAL_SYNAPSES	19	0.650774	1.72139	0.00534759	0.133521	0.126692	33	tags=32%, list=5%, signal=31%	GNGT1/GABRA3/GABRG2/GABRR1/NEFL/CHRNB4
FARP2	0.344298	BP	GO:0018279	protein N-linked glycosylation via asparagine	7/519	33/18670	2.8088e-05	0.029764	0.0280448	FUT8/STT3A/RPN1/VCP/TUSC3/UGGT1/ALG8	7	WP_FOCAL_ADHESIONPI3KAKTMTORSIGNALING_PATHWAY	WP_FOCAL_ADHESIONPI3KAKTMTORSIGNALING_PATHWAY	13	0.707324	1.72528	0.00564175	0.133521	0.126692	36	tags=31%, list=6%, signal=30%	GNGT1/PPP2R2C/COL11A1/SPP1
PAFAH1B1	-0.469331	BP	GO:0016601	Rac protein signal transduction	7/519	34/18670	3.4529e-05	0.029764	0.0280448	NF1/RASGRF1/WASF1/ELMO1/FARP2/NCKAP1/NISCH	7	REACTOME_EXTRACELLULAR_MATRIX_ORGANIZATION	REACTOME_EXTRACELLULAR_MATRIX_ORGANIZATION	12	0.701998	1.67526	0.011544	0.165839	0.157357	120	tags=67%, list=19%, signal=55%	MMP1/COL11A1/FBN2/SPP1/ADAM12/NRXN1/TNC/COL4A5
CAMK1G	-0.5445	BP	GO:0018196	peptidyl-asparagine modification	7/519	34/18670	3.4529e-05	0.029764	0.0280448	FUT8/STT3A/RPN1/VCP/TUSC3/UGGT1/ALG8	7	WP_PI3KAKT_SIGNALING_PATHWAY	WP_PI3KAKT_SIGNALING_PATHWAY	11	0.696747	1.64108	0.0116788	0.165839	0.157357	120	tags=55%, list=19%, signal=45%	GNGT1/PPP2R2C/SPP1/TNC/THBS2/COL4A5
CYTH3	-0.789045	BP	GO:0034332	adherens junction organization	14/519	142/18670	4.27297e-05	0.0306942	0.0289213	ACTN1/ADD1/RHOA/CDH5/CDH8/CTNNA1/PTK2/RDX/NUMB/NRP1/PPM1F/MACF1/WDPCP/EPB41L5	14
SPAG9	-0.502446	BP	GO:0043547	positive regulation of GTPase activity	26/519	405/18670	7.22309e-05	0.0419529	0.0395297	CHN1/DVL2/ECT2/GSK3B/NF1/RASGRF1/XCL1/VAV1/NRP1/RGS6/GIT2/SRGAP3/RABGAP1L/ARHGAP25/TBC1D8/RASA3/PLCB1/ACAP2/RAB3GAP2/TBC1D19/DOCK10/ARHGAP15/TBCK/TAGAP/RGPD1/RGPD2	26
CRY1	-0.750479	BP	GO:0140056	organelle localization by membrane tethering	15/519	169/18670	7.78709e-05	0.0419529	0.0395297	CSNK1E/PAFAH1B1/STXBP3/SYT1/ALMS1/IQCB1/UNC13B/CEP152/EXOC6B/STX12/HAUS6/MKS1/TCTN1/HAUS1/NPHP4	15
RANBP9	0.300532	BP	GO:1903391	regulation of adherens junction organization	9/519	67/18670	9.43079e-05	0.045163	0.0425544	ADD1/RHOA/PTK2/RDX/NRP1/PPM1F/MACF1/WDPCP/EPB41L5	9
METTL13	0.52936	BP	GO:0032535	regulation of cellular component size	24/519	370/18670	0.000116022	0.0500054	0.0471171	ADD1/RHOA/GSK3B/NCK1/NEFL/PAFAH1B1/PRKCE/RAB5A/RDX/RYK/SPP1/VAV1/NRP1/WASF1/SEMA3E/AKT3/ACTR3/NCKAP1/CIT/FSTL4/MACF1/TMOD3/TMEM123/WHAMMP3	24
CD9	0.955321	BP	GO:0022406	membrane docking	15/519	178/18670	0.000139587	0.0546926	0.0515336	CSNK1E/PAFAH1B1/STXBP3/SYT1/ALMS1/IQCB1/UNC13B/CEP152/EXOC6B/STX12/HAUS6/MKS1/TCTN1/HAUS1/NPHP4	15
NCAPD2	2.10596	BP	GO:0010975	regulation of neuron projection development	29/519	499/18670	0.000161976	0.0581764	0.0548161	RHOA/CHN1/CNTN1/DVL2/GSK3B/MOV10/NCK1/NEFL/PAFAH1B1/PLXNA1/PTK2/RYK/SPP1/SYT1/UBE3A/STK24/NRP1/SEMA3E/SHANK2/HECW1/FSTL4/MACF1/DNM3/ITSN2/ULK4/EFHC2/CSMD3/CHODL/NEGR1	29
NISCH	-0.751574	BP	GO:0021537	telencephalon development	18/519	251/18670	0.000243751	0.0753107	0.0709608	RHOA/BCL2A1/DNAH5/GSK3B/HIF1A/LMX1A/NEFL/NF1/PAFAH1B1/RYK/NR4A3/NUMB/NRP1/PLCB1/SUN1/CNTNAP2/SECISBP2/TCTN1	18
IDS	-0.56249	BP	GO:0006563	L-serine metabolic process	4/519	12/18670	0.000244629	0.0753107	0.0709608	SHMT1/SERINC3/SDS/PHGDH	4
CD4	-1.54851	BP	GO:0097711	ciliary basal body-plasma membrane docking	10/519	95/18670	0.000307855	0.0884569	0.0833476	CSNK1E/PAFAH1B1/ALMS1/IQCB1/CEP152/HAUS6/MKS1/TCTN1/HAUS1/NPHP4	10
MKS1	0.636248	BP	GO:0048010	vascular endothelial growth factor receptor signaling pathway	10/519	96/18670	0.000335275	0.0903148	0.0850982	RHOA/HIF1A/NCK1/PRKCB/PTK2/PTPN1/VAV1/NRP1/ELMO1/NCKAP1	10
RNF216	0.319113	BP	GO:0021987	cerebral cortex development	11/519	116/18670	0.000390409	0.09271	0.087355	RHOA/BCL2A1/GSK3B/HIF1A/NEFL/NF1/PAFAH1B1/NRP1/PLCB1/SUN1/CNTNAP2	11
GABRA3	7.34709	BP	GO:0051235	maintenance of location	21/519	330/18670	0.000393447	0.09271	0.087355	ATP7B/CAMK2D/CD4/CRY1/FBN2/ITPR2/PAFAH1B1/PLCG2/PRKCE/XCL1/SKP1/UVRAG/TRPA1/ATG5/FAF1/RASA3/PLCB1/SYNE1/SUN1/ACVR1C/IGSF11	21
LTF	0.960545	BP	GO:0009071	serine family amino acid catabolic process	4/519	14/18670	0.000473263	0.09271	0.087355	DAO/SHMT1/SDS/CSAD	4
DDX11	1.98931	BP	GO:0070672	response to interleukin-15	4/519	14/18670	0.000473263	0.09271	0.087355	CD4/ACSL4/JAK1/PLCB1	4
MAMLD1	-0.566419	BP	GO:0001952	regulation of cell-matrix adhesion	11/519	119/18670	0.000486059	0.09271	0.087355	RHOA/GSK3B/NF1/PTK2/UTRN/NRP1/PPM1F/SEMA3E/MACF1/WDPCP/EPB41L5	11
CNTN1	1.42774	BP	GO:0007162	negative regulation of cell adhesion	19/519	289/18670	0.000493677	0.09271	0.087355	RHOA/CD9/TNC/IL1RN/MBP/NF1/PLXNA1/PRKAR1A/PTK2/RDX/XCL1/SOCS6/PPM1F/SEMA3E/GLMN/PTPN22/IL20RB/EPB41L5/ZC3H8	19
CPS1	1.43008	BP	GO:0008361	regulation of cell size	14/519	179/18670	0.00049474	0.09271	0.087355	ADD1/RHOA/GSK3B/PAFAH1B1/RDX/RYK/SPP1/VAV1/NRP1/SEMA3E/AKT3/FSTL4/MACF1/TMEM123	14
RNF10	-0.18845	BP	GO:0051056	regulation of small GTPase mediated signal transduction	21/519	338/18670	0.000538671	0.0953224	0.0898165	RHOA/CHN1/ECT2/NF1/RASGRF1/RDX/VAV1/NRP1/CYTH3/FARP2/SRGAP3/ARHGAP25/AKAP13/RASA3/ARHGEF9/KANK2/ITSN2/ARHGAP15/KCTD10/FGD3/TAGAP	21
DERA	0.769546	BP	GO:0022408	negative regulation of cell-cell adhesion	14/519	181/18670	0.000552914	0.0953224	0.0898165	CD9/IL1RN/MBP/PRKAR1A/PTK2/RDX/XCL1/SOCS6/PPM1F/GLMN/PTPN22/IL20RB/EPB41L5/ZC3H8	14
UBR2	-0.371811	MF	GO:0017016	Ras GTPase binding	29/512	429/17697	2.22087e-05	0.0153687	0.0142867	DIAPH2/DVL2/ECT2/KPNB1/IPO5/RASGRF1/VAV1/WASF1/RPH3AL/FARP2/SRGAP3/RABGAP1L/RANBP9/DENND4A/UNC13B/NCKAP1/TBC1D8/AKAP13/DENND3/ARHGEF9/ACAP2/RAB3GAP2/ITSN2/KCTD10/FGD3/TBCK/WHAMMP3/RGPD1/RGPD2	29
FUT8	0.789136	MF	GO:0031267	small GTPase binding	29/512	443/17697	3.99188e-05	0.0153687	0.0142867	DIAPH2/DVL2/ECT2/KPNB1/IPO5/RASGRF1/VAV1/WASF1/RPH3AL/FARP2/SRGAP3/RABGAP1L/RANBP9/DENND4A/UNC13B/NCKAP1/TBC1D8/AKAP13/DENND3/ARHGEF9/ACAP2/RAB3GAP2/ITSN2/KCTD10/FGD3/TBCK/WHAMMP3/RGPD1/RGPD2	29
MYOM2	-0.955644	MF	GO:0005096	GTPase activator activity	20/512	273/17697	0.000142377	0.0340241	0.0316287	CHN1/ECT2/NF1/NRP1/RGS6/GIT2/SRGAP3/RABGAP1L/ARHGAP25/TBC1D8/RASA3/PLCB1/ACAP2/RAB3GAP2/TBC1D19/ARHGAP15/TBCK/TAGAP/RGPD1/RGPD2	20
DNAH5	-1.57619	MF	GO:0017048	Rho GTPase binding	15/512	177/17697	0.000201273	0.0340241	0.0316287	DIAPH2/DVL2/ECT2/RASGRF1/VAV1/WASF1/FARP2/SRGAP3/NCKAP1/AKAP13/ARHGEF9/ITSN2/KCTD10/FGD3/WHAMMP3	15
TNC	1.8523	MF	GO:0030695	GTPase regulator activity	21/512	304/17697	0.000220936	0.0340241	0.0316287	CHN1/ECT2/IPO5/NF1/NRP1/RGS6/GIT2/SRGAP3/RABGAP1L/ARHGAP25/TBC1D8/RASA3/PLCB1/ACAP2/RAB3GAP2/TBC1D19/ARHGAP15/TBCK/TAGAP/RGPD1/RGPD2	21
ADAM28	1.01598	MF	GO:0005085	guanyl-nucleotide exchange factor activity	16/512	214/17697	0.000515159	0.066112	0.0614575	ECT2/RASGRF1/VAV1/CYTH3/ELMO1/FARP2/DENND4A/AKAP13/DENND3/ARHGEF9/RAB3GAP2/ITSN2/DOCK10/FGD3/TAGAP/RGL4	16
CTNNA1	-0.599143	MF	GO:0045503	dynein light chain binding	5/512	25/17697	0.000653648	0.0719013	0.0668392	DNAH5/DNAH6/DYNC1I1/DNAH11/DYNC2H1	5
C12orf4	0.359301	KEGG	hsa05131	Shigellosis	19/256	246/8076	0.000289703	0.082855	0.0774574	ACTN1/RHOA/CASP4/GSK3B/IL1R1/ITPR2/PLCG2/PRKCE/PTK2/SKP1/WASF1/CYTH3/ATG5/ELMO1/AKT3/ACTR3/GLMN/PLCB1/PIK3R4	19
SLC4A8	-1.27703
COL23A1	0.684274
FSTL4	2.0297
GINM1	-0.300911
ATG5	0.454431
RASGRF1	-3.66324
COL11A1	5.55557
NCKAP1	0.615093
MTMR1	1.00537
SNCAIP	0.497931
IPO5	0.261979
ME1	1.95646
SLC9A7	1.46997
CACNB1	-0.43652
RHOA	-0.944899
IARS2	0.789363
SYT1	2.14704
ACSL4	-1.51469
POLR1A	0.722688
NUCKS1	0.47476
SLC44A1	0.824095
POLB	1.45069
MBD3	0.259425
ACTN1	0.509856
PTPN18	-0.585905
NFATC3	-0.671242
MCM2	3.27558
PPP2R2C	6.50193
ZNF532	0.721899
EIF4G3	0.319085
GTSE1	3.89904
ARHGAP15	-1.41594
EXOSC7	0.392849
FMO4	0.617164
ITM2A	-2.34296
EPHA6	3.26225
RSBN1	-0.50703
EXD2	-0.226125
MPP4	0.756597
PGR	-2.86452
GSK3B	0.410764
HSD17B2	0.996365
ADD1	-0.980986
GCN1	0.512093
STRN4	0.502627
DLD	0.458748
APOH	-3.75824
G2E3	0.943352
PHGDH	2.48038
UPRT	-0.659093
CBX5	0.297525
NRP1	-1.60922
PPM1F	-0.816378
HIRA	0.423889
HMGXB4	0.907105
VCPKMT	0.679029
HIF1A	0.796957
VRK1	1.50375
GINS1	3.95903
PABPC1L	1.76932
DNAJC5	0.284235
TM9SF4	0.677995
MANBAL	0.524632
CDK16	0.929053
ZDHHC15	-1.61846
STK24	0.686945
DHRS12	-1.10148
WDR59	0.459346
CMC2	0.77259
ZP2	-1.70749
ACSBG1	-1.06709
CEP152	1.3619
TJP1	-1.24355
CSPP1	-0.276226
TRPA1	3.15621
STK3	0.371472
GDAP1	1.18502
IL7	-0.926646
TRPS1	1.089
TUSC3	1.12965
KLHDC4	0.239436
CNTD2	3.34322
DENND3	-2.36717
PLEKHA4	-0.48075
DNAH11	-0.710884
GARS	1.1879
HYAL4	1.3225
USP42	0.470812
POU6F2	4.86774
COA1	0.648368
SPATA6L	-1.28802
FSD1L	-0.689571
XPNPEP1	0.587591
SMC3	0.407179
CYP2C18	1.90219
KPNB1	0.705081
HDAC5	-0.591865
PRKAR1A	-0.896185
RCVRN	-1.27792
TBC1D19	-0.287727
DCPS	0.337303
IL10RA	-1.2788
SOX6	0.935431
HPS5	-0.862276
DAO	-2.56694
KCTD10	-0.797915
TPD52L1	2.45888
WASF1	2.70143
CUL9	0.294863
NME5	-2.53398
GABRG2	7.14628
DROSHA	1.16261
SKP1	-0.2303
C9	2.29317
TCERG1	0.631917
ERGIC1	-0.767497
SMC4	1.59686
TIMMDC1	1.00747
PCCB	1.13736
UBE3A	0.223838
XRN1	0.228632
ACAP2	1.04712
ECT2	3.18428
FXR1	1.58857
PLXNA1	0.883524
KLHL18	-0.518708
ACTR3	0.686802
EPB41L5	-1.81988
ASB3	0.363434
DNAH6	-2.21584
KDM3A	0.949503
IL1R1	-1.43665
ABCB6	2.66471
PLEKHB2	-0.530365
KYNU	1.23225
PARD3B	-1.95413
ALMS1	0.427508
STXBP3	-0.292102
S100PBP	0.325083
C1orf21	-0.770849
CFHR3	2.30609
PHTF1	-0.35965
AKT3	-0.705779
GPR89A	0.916625
STX12	-1.35228
RCN2	1.26262
CHRNB4	4.84976
SPP1	4.4049
RAB3GAP2	0.284501
GDA	5.04311
GLE1	0.379997
NR4A3	-3.16677
ATL2	0.765027
MYCT1	-3.16199
GORAB	0.699016
TEX11	3.07265
CHRNA2	-3.06401
CRISPLD1	1.51722
RDH10	1.21916
TEX14	-1.06685
POLK	-0.892288
ANXA11	-0.845087
CCDC18	0.932457
HERPUD2	-0.197236
CIT	0.597275
ITPR2	-0.924154
ATP7B	-0.675031
ACVR1C	2.68779
SSR1	0.534228
NUP153	0.436164
PZP	-2.52609
FGD3	-1.3872
EPS15L1	0.436856
MACF1	-1.53058
GNGT1	7.89741
RFPL3	-1.11097
CHN1	-0.686251
EPB41L4A	-1.44994
CBFA2T3	-0.888846
LSM7	1.06172
SULT4A1	5.14117
OSBPL2	0.254487
C12orf65	0.364774
SYNE1	-3.08411
ARHGEF9	-0.605706
GSE1	-0.739273
ACLY	0.410034
NPHP4	-0.256244
LRRC9	2.17121
UBE2G1	0.561377
POPDC3	3.11021
PRMT7	0.421991
DAP3	0.899368
IGHMBP2	0.613139
SERINC3	-0.495521
DCTN4	-0.269099
TPTE2	1.70541
CHRM3	1.41976
TPT1	-0.663826
E2F5	0.668093
NUMB	-0.897761
CTIF	-1.01009
CHL1	0.679253
PTPN22	-1.26507
STT3A	0.595678
GOLM1	0.8872
FAM189A2	-4.00593
SDS	0.615288
RNFT2	2.02512
ANKRD6	-0.380956
CPM	-2.55327
KIAA0513	-1.14571
DOCK10	-1.10096
ARMC9	-1.20228
STAB2	-2.18241
LMO7	-2.86757
NUPL2	0.803786
EPRS	0.770762
IL1RN	0.951928
SAP130	0.512589
HS6ST1	1.33043
UGGT1	0.538342
TEX10	0.678578
TINAG	3.98384
RDX	-1.01895
NUSAP1	1.01561
LRRC49	-0.572174
SLC44A5	3.5372
DBR1	0.506085
AOX1	-2.97825
SECISBP2L	-2.22309
TMOD3	-0.64619
PRKG2	-1.1758
ENPEP	-1.16716
PAPSS1	-0.518433
FBN2	5.33576
AEBP2	0.875658
TMEM117	2.6778
GIT2	-0.537732
CSAD	0.628813
C14orf37	1.1896
BCL2A1	-1.17693
SCAPER	-0.625297
WDR93	-1.69728
CRTC3	-0.452294
UQCRC2	0.242093
NUDT7	-0.521128
VPS53	-0.281491
ABCA8	-4.18525
OSBPL1A	-0.377775
FBXO15	-1.22418
VAV1	-0.808908
ITGB3BP	0.68374
XCL1	1.01853
FCRL5	1.25931
CDC42BPA	-0.665494
PARP1	1.1711
WDPCP	0.502179
EXOC6B	0.736426
ZC3H8	1.41678
RAB5A	-0.463924
IGSF11	4.8876
MUC4	1.90589
TBCK	-0.262363
CAMK2D	-0.32851
USP53	-1.14493
NDUFS6	1.46529
PRIM2	1.66958
GABRR1	6.61574
TBC1D32	1.10975
LINC00525	2.22832
POMZP3	0.36032
ZNF711	1.55968
DIAPH2	-0.496302
NXF3	-2.41558
NDUFB9	0.937669
GSDMC	4.16929
UHRF2	0.333747
HAUS6	0.953166
CBWD5	0.776291
PLEKHS1	-0.895265
MTG1	1.01626
PAOX	0.384135
ADAM12	2.70249
SLC5A12	5.15427
EIF3M	0.63148
CCDC15	1.04441
CDH8	3.04165
GPM6A	-5.30521
FRMD4A	-1.04111
AKR1C2	5.62894
ITIH2	-1.58486
CENPU	3.0785
SLC35F4	1.34199
RABGAP1L	-0.537391
TMEM163	-2.28265
HAUS1	0.811558
POC5	0.259949
XRCC4	0.363204
BOLL	3.08564
TRIM36	-1.23907
TMEM123	0.650277
UTRN	-2.05086
LMNTD1	-2.32719
CDYL	0.874645
CD96	-0.552302
FBXL2	-0.727503
CHD1	-0.520261
ABI3BP	-3.33389
ABCA9	-2.43207
DISP1	-1.54777
CCSAP	0.722314
PDLIM3	-1.45427
LY96	-0.513077
CHODL	3.95243
NCAM2	-1.26668
GABPA	-0.531537
EPHB1	2.41521
VOPP1	0.722277
MOV10	0.541796
ELMO1	-1.31204
CFAP70	-1.59891
FAM122C	-0.310179
FAM122B	0.656759
NSMCE2	0.653681
VPS8	0.686163
SMG1	0.255303
LCA5L	-0.774308
UBN2	0.306201
MEGF11	-1.87538
NCK1	0.709164
DYNC1I1	2.8789
ALG8	0.719446
CES5A	2.7086
STARD9	-2.49063
RGL4	-1.10182
CHCHD6	0.460094
FAM207A	0.778262
LSS	-0.538075
PRMT2	-0.279197
PSMC2	0.727283
CELF5	2.30885
SHANK2	-1.32975
C1orf123	-0.578814
USP24	-0.191781
JAK1	-0.8254
GBP2	-0.439676
LMX1A	1.74815
TDRD5	4.5235
SPATA17	-1.04869
BROX	0.297851
ERCC3	0.474808
ARHGAP25	-1.24968
WDFY3	-0.580075
C3orf67	2.78722
RYK	0.90501
ZDHHC3	-0.456563
RPN1	0.648204
CCDC51	1.13108
PRMT9	-0.477788
CAGE1	2.38588
KLKB1	-1.53594
CDCA7L	0.923356
KIAA1324L	-1.93422
TAGAP	-1.349
RAD21	0.628419
CSMD3	1.40789
SUN1	0.548886
SVEP1	-2.69286
VCP	0.514199
DDIAS	2.28489
VDAC2	0.977182
AMOTL1	-0.733376
KIAA0355	-0.963207
WDR72	5.14198
PKD1L2	1.3501
TMX3	-0.259841
PRKCB	-1.56504
CLEC4D	-2.0918
NNMT	-1.60907
FBXO22	0.822289
SRP68	0.429916
ULK4	-0.896619
IRF2	-0.240661
FSTL5	5.1185
KCNAB1	-2.03548
PTK2	0.300692
ZFPM2	-1.35186
SEMA3E	-1.78293
PFKFB3	-0.648538
SOCS6	-0.337249
AKAP13	-1.72164
PKHD1	1.73547
FAM86JP	2.26371
PRKCE	-2.22492
MUC7	3.16958
COL24A1	1.1067
THOP1	1.22293
NEGR1	-2.70682
MACROD2	-2.64192
CERS6	1.48384
MUCL1	3.4896
DMXL1	-0.859421
NADSYN1	0.737193
IQCB1	1.11686
UGT2A1	3.69526
SLC19A1	-1.207
TOMM20	0.628312
XXYLT1	2.32723
CNTNAP2	5.54845
DENND4A	-0.402373
ANKRD36C	0.693072
IL20RB	5.57973
GLMN	0.851752
PCCA	-0.483901
SUGCT	2.32121
DLEU1	1.28219
FKBP9P1	1.97902
SHMT1	0.303359
CLVS1	0.915799
NR2C2	-0.39736
CD163	-2.02218
ACAD9	0.770549
PDE4DIP	-0.881804
SH2D4B	-2.34162
FAM220A	1.31454
PFAS	0.60709
GPC5	-2.05124
CDH5	-3.53226
NRXN1	2.65424
MED14	0.605024
TPRXL	5.25899
PCGF5	-0.730882
MAP3K15	-2.19305
CXCR2	-2.40827
OR56B4	2.2159
RPH3AL	-1.60723
RFX7	0.475219
RAD51B	0.549701
AP1S2	-0.974995
PLCB1	0.747269
RGS6	0.809898
MCEMP1	-5.32722
AP2A2	-0.66171
NPIPA1	0.429475
EFHC2	-0.859868
KCNH8	2.46402
ST6GALNAC3	-2.25166
PPP1R2	0.586099
MAP7D2	3.6585
NELL2	1.47406
SLC22A10	-2.49582
BRF1	0.31349
ANKS1B	-1.50556
FAF1	0.327262
RGPD2	1.17027
SMYD3	0.599571
TMLHE	0.632264
RASA3	-0.925825
DLEU7	-0.895852
POLR3C	0.315608
THBS2	1.75034
NKRF	1.04879
GLDN	-3.21365
RPS23	-0.62885
FAM183A	-1.65582
AKR1C1	4.5036
DYNC2H1	-0.8576
AGMO	2.55863
RGPD1	1.01735
SECISBP2	-0.609655
C17orf99	3.52254
GPR89B	0.784133
COL4A5	1.65899
CERKL	-2.13377
RBM34	0.38497
ADAT2	0.545655
KIR2DL4	0.751625
ZNF567	0.54605
DPY19L2P1	2.82426
ALG1L	4.26446
HLA-DRB1	-1.91424
SRGAP3	0.818751
IARS	0.927212
STK31	1.54962
ADH7	6.19113
PTPN1	-0.775697
PIK3R4	0.403663
MMP1	5.62723
NF1	0.422182
MVB12B	-1.92605
ANKRD36B	0.470321
SLC39A10	0.573548
CASP4	-0.519377
KANK2	-2.57754
DCHS2	1.40889
FAM114A1	0.276914
C2orf27A	0.620999
PLCG2	-0.791289
DNM3	-1.80359
MBP	-0.809988
NUP62CL	1.41433
UVRAG	-0.333875
ITSN2	-0.730163
ZNF587	0.795985
DDX39B	0.444996
SH2D1B	-2.14613
UNC13B	-2.01158
SYCP1	3.85668
TMEM184B	0.391854
TYW1	0.353595
NOS1AP	0.525714
SGMS1	-0.863446
C1orf53	0.649491
FANK1	-0.821518
SPRR2E	6.89187
LIPN	-2.61342
TBC1D8	0.404907
TCTN1	-0.407172
KRT17P5	2.52443
ATP6AP1L	-0.515839
LCMT1	0.414069
RFPL3S	1.25149
C1QTNF9B	1.37313
DOK6	-1.27307
TMEM191C	0.532765
DUXAP8	3.46472
CD200R1L	2.10373
SACM1L	-1.0142
EWSAT1	3.18666
LPAL2	-1.65747
CSNK1E	0.703917
OR7E5P	4.88058
LRRC69	1.03073
CBWD6	1.07598
HOMEZ	0.787459
TMLHE-AS1	1.00569
C12orf77	3.1193
HSBP1L1	-0.36957
LINC01359	-0.94137
SLC8A1-AS1	0.884598
LMCD1-AS1	1.35105
WASH7P	0.727617
LYPLAL1-AS1	-0.499694
HLA-DRB6	-2.22906
ANKRD36BP2	1.37212
FEZF1-AS1	5.97695
LINC01284	-1.13113
SERPINB9P1	-0.872385
ABCA9-AS1	3.6722
TRAF3IP2-AS1	-0.375006
MCTS1	0.666987
RAP2C-AS1	-0.304421
SLC6A1-AS1	-1.82504
LYRM9	-0.917876
LINC01251	1.69006
RNF219-AS1	-0.841503
CHL1-AS1	2.09128
MYO16-AS1	-3.0724
LINC00649	1.21591
KCNMB2-AS1	6.87583
TXNDC5	0.393342
AADACP1	2.01006
ISY1	0.609127
SYNPR-AS1	1.30896
LINC01192	4.33622
WDR86-AS1	-1.64017
DUXAP10	3.34806
LINC00461	5.24053
LINC00992	2.73527
CASC9	7.42494
LINC00989	-1.92172
LINC00491	7.29309
PRKDC	1.46381
TPTE2P1	0.83627
CASC19	6.17386
MIR2052HG	5.10565
BBOX1-AS1	6.88057
WTAPP1	3.46414
KLRC4-KLRK1	-0.643721
APOPT1	0.513257
OR13A1	1.54231
PSMA3-AS1	-0.531371
LINC00639	-0.996406
LINC00648	3.49996
ADAM20P1	1.68326
ULK4P2	-1.01877
MRC1	-3.70864
LINC01572	3.26479
DLGAP1-AS4	1.43339
KC6	5.04748
C1QTNF3-AMACR	0.874242
WHAMMP3	-0.701735
HYDIN2	0.681254
NEFL	5.51554
SRD5A2	-2.03624
LINC01163	1.65938
