# Supplementary material for: Pan cancer characterization of genes whose expression has been associated with LINE-1 antisense promoter activity
Source: Mob DNA. 2023 Sep 18;14:13. doi: 10.1186/s13100-023-00300-x (PMC10506190; doi:10.1186/s13100-023-00300-x)
Supplement: Supplementary file 7 — Additional file 7. Table S4. Analysis of methylation and copy number variation of L1 ASP-associated genes. [file 13100_2023_300_MOESM7_ESM.xlsx]

## Sheet: Table S4
Table S4.Analysis of methylation and copy number variation of L1 ASP-associated genes.
top 20 genes up-regulated in pan-cance	903 genes in 15 tumors																		interactions between proteins				promoter annotation
CENPU	gene id	gene name	KIRC	LUSC	BRCA	LUAD	COAD	LIHC	KICH	UCEC	THCA	HNSC	KIRP	PRAD	STAD	CHOL	GBM	SUM-down	#node	identifier	node_degree	cg00059782	CHR	MAPINFO	Strand	Type	gene	feature	cgi	feat.cgi	UCSC_CpG_Islands_Name	DHS	Enhancer	Phantom	Probe_SNPs	Probe_SNPs_10
MCM2	ENSG00000131018	SYNE1	1	1	1	1	1	1	1	1	1	1	1	1	1	1	1	15	ALG8	9606.ENSP00000299626	0		12	31226714	R	I	DDX11	TSS200	island	TSS200-island	chr12:31226343-31227186	NA	NA	high-CpG:31117952-31118014
GTSE1	ENSG00000138356	AOX1	1	1	1	1	1	1	1	1	1	1	1	1	1	1	0	14	CENPU	9606.ENSP00000281453	4	cg00079891	16	122716	F	I	RHBDF1	TSS200	island	TSS200-island	chr16:122017-122873	NA	TRUE
PABPC1L	ENSG00000141338	ABCA8	1	1	1	1	1	1	1	1	1	1	0	1	1	1	1	14	CIT	9606.ENSP00000376306	2	cg00088885	4	88896634	R	II	SPP1	TSS200	opensea	TSS200-opensea		NA	NA
ECT2	ENSG00000154258	ABCA9	1	1	1	1	1	1	1	1	1	1	1	0	1	1	1	14	COL11A1	9606.ENSP00000359114	0	cg00172849	1	103574532	F	II	COL11A1	TSS1500	opensea	TSS1500-opensea		NA	TRUE
NSMCE2	ENSG00000171132	PRKCE	1	1	1	1	1	1	0	1	1	1	1	1	1	1	1	14	DDIAS	9606.ENSP00000435421	1	cg00325149	1	103574072	R	II	COL11A1	TSS200	opensea	TSS200-opensea		NA	NA
DDIAS	ENSG00000117758	STX12	1	1	1	1	1	1	1	1	1	1	1	1	1	0	0	13	DDX11	9606.ENSP00000440402	1	cg00501711	20	43538180	R	II	PABPC1L	TSS1500	shore	TSS1500-shore	chr20:43538616-43539060	NA	NA
DUXAP8	ENSG00000119508	NR4A3	1	1	1	1	1	1	0	1	1	1	1	1	1	0	1	13	ECT2	9606.ENSP00000376457	5	cg00583003	4	88895691	R	II	SPP1	TSS1500	opensea	TSS1500-opensea		NA	NA
NCAPD2	ENSG00000138593	SECISBP2L	1	1	1	1	1	1	0	1	1	1	1	0	1	1	1	13	GARS	9606.ENSP00000373918	0	cg00940212	7	30633751	R	II	GARS	TSS1500	shore	TSS1500-shore	chr7:30634124-30635058	NA	NA
GINS1	ENSG00000140876	NUDT7	1	1	1	1	1	1	0	1	1	1	1	1	1	1	0	13	GINS1	9606.ENSP00000262460	3	cg01262217	16	123363	F	II	RHBDF1	TSS1500	shore	TSS1500-shore	chr16:122017-122873	NA	NA			rs2858052
SPP1	ENSG00000150625	GPM6A	1	1	0	1	1	1	1	1	1	1	1	1	1	1	0	13	GTSE1	9606.ENSP00000415430	5	cg01639485	12	31226718	R	I	DDX11	TSS200	island	TSS200-island	chr12:31226343-31227186	NA	NA	high-CpG:31117952-31118014
CIT	ENSG00000172260	NEGR1	0	1	1	1	1	1	1	1	1	1	1	1	1	0	1	13	LSM7	9606.ENSP00000252622	1	cg02304656	12	6603152	R	I	NCAPD2	TSS200	island	TSS200-island	chr12:6602919-6603306	NA	NA
LSM7	ENSG00000184005	ST6GALNAC3	1	1	1	1	1	1	1	1	0	1	1	1	1	1	0	13	MCM2	9606.ENSP00000265056	6	cg02549628	4	88896208	R	II	SPP1	TSS1500	opensea	TSS1500-opensea		NA	NA
ALG8	ENSG00000211456	SACM1L	1	1	1	1	1	1	0	1	1	1	1	1	0	1	1	13	NCAPD2	9606.ENSP00000325017	4	cg02802871	20	25388289	R	I	GINS1	TSS200	island	TSS200-island	chr20:25388232-25388642	NA	NA			rs6050592
DUXAP10	ENSG00000036448	MYOM2	1	1	1	1	1	1	1	1	0	1	1	0	1	0	1	12	NSMCE2	9606.ENSP00000287437	0	cg02917210	8	126103343	R	II	NSMCE2	TSS1500	shore	TSS1500-shore	chr8:126103760-126104122	NA	NA
RHBDF1	ENSG00000055211	GINM1	1	1	1	1	1	1	1	1	0	0	1	1	1	1	0	12	PABPC1L	9606.ENSP00000255136	0	cg03406422	11	77850844	F	II	ALG8	TSS200	island	TSS200-island	chr11:77850482-77850845	NA	NA	high-CpG:77528444-77528544
DDX11	ENSG00000081019	RSBN1	1	1	1	1	1	1	1	1	1	1	1	1	0	0	0	12	RHBDF1	9606.ENSP00000262316	0	cg03520644	1	103574523	F	I	COL11A1	TSS1500	opensea	TSS1500-opensea		NA	TRUE
COL11A1	ENSG00000102383	ZDHHC15	1	1	1	1	1	0	1	1	1	1	1	1	1	0	0	12	SPP1	9606.ENSP00000378517	0	cg03839625	20	43538443	F	II	PABPC1L	TSS1500	shore	TSS1500-shore	chr20:43538616-43539060	TRUE	NA
STRN4	ENSG00000120279	MYCT1	0	1	1	1	1	1	1	1	0	1	1	1	1	1	0	12	STRN4	9606.ENSP00000375777	0	cg04260507	16	123601	R	II	RHBDF1	TSS1500	shore	TSS1500-shore	chr16:122017-122873	NA	NA
SMAD1	ENSG00000137710	RDX	1	1	1	1	1	1	0	1	1	0	1	1	1	1	0	12				cg04574442	11	77850977	F	II	ALG8	TSS1500	shore	TSS1500-shore	chr11:77850482-77850845	NA	NA
	ENSG00000140386	SCAPER	1	1	1	1	1	1	0	1	0	1	1	1	1	0	1	12				cg04995976	16	123246	R	I	RHBDF1	TSS1500	shore	TSS1500-shore	chr16:122017-122873	NA	TRUE
	ENSG00000145390	USP53	1	1	1	1	1	1	0	1	1	1	1	1	1	0	0	12				cg06138505	3	127317209	F	II	MCM2	TSS200	island	TSS200-island	chr3:127316984-127317531	NA	NA		rs34940832
	ENSG00000154727	GABPA	0	1	1	1	1	1	1	1	1	1	1	1	0	1	0	12				cg06148342	12	31226632	R	I	DDX11	TSS200	island	TSS200-island	chr12:31226343-31227186	NA	NA
	ENSG00000163625	WDFY3	1	1	1	1	1	1	0	1	1	1	1	0	1	0	1	12				cg06230303	16	123353	F	II	RHBDF1	TSS1500	shore	TSS1500-shore	chr16:122017-122873	NA	NA		rs2858052
	ENSG00000164169	PRMT9	1	1	1	1	0	1	0	1	1	1	1	1	1	1	0	12				cg06377353	20	25388089	F	I	GINS1	TSS1500	shore	TSS1500-shore	chr20:25388232-25388642	NA	NA		rs8123949	rs6083845
	ENSG00000166262	FAM227B	1	0	0	1	1	1	1	1	1	1	1	1	1	1	0	12				cg06449863	20	25388049	R	II	GINS1	TSS1500	shore	TSS1500-shore	chr20:25388232-25388642	NA	NA
	ENSG00000172869	DMXL1	1	1	1	1	1	1	0	1	1	1	1	0	1	0	1	12				cg06943682	22	46692606	R	I	GTSE1	TSS200	island	TSS200-island	chr22:46692210-46693349	NA	NA
	ENSG00000179915	NRXN1	1	0	1	1	1	1	1	1	1	0	1	1	1	0	1	12				cg07142400	12	6602447	F	I	NCAPD2	TSS1500	island	TSS1500-island	chr12:6602360-6602586	NA	NA		rs7976591
	ENSG00000180628	PCGF5	1	1	1	1	1	1	0	1	1	1	1	1	0	1	0	12				cg07186765	7	30633504	R	II	GARS	TSS1500	shore	TSS1500-shore	chr7:30634124-30635058	NA	NA
	ENSG00000183230	CTNNA3	0	0	1	1	1	1	0	1	1	1	1	1	1	1	1	12				cg07797805	20	25387977	R	II	GINS1	TSS1500	shore	TSS1500-shore	chr20:25388232-25388642	NA	NA
	ENSG00000228063	LYPLAL1-AS1	1	1	1	1	1	0	1	1	1	1	1	1	1	0	0	12				cg08629647	22	46692562	R	II	GTSE1	TSS200	island	TSS200-island	chr22:46692210-46693349	NA	NA
	ENSG00000232859	LYRM9	1	1	1	1	1	0	1	1	1	1	0	1	1	0	1	12				cg08651281	3	172471811	F	II	ECT2	TSS1500	shelf	TSS1500-shelf	chr3:172468372-172468845	NA	NA		rs9821163
	ENSG00000007168	PAFAH1B1	1	1	1	1	1	1	0	1	1	0	0	1	1	0	1	11				cg08726071	20	25388287	R	I	GINS1	TSS200	island	TSS200-island	chr20:25388232-25388642	NA	NA			rs6050592
	ENSG00000024048	UBR2	1	1	1	0	1	1	0	1	1	0	1	1	0	1	1	11				cg08734660	7	30634111	R	II	GARS	TSS200	shore	TSS200-shore	chr7:30634124-30635058	NA	NA
	ENSG00000076258	FMO4	1	0	1	1	1	1	1	0	1	0	1	1	1	1	0	11				cg09022458	20	43538617	R	II	PABPC1L	TSS200	island	TSS200-island	chr20:43538616-43539060	TRUE	NA
	ENSG00000131089	ARHGEF9	1	1	1	0	1	0	0	1	1	1	1	1	1	0	1	11				cg09113560	16	122812	R	II	RHBDF1	TSS200	island	TSS200-island	chr16:122017-122873	NA	TRUE
	ENSG00000134030	CTIF	1	1	1	1	1	0	0	1	0	1	1	1	1	0	1	11				cg09200497	7	30634125	R	II	GARS	TSS200	island	TSS200-island	chr7:30634124-30635058	NA	NA
	ENSG00000136011	STAB2	0	1	1	1	1	1	0	1	1	1	1	0	1	1	0	11				cg09328228	20	43538527	F	II	PABPC1L	TSS200	shore	TSS200-shore	chr20:43538616-43539060	TRUE	NA
	ENSG00000141447	OSBPL1A	0	1	1	1	1	1	0	1	1	1	0	1	1	0	1	11				cg09377899	12	31226606	R	II	DDX11	TSS200	island	TSS200-island	chr12:31226343-31227186	NA	NA
	ENSG00000149557	FEZ1	0	0	1	1	1	1	1	1	1	0	1	1	1	1	0	11				cg09687947	3	127316944	F	II	MCM2	TSS1500	shore	TSS1500-shore	chr3:127316984-127317531	NA	NA
	ENSG00000154175	ABI3BP	0	1	1	1	1	1	1	1	1	1	0	1	1	0	0	11				cg10111146	3	172471603	F	II	ECT2	TSS1500	shelf	TSS1500-shelf	chr3:172468372-172468845	NA	NA			rs76270481
	ENSG00000165124	SVEP1	1	1	1	1	1	1	0	1	1	1	1	0	1	0	0	11				cg10691006	3	127316993	R	II	MCM2	TSS1500	island	TSS1500-island	chr3:127316984-127317531	NA	NA
	ENSG00000169282	KCNAB1	0	1	1	1	1	1	0	1	0	1	1	1	1	0	1	11				cg10836402	12	31226622	R	II	DDX11	TSS200	island	TSS200-island	chr12:31226343-31227186	NA	NA
	ENSG00000187240	DYNC2H1	1	1	1	1	1	0	1	1	1	0	1	1	1	0	0	11				cg10853063	12	120315422	F	II	CIT	TSS1500	shore	TSS1500-shore	chr12:120314847-120315169	NA	NA
	ENSG00000232160	RAP2C-AS1	1	1	1	0	1	0	1	1	1	1	1	1	1	0	0	11				cg11345172	12	120315133	F	II	CIT	TSS200	island	TSS200-island	chr12:120314847-120315169	NA	NA	high-CpG:118799457-118799525
	ENSG00000008311	AASS	1	0	1	0	0	1	1	1	1	1	1	0	1	1	0	10				cg11696392	11	77850819	F	I	ALG8	TSS200	island	TSS200-island	chr11:77850482-77850845	NA	NA	high-CpG:77528444-77528544	rs11237409	rs2156785
	ENSG00000018236	CNTN1	1	0	1	0	1	0	1	1	1	0	1	1	1	0	1	10				cg12660026	12	6602556	F	I	NCAPD2	TSS1500	island	TSS1500-island	chr12:6602360-6602586	NA	NA	high-CpG:6472782-6472838
	ENSG00000078596	ITM2A	0	1	1	1	1	0	0	1	1	1	1	1	1	0	0	10				cg12735820	3	127316985	F	I	MCM2	TSS1500	island	TSS1500-island	chr3:127316984-127317531	NA	NA
	ENSG00000082175	PGR	1	1	0	1	1	0	0	1	0	1	1	1	1	0	1	10				cg13035437	7	30634158	F	I	GARS	TSS200	island	TSS200-island	chr7:30634124-30635058	NA	NA
	ENSG00000108840	HDAC5	0	1	1	1	1	0	0	1	0	1	1	1	1	0	1	10				cg13733310	7	30634134	R	II	GARS	TSS200	island	TSS200-island	chr7:30634124-30635058	NA	NA
	ENSG00000110906	KCTD10	0	1	1	1	1	0	0	1	1	0	1	1	1	0	1	10				cg13848848	12	6603150	R	II	NCAPD2	TSS200	island	TSS200-island	chr12:6602919-6603306	NA	NA
	ENSG00000112146	FBXO9	1	0	0	1	1	0	1	1	1	1	1	0	1	0	1	10				cg14123153	12	6602654	F	II	NCAPD2	TSS1500	shore	TSS1500-shore	chr12:6602919-6603306	NA	NA		rs11545055
	ENSG00000116117	PARD3B	1	1	1	1	1	0	0	1	1	1	1	0	1	0	0	10				cg15117252	11	77850838	F	II	ALG8	TSS200	island	TSS200-island	chr11:77850482-77850845	NA	NA	high-CpG:77528444-77528544
	ENSG00000152818	UTRN	1	1	1	1	1	0	1	1	0	1	1	0	1	0	0	10				cg15588266	20	43538539	F	II	PABPC1L	TSS200	shore	TSS200-shore	chr20:43538616-43539060	TRUE	NA
	ENSG00000154553	PDLIM3	0	1	1	1	1	0	1	1	1	1	0	1	1	0	0	10				cg15666177	11	77851044	F	II	ALG8	TSS1500	shore	TSS1500-shore	chr11:77850482-77850845	NA	NA		rs61900251
	ENSG00000169946	ZFPM2	0	1	1	1	1	1	0	1	1	1	0	1	1	0	0	10				cg15710695	11	77850908	F	II	ALG8	TSS1500	shore	TSS1500-shore	chr11:77850482-77850845	NA	NA
	ENSG00000178104	PDE4DIP	1	1	0	1	1	0	1	0	0	1	1	1	1	1	0	10				cg15886307	12	120315669	F	II	CIT	TSS1500	shore	TSS1500-shore	chr12:120314847-120315169	NA	NA
	ENSG00000187699	C2orf88	1	0	1	1	1	1	0	0	1	1	1	1	1	0	0	10				cg15987124	12	6603172	R	I	NCAPD2	TSS200	island	TSS200-island	chr12:6602919-6603306	NA	NA
	ENSG00000188153	COL4A5	1	0	0	1	1	0	1	1	1	0	1	1	1	0	1	10				cg16864700	12	31226536	R	I	DDX11	TSS1500	island	TSS1500-island	chr12:31226343-31227186	NA	NA
	ENSG00000197959	DNM3	1	1	1	1	0	0	1	1	0	0	1	1	1	0	1	10				cg16968885	1	103574619	R	II	COL11A1	TSS1500	opensea	TSS1500-opensea		NA	TRUE
	ENSG00000198382	UVRAG	0	1	1	1	1	1	0	1	1	0	1	1	0	0	1	10				cg17199481	16	123676	F	II	RHBDF1	TSS1500	shore	TSS1500-shore	chr16:122017-122873	NA	NA
	ENSG00000198574	SH2D1B	0	1	1	1	1	1	0	1	0	1	1	1	0	0	1	10				cg17255214	20	43538372	F	II	PABPC1L	TSS1500	shore	TSS1500-shore	chr20:43538616-43539060	TRUE	NA		rs79553551
	ENSG00000259070	LINC00639	0	1	1	1	1	0	1	1	0	1	1	1	0	0	1	10				cg18884805	22	46692594	R	I	GTSE1	TSS200	island	TSS200-island	chr22:46692210-46693349	NA	NA
	ENSG00000260314	MRC1	0	1	1	1	1	1	1	1	0	0	1	1	0	1	0	10				cg18921183	12	6602631	R	II	NCAPD2	TSS1500	shore	TSS1500-shore	chr12:6602919-6603306	NA	NA
	ENSG00000002746	HECW1	1	0	1	0	1	1	1	0	1	0	1	1	0	0	1	9				cg19787033	11	77850962	F	II	ALG8	TSS1500	shore	TSS1500-shore	chr11:77850482-77850845	NA	NA
	ENSG00000008405	CRY1	1	1	0	1	0	1	1	1	1	1	0	0	0	1	0	9				cg19832597	7	30634132	R	II	GARS	TSS200	island	TSS200-island	chr7:30634124-30635058	NA	NA
	ENSG00000010322	NISCH	1	1	1	1	1	0	0	0	0	1	1	0	1	0	1	9				cg19861833	12	6602367	F	II	NCAPD2	TSS1500	island	TSS1500-island	chr12:6602360-6602586	NA	NA		rs71579341	rs11559082
	ENSG00000010404	IDS	0	1	1	0	1	1	0	1	0	0	1	1	1	0	1	9				cg19988880	12	120315283	F	II	CIT	TSS200	shore	TSS200-shore	chr12:120314847-120315169	NA	NA
	ENSG00000087274	ADD1	0	1	1	1	1	0	0	1	0	1	0	1	1	0	1	9				cg20049663	12	6602643	F	II	NCAPD2	TSS1500	shore	TSS1500-shore	chr12:6602919-6603306	NA	NA			rs11545053
	ENSG00000104067	TJP1	1	1	1	1	1	0	0	1	0	1	1	0	1	0	0	9				cg20258154	12	120315129	F	I	CIT	TSS200	island	TSS200-island	chr12:120314847-120315169	NA	NA	high-CpG:118799457-118799525
	ENSG00000108946	PRKAR1A	1	1	1	1	0	0	0	1	0	1	1	1	0	0	1	9				cg20379012	8	126103681	F	II	NSMCE2	TSS1500	shore	TSS1500-shore	chr8:126103760-126104122	NA	NA
	ENSG00000114062	UBE3A	1	0	0	0	1	1	0	1	1	1	1	0	0	1	1	9				cg20608338	3	127316362	F	II	MCM2	TSS1500	shore	TSS1500-shore	chr3:127316984-127317531	NA	NA
	ENSG00000115109	EPB41L5	1	1	0	1	0	1	1	0	1	1	1	0	0	1	0	9				cg20960443	7	30634175	F	II	GARS	TSS200	island	TSS200-island	chr7:30634124-30635058	NA	NA
	ENSG00000115594	IL1R1	1	1	1	1	1	1	1	1	0	0	0	0	0	1	0	9				cg20982475	12	120315144	F	II	CIT	TSS200	island	TSS200-island	chr12:120314847-120315169	NA	NA
	ENSG00000116266	STXBP3	1	1	0	1	1	0	0	1	1	1	1	1	0	0	0	9				cg21074810	11	77850809	F	I	ALG8	TSS200	island	TSS200-island	chr11:77850482-77850845	NA	NA	high-CpG:77528444-77528544	rs2156785	rs582266
	ENSG00000126838	PZP	0	1	1	1	1	1	1	0	0	1	1	0	0	1	0	9				cg21731578	11	77850887	R	II	ALG8	TSS200	shore	TSS200-shore	chr11:77850482-77850845	NA	NA	high-CpG:77528444-77528544
	ENSG00000127603	MACF1	1	1	1	1	0	1	0	1	0	0	1	1	0	0	1	9				cg22159075	3	127317137	F	I	MCM2	TSS200	island	TSS200-island	chr3:127316984-127317531	NA	NA
	ENSG00000133687	TMTC1	1	0	1	1	1	0	0	1	0	0	1	1	1	0	1	9				cg22526288	12	120315168	F	II	CIT	TSS200	island	TSS200-island	chr12:120314847-120315169	NA	NA		rs71454617
	ENSG00000133704	IPO8	1	0	1	0	1	1	0	1	1	0	1	1	0	1	0	9				cg22758330	7	30634171	F	I	GARS	TSS200	island	TSS200-island	chr7:30634124-30635058	NA	NA
	ENSG00000138792	ENPEP	0	1	1	1	0	1	1	1	0	0	1	0	1	1	0	9				cg24001719	20	25388278	R	I	GINS1	TSS200	island	TSS200-island	chr20:25388232-25388642	NA	NA
	ENSG00000140740	UQCRC2	1	0	1	0	1	1	0	0	0	1	0	1	1	1	1	9				cg24015316	22	46692631	R	I	GTSE1	TSS200	island	TSS200-island	chr22:46692210-46693349	NA	NA
	ENSG00000143776	CDC42BPA	1	1	1	0	1	0	1	1	0	0	1	1	0	0	1	9				cg24178500	20	43538586	R	II	PABPC1L	TSS200	shore	TSS200-shore	chr20:43538616-43539060	TRUE	NA
	ENSG00000144357	UBR3	1	0	1	0	0	1	0	1	0	1	1	1	0	1	1	9				cg24199050	22	46692564	R	I	GTSE1	TSS200	island	TSS200-island	chr22:46692210-46693349	NA	NA
	ENSG00000149124	GLYAT	1	0	1	1	1	1	1	0	0	1	0	0	1	1	0	9				cg24495344	1	103574097	R	II	COL11A1	TSS200	opensea	TSS200-opensea		NA	NA
	ENSG00000151474	FRMD4A	0	1	1	1	1	0	1	0	1	0	1	0	1	0	1	9				cg25187463	12	31226441	F	II	DDX11	TSS1500	island	TSS1500-island	chr12:31226343-31227186	NA	NA
	ENSG00000163812	ZDHHC3	1	1	1	1	1	0	0	0	0	1	1	1	1	0	0	9				cg25499017	12	120315162	F	II	CIT	TSS200	island	TSS200-island	chr12:120314847-120315169	NA	NA
	ENSG00000164989	CCDC171	1	0	1	0	0	0	1	1	1	1	1	1	0	0	1	9				cg25588969	20	25388199	R	I	GINS1	TSS200	shore	TSS200-shore	chr20:25388232-25388642	NA	NA
	ENSG00000166501	PRKCB	0	1	0	1	1	1	1	1	0	0	0	1	1	0	1	9				cg25734420	3	127317128	F	I	MCM2	TSS200	island	TSS200-island	chr3:127316984-127317531	NA	NA	high-CpG:128799710-128799819
	ENSG00000175198	PCCA	1	1	1	0	0	1	0	0	1	1	1	0	1	1	0	9				cg26120617	12	6603256	R	II	NCAPD2	TSS200	island	TSS200-island	chr12:6602919-6603306	NA	NA
	ENSG00000176974	SHMT1	1	0	1	0	0	1	1	0	0	1	1	1	1	1	0	9				cg26256793	1	103574469	R	II	COL11A1	TSS1500	opensea	TSS1500-opensea		NA	TRUE
	ENSG00000185046	ANKS1B	0	1	0	0	1	0	1	1	1	1	0	1	1	0	1	9				cg26913669	1	103574958	F	II	COL11A1	TSS1500	opensea	TSS1500-opensea		NA	TRUE
	ENSG00000185630	PBX1	1	0	0	1	1	0	1	1	0	1	1	1	1	0	0	9				cg27281285	12	120315368	F	II	CIT	TSS1500	shore	TSS1500-shore	chr12:120314847-120315169	NA	NA
	ENSG00000188283	ZNF383	0	0	1	1	1	0	0	1	1	1	1	1	1	0	0	9
	ENSG00000196814	MVB12B	0	1	1	1	1	0	0	1	0	1	1	1	0	0	1	9
	ENSG00000197256	KANK2	0	1	1	1	1	0	1	1	0	0	1	1	1	0	0	9
	ENSG00000197943	PLCG2	1	1	1	1	1	1	0	0	1	0	1	1	0	0	0	9
	ENSG00000198399	ITSN2	0	1	1	1	1	0	0	0	1	1	0	1	1	0	1	9
	ENSG00000206052	DOK6	0	1	0	1	1	0	1	1	1	0	1	0	1	0	1	9
	ENSG00000277893	SRD5A2	1	1	0	0	0	1	1	1	0	1	1	1	0	1	0	9
	ENSG00000008294	SPAG9	0	1	1	1	1	1	0	1	1	0	0	1	0	0	0	8
	ENSG00000037637	FBXO42	0	0	1	1	1	0	1	0	1	1	1	0	1	0	0	8
	ENSG00000067560	RHOA	1	1	0	1	1	0	0	1	0	1	0	1	1	0	0	8
	ENSG00000068366	ACSL4	1	1	1	1	0	0	1	0	0	0	1	1	0	0	1	8
	ENSG00000072736	NFATC3	0	1	1	1	0	1	0	0	1	0	1	1	0	1	0	8
	ENSG00000075884	ARHGAP15	0	1	0	1	1	1	1	0	1	0	0	1	0	1	0	8
	ENSG00000102796	DHRS12	0	1	1	1	0	1	0	1	0	1	0	0	1	1	0	8
	ENSG00000103310	ZP2	1	1	0	0	0	0	1	1	1	1	1	1	0	0	0	8
	ENSG00000108242	CYP2C18	1	0	0	0	1	1	1	0	0	1	0	0	1	1	1	8
	ENSG00000109047	RCVRN	0	1	1	1	1	1	0	1	0	1	0	0	0	0	1	8
	ENSG00000110367	DDX6	0	0	1	0	1	1	0	1	1	1	1	0	0	0	1	8
	ENSG00000110756	HPS5	1	1	1	1	0	1	0	0	0	0	1	1	0	1	0	8
	ENSG00000110887	DAO	1	1	0	1	1	1	1	0	0	0	1	0	0	1	0	8
	ENSG00000115423	DNAH6	0	1	1	1	0	1	1	0	1	1	0	0	0	1	0	8
	ENSG00000117020	AKT3	0	1	1	1	1	0	0	1	0	0	0	1	1	0	1	8
	ENSG00000119787	ATL2	1	0	1	0	0	0	0	1	0	0	1	1	1	1	1	8
	ENSG00000122359	ANXA11	1	1	1	1	1	0	0	0	0	1	0	0	1	0	1	8
	ENSG00000123612	ACVR1C	1	0	1	0	1	1	0	0	0	0	1	1	0	1	1	8
	ENSG00000131725	WDR44	0	0	1	0	1	1	0	1	0	0	0	1	1	1	1	8
	ENSG00000132824	SERINC3	0	1	1	1	0	1	0	1	0	0	0	1	0	1	1	8
	ENSG00000133961	NUMB	0	1	1	1	1	1	0	0	1	0	0	1	0	1	0	8
	ENSG00000135063	FAM189A2	0	1	1	1	1	0	0	0	1	1	1	0	1	0	0	8
	ENSG00000135709	KIAA0513	1	1	0	1	1	0	0	0	0	1	0	1	1	0	1	8
	ENSG00000136153	LMO7	1	1	0	1	0	1	0	0	0	1	1	0	1	0	1	8
	ENSG00000137821	LRRC49	1	1	0	1	0	0	1	1	0	0	0	1	1	0	1	8
	ENSG00000138669	PRKG2	0	1	1	1	1	0	1	0	1	0	0	1	1	0	0	8
	ENSG00000145349	CAMK2D	0	1	1	0	1	1	0	1	0	0	0	1	1	1	0	8
	ENSG00000147202	DIAPH2	0	1	1	1	0	1	0	1	0	1	0	1	0	1	0	8
	ENSG00000147206	NXF3	1	1	0	1	0	1	1	1	0	0	0	1	0	1	0	8
	ENSG00000152061	RABGAP1L	1	1	0	1	1	0	0	0	0	1	1	1	0	0	1	8
	ENSG00000155816	FMN2	1	0	1	0	1	0	0	0	1	0	1	1	1	0	1	8
	ENSG00000155849	ELMO1	0	1	1	1	1	0	0	0	1	0	0	1	0	1	1	8
	ENSG00000158560	DYNC1I1	0	0	1	0	1	0	1	0	1	0	1	1	1	0	1	8
	ENSG00000159433	STARD9	0	1	1	1	1	0	0	1	0	0	0	1	1	0	1	8
	ENSG00000159461	AMFR	1	0	0	0	0	1	0	1	0	1	1	1	1	1	0	8
	ENSG00000160216	AGPAT3	1	0	0	0	1	0	0	0	1	1	1	0	1	1	1	8
	ENSG00000160285	LSS	1	1	1	1	0	0	0	0	1	0	1	0	1	1	0	8
	ENSG00000160310	PRMT2	0	1	1	1	1	0	1	0	0	1	0	1	1	0	0	8
	ENSG00000162434	JAK1	0	1	1	1	1	1	1	1	0	0	0	1	0	0	0	8
	ENSG00000163219	ARHGAP25	0	1	1	1	1	1	0	1	1	0	0	1	0	0	0	8
	ENSG00000164344	KLKB1	0	1	1	0	1	1	1	0	1	1	0	0	0	1	0	8
	ENSG00000166025	AMOTL1	0	1	1	1	1	0	0	1	1	0	0	1	1	0	0	8
	ENSG00000168310	IRF2	0	1	0	1	1	1	0	1	0	0	0	1	1	1	0	8
	ENSG00000170525	PFKFB3	1	1	1	1	0	1	1	0	0	0	1	1	0	0	0	8
	ENSG00000170677	SOCS6	0	1	0	0	1	1	0	1	1	1	0	1	0	1	0	8
	ENSG00000174485	DENND4A	0	1	1	1	1	1	0	1	0	0	1	0	0	0	1	8
	ENSG00000180815	MAP3K15	1	1	1	1	1	0	0	0	1	0	1	1	0	0	0	8
	ENSG00000183690	EFHC2	0	1	0	0	1	0	1	1	1	1	0	1	1	0	0	8
	ENSG00000185973	TMLHE	1	0	1	0	0	1	0	0	0	1	1	1	1	1	0	8
	ENSG00000187742	SECISBP2	1	1	0	1	0	0	0	1	1	0	1	0	0	1	1	8
	ENSG00000197971	MBP	1	1	1	1	1	1	0	0	0	1	0	0	0	0	1	8
	ENSG00000213071	LPAL2	0	1	1	1	0	1	1	1	0	0	0	1	0	1	0	8
	ENSG00000214944	ARHGEF28	0	0	1	1	0	0	0	1	1	1	0	1	1	0	1	8
	ENSG00000250334	LINC00989	0	1	1	1	0	0	1	1	0	0	1	1	1	0	0	8
	ENSG00000276141	WHAMMP3	0	1	1	1	1	1	0	1	1	0	0	0	1	0	0	8
	ENSG00000008118	CAMK1G	1	1	0	0	0	0	1	1	0	0	1	1	0	0	1	7
	ENSG00000022840	RNF10	1	1	0	0	1	0	0	0	0	1	1	0	1	0	1	7
	ENSG00000036257	CUL3	1	0	0	0	1	1	1	0	0	1	1	0	0	0	1	7
	ENSG00000057663	ATG5	1	0	0	0	1	1	1	0	0	0	1	1	0	1	0	7
	ENSG00000065243	PKN2	1	0	1	0	1	1	0	1	1	0	0	1	0	0	0	7
	ENSG00000067141	NEO1	1	0	1	1	1	0	0	0	1	0	1	0	0	0	1	7
	ENSG00000080802	CNOT4	0	0	1	0	1	0	0	1	1	1	0	1	0	1	0	7
	ENSG00000081177	EXD2	1	1	0	1	1	0	0	1	1	1	0	0	0	0	0	7
	ENSG00000086696	HSD17B2	1	0	1	0	1	1	1	0	0	0	0	1	1	0	0	7
	ENSG00000091140	DLD	1	0	1	0	1	1	0	0	0	1	0	1	0	1	0	7
	ENSG00000100034	PPM1F	0	1	1	1	0	0	0	1	0	0	1	1	1	0	0	7
	ENSG00000104447	TRPS1	1	0	0	0	1	0	1	0	1	1	0	1	1	0	0	7
	ENSG00000109680	TBC1D19	1	1	0	0	0	0	0	1	1	0	1	1	1	0	0	7
	ENSG00000110693	SOX6	1	0	1	0	1	1	0	0	0	1	0	1	1	0	0	7
	ENSG00000111907	TPD52L1	1	0	0	0	0	1	0	0	0	1	0	1	1	1	1	7
	ENSG00000113558	SKP1	1	1	0	0	1	0	0	1	0	1	1	0	1	0	0	7
	ENSG00000116667	C1orf21	0	1	0	1	1	0	0	1	0	1	0	0	1	0	1	7
	ENSG00000122557	HERPUD2	0	1	1	0	0	0	0	1	1	0	0	1	1	1	0	7
	ENSG00000123104	ITPR2	1	1	1	0	0	1	0	0	0	1	1	0	0	1	0	7
	ENSG00000129595	EPB41L4A	0	1	0	1	1	1	0	0	0	1	0	1	1	0	0	7
	ENSG00000129993	CBFA2T3	0	1	0	1	0	1	0	1	0	0	0	0	1	1	1	7
	ENSG00000133812	SBF2	1	0	1	0	1	0	0	1	0	1	1	0	1	0	0	7
	ENSG00000135299	ANKRD6	0	1	1	1	1	0	1	1	0	1	0	0	0	0	0	7
	ENSG00000138594	TMOD3	0	1	0	1	1	0	0	0	0	1	1	1	1	0	0	7
	ENSG00000138663	COPS4	1	0	0	0	0	1	0	1	0	1	1	1	1	0	0	7
	ENSG00000139436	GIT2	0	1	1	1	1	0	0	1	1	0	0	1	0	0	0	7
	ENSG00000140943	MBTPS1	1	0	1	0	1	1	0	1	0	0	0	1	0	0	1	7
	ENSG00000141376	BCAS3	1	0	0	1	0	0	1	0	1	0	0	1	1	0	1	7
	ENSG00000144036	EXOC6B	1	0	1	0	1	0	0	1	0	0	0	1	1	0	1	7
	ENSG00000144451	SPAG16	1	0	0	0	1	0	1	1	1	1	0	0	1	0	0	7
	ENSG00000144566	RAB5A	1	1	0	1	0	1	0	0	0	1	0	0	1	1	0	7
	ENSG00000147036	LANCL3	1	0	1	0	1	0	0	0	0	1	1	1	1	0	0	7
	ENSG00000147231	CXorf57	0	0	1	1	0	0	1	1	1	0	1	1	0	0	0	7
	ENSG00000147573	TRIM55	0	0	1	0	1	0	1	0	0	1	0	1	1	1	0	7
	ENSG00000151632	AKR1C2	1	0	1	0	1	0	1	0	1	0	0	1	1	0	0	7
	ENSG00000151689	INPP1	0	0	1	1	0	1	0	1	0	0	0	1	1	0	1	7
	ENSG00000154309	DISP1	1	1	0	1	1	0	1	0	0	1	0	0	1	0	0	7
	ENSG00000154654	NCAM2	1	1	0	0	1	0	0	1	0	0	0	0	1	1	1	7
	ENSG00000155158	TTC39B	1	0	0	1	1	1	0	0	0	0	1	1	0	1	0	7
	ENSG00000163171	CDC42EP3	1	0	1	0	1	0	1	1	0	0	1	1	0	0	0	7
	ENSG00000163631	ALB	1	0	1	0	0	1	1	1	0	0	1	0	0	1	0	7
	ENSG00000164168	TMEM184C	1	0	0	0	1	1	0	0	1	1	1	0	0	1	0	7
	ENSG00000164306	PRIMPOL	0	0	1	0	1	0	0	1	1	0	1	1	1	0	0	7
	ENSG00000164309	CMYA5	0	0	1	0	1	1	0	1	0	1	0	1	1	0	0	7
	ENSG00000164691	TAGAP	0	1	0	1	1	1	0	1	1	0	0	1	0	0	0	7
	ENSG00000166167	BTRC	1	0	0	0	0	0	1	1	1	1	1	0	0	0	1	7
	ENSG00000170381	SEMA3E	0	1	1	1	1	0	1	0	0	1	0	1	0	0	0	7
	ENSG00000170776	AKAP13	0	1	1	1	1	0	0	1	0	1	0	1	0	0	0	7
	ENSG00000176204	LRRTM4	0	0	1	1	1	0	0	0	0	1	0	0	1	1	1	7
	ENSG00000179399	GPC5	1	1	0	1	1	0	1	0	0	0	1	0	0	1	0	7
	ENSG00000179776	CDH5	0	1	1	1	0	0	0	1	0	1	1	0	0	1	0	7
	ENSG00000180871	CXCR2	0	1	1	1	0	1	0	0	0	1	0	1	1	0	0	7
	ENSG00000181031	RPH3AL	1	1	1	0	1	1	0	0	0	1	0	0	0	1	0	7
	ENSG00000182732	RGS6	1	0	1	1	1	0	1	0	0	0	1	1	0	0	0	7
	ENSG00000184999	SLC22A10	0	1	0	1	0	1	0	1	0	1	0	0	0	1	1	7
	ENSG00000188026	RILPL1	0	0	1	1	0	0	0	1	1	1	0	0	1	0	1	7
	ENSG00000196455	PIK3R4	1	0	0	0	0	1	0	1	1	0	1	0	0	1	1	7
	ENSG00000197321	SVIL	0	0	1	1	1	0	0	1	0	1	0	1	1	0	0	7
	ENSG00000197712	FAM114A1	0	0	0	0	1	1	0	1	0	1	0	1	1	1	0	7
	ENSG00000231889	TRAF3IP2-AS1	0	1	1	1	0	0	1	1	1	0	0	1	0	0	0	7
	ENSG00000240602	AADACP1	0	0	1	0	0	1	1	0	1	0	1	1	0	1	0	7
	ENSG00000249948	GBA3	0	0	0	0	1	1	1	0	1	0	0	1	1	1	0	7
	ENSG00000253771	TPTE2P1	1	0	1	0	0	0	1	0	1	0	0	1	1	0	1	7
	ENSG00000265808	SEC22B	1	0	0	0	1	1	0	0	1	1	1	0	0	1	0	7
	ENSG00000006607	FARP2	1	0	0	0	1	1	1	0	1	0	1	0	0	0	0	6
	ENSG00000012223	LTF	0	0	0	0	1	0	1	0	1	1	0	1	1	0	0	6
	ENSG00000021826	CPS1	1	0	1	0	0	1	1	0	1	0	0	0	0	1	0	6
	ENSG00000044459	CNTLN	0	0	1	1	0	1	0	1	1	0	0	0	0	1	0	6
	ENSG00000050438	SLC4A8	1	1	0	0	0	0	1	0	0	0	1	1	0	0	1	6
	ENSG00000050767	COL23A1	0	0	1	0	1	0	1	0	1	0	0	1	1	0	0	6
	ENSG00000064692	SNCAIP	1	0	1	1	0	0	0	1	0	0	1	1	0	0	0	6
	ENSG00000067191	CACNB1	0	1	0	0	1	0	1	0	0	1	0	1	0	0	1	6
	ENSG00000069275	NUCKS1	1	0	0	0	0	0	1	0	1	0	1	1	0	0	1	6
	ENSG00000072110	ACTN1	0	0	1	0	1	0	1	1	0	0	0	1	1	0	0	6
	ENSG00000072858	SIDT1	1	0	0	0	1	0	0	0	1	1	1	0	0	0	1	6
	ENSG00000084453	SLCO1A2	1	0	1	1	0	0	1	0	0	0	0	0	0	1	1	6
	ENSG00000091583	APOH	1	1	0	0	0	1	1	0	0	0	1	0	0	1	0	6
	ENSG00000092621	PHGDH	1	0	0	0	0	1	1	0	0	1	1	0	0	1	0	6
	ENSG00000094841	UPRT	1	1	0	1	0	0	0	0	0	1	1	0	1	0	0	6
	ENSG00000101230	ISM1	0	0	1	0	0	0	1	0	1	1	0	1	0	1	0	6
	ENSG00000102572	STK24	1	0	0	0	1	0	0	0	0	1	0	1	1	0	1	6
	ENSG00000104432	IL7	0	1	1	1	0	1	0	1	1	0	0	0	0	0	0	6
	ENSG00000105339	DENND3	0	1	1	1	1	0	0	1	1	0	0	0	0	0	0	6
	ENSG00000107679	PLEKHA1	0	0	0	1	0	1	1	0	1	0	0	1	0	0	1	6
	ENSG00000110330	BIRC2	0	0	1	0	1	1	1	1	0	0	1	0	0	0	0	6
	ENSG00000111877	MCM9	1	0	0	1	0	0	1	0	1	0	1	1	0	0	0	6
	ENSG00000112981	NME5	1	1	0	1	0	0	1	0	0	1	0	0	1	0	0	6
	ENSG00000113719	ERGIC1	0	1	0	0	1	1	0	0	0	1	0	0	1	1	0	6
	ENSG00000114648	KLHL18	1	1	0	1	0	0	0	0	0	1	0	1	0	0	1	6
	ENSG00000115762	PLEKHB2	1	1	0	1	1	0	0	0	0	0	1	0	0	0	1	6
	ENSG00000117620	SLC35A3	1	0	0	0	1	1	0	0	0	1	1	0	0	1	0	6
	ENSG00000122008	POLK	0	1	1	1	0	0	0	1	0	0	1	1	0	0	0	6
	ENSG00000123191	ATP7B	0	1	0	0	0	1	0	0	1	1	0	0	0	1	1	6
	ENSG00000132388	UBE2G1	1	0	0	0	1	1	0	0	0	1	0	0	1	1	0	6
	ENSG00000133112	TPT1	0	1	1	0	0	1	1	0	0	1	0	0	0	1	0	6
	ENSG00000135678	CPM	1	1	1	1	1	0	1	0	0	0	0	0	0	0	0	6
	ENSG00000136720	HS6ST1	1	0	0	0	1	0	1	0	1	0	1	1	0	0	0	6
	ENSG00000138468	SENP7	0	0	1	0	1	0	1	1	1	0	0	0	1	0	0	6
	ENSG00000138801	PAPSS1	1	1	0	1	0	0	1	0	0	1	1	0	0	0	0	6
	ENSG00000139971	C14orf37	1	0	1	0	0	1	0	0	1	0	1	1	0	0	0	6
	ENSG00000140577	CRTC3	0	1	1	1	0	0	0	1	1	0	0	1	0	0	0	6
	ENSG00000141252	VPS53	1	1	1	1	0	0	0	0	0	1	0	0	0	0	1	6
	ENSG00000141337	ARSG	0	0	0	1	0	0	0	1	1	1	0	1	1	0	0	6
	ENSG00000141665	FBXO15	0	1	0	1	0	1	1	1	1	0	0	0	0	0	0	6
	ENSG00000144847	IGSF11	1	0	0	0	1	0	1	0	0	0	1	1	1	0	0	6
	ENSG00000145348	TBCK	1	1	0	0	0	0	1	0	1	1	0	1	0	0	0	6
	ENSG00000150394	CDH8	0	0	1	0	1	0	0	1	0	0	0	1	1	0	1	6
	ENSG00000151148	UBE3B	1	0	0	0	1	0	0	0	0	1	0	1	1	0	1	6
	ENSG00000152953	STK32B	0	0	0	0	1	0	1	0	1	0	1	1	1	0	0	6
	ENSG00000154645	CHODL	1	0	0	0	1	0	1	0	1	0	1	0	1	0	0	6
	ENSG00000156042	CFAP70	1	1	1	1	0	0	1	0	0	1	0	0	0	0	0	6
	ENSG00000159398	CES5A	0	0	0	0	0	1	1	0	1	0	0	1	0	1	1	6
	ENSG00000162105	SHANK2	1	1	0	1	0	0	0	0	1	0	1	0	0	0	1	6
	ENSG00000162384	C1orf123	0	1	1	0	1	0	1	1	0	0	0	0	1	0	0	6
	ENSG00000163606	CD200R1	0	0	1	0	1	1	0	0	0	1	0	1	1	0	0	6
	ENSG00000164199	ADGRV1	1	0	0	0	1	0	1	0	1	0	1	0	0	1	0	6
	ENSG00000166398	KIAA0355	0	1	1	1	0	0	0	1	0	1	1	0	0	0	0	6
	ENSG00000166741	NNMT	0	1	1	0	0	1	1	0	0	1	0	0	0	1	0	6
	ENSG00000167693	NXN	0	0	0	1	1	0	1	1	0	0	0	1	1	0	0	6
	ENSG00000168038	ULK4	1	1	0	1	0	0	1	1	0	1	0	0	0	0	0	6
	ENSG00000171365	CLCN5	1	0	0	0	0	1	1	0	1	0	1	0	0	1	0	6
	ENSG00000172456	FGGY	0	0	1	0	0	0	1	0	1	1	0	1	0	1	0	6
	ENSG00000173610	UGT2A1	1	0	0	0	0	1	1	0	0	1	1	0	0	1	0	6
	ENSG00000177463	NR2C2	1	1	1	0	1	0	0	1	0	0	0	0	0	0	1	6
	ENSG00000177575	CD163	0	1	1	1	1	1	0	0	0	0	0	0	0	1	0	6
	ENSG00000179818	PCBP1-AS1	0	0	1	0	1	0	1	0	1	1	0	0	1	0	0	6
	ENSG00000182287	AP1S2	0	1	0	1	1	0	0	0	0	1	0	1	1	0	0	6
	ENSG00000183020	AP2A2	1	1	0	0	1	0	1	0	0	0	1	0	0	0	1	6
	ENSG00000183049	CAMK1D	0	0	0	0	1	0	0	0	1	1	0	1	1	0	1	6
	ENSG00000184530	C6orf58	1	0	1	0	0	0	1	0	0	1	0	1	1	0	0	6
	ENSG00000186417	GLDN	0	1	1	1	1	0	0	0	0	0	0	1	0	0	1	6
	ENSG00000187134	AKR1C1	1	0	1	0	1	0	0	0	1	0	0	1	1	0	0	6
	ENSG00000187546	AGMO	0	0	1	0	1	1	1	0	0	0	0	0	1	1	0	6
	ENSG00000196277	GRM7	0	0	1	0	1	0	1	1	1	0	0	0	0	0	1	6
	ENSG00000198722	UNC13B	1	1	0	1	1	0	0	0	0	1	0	0	0	0	1	6
	ENSG00000198964	SGMS1	1	1	0	1	0	1	0	0	0	0	1	0	0	0	1	6
	ENSG00000204120	GIGYF2	1	0	1	0	0	0	0	1	0	1	1	0	0	0	1	6
	ENSG00000243836	WDR86-AS1	0	1	1	0	1	0	1	0	0	1	0	1	0	0	0	6
	ENSG00000245526	LINC00461	1	0	0	0	1	0	1	0	1	0	0	1	1	0	0	6
	ENSG00000260128	ULK4P2	0	1	1	0	1	0	0	1	1	0	0	1	0	0	0	6
	ENSG00000276975	HYDIN2	0	0	1	0	1	0	1	1	0	0	0	1	1	0	0	6
	ENSG00000010017	RANBP9	1	0	0	0	0	0	0	0	0	1	1	0	1	1	0	5
	ENSG00000010278	CD9	1	0	0	1	0	0	0	0	0	1	1	1	0	0	0	5
	ENSG00000010610	CD4	0	1	0	1	1	1	0	0	0	0	0	0	0	1	0	5
	ENSG00000021645	NRXN3	0	0	0	1	1	0	0	0	0	0	0	1	1	0	1	5
	ENSG00000039123	SKIV2L2	0	0	0	0	0	0	0	1	1	1	1	1	0	0	0	5
	ENSG00000044115	CTNNA1	0	1	0	0	1	0	1	0	0	1	0	0	1	0	0	5
	ENSG00000058335	RASGRF1	0	1	0	1	0	0	1	0	0	0	0	1	0	0	1	5
	ENSG00000061676	NCKAP1	1	0	0	0	0	0	0	0	0	0	1	1	1	0	1	5
	ENSG00000065150	IPO5	1	0	1	0	0	0	0	1	0	0	1	1	0	0	0	5
	ENSG00000065833	ME1	0	0	1	0	0	0	0	0	1	0	0	1	1	0	1	5
	ENSG00000067715	SYT1	1	0	0	0	0	0	1	1	0	0	1	0	0	0	1	5
	ENSG00000070214	SLC44A1	1	0	0	0	1	1	0	0	0	0	1	1	0	0	0	5
	ENSG00000072135	PTPN18	0	1	0	0	1	0	1	0	1	1	0	0	0	0	0	5
	ENSG00000075945	KIFAP3	0	0	0	0	1	0	1	0	0	0	1	1	0	0	1	5
	ENSG00000080224	EPHA6	0	0	0	0	1	0	0	1	1	0	0	0	1	0	1	5
	ENSG00000099250	NRP1	0	1	1	0	1	0	1	1	0	0	0	0	0	0	0	5
	ENSG00000100767	PAPLN	0	0	1	0	1	0	1	1	0	0	0	1	0	0	0	5
	ENSG00000103671	TRIP4	1	0	0	0	1	0	0	0	1	0	0	1	1	0	0	5
	ENSG00000103740	ACSBG1	0	1	0	1	1	0	0	0	0	1	0	0	1	0	0	5
	ENSG00000104381	GDAP1	1	0	0	0	0	0	1	1	1	0	0	0	0	0	1	5
	ENSG00000105559	PLEKHA4	0	1	1	1	0	1	1	0	0	0	0	0	0	0	0	5
	ENSG00000106701	FSD1L	1	1	0	1	0	0	0	0	0	1	0	0	0	0	1	5
	ENSG00000114127	XRN1	0	0	1	0	1	1	0	1	1	0	0	0	0	0	0	5
	ENSG00000114331	ACAP2	0	0	1	1	1	0	0	1	0	0	0	1	0	0	0	5
	ENSG00000120903	CHRNA2	0	1	1	1	0	0	0	0	0	0	1	0	0	0	1	5
	ENSG00000121101	TEX14	0	1	0	1	0	0	1	0	1	0	0	0	0	1	0	5
	ENSG00000124772	CPNE5	0	0	0	0	1	0	0	1	0	0	0	1	1	0	1	5
	ENSG00000126777	KTN1	1	0	0	0	1	0	0	0	1	0	1	1	0	0	0	5
	ENSG00000127084	FGD3	1	1	0	1	0	0	0	0	1	0	1	0	0	0	0	5
	ENSG00000129219	PLD2	0	0	1	0	0	0	1	1	0	1	0	0	1	0	0	5
	ENSG00000130703	OSBPL2	1	0	0	0	0	0	0	0	0	1	1	1	0	0	1	5
	ENSG00000131969	ABHD12B	0	0	0	1	0	0	1	0	0	0	1	1	0	0	1	5
	ENSG00000132321	IQCA1	1	0	1	1	0	0	1	0	0	0	0	1	0	0	0	5
	ENSG00000132911	NMUR2	1	0	0	1	0	0	1	0	1	0	1	0	0	0	0	5
	ENSG00000134121	CHL1	1	0	1	0	1	0	0	0	0	1	0	0	1	0	0	5
	ENSG00000135052	GOLM1	1	0	0	0	1	0	0	0	1	0	1	0	1	0	0	5
	ENSG00000135905	DOCK10	0	1	0	0	1	1	0	1	0	0	0	0	0	0	1	5
	ENSG00000136689	IL1RN	0	0	0	0	0	1	0	0	0	1	0	1	1	1	0	5
	ENSG00000138768	USO1	0	0	0	0	0	1	0	1	0	1	1	0	0	1	0	5
	ENSG00000139154	AEBP2	1	0	1	0	0	1	0	1	0	0	0	1	0	0	0	5
	ENSG00000140527	WDR93	0	1	0	1	0	0	1	0	1	1	0	0	0	0	0	5
	ENSG00000140545	MFGE8	0	0	1	0	0	0	1	1	0	0	1	1	0	0	0	5
	ENSG00000143951	WDPCP	0	0	1	1	0	0	1	1	1	0	0	0	0	0	0	5
	ENSG00000145113	MUC4	0	0	1	0	1	0	0	0	0	1	1	1	0	0	0	5
	ENSG00000146416	AIG1	0	0	1	0	0	1	1	0	0	0	0	0	1	1	0	5
	ENSG00000147180	ZNF711	0	0	1	0	0	0	1	1	1	0	0	1	0	0	0	5
	ENSG00000148735	PLEKHS1	1	1	0	0	0	0	1	0	0	1	1	0	0	0	0	5
	ENSG00000148942	SLC5A12	1	0	0	0	0	0	1	0	0	0	1	0	1	1	0	5
	ENSG00000150593	PDCD4	0	0	0	0	1	0	0	1	0	1	0	1	1	0	0	5
	ENSG00000151655	ITIH2	1	1	1	0	0	0	1	0	0	0	0	0	0	1	0	5
	ENSG00000152936	LMNTD1	1	1	0	1	1	0	1	0	0	0	0	0	0	0	0	5
	ENSG00000153558	FBXL2	1	1	0	0	0	0	0	0	1	0	0	1	0	0	1	5
	ENSG00000162341	TPCN2	0	0	0	0	1	0	0	1	1	0	0	1	1	0	0	5
	ENSG00000162402	USP24	1	1	1	0	0	0	1	0	0	0	1	0	0	0	0	5
	ENSG00000162645	GBP2	0	1	1	0	1	0	0	1	0	0	0	1	0	0	0	5
	ENSG00000162761	LMX1A	0	0	1	0	1	0	0	0	1	1	0	0	1	0	0	5
	ENSG00000164808	SPIDR	0	0	0	0	0	1	1	1	0	0	1	0	0	1	0	5
	ENSG00000165806	CASP7	0	0	0	0	1	1	1	0	0	0	1	0	1	0	0	5
	ENSG00000166473	PKD1L2	0	0	1	0	1	0	0	1	0	0	0	1	0	0	1	5
	ENSG00000166747	AP1G1	1	0	0	0	1	1	0	0	0	1	0	0	0	0	1	5
	ENSG00000166913	YWHAB	1	0	0	1	0	0	0	0	0	0	1	1	0	0	1	5
	ENSG00000169302	STK32A	1	0	1	0	1	0	0	0	0	1	0	1	0	0	0	5
	ENSG00000175600	SUGCT	1	0	0	0	1	0	1	0	0	0	1	0	0	1	0	5
	ENSG00000178217	SH2D4B	0	1	0	1	0	0	1	0	1	0	0	0	0	0	1	5
	ENSG00000178234	GALNT11	1	0	1	0	0	0	1	0	0	0	0	0	1	0	1	5
	ENSG00000182185	RAD51B	1	0	1	0	0	0	1	1	0	0	0	1	0	0	0	5
	ENSG00000182621	PLCB1	0	0	1	0	0	0	1	0	0	0	1	1	0	0	1	5
	ENSG00000184613	NELL2	0	0	0	1	1	0	0	1	0	0	0	1	0	0	1	5
	ENSG00000185989	RASA3	0	1	1	1	0	0	0	1	0	0	0	1	0	0	0	5
	ENSG00000186047	DLEU7	0	1	0	1	0	1	0	0	0	0	0	1	0	0	1	5
	ENSG00000186468	RPS23	0	1	1	0	0	0	0	1	0	1	0	0	1	0	0	5
	ENSG00000188452	CERKL	1	1	0	0	0	0	1	0	1	0	1	0	0	0	0	5
	ENSG00000196220	SRGAP3	1	0	0	0	0	0	1	0	0	1	1	0	0	0	1	5
	ENSG00000198929	NOS1AP	1	0	0	0	1	0	0	0	0	0	1	1	0	0	1	5
	ENSG00000223839	FAM95B1	0	0	1	1	1	0	0	0	1	1	0	0	0	0	0	5
	ENSG00000230317	LINC01284	0	1	0	1	0	0	1	0	0	0	1	0	0	0	1	5
	ENSG00000232287	SLC6A1-AS1	0	1	0	0	0	0	0	0	0	1	0	1	0	1	1	5
	ENSG00000264672	SEPT4-AS1	1	0	0	0	0	0	1	0	1	0	1	0	0	1	0	5
	ENSG00000008256	CYTH3	0	1	1	0	0	0	0	1	1	0	0	0	0	0	0	4
	ENSG00000011376	LARS2	1	0	0	0	0	1	0	0	0	1	0	0	0	1	0	4
	ENSG00000013619	MAMLD1	0	1	1	0	0	0	0	1	0	0	0	1	0	0	0	4
	ENSG00000023697	DERA	0	0	0	0	1	1	0	0	0	0	0	1	0	1	0	4
	ENSG00000054793	ATP9A	1	0	1	0	0	0	0	0	0	1	0	0	0	0	1	4
	ENSG00000075151	EIF4G3	1	0	0	0	1	0	0	0	1	0	0	0	0	0	1	4
	ENSG00000090905	TNRC6A	0	0	1	0	0	1	0	1	0	0	0	0	0	1	0	4
	ENSG00000101751	POLI	0	0	1	0	0	0	1	1	1	0	0	0	0	0	0	4
	ENSG00000103091	WDR59	0	0	1	0	0	1	0	0	1	0	0	0	0	1	0	4
	ENSG00000105219	CNTD2	1	0	0	0	0	0	1	0	0	0	1	0	0	1	0	4
	ENSG00000106686	SPATA6L	0	1	0	0	0	1	1	0	0	1	0	0	0	0	0	4
	ENSG00000107262	BAG1	1	0	0	0	1	0	0	0	0	1	1	0	0	0	0	4
	ENSG00000107651	SEC23IP	1	0	0	0	0	1	0	0	1	0	1	0	0	0	0	4
	ENSG00000110324	IL10RA	0	1	0	1	1	1	0	0	0	0	0	0	0	0	0	4
	ENSG00000114054	PCCB	1	0	0	0	0	1	0	0	0	0	1	0	0	1	0	4
	ENSG00000116785	CFHR3	0	0	0	0	0	1	1	0	0	0	0	1	0	1	0	4
	ENSG00000117971	CHRNB4	1	0	0	0	1	0	0	0	0	0	0	1	1	0	0	4
	ENSG00000119125	GDA	0	0	1	0	1	1	0	0	0	0	0	0	0	0	1	4
	ENSG00000124749	COL21A1	0	0	1	0	1	0	0	0	0	0	0	1	1	0	0	4
	ENSG00000128656	CHN1	0	1	0	1	0	0	0	0	0	0	0	1	0	0	1	4
	ENSG00000132466	ANKRD17	1	0	0	0	0	1	0	0	1	0	1	0	0	0	0	4
	ENSG00000133019	CHRM3	0	0	0	1	0	0	0	0	0	0	1	0	1	0	1	4
	ENSG00000135931	ARMC9	1	1	0	0	0	0	1	1	0	0	0	0	0	0	0	4
	ENSG00000135976	ANKRD36	0	0	1	0	0	0	0	1	1	0	0	0	0	0	1	4
	ENSG00000136068	FLNB	1	0	0	0	1	0	0	0	1	0	1	0	0	0	0	4
	ENSG00000141968	VAV1	0	1	0	0	1	1	0	0	0	0	0	1	0	0	0	4
	ENSG00000143970	ASXL2	1	0	1	0	0	0	0	1	0	0	0	1	0	0	0	4
	ENSG00000145431	PDGFC	0	0	1	0	0	1	0	1	0	0	0	1	0	0	0	4
	ENSG00000146350	TBC1D32	1	0	0	0	0	0	1	0	1	0	1	0	0	0	0	4
	ENSG00000147676	MAL2	1	0	0	0	0	0	1	0	0	1	0	0	0	0	1	4
	ENSG00000147996	CBWD5	0	0	0	0	0	1	1	0	1	0	0	0	0	1	0	4
	ENSG00000152457	DCLRE1C	0	0	0	0	0	0	1	0	1	1	0	1	0	0	0	4
	ENSG00000152558	TMEM123	0	0	0	0	0	1	0	1	1	0	0	0	0	1	0	4
	ENSG00000154928	EPHB1	0	0	1	0	0	1	0	0	1	0	0	1	0	0	0	4
	ENSG00000155111	CDK19	0	0	0	0	1	0	1	0	0	1	0	0	0	0	1	4
	ENSG00000157106	SMG1	0	0	0	0	0	1	0	1	1	0	0	0	0	0	1	4
	ENSG00000157578	LCA5L	0	1	0	0	0	0	1	0	1	1	0	0	0	0	0	4
	ENSG00000159496	RGL4	0	1	0	0	1	0	0	0	1	0	0	0	1	0	0	4
	ENSG00000159882	ZNF230	0	0	0	1	0	0	0	1	1	0	0	1	0	0	0	4
	ENSG00000162782	TDRD5	1	0	0	0	0	0	0	0	1	0	1	0	0	0	1	4
	ENSG00000162814	SPATA17	1	1	0	1	0	0	0	0	1	0	0	0	0	0	0	4
	ENSG00000163785	RYK	1	0	1	0	0	0	0	1	0	0	0	1	0	0	0	4
	ENSG00000164659	KIAA1324L	0	1	0	1	0	0	0	0	1	0	0	0	0	0	1	4
	ENSG00000165591	FAAH2	1	0	0	0	0	1	0	0	0	1	1	0	0	0	0	4
	ENSG00000165637	VDAC2	1	0	0	0	1	0	0	0	0	1	0	0	1	0	0	4
	ENSG00000166233	ARIH1	0	0	1	0	0	0	0	1	0	0	0	1	0	0	1	4
	ENSG00000166415	WDR72	1	0	0	0	0	1	0	0	1	0	1	0	0	0	0	4
	ENSG00000166479	TMX3	0	1	1	1	0	0	0	1	0	0	0	0	0	0	0	4
	ENSG00000166527	CLEC4D	0	1	0	1	0	1	1	0	0	0	0	0	0	0	0	4
	ENSG00000166689	PLEKHA7	1	0	1	0	1	0	0	0	0	1	0	0	0	0	0	4
	ENSG00000170074	FAM153A	0	0	1	0	1	0	0	1	0	0	0	0	0	0	1	4
	ENSG00000172264	MACROD2	0	1	0	1	0	0	0	0	0	0	0	1	0	0	1	4
	ENSG00000172292	CERS6	1	0	0	0	0	0	0	0	0	0	1	1	0	0	1	4
	ENSG00000173638	SLC19A1	0	1	0	1	0	0	0	0	1	0	0	0	0	1	0	4
	ENSG00000174501	ANKRD36C	0	0	1	0	0	0	0	0	1	1	0	0	0	0	1	4
	ENSG00000177182	CLVS1	0	0	1	0	0	0	0	0	1	1	0	1	0	0	0	4
	ENSG00000178950	GAK	1	0	0	0	1	0	0	0	0	1	0	0	0	0	1	4
	ENSG00000183281	PLGLB1	0	0	1	0	0	1	1	0	0	0	0	0	0	1	0	4
	ENSG00000184203	PPP1R2	1	0	0	0	0	0	1	1	0	0	0	1	0	0	0	4
	ENSG00000196344	ADH7	0	0	0	0	0	0	0	0	0	1	0	1	1	1	0	4
	ENSG00000197323	TRIM33	1	0	0	0	0	0	0	0	0	1	1	0	0	0	1	4
	ENSG00000197410	DCHS2	0	0	1	0	1	0	0	0	0	0	0	1	1	0	0	4
	ENSG00000204020	LIPN	0	1	1	1	0	1	0	0	0	0	0	0	0	0	0	4
	ENSG00000204852	TCTN1	0	1	0	0	0	0	1	0	1	0	0	0	1	0	0	4
	ENSG00000226891	LINC01359	0	1	1	1	0	0	0	1	0	0	0	0	0	0	0	4
	ENSG00000228376	GAS2L1P2	1	0	0	0	0	0	1	0	1	0	1	0	0	0	0	4
	ENSG00000236922	LINC01378	1	0	0	0	0	0	1	0	0	0	1	0	0	0	1	4
	ENSG00000241973	PI4KA	1	0	0	0	1	0	0	0	0	0	1	0	0	0	1	4
	ENSG00000256294	ZNF225	0	0	1	0	1	0	0	1	1	0	0	0	0	0	0	4
	ENSG00000275450	PTGER4P2-CDK2AP2P2	1	0	0	1	0	0	0	0	1	0	0	1	0	0	0	4
	ENSG00000277586	NEFL	0	0	0	0	1	0	0	0	0	0	0	1	1	0	1	4
	ENSG00000002822	MAD1L1	0	0	0	1	0	0	1	0	1	0	0	0	0	0	0	3
	ENSG00000011677	GABRA3	0	0	0	0	0	0	1	0	0	0	0	1	0	0	1	3
	ENSG00000039139	DNAH5	1	1	0	0	0	0	1	0	0	0	0	0	0	0	0	3
	ENSG00000041982	TNC	1	0	0	0	0	0	1	0	0	0	0	1	0	0	0	3
	ENSG00000053108	FSTL4	1	0	0	0	0	0	0	0	0	0	1	0	0	0	1	3
	ENSG00000069493	CLEC2D	0	0	0	0	1	0	0	1	1	0	0	0	0	0	0	3
	ENSG00000070081	NUCB2	0	0	0	0	0	0	0	0	1	1	0	0	1	0	0	3
	ENSG00000070367	EXOC5	0	0	0	0	0	1	0	0	0	0	1	1	0	0	0	3
	ENSG00000074211	PPP2R2C	0	0	0	0	0	0	0	1	0	0	0	0	1	0	1	3
	ENSG00000074657	ZNF532	0	0	1	0	0	0	0	1	0	0	0	1	0	0	0	3
	ENSG00000075292	ZNF638	0	0	0	0	0	0	1	0	0	0	0	0	0	1	1	3
	ENSG00000079974	RABL2B	0	0	0	1	0	0	1	0	1	0	0	0	0	0	0	3
	ENSG00000082196	C1QTNF3	0	0	0	0	1	0	1	0	0	0	0	0	1	0	0	3
	ENSG00000082701	GSK3B	1	0	0	1	0	0	0	0	0	0	0	0	0	0	1	3
	ENSG00000086102	NFX1	0	0	0	0	0	1	0	1	0	1	0	0	0	0	0	3
	ENSG00000092108	SCFD1	0	0	0	0	1	0	0	0	1	0	1	0	0	0	0	3
	ENSG00000092140	G2E3	1	0	0	0	0	0	0	0	1	0	1	0	0	0	0	3
	ENSG00000100644	HIF1A	1	0	0	0	0	0	1	0	0	0	0	1	0	0	0	3
	ENSG00000101152	DNAJC5	1	0	0	0	0	0	0	0	0	0	0	0	1	0	1	3
	ENSG00000101363	MANBAL	0	0	0	0	0	0	0	1	0	0	0	1	1	0	0	3
	ENSG00000104218	CSPP1	1	1	0	0	0	0	0	0	1	0	0	0	0	0	0	3
	ENSG00000104321	TRPA1	0	0	0	0	1	0	1	0	0	0	0	1	0	0	0	3
	ENSG00000104375	STK3	1	0	0	0	0	0	0	1	0	0	1	0	0	0	0	3
	ENSG00000104723	TUSC3	1	0	0	0	1	0	1	0	0	0	0	0	0	0	0	3
	ENSG00000105825	TFPI2	0	0	1	0	0	1	1	0	0	0	0	0	0	0	0	3
	ENSG00000106536	POU6F2	0	0	0	0	0	1	1	0	0	0	0	0	0	0	1	3
	ENSG00000107201	DDX58	0	0	0	0	1	1	1	0	0	0	0	0	0	0	0	3
	ENSG00000108055	SMC3	0	0	0	0	0	0	0	1	0	0	1	1	0	0	0	3
	ENSG00000109452	INPP4B	0	0	0	0	0	0	0	1	0	0	1	0	0	0	1	3
	ENSG00000110063	DCPS	1	0	0	0	0	0	0	0	0	0	1	0	0	1	0	3
	ENSG00000112299	VNN1	0	0	0	0	0	1	1	0	0	0	0	0	0	1	0	3
	ENSG00000113048	MRPS27	0	0	1	0	0	0	0	0	0	1	0	1	0	0	0	3
	ENSG00000113522	RAD50	0	0	0	0	0	0	0	0	0	1	0	0	1	0	1	3
	ENSG00000113600	C9	0	0	0	0	0	1	0	0	0	0	1	0	0	1	0	3
	ENSG00000115459	ELMOD3	0	0	1	0	1	0	0	0	0	0	0	0	1	0	0	3
	ENSG00000115919	KYNU	0	0	0	0	0	1	0	0	0	0	1	0	0	1	0	3
	ENSG00000116127	ALMS1	0	0	0	0	0	0	0	1	1	0	0	1	0	0	0	3
	ENSG00000116497	S100PBP	0	0	0	0	0	0	1	1	0	0	0	1	0	0	0	3
	ENSG00000118873	RAB3GAP2	1	0	0	0	0	0	0	0	0	0	1	1	0	0	0	3
	ENSG00000120370	GORAB	0	0	0	0	1	0	1	0	0	0	0	1	0	0	0	3
	ENSG00000124789	NUP153	0	0	0	0	0	0	0	0	1	0	1	1	0	0	0	3
	ENSG00000125551	PLGLB2	0	0	0	0	0	1	0	0	1	0	0	0	0	1	0	3
	ENSG00000127527	EPS15L1	0	0	0	0	0	0	0	0	0	0	0	1	1	0	1	3
	ENSG00000131368	MRPS25	1	0	0	0	0	0	0	0	0	0	0	0	0	1	1	3
	ENSG00000131697	NPHP4	0	1	0	0	0	0	1	0	0	0	0	0	0	0	1	3
	ENSG00000132912	DCTN4	0	1	0	1	0	0	0	1	0	0	0	0	0	0	0	3
	ENSG00000134061	CD180	0	0	0	0	1	1	0	0	1	0	0	0	0	0	0	3
	ENSG00000134759	ELP2	0	0	0	0	0	1	0	1	0	0	0	0	0	1	0	3
	ENSG00000136250	AOAH	0	0	0	1	0	1	0	0	1	0	0	0	0	0	0	3
	ENSG00000137251	TINAG	0	0	0	0	1	0	1	0	0	0	0	0	0	0	1	3
	ENSG00000137513	NARS2	1	0	0	0	0	0	1	0	0	0	0	0	0	1	0	3
	ENSG00000138777	PPA2	1	0	0	0	0	1	0	0	0	1	0	0	0	0	0	3
	ENSG00000140379	BCL2A1	0	1	0	1	0	0	0	0	1	0	0	0	0	0	0	3
	ENSG00000143297	FCRL5	0	0	0	0	1	0	1	0	0	0	0	0	1	0	0	3
	ENSG00000144736	SHQ1	1	0	0	0	0	0	0	0	1	1	0	0	0	0	0	3
	ENSG00000147854	UHRF2	0	0	0	0	0	0	0	1	1	0	0	1	0	0	0	3
	ENSG00000148396	SEC16A	1	0	0	0	0	0	0	0	0	0	1	0	0	1	0	3
	ENSG00000148832	PAOX	0	0	0	0	0	0	0	0	0	0	0	0	1	1	1	3
	ENSG00000150722	PPP1R1C	1	0	0	0	0	1	0	0	0	0	0	1	0	0	0	3
	ENSG00000151812	SLC35F4	0	0	0	0	0	0	0	1	1	0	0	1	0	0	0	3
	ENSG00000152503	TRIM36	0	1	0	0	1	0	0	0	0	0	0	0	0	0	1	3
	ENSG00000153283	CD96	0	1	0	0	1	0	0	0	1	0	0	0	0	0	0	3
	ENSG00000153922	CHD1	0	1	0	0	0	1	0	1	0	0	0	0	0	0	0	3
	ENSG00000154589	LY96	0	1	0	0	1	0	0	1	0	0	0	0	0	0	0	3
	ENSG00000154743	TSEN2	1	0	0	0	0	0	0	0	1	1	0	0	0	0	0	3
	ENSG00000155761	SPAG17	0	0	0	0	0	0	1	0	0	1	0	0	1	0	0	3
	ENSG00000156500	FAM122C	0	1	1	0	0	0	0	1	0	0	0	0	0	0	0	3
	ENSG00000156931	VPS8	0	0	0	0	1	0	0	0	1	0	0	0	0	0	1	3
	ENSG00000156958	GALK2	1	0	0	0	0	0	0	0	1	0	1	0	0	0	0	3
	ENSG00000158092	NCK1	0	0	1	0	1	0	0	1	0	0	0	0	0	0	0	3
	ENSG00000161082	CELF5	0	0	1	0	0	0	0	1	0	0	0	0	0	0	1	3
	ENSG00000162819	BROX	1	0	0	0	0	0	1	0	0	1	0	0	0	0	0	3
	ENSG00000164051	CCDC51	1	0	0	0	0	0	1	0	1	0	0	0	0	0	0	3
	ENSG00000164304	CAGE1	1	0	0	0	0	0	1	0	1	0	0	0	0	0	0	3
	ENSG00000164796	CSMD3	0	0	0	0	0	0	0	1	0	0	1	0	0	0	1	3
	ENSG00000167508	MVD	0	0	0	0	0	0	0	0	0	0	0	0	1	1	1	3
	ENSG00000167632	TRAPPC9	1	0	0	0	0	0	0	0	0	1	0	0	0	0	1	3
	ENSG00000167657	DAPK3	0	0	0	1	0	0	0	1	0	0	0	0	1	0	0	3
	ENSG00000168843	FSTL5	0	0	0	0	0	0	1	0	1	0	0	0	0	0	1	3
	ENSG00000171502	COL24A1	0	0	0	0	0	0	0	0	0	0	1	1	0	0	1	3
	ENSG00000173726	TOMM20	0	0	0	0	0	0	1	0	0	0	1	0	0	0	1	3
	ENSG00000178081	ULK4P3	0	0	1	0	0	0	0	0	1	0	0	1	0	0	0	3
	ENSG00000183960	KCNH8	0	0	1	0	0	0	0	0	1	0	0	0	0	0	1	3
	ENSG00000184319	RPL23AP82	0	0	0	0	0	0	0	1	0	0	0	1	1	0	0	3
	ENSG00000185009	AP3M1	1	0	0	0	0	0	1	0	0	0	1	0	0	0	0	3
	ENSG00000185186	LINC00313	0	0	0	0	0	0	0	1	0	0	0	1	0	1	0	3
	ENSG00000186973	FAM183A	0	1	0	1	0	0	1	0	0	0	0	0	0	0	0	3
	ENSG00000188092	GPR89B	1	0	0	0	0	0	1	0	0	0	1	0	0	0	0	3
	ENSG00000188352	FOCAD	1	0	0	0	0	0	0	0	0	1	0	0	0	0	1	3
	ENSG00000196396	PTPN1	0	1	0	1	0	0	0	0	1	0	0	0	0	0	0	3
	ENSG00000196712	NF1	1	0	0	0	0	0	0	0	0	0	0	1	0	0	1	3
	ENSG00000196954	CASP4	0	1	1	0	0	1	0	0	0	0	0	0	0	0	0	3
	ENSG00000198088	NUP62CL	1	0	0	0	0	0	1	0	1	0	0	0	0	0	0	3
	ENSG00000198799	LRIG2	0	0	1	0	0	0	0	1	1	0	0	0	0	0	0	3
	ENSG00000203780	FANK1	0	1	0	0	0	0	1	0	0	1	0	0	0	0	0	3
	ENSG00000204634	TBC1D8	0	0	0	0	0	0	1	0	1	1	0	0	0	0	0	3
	ENSG00000205549	C9orf92	0	0	0	0	0	0	1	1	1	0	0	0	0	0	0	3
	ENSG00000212766	EWSAT1	1	0	0	0	0	0	1	0	0	0	1	0	0	0	0	3
	ENSG00000215271	HOMEZ	1	0	0	0	0	0	0	0	0	0	1	0	1	0	0	3
	ENSG00000221914	PPP2R2A	0	0	0	0	0	1	0	0	0	1	1	0	0	0	0	3
	ENSG00000225492	GBP1P1	0	0	0	0	0	0	1	0	1	0	0	1	0	0	0	3
	ENSG00000226742	HSBP1L1	0	1	0	0	1	0	0	0	0	0	0	0	0	1	0	3
	ENSG00000227028	SLC8A1-AS1	0	0	0	0	0	0	1	0	1	1	0	0	0	0	0	3
	ENSG00000227110	LMCD1-AS1	1	0	0	0	0	0	1	0	0	0	0	1	0	0	0	3
	ENSG00000228824	MIR4500HG	0	0	0	0	0	0	0	1	1	0	0	0	0	0	1	3
	ENSG00000230006	ANKRD36BP2	0	0	0	0	1	0	0	0	0	0	0	0	1	0	1	3
	ENSG00000234377	RNF219-AS1	0	1	0	1	0	0	1	0	0	0	0	0	0	0	0	3
	ENSG00000239264	TXNDC5	0	0	0	0	0	0	1	0	1	0	0	0	1	0	0	3
	ENSG00000248663	LINC00992	0	0	0	0	1	0	0	0	1	0	0	0	0	0	1	3
	ENSG00000250251	PKD1P6	0	0	1	0	0	0	0	1	1	0	0	0	0	0	0	3
	ENSG00000255145	STX17-AS1	1	0	0	0	0	0	0	0	0	1	0	0	1	0	0	3
	ENSG00000255819	KLRC4-KLRK1	0	1	0	0	1	0	0	0	1	0	0	0	0	0	0	3
	ENSG00000256574	OR13A1	0	0	0	0	0	0	1	0	0	1	0	0	0	0	1	3
	ENSG00000257621	PSMA3-AS1	0	1	1	0	0	0	0	1	0	0	0	0	0	0	0	3
	ENSG00000004975	DVL2	0	0	0	0	0	0	0	1	0	0	0	1	0	0	0	2
	ENSG00000010165	METTL13	1	0	0	0	0	0	1	0	0	0	0	0	0	0	0	2
	ENSG00000011143	MKS1	0	0	0	0	0	0	1	0	1	0	0	0	0	0	0	2
	ENSG00000011275	RNF216	0	0	0	0	0	0	0	1	0	0	0	1	0	0	0	2
	ENSG00000018510	AGPS	0	0	0	0	0	0	1	0	0	0	0	1	0	0	0	2
	ENSG00000033170	FUT8	0	0	0	0	0	0	0	0	0	0	0	1	0	0	1	2
	ENSG00000042980	ADAM28	0	0	0	0	1	0	0	0	0	0	0	1	0	0	0	2
	ENSG00000065923	SLC9A7	1	0	0	0	0	0	0	0	0	0	0	0	0	0	1	2
	ENSG00000072609	CHFR	0	0	0	0	1	0	0	0	0	0	0	0	1	0	0	2
	ENSG00000084073	ZMPSTE24	1	0	0	0	0	0	0	0	0	0	1	0	0	0	0	2
	ENSG00000092931	MFSD11	0	0	0	0	1	0	1	0	0	0	0	0	0	0	0	2
	ENSG00000094916	CBX5	1	0	0	0	0	0	0	0	0	0	0	1	0	0	0	2
	ENSG00000100483	VCPKMT	0	0	0	0	0	0	1	0	0	0	0	0	0	0	1	2
	ENSG00000101842	VSIG1	0	0	0	0	0	0	1	0	0	0	0	0	1	0	0	2
	ENSG00000102225	CDK16	1	0	0	0	0	0	0	0	0	0	0	0	0	0	1	2
	ENSG00000103197	TSC2	0	0	0	0	0	0	0	0	0	0	0	0	1	0	1	2
	ENSG00000105877	DNAH11	0	1	0	0	0	0	0	0	0	0	0	0	1	0	0	2
	ENSG00000105976	MET	0	0	1	0	0	0	0	0	0	0	0	1	0	0	0	2
	ENSG00000106302	HYAL4	0	0	0	0	0	0	0	0	0	1	1	0	0	0	0	2
	ENSG00000109111	SUPT6H	0	0	0	0	0	0	0	0	0	0	0	1	0	0	1	2
	ENSG00000112290	WASF1	0	0	0	0	0	0	0	0	0	0	0	0	1	0	1	2
	ENSG00000113327	GABRG2	0	0	0	0	1	0	0	0	0	0	0	0	0	0	1	2
	ENSG00000113845	TIMMDC1	1	0	0	0	0	0	0	0	1	0	0	0	0	0	0	2
	ENSG00000113971	NPHP3	0	0	1	0	0	0	0	1	0	0	0	0	0	0	0	2
	ENSG00000114374	USP9Y	0	0	1	0	0	0	0	0	0	0	1	0	0	0	0	2
	ENSG00000115239	ASB3	0	0	0	0	0	0	0	1	0	0	0	1	0	0	0	2
	ENSG00000116793	PHTF1	1	1	0	0	0	0	0	0	0	0	0	0	0	0	0	2
	ENSG00000117262	GPR89A	0	0	0	0	0	0	1	0	0	0	1	0	0	0	0	2
	ENSG00000117906	RCN2	1	0	0	0	0	0	0	0	0	0	1	0	0	0	0	2
	ENSG00000119725	ZNF410	0	0	1	0	0	0	0	0	1	0	0	0	0	0	0	2
	ENSG00000120498	TEX11	0	0	0	0	1	0	1	0	0	0	0	0	0	0	0	2
	ENSG00000121039	RDH10	1	0	0	0	0	0	0	0	0	0	1	0	0	0	0	2
	ENSG00000122966	CIT	0	0	0	0	0	0	0	0	0	0	1	0	0	0	1	2
	ENSG00000122970	IFT81	0	0	0	0	0	0	1	0	0	0	0	1	0	0	0	2
	ENSG00000124783	SSR1	0	0	0	0	0	0	1	0	1	0	0	0	0	0	0	2
	ENSG00000128276	RFPL3	0	1	0	1	0	0	0	0	0	0	0	0	0	0	0	2
	ENSG00000131149	GSE1	0	1	0	0	0	0	0	0	0	1	0	0	0	0	0	2
	ENSG00000131558	EXOC4	0	0	0	0	0	0	0	0	0	1	0	1	0	0	0	2
	ENSG00000131951	LRRC9	0	0	0	0	0	0	0	0	1	0	1	0	0	0	0	2
	ENSG00000132429	POPDC3	0	0	0	0	1	0	0	0	0	0	0	0	0	0	1	2
	ENSG00000132958	TPTE2	0	0	0	0	0	0	1	0	0	0	0	1	0	0	0	2
	ENSG00000134242	PTPN22	0	1	0	0	1	0	0	0	0	0	0	0	0	0	0	2
	ENSG00000135094	SDS	0	0	0	0	0	0	0	0	1	0	0	0	0	1	0	2
	ENSG00000136628	EPRS	0	0	0	0	0	0	0	0	0	1	1	0	0	0	0	2
	ENSG00000136715	SAP130	0	0	0	0	1	0	0	0	1	0	0	0	0	0	0	2
	ENSG00000137200	CMTR1	0	0	0	0	0	0	1	0	1	0	0	0	0	0	0	2
	ENSG00000138829	FBN2	0	0	0	0	0	0	1	0	0	0	0	1	0	0	0	2
	ENSG00000139173	TMEM117	0	0	1	0	0	0	0	0	0	0	0	1	0	0	0	2
	ENSG00000139631	CSAD	0	0	0	0	0	1	0	0	0	0	0	0	0	1	0	2
	ENSG00000143184	XCL1	0	0	0	0	1	0	0	0	1	0	0	0	0	0	0	2
	ENSG00000143624	INTS3	0	0	0	0	0	0	1	0	1	0	0	0	0	0	0	2
	ENSG00000144161	ZC3H8	0	0	0	0	0	0	0	0	1	0	0	0	0	0	1	2
	ENSG00000144744	UBA3	1	0	0	0	0	0	0	0	0	1	0	0	0	0	0	2
	ENSG00000146276	GABRR1	0	0	1	0	0	0	0	0	0	0	1	0	0	0	0	2
	ENSG00000148834	GSTO1	0	0	0	1	0	0	0	0	0	0	0	0	0	1	0	2
	ENSG00000151575	TEX9	0	0	0	0	0	0	1	0	0	1	0	0	0	0	0	2
	ENSG00000152128	TMEM163	0	1	1	0	0	0	0	0	0	0	0	0	0	0	0	2
	ENSG00000152430	BOLL	1	0	0	0	0	0	0	0	0	1	0	0	0	0	0	2
	ENSG00000153046	CDYL	1	0	0	0	0	0	0	0	0	0	0	1	0	0	0	2
	ENSG00000157741	UBN2	0	0	0	0	0	0	0	0	1	1	0	0	0	0	0	2
	ENSG00000157890	MEGF11	0	1	0	0	0	0	1	0	0	0	0	0	0	0	0	2
	ENSG00000159579	RSPRY1	0	0	0	0	0	1	0	0	0	0	0	1	0	0	0	2
	ENSG00000159685	CHCHD6	0	0	0	1	0	0	0	0	0	0	0	0	0	0	1	2
	ENSG00000161551	ZNF577	0	0	1	0	0	0	0	1	0	0	0	0	0	0	0	2
	ENSG00000163689	C3orf67	0	0	0	0	0	0	1	0	0	0	0	0	1	0	0	2
	ENSG00000163913	IFT122	0	0	0	1	0	0	1	0	0	0	0	0	0	0	0	2
	ENSG00000164649	CDCA7L	0	0	0	0	0	0	0	0	1	0	0	1	0	0	0	2
	ENSG00000164754	RAD21	1	0	0	0	0	0	0	0	1	0	0	0	0	0	0	2
	ENSG00000164828	SUN1	0	0	1	0	0	0	0	1	0	0	0	0	0	0	0	2
	ENSG00000166446	CDYL2	0	0	0	0	0	0	0	0	0	0	1	0	0	0	1	2
	ENSG00000169398	PTK2	0	0	0	0	0	0	0	0	0	0	1	0	0	0	1	2
	ENSG00000170927	PKHD1	1	0	0	0	0	0	1	0	0	0	0	0	0	0	0	2
	ENSG00000171084	FAM86JP	1	0	0	0	0	0	0	0	1	0	0	0	0	0	0	2
	ENSG00000171195	MUC7	0	0	1	0	0	0	0	0	0	1	0	0	0	0	0	2
	ENSG00000172785	CBWD1	0	0	0	1	0	0	0	0	0	0	1	0	0	0	0	2
	ENSG00000174469	CNTNAP2	1	0	0	0	0	0	0	0	0	0	0	0	0	0	1	2
	ENSG00000174564	IL20RB	0	0	0	0	0	0	0	0	0	0	0	1	1	0	0	2
	ENSG00000180438	TPRXL	0	0	0	0	0	0	1	0	0	0	0	1	0	0	0	2
	ENSG00000181827	RFX7	0	0	0	0	0	0	0	0	1	0	0	1	0	0	0	2
	ENSG00000182230	FAM153B	0	0	0	0	0	0	0	1	0	0	0	0	0	0	1	2
	ENSG00000183019	MCEMP1	0	1	0	1	0	0	0	0	0	0	0	0	0	0	0	2
	ENSG00000183495	EP400	0	0	1	0	0	0	0	0	0	0	0	0	0	0	1	2
	ENSG00000183625	CCR3	0	0	0	0	1	0	0	0	0	0	0	1	0	0	0	2
	ENSG00000184368	MAP7D2	0	0	0	0	0	0	1	0	0	0	0	0	0	0	1	2
	ENSG00000185024	BRF1	0	0	0	0	0	0	0	0	0	0	1	0	0	0	1	2
	ENSG00000185104	FAF1	1	0	0	0	0	0	0	0	0	1	0	0	0	0	0	2
	ENSG00000185304	RGPD2	0	0	0	0	0	1	0	0	1	0	0	0	0	0	0	2
	ENSG00000186141	POLR3C	0	0	0	0	0	0	1	0	0	0	0	1	0	0	0	2
	ENSG00000186416	NKRF	1	0	0	0	0	0	0	0	0	0	0	0	0	0	1	2
	ENSG00000187118	CMC1	1	0	0	0	0	0	0	0	0	0	0	0	0	1	0	2
	ENSG00000189007	ADAT2	0	0	1	0	0	0	0	0	1	0	0	0	0	0	0	2
	ENSG00000196126	HLA-DRB1	0	1	0	1	0	0	0	0	0	0	0	0	0	0	0	2
	ENSG00000196505	GDAP2	1	0	0	0	0	1	0	0	0	0	0	0	0	0	0	2
	ENSG00000196912	ANKRD36B	0	0	1	0	0	0	0	0	0	0	0	0	0	0	1	2
	ENSG00000196950	SLC39A10	0	0	0	0	0	0	1	0	0	0	0	0	0	0	1	2
	ENSG00000197927	C2orf27A	0	0	0	0	0	0	1	1	0	0	0	0	0	0	0	2
	ENSG00000203724	C1orf53	1	0	0	0	0	0	0	0	0	0	0	0	0	1	0	2
	ENSG00000203785	SPRR2E	0	0	0	0	0	0	0	0	0	1	0	0	1	0	0	2
	ENSG00000205266	KRT17P5	0	0	0	0	0	0	0	0	0	1	0	0	0	1	0	2
	ENSG00000205629	LCMT1	0	0	0	0	1	0	0	0	0	0	0	0	0	0	1	2
	ENSG00000213809	KLRK1	0	0	0	0	0	0	0	1	1	0	0	0	0	0	0	2
	ENSG00000214226	C17orf67	0	0	0	0	0	0	0	0	1	0	0	1	0	0	0	2
	ENSG00000226397	C12orf77	0	0	0	0	1	0	0	0	1	0	0	0	0	0	0	2
	ENSG00000229391	HLA-DRB6	0	1	0	1	0	0	0	0	0	0	0	0	0	0	0	2
	ENSG00000230020	NHS-AS1	0	0	0	0	0	0	1	0	1	0	0	0	0	0	0	2
	ENSG00000230438	SERPINB9P1	0	1	0	0	0	0	0	0	0	1	0	0	0	0	0	2
	ENSG00000231749	ABCA9-AS1	0	0	1	0	0	0	0	0	1	0	0	0	0	0	0	2
	ENSG00000234661	CHL1-AS1	1	0	1	0	0	0	0	0	0	0	0	0	0	0	0	2
	ENSG00000236242	MYO16-AS1	0	1	0	1	0	0	0	0	0	0	0	0	0	0	0	2
	ENSG00000255282	WTAPP1	1	0	0	0	0	0	0	0	0	0	1	0	0	0	0	2
	ENSG00000261279	ULK4P1	0	0	1	0	0	0	0	0	1	0	0	0	0	0	0	2
	ENSG00000263878	DLGAP1-AS4	0	0	0	0	0	0	0	0	0	0	0	1	0	0	1	2
	ENSG00000270011	ZNF559-ZNF177	0	0	1	0	0	0	0	1	0	0	0	0	0	0	0	2
	ENSG00000278540	ACACA	1	0	0	0	0	0	0	0	0	0	0	0	0	0	1	2
	ENSG00000026297	RNASET2	0	0	0	0	0	0	0	0	1	0	0	0	0	0	0	1
	ENSG00000047621	C12orf4	0	0	0	0	0	0	0	0	0	0	0	1	0	0	0	1
	ENSG00000067704	IARS2	1	0	0	0	0	0	0	0	0	0	0	0	0	0	0	1
	ENSG00000068654	POLR1A	1	0	0	0	0	0	0	0	0	0	0	0	0	0	0	1
	ENSG00000070501	POLB	0	0	0	0	0	0	1	0	0	0	0	0	0	0	0	1
	ENSG00000075914	EXOSC7	1	0	0	0	0	0	0	0	0	0	0	0	0	0	0	1
	ENSG00000082126	MPP4	0	0	0	0	0	0	0	0	1	0	0	0	0	0	0	1
	ENSG00000089154	GCN1	1	0	0	0	0	0	0	0	0	0	0	0	0	0	0	1
	ENSG00000100084	HIRA	0	0	0	0	0	0	0	0	1	0	0	0	0	0	0	1
	ENSG00000100578	KIAA0586	0	0	0	0	0	0	0	0	0	0	1	0	0	0	0	1
	ENSG00000100749	VRK1	0	0	0	0	0	0	0	0	1	0	0	0	0	0	0	1
	ENSG00000101104	PABPC1L	0	0	0	0	0	0	1	0	0	0	0	0	0	0	0	1
	ENSG00000101986	ABCD1	0	0	0	0	0	0	0	0	0	0	0	1	0	0	0	1
	ENSG00000102978	POLR2C	0	0	0	0	0	0	0	0	0	0	0	1	0	0	0	1
	ENSG00000103121	CMC2	0	0	0	0	0	0	0	0	0	0	0	0	0	1	0	1
	ENSG00000103995	CEP152	0	0	0	0	0	0	0	0	1	0	0	0	0	0	0	1
	ENSG00000104518	GSDMD	0	0	0	0	0	0	1	0	0	0	0	0	0	0	0	1
	ENSG00000104626	ERI1	0	0	0	0	0	0	0	0	0	0	0	1	0	0	0	1
	ENSG00000106346	USP42	0	0	0	0	0	0	0	0	1	0	0	0	0	0	0	1
	ENSG00000109684	CLNK	0	0	0	0	0	0	0	0	0	0	1	0	0	0	0	1
	ENSG00000112983	BRD8	0	0	0	0	0	0	1	0	0	0	0	0	0	0	0	1
	ENSG00000113360	DROSHA	0	0	0	0	0	0	0	0	1	0	0	0	0	0	0	1
	ENSG00000113649	TCERG1	0	0	0	0	0	0	0	0	0	0	0	0	0	0	1	1
	ENSG00000114554	PLXNA1	0	0	0	0	0	0	0	0	0	0	0	0	0	0	1	1
	ENSG00000115091	ACTR3	0	0	0	0	0	0	0	0	0	0	0	1	0	0	0	1
	ENSG00000115548	KDM3A	0	0	0	0	0	0	0	0	1	0	0	0	0	0	0	1
	ENSG00000115657	ABCB6	0	0	0	0	0	0	0	0	1	0	0	0	0	0	0	1
	ENSG00000118785	SPP1	1	0	0	0	0	0	0	0	0	0	0	0	0	0	0	1
	ENSG00000121005	CRISPLD1	0	0	0	0	0	0	0	0	1	0	0	0	0	0	0	1
	ENSG00000122483	CCDC18	0	0	0	0	0	0	0	0	1	0	0	0	0	0	0	1
	ENSG00000127328	RAB3IP	1	0	0	0	0	0	0	0	0	0	0	0	0	0	0	1
	ENSG00000130540	SULT4A1	0	0	0	0	0	0	0	0	0	0	0	0	0	0	1	1
	ENSG00000131473	ACLY	0	0	0	0	0	0	1	0	0	0	0	0	0	0	0	1
	ENSG00000131508	UBE2D2	0	0	0	0	0	0	0	0	0	0	0	0	1	0	0	1
	ENSG00000132740	IGHMBP2	0	0	0	0	0	0	0	0	0	0	0	0	0	0	1	1
	ENSG00000133740	E2F5	1	0	0	0	0	0	0	0	0	0	0	0	0	0	0	1
	ENSG00000134910	STT3A	0	0	0	0	0	0	0	0	1	0	0	0	0	0	0	1
	ENSG00000136243	NUPL2	0	0	0	0	0	0	0	0	1	0	0	0	0	0	0	1
	ENSG00000136891	TEX10	0	0	0	0	0	0	0	0	1	0	0	0	0	0	0	1
	ENSG00000137804	NUSAP1	0	0	0	0	0	1	0	0	0	0	0	0	0	0	0	1
	ENSG00000137842	TMEM62	0	0	0	0	0	0	0	0	0	1	0	0	0	0	0	1
	ENSG00000137968	SLC44A5	0	0	0	0	0	0	1	0	0	0	0	0	0	0	0	1
	ENSG00000138231	DBR1	0	0	0	0	0	0	0	0	1	0	0	0	0	0	0	1
	ENSG00000142856	ITGB3BP	0	0	0	0	0	0	1	0	0	0	0	0	0	0	0	1
	ENSG00000143799	PARP1	1	0	0	0	0	0	0	0	0	0	0	0	0	0	0	1
	ENSG00000146535	GNA12	0	0	0	0	0	0	0	1	0	0	0	0	0	0	0	1
	ENSG00000147118	ZNF182	0	0	0	0	0	0	0	0	1	0	0	0	0	0	0	1
	ENSG00000147684	NDUFB9	1	0	0	0	0	0	0	0	0	0	0	0	0	0	0	1
	ENSG00000147697	GSDMC	0	0	0	0	0	0	0	0	0	0	0	0	1	0	0	1
	ENSG00000148848	ADAM12	0	0	0	0	0	0	0	1	0	0	0	0	0	0	0	1
	ENSG00000149100	EIF3M	0	0	0	0	0	0	0	1	0	0	0	0	0	0	0	1
	ENSG00000149328	GLB1L2	0	0	0	0	0	0	1	0	0	0	0	0	0	0	0	1
	ENSG00000149548	CCDC15	0	0	0	0	0	0	0	0	1	0	0	0	0	0	0	1
	ENSG00000151475	SLC25A31	0	0	0	0	0	0	0	0	0	0	0	0	0	0	1	1
	ENSG00000152240	HAUS1	0	0	0	0	0	0	0	0	0	0	0	1	0	0	0	1
	ENSG00000152422	XRCC4	0	0	0	0	0	0	0	0	0	0	0	1	0	0	0	1
	ENSG00000154429	CCSAP	0	0	0	0	0	0	0	0	0	0	0	0	0	0	1	1
	ENSG00000155363	MOV10	0	0	0	0	0	0	1	0	0	0	0	0	0	0	0	1
	ENSG00000156504	FAM122B	0	0	0	0	0	0	0	0	0	0	0	0	0	0	1	1
	ENSG00000157601	MX1	0	0	0	0	0	1	0	0	0	0	0	0	0	0	0	1
	ENSG00000158079	PTPDC1	0	0	0	0	0	0	0	0	0	0	0	0	0	0	1	1
	ENSG00000158941	CCAR2	1	0	0	0	0	0	0	0	0	0	0	0	0	0	0	1
	ENSG00000159063	ALG8	0	0	0	0	0	0	0	0	0	0	0	0	0	1	0	1
	ENSG00000161057	PSMC2	0	0	0	0	0	0	0	0	0	0	0	0	0	1	0	1
	ENSG00000163161	ERCC3	0	0	0	0	0	0	1	0	0	0	0	0	0	0	0	1
	ENSG00000163482	STK36	0	0	0	0	0	0	1	0	0	0	0	0	0	0	0	1
	ENSG00000163902	RPN1	0	0	0	0	0	0	0	0	0	0	0	0	0	1	0	1
	ENSG00000165280	VCP	1	0	0	0	0	0	0	0	0	0	0	0	0	0	0	1
	ENSG00000166069	TMCO5A	0	0	0	0	0	0	0	0	0	1	0	0	0	0	0	1
	ENSG00000166164	BRD7	1	0	0	0	0	0	0	0	0	0	0	0	0	0	0	1
	ENSG00000167881	SRP68	0	0	0	0	0	0	1	0	0	0	0	0	0	0	0	1
	ENSG00000172009	THOP1	0	0	0	0	0	0	0	0	0	0	0	0	0	1	0	1
	ENSG00000173950	XXYLT1	0	0	0	0	0	0	1	0	0	0	0	0	0	0	0	1
	ENSG00000176124	DLEU1	0	0	0	0	0	0	0	0	0	0	0	1	0	0	0	1
	ENSG00000176826	FKBP9P1	0	0	0	0	0	0	0	0	0	0	0	1	0	0	0	1
	ENSG00000177646	ACAD9	0	0	0	0	0	0	0	0	0	0	0	0	0	1	0	1
	ENSG00000178397	FAM220A	0	0	0	0	0	0	0	0	1	0	0	0	0	0	0	1
	ENSG00000180919	OR56B4	0	0	0	0	1	0	0	0	0	0	0	0	0	0	0	1
	ENSG00000185404	SP140L	0	0	0	0	0	0	0	0	0	0	0	1	0	0	0	1
	ENSG00000185420	SMYD3	0	0	0	0	0	0	1	0	0	0	0	0	0	0	0	1
	ENSG00000186340	THBS2	0	0	0	0	0	0	0	1	0	0	0	0	0	0	0	1
	ENSG00000187012	LINC00207	0	0	0	0	0	0	0	0	0	0	0	0	0	0	1	1
	ENSG00000187627	RGPD1	0	0	0	0	0	0	0	0	0	0	0	0	0	1	0	1
	ENSG00000187997	C17orf99	0	0	0	0	0	0	1	0	0	0	0	0	0	0	0	1
	ENSG00000188739	RBM34	0	0	0	0	0	0	1	0	0	0	0	0	0	0	0	1
	ENSG00000188933	USP32P1	0	0	1	0	0	0	0	0	0	0	0	0	0	0	0	1
	ENSG00000189013	KIR2DL4	0	0	0	0	1	0	0	0	0	0	0	0	0	0	0	1
	ENSG00000189366	ALG1L	1	0	0	0	0	0	0	0	0	0	0	0	0	0	0	1
	ENSG00000196305	IARS	1	0	0	0	0	0	0	0	0	0	0	0	0	0	0	1
	ENSG00000196335	STK31	0	0	0	0	0	0	0	0	0	0	0	0	0	0	1	1
	ENSG00000196611	MMP1	0	0	0	0	0	0	0	0	0	0	0	1	0	0	0	1
	ENSG00000198765	SYCP1	0	0	0	0	0	0	1	0	0	0	0	0	0	0	0	1
	ENSG00000198792	TMEM184B	0	0	0	0	0	0	0	0	0	0	0	0	0	0	1	1
	ENSG00000198874	TYW1	0	0	0	0	0	0	0	1	0	0	0	0	0	0	0	1
	ENSG00000205464	ATP6AP1L	0	1	0	0	0	0	0	0	0	0	0	0	0	0	0	1
	ENSG00000205853	RFPL3S	0	0	0	0	0	0	0	0	1	0	0	0	0	0	0	1
	ENSG00000214435	AS3MT	0	0	0	0	0	0	0	0	0	0	0	0	0	1	0	1
	ENSG00000224712	NPIPA3	0	0	0	0	0	0	0	0	0	0	0	0	0	0	1	1
	ENSG00000228315	GUSBP11	0	0	1	0	0	0	0	0	0	0	0	0	0	0	0	1
	ENSG00000229373	LINC00452	0	0	0	0	0	0	0	0	0	0	1	0	0	0	0	1
	ENSG00000233776	LINC01251	0	0	0	0	1	0	0	0	0	0	0	0	0	0	0	1
	ENSG00000234070	SPATA17-AS1	0	0	0	0	0	0	0	0	1	0	0	0	0	0	0	1
	ENSG00000239921	LINC01471	0	0	1	0	0	0	0	0	0	0	0	0	0	0	0	1
	ENSG00000248333	CDK11B	0	0	0	0	1	0	0	0	0	0	0	0	0	0	0	1
	ENSG00000253729	PRKDC	1	0	0	0	0	0	0	0	0	0	0	0	0	0	0	1
	ENSG00000254166	CASC19	0	0	0	0	0	0	1	0	0	0	0	0	0	0	0	1
	ENSG00000254349	MIR2052HG	0	0	0	0	0	0	0	0	1	0	0	0	0	0	0	1
	ENSG00000254560	BBOX1-AS1	0	0	0	0	0	0	0	0	0	0	0	1	0	0	0	1
	ENSG00000254852	NPIPA2	0	0	0	0	0	0	0	0	1	0	0	0	0	0	0	1
	ENSG00000255185	PDXDC2P	0	0	0	0	0	0	0	0	1	0	0	0	0	0	0	1
	ENSG00000256053	APOPT1	0	0	0	0	0	0	0	0	0	0	0	0	1	0	0	1
	ENSG00000259129	LINC00648	0	0	0	0	0	0	1	0	0	0	0	0	0	0	0	1
	ENSG00000259158	ADAM20P1	0	0	1	0	0	0	0	0	0	0	0	0	0	0	0	1
	ENSG00000266338	NBPF15	0	0	0	0	0	0	1	0	0	0	0	0	0	0	0	1
	ENSG00000273294	C1QTNF3-AMACR	0	0	0	0	0	0	1	0	0	0	0	0	0	0	0	1
	ENSG00000005302	MSL3	0	0	0	0	0	0	0	0	0	0	0	0	0	0	0	0
	ENSG00000007384	RHBDF1	0	0	0	0	0	0	0	0	0	0	0	0	0	0	0	0
	ENSG00000008128	CDK11A	0	0	0	0	0	0	0	0	0	0	0	0	0	0	0	0
	ENSG00000010292	NCAPD2	0	0	0	0	0	0	0	0	0	0	0	0	0	0	0	0
	ENSG00000013573	DDX11	0	0	0	0	0	0	0	0	0	0	0	0	0	0	0	0
	ENSG00000060718	COL11A1	0	0	0	0	0	0	0	0	0	0	0	0	0	0	0	0
	ENSG00000063601	MTMR1	0	0	0	0	0	0	0	0	0	0	0	0	0	0	0	0
	ENSG00000071655	MBD3	0	0	0	0	0	0	0	0	0	0	0	0	0	0	0	0
	ENSG00000073111	MCM2	0	0	0	0	0	0	0	0	0	0	0	0	0	0	0	0
	ENSG00000075218	GTSE1	0	0	0	0	0	0	0	0	0	0	0	0	0	0	0	0
	ENSG00000089820	ARHGAP4	0	0	0	0	0	0	0	0	0	0	0	0	0	0	0	0
	ENSG00000090372	STRN4	0	0	0	0	0	0	0	0	0	0	0	0	0	0	0	0
	ENSG00000100281	HMGXB4	0	0	0	0	0	0	0	0	0	0	0	0	0	0	0	0
	ENSG00000101003	GINS1	0	0	0	0	0	0	0	0	0	0	0	0	0	0	0	0
	ENSG00000101161	PRPF6	0	0	0	0	0	0	0	0	0	0	0	0	0	0	0	0
	ENSG00000101337	TM9SF4	0	0	0	0	0	0	0	0	0	0	0	0	0	0	0	0
	ENSG00000104731	KLHDC4	0	0	0	0	0	0	0	0	0	0	0	0	0	0	0	0
	ENSG00000106105	GARS	0	0	0	0	0	0	0	0	0	0	0	0	0	0	0	0
	ENSG00000106603	COA1	0	0	0	0	0	0	0	0	0	0	0	0	0	0	0	0
	ENSG00000108039	XPNPEP1	0	0	0	0	0	0	0	0	0	0	0	0	0	0	0	0
	ENSG00000108424	KPNB1	0	0	0	0	0	0	0	0	0	0	0	0	0	0	0	0
	ENSG00000112659	CUL9	0	0	0	0	0	0	0	0	0	0	0	0	0	0	0	0
	ENSG00000113810	SMC4	0	0	0	0	0	0	0	0	0	0	0	0	0	0	0	0
	ENSG00000114346	ECT2	0	0	0	0	0	0	0	0	0	0	0	0	0	0	0	0
	ENSG00000114416	FXR1	0	0	0	0	0	0	0	0	0	0	0	0	0	0	0	0
	ENSG00000116809	ZBTB17	0	0	0	0	0	0	0	0	0	0	0	0	0	0	0	0
	ENSG00000119392	GLE1	0	0	0	0	0	0	0	0	0	0	0	0	0	0	0	0
	ENSG00000127526	SLC35E1	0	0	0	0	0	0	0	0	0	0	0	0	0	0	0	0
	ENSG00000127928	GNGT1	0	0	0	0	0	0	0	0	0	0	0	0	0	0	0	0
	ENSG00000130332	LSM7	0	0	0	0	0	0	0	0	0	0	0	0	0	0	0	0
	ENSG00000130921	C12orf65	0	0	0	0	0	0	0	0	0	0	0	0	0	0	0	0
	ENSG00000132600	PRMT7	0	0	0	0	0	0	0	0	0	0	0	0	0	0	0	0
	ENSG00000132676	DAP3	0	0	0	0	0	0	0	0	0	0	0	0	0	0	0	0
	ENSG00000133063	CHIT1	0	0	0	0	0	0	0	0	0	0	0	0	0	0	0	0
	ENSG00000135119	RNFT2	0	0	0	0	0	0	0	0	0	0	0	0	0	0	0	0
	ENSG00000136731	UGGT1	0	0	0	0	0	0	0	0	0	0	0	0	0	0	0	0
	ENSG00000139974	SLC38A6	0	0	0	0	0	0	0	0	0	0	0	0	0	0	0	0
	ENSG00000145494	NDUFS6	0	0	0	0	0	0	0	0	0	0	0	0	0	0	0	0
	ENSG00000146143	PRIM2	0	0	0	0	0	0	0	0	0	0	0	0	0	0	0	0
	ENSG00000146666	LINC00525	0	0	0	0	0	0	0	0	0	0	0	0	0	0	0	0
	ENSG00000146707	POMZP3	0	0	0	0	0	0	0	0	0	0	0	0	0	0	0	0
	ENSG00000147874	HAUS6	0	0	0	0	0	0	0	0	0	0	0	0	0	0	0	0
	ENSG00000148824	MTG1	0	0	0	0	0	0	0	0	0	0	0	0	0	0	0	0
	ENSG00000151725	CENPU	0	0	0	0	0	0	0	0	0	0	0	0	0	0	0	0
	ENSG00000152348	ATG10	0	0	0	0	0	0	0	0	0	0	0	0	0	0	0	0
	ENSG00000152359	POC5	0	0	0	0	0	0	0	0	0	0	0	0	0	0	0	0
	ENSG00000154978	VOPP1	0	0	0	0	0	0	0	0	0	0	0	0	0	0	0	0
	ENSG00000156831	NSMCE2	0	0	0	0	0	0	0	0	0	0	0	0	0	0	0	0
	ENSG00000160256	FAM207A	0	0	0	0	0	0	0	0	0	0	0	0	0	0	0	0
	ENSG00000164054	SHISA5	0	0	0	0	0	0	0	0	0	0	0	0	0	0	0	0
	ENSG00000165490	DDIAS	0	0	0	0	0	0	0	0	0	0	0	0	0	0	0	0
	ENSG00000167196	FBXO22	0	0	0	0	0	0	0	0	0	0	0	0	0	0	0	0
	ENSG00000169246	NPIPB3	0	0	0	0	0	0	0	0	0	0	0	0	0	0	0	0
	ENSG00000172551	MUCL1	0	0	0	0	0	0	0	0	0	0	0	0	0	0	0	0
	ENSG00000172890	NADSYN1	0	0	0	0	0	0	0	0	0	0	0	0	0	0	0	0
	ENSG00000173120	KDM2A	0	0	0	0	0	0	0	0	0	0	0	0	0	0	0	0
	ENSG00000173226	IQCB1	0	0	0	0	0	0	0	0	0	0	0	0	0	0	0	0
	ENSG00000174842	GLMN	0	0	0	0	0	0	0	0	0	0	0	0	0	0	0	0
	ENSG00000176256	HMGB4	0	0	0	0	0	0	0	0	0	0	0	0	0	0	0	0
	ENSG00000176294	OR4N2	0	0	0	0	0	0	0	0	0	0	0	0	0	0	0	0
	ENSG00000178921	PFAS	0	0	0	0	0	0	0	0	0	0	0	0	0	0	0	0
	ENSG00000180083	WFDC11	0	0	0	0	0	0	0	0	0	0	0	0	0	0	0	0
	ENSG00000180182	MED14	0	0	0	0	0	0	0	0	0	0	0	0	0	0	0	0
	ENSG00000183426	NPIPA1	0	0	0	0	0	0	0	0	0	0	0	0	0	0	0	0
	ENSG00000183628	DGCR6	0	0	0	0	0	0	0	0	0	0	0	0	0	0	0	0
	ENSG00000183793	NPIPA5	0	0	0	0	0	0	0	0	0	0	0	0	0	0	0	0
	ENSG00000185864	NPIPB4	0	0	0	0	0	0	0	0	0	0	0	0	0	0	0	0
	ENSG00000188629	ZNF177	0	0	0	0	0	0	0	0	0	0	0	0	0	0	0	0
	ENSG00000189042	ZNF567	0	0	0	0	0	0	0	0	0	0	0	0	0	0	0	0
	ENSG00000189212	DPY19L2P1	0	0	0	0	0	0	0	0	0	0	0	0	0	0	0	0
	ENSG00000198466	ZNF587	0	0	0	0	0	0	0	0	0	0	0	0	0	0	0	0
	ENSG00000198563	DDX39B	0	0	0	0	0	0	0	0	0	0	0	0	0	0	0	0
	ENSG00000205822	TPTE2P6	0	0	0	0	0	0	0	0	0	0	0	0	0	0	0	0
	ENSG00000205863	C1QTNF9B	0	0	0	0	0	0	0	0	0	0	0	0	0	0	0	0
	ENSG00000206140	TMEM191C	0	0	0	0	0	0	0	0	0	0	0	0	0	0	0	0
	ENSG00000206195	DUXAP8	0	0	0	0	0	0	0	0	0	0	0	0	0	0	0	0
	ENSG00000206531	CD200R1L	0	0	0	0	0	0	0	0	0	0	0	0	0	0	0	0
	ENSG00000213923	CSNK1E	0	0	0	0	0	0	0	0	0	0	0	0	0	0	0	0
	ENSG00000214880	OR7E5P	0	0	0	0	0	0	0	0	0	0	0	0	0	0	0	0
	ENSG00000214954	LRRC69	0	0	0	0	0	0	0	0	0	0	0	0	0	0	0	0
	ENSG00000215126	CBWD6	0	0	0	0	0	0	0	0	0	0	0	0	0	0	0	0
	ENSG00000224533	TMLHE-AS1	0	0	0	0	0	0	0	0	0	0	0	0	0	0	0	0
	ENSG00000225249	LINC00378	0	0	0	0	0	0	0	0	0	0	0	0	0	0	0	0
	ENSG00000225623	AGBL4-IT1	0	0	0	0	0	0	0	0	0	0	0	0	0	0	0	0
	ENSG00000227232	WASH7P	0	0	0	0	0	0	0	0	0	0	0	0	0	0	0	0
	ENSG00000228669	LINC00448	0	0	0	0	0	0	0	0	0	0	0	0	0	0	0	0
	ENSG00000230316	FEZF1-AS1	0	0	0	0	0	0	0	0	0	0	0	0	0	0	0	0
	ENSG00000230402	LINC01349	0	0	0	0	0	0	0	0	0	0	0	0	0	0	0	0
	ENSG00000231383	FGF12-AS1	0	0	0	0	0	0	0	0	0	0	0	0	0	0	0	0
	ENSG00000232119	MCTS1	0	0	0	0	0	0	0	0	0	0	0	0	0	0	0	0
	ENSG00000232827	LINC01189	0	0	0	0	0	0	0	0	0	0	0	0	0	0	0	0
	ENSG00000232885	GPC5-AS2	0	0	0	0	0	0	0	0	0	0	0	0	0	0	0	0
	ENSG00000233327	USP32P2	0	0	0	0	0	0	0	0	0	0	0	0	0	0	0	0
	ENSG00000236176	LINC00353	0	0	0	0	0	0	0	0	0	0	0	0	0	0	0	0
	ENSG00000237945	LINC00649	0	0	0	0	0	0	0	0	0	0	0	0	0	0	0	0
	ENSG00000237978	KCNMB2-AS1	0	0	0	0	0	0	0	0	0	0	0	0	0	0	0	0
	ENSG00000239642	MEIKIN	0	0	0	0	0	0	0	0	0	0	0	0	0	0	0	0
	ENSG00000240682	ISY1	0	0	0	0	0	0	0	0	0	0	0	0	0	0	0	0
	ENSG00000241359	SYNPR-AS1	0	0	0	0	0	0	0	0	0	0	0	0	0	0	0	0
	ENSG00000241369	LINC01192	0	0	0	0	0	0	0	0	0	0	0	0	0	0	0	0
	ENSG00000243716	NPIPB5	0	0	0	0	0	0	0	0	0	0	0	0	0	0	0	0
	ENSG00000244257	PKD1P1	0	0	0	0	0	0	0	0	0	0	0	0	0	0	0	0
	ENSG00000244306	DUXAP10	0	0	0	0	0	0	0	0	0	0	0	0	0	0	0	0
	ENSG00000249395	CASC9	0	0	0	0	0	0	0	0	0	0	0	0	0	0	0	0
	ENSG00000250682	LINC00491	0	0	0	0	0	0	0	0	0	0	0	0	0	0	0	0
	ENSG00000261008	LINC01572	0	0	0	0	0	0	0	0	0	0	0	0	0	0	0	0
	ENSG00000267313	KC6	0	0	0	0	0	0	0	0	0	0	0	0	0	0	0	0
	ENSG00000267680	ZNF224	0	0	0	0	0	0	0	0	0	0	0	0	0	0	0	0
	ENSG00000274810	NPHP3-ACAD11	0	0	0	0	0	0	0	0	0	0	0	0	0	0	0	0
	ENSG00000278558	TMEM191B	0	0	0	0	0	0	0	0	0	0	0	0	0	0	0	0
	ENSG00000280953	LINC01163	0	0	0	0	0	0	0	0	0	0	0	0	0	0	0	0
