# Supplementary material for: Pan cancer characterization of genes whose expression has been associated with LINE-1 antisense promoter activity
Source: Mob DNA. 2023 Sep 18;14:13. doi: 10.1186/s13100-023-00300-x (PMC10506190; doi:10.1186/s13100-023-00300-x)
Supplement: Supplementary file 8 — Additional file 8. Table S5. The expression of L1 ASP related genes MCM2 and CENPU was associated with the magnitude of immune infiltration. [file 13100_2023_300_MOESM8_ESM.xlsx]

## Sheet: Table S5
Table S5. The expression of L1 ASP related genes MCM2 and CENPU was associated with the magnitude of immune infiltration
CENPU (estimate)													CENPU(timer)																									MCM2(estimate)
Immu	StromalScore	StromalScore	StromalScore	StromalScore	ImmuneScore	ImmuneScore	ImmuneScore	ImmuneScore	ESTIMATEScore	ESTIMATEScore	ESTIMATEScore	ESTIMATEScore	Immu	B cell	B cell	B cell	B cell	T cell CD4	T cell CD4	T cell CD4	T cell CD4	T cell CD8	T cell CD8	T cell CD8	T cell CD8	Neutrophil	Neutrophil	Neutrophil	Neutrophil	Macrophage	Macrophage	Macrophage	Macrophage	DC	DC	DC	DC	Immu	StromalScore	StromalScore	StromalScore	StromalScore	ImmuneScore	ImmuneScore	ImmuneScore	ImmuneScore	ESTIMATEScore	ESTIMATEScore	ESTIMATEScore
Method	pearson_R	pearson_P	spearman_P	spearman_R	pearson_R	pearson_P	spearman_P	spearman_R	pearson_R	pearson_P	spearman_P	spearman_R	Method	pearson_R	pearson_P	spearman_R	spearman_P	pearson_R	pearson_P	spearman_R	spearman_P	pearson_R	pearson_P	spearman_R	spearman_P	pearson_R	pearson_P	spearman_R	spearman_P	pearson_R	pearson_P	spearman_R	spearman_P	pearson_R	pearson_P	spearman_R	spearman_P	Method	pearson_R	pearson_P	spearman_P	spearman_R	pearson_R	pearson_P	spearman_P	spearman_R	pearson_R	pearson_P	spearman_P
TCGA-GBM(N=152)	-0.434833	2.17128e-08	-0.390769	6.44732e-07	-0.446853	7.89031e-09	-0.42395	5.25132e-08	-0.458623	2.8169e-09	-0.422252	6.0106e-08	TCGA-ACC(N=77)	0.0551462	0.633823	-0.0644619	0.577542	0.025729	0.824224	0.0712183	0.538226	0.158157	0.169509	0.0302592	0.793907	0.106177	0.358065	0.149167	0.195396	0.0214484	0.85311	0.0173774	0.880762	-0.0637726	0.581627	-0.126899	0.271429	TCGA-GBM(N=152)	-0.434833	2.17128e-08	-0.390769	6.44732e-07	-0.446853	7.89031e-09	-0.42395	5.25132e-08	-0.458623	2.8169e-09	-0.422252
TCGA-GBMLGG(N=656)	0.20908	6.49192e-08	0.237928	6.77929e-10	0.17704	5.06993e-06	0.206578	9.36857e-08	0.194997	4.82278e-07	0.225623	5.11871e-09	TCGA-BLCA(N=405)	0.0805537	0.105505	0.0377221	0.44901	0.00332738	0.946776	0.00989902	0.842573	0.153957	0.00188813	0.207958	2.46102e-05	0.128989	0.00935809	0.163199	0.000979681	0.0713703	0.151661	0.158808	0.00134387	0.138864	0.00511784	0.141564	0.00431049	TCGA-GBMLGG(N=656)	0.20908	6.49192e-08	0.237928	6.77929e-10	0.17704	5.06993e-06	0.206578	9.36857e-08	0.194997	4.82278e-07	0.225623
TCGA-LGG(N=504)	0.0185073	0.678514	0.00657218	0.88299	0.0378148	0.396919	0.0447034	0.316537	0.0312822	0.483484	0.0317855	0.476471	TCGA-BRCA(N=1077)	-0.0349763	0.25144	0.00874808	0.774293	-0.134351	9.68717e-06	-0.157244	2.14054e-07	-0.0839613	0.00583192	-0.0625377	0.0401728	-3.5623e-05	0.999068	0.00538366	0.85992	-0.0557382	0.067475	-0.0367147	0.228629	-0.0832327	0.0062746	-0.0700105	0.0215769	TCGA-LGG(N=504)	0.0185073	0.678514	0.00657218	0.88299	0.0378148	0.396919	0.0447034	0.316537	0.0312822	0.483484	0.0317855
TCGA-CESC(N=291)	-0.127401	0.0297951	-0.130939	0.0255054	-0.154337	0.00835751	-0.139198	0.0175061	-0.160699	0.00600711	-0.143763	0.0141032	TCGA-CESC(N=291)	-0.121111	0.0389506	-0.117698	0.0448441	-0.00187941	0.974534	-0.0287335	0.625445	-0.0688038	0.241985	0.010758	0.855007	0.0135853	0.817501	-0.00747947	0.898907	-0.155764	0.00776857	-0.0649993	0.269072	-0.101267	0.0846211	-0.108861	0.06366	TCGA-UCEC(N=178)	-0.307529	2.97087e-05	-0.237666	0.00140113	-0.317256	1.59675e-05	-0.28568	0.000110877	-0.343484	2.67948e-06	-0.281708
TCGA-LUAD(N=500)	-0.168298	0.000156305	-0.147203	0.000962303	-0.156391	0.000448322	-0.133521	0.00277572	-0.17446	8.80425e-05	-0.150855	0.000713982	TCGA-CHOL(N=36)	-0.174189	0.309609	-0.030888	0.858071	-0.185424	0.278941	-0.0416988	0.809192	0.27212	0.10837	0.133333	0.438199	0.137565	0.423668	0.109395	0.525352	0.233745	0.170043	0.128958	0.45351	0.0551515	0.749367	0.12175	0.479343	TARGET-LAML(N=142)	0.0663087	0.433017	0.05151	0.542662	0.0249485	0.768212	0.0215177	0.79936	0.0446242	0.59797	0.0350574
TCGA-COAD(N=282)	-0.0907878	0.128271	-0.036472	0.541894	-0.00575849	0.923304	0.0507417	0.395959	-0.0537653	0.368379	0.0134237	0.822422	TCGA-COAD(N=282)	0.107713	0.0709138	0.192844	0.00113545	-0.0997988	0.0943979	-0.057071	0.339625	0.0718698	0.22894	0.0814825	0.172405	0.0544274	0.362503	0.0902238	0.130669	-0.110561	0.0637289	-0.074793	0.21051	0.000902856	0.987957	0.0741104	0.214715	TCGA-BRCA(N=1077)	-0.298345	1.39939e-23	-0.316107	2.03218e-26	-0.0875484	0.00403617	-0.0887646	0.00355208	-0.20477	1.16672e-11	-0.212028
TCGA-COADREAD(N=373)	-0.0622172	0.230628	-0.0279637	0.590328	-0.00763529	0.883156	0.0364589	0.482674	-0.0390053	0.452608	0.00938165	0.856693	TCGA-COADREAD(N=373)	0.09533	0.0658946	0.144149	0.00528372	-0.10301	0.0468046	-0.0692563	0.181983	0.069607	0.179774	0.0760534	0.14264	0.0475458	0.359825	0.0825693	0.111374	-0.110609	0.0327125	-0.0681004	0.189403	-0.00693346	0.89383	0.0495026	0.340373	TCGA-CESC(N=291)	-0.127401	0.0297951	-0.130939	0.0255054	-0.154337	0.00835751	-0.139198	0.0175061	-0.160699	0.00600711	-0.143763
TCGA-LAML(N=149)	-0.248723	0.00222297	-0.145509	0.07662	-0.247256	0.00236519	-0.193106	0.0182966	-0.262827	0.00120235	-0.178468	0.0294326	TCGA-DLBC(N=46)	0.0618002	0.68327	0.09234	0.541629	-0.307415	0.0376883	-0.323106	0.0285082	-0.117989	0.434831	0.0334269	0.825455	-0.061547	0.6845	0.0461315	0.7608	0.203001	0.176034	0.174061	0.24731	-0.123662	0.412909	-0.134571	0.37258	TCGA-LUAD(N=500)	-0.168298	0.000156305	-0.147203	0.000962303	-0.156391	0.000448322	-0.133521	0.00277572	-0.17446	8.80425e-05	-0.150855
TCGA-BRCA(N=1077)	-0.298345	1.39939e-23	-0.316107	2.03218e-26	-0.0875484	0.00403617	-0.0887646	0.00355208	-0.20477	1.16672e-11	-0.212028	2.06163e-12	TCGA-ESCA(N=181)	-0.206685	0.00524484	-0.0833186	0.264803	-0.0172	0.818234	0.116001	0.119927	-0.129532	0.0822221	-0.129017	0.0834579	0.0836954	0.26264	0.0600867	0.42168	-0.0528124	0.480133	-0.0647059	0.386816	-0.0657024	0.379531	-0.0218304	0.770518	TCGA-ESCA(N=181)	-0.141986	0.0565651	-0.117511	0.115151	-0.296398	5.09072e-05	-0.292586	6.41788e-05	-0.239042	0.00119186	-0.216275
TCGA-ESCA(N=181)	-0.141986	0.0565651	-0.117511	0.115151	-0.296398	5.09072e-05	-0.292586	6.41788e-05	-0.239042	0.00119186	-0.216275	0.00345323	TCGA-GBM(N=152)	-0.00552469	0.946143	0.0385102	0.637611	-0.240757	0.00280975	-0.301894	0.00015692	0.244214	0.0024289	0.326804	3.96939e-05	-0.304355	0.000137728	-0.319077	6.15943e-05	-0.257155	0.00138282	-0.1663	0.0405956	-0.0960876	0.238958	-0.207957	0.0101443	TCGA-STES(N=569)	-0.33455	2.40055e-16	-0.311402	2.92541e-14	-0.279362	1.16314e-11	-0.273119	3.42608e-11	-0.331194	4.94151e-16	-0.318039
TCGA-STES(N=569)	-0.33455	2.40055e-16	-0.311402	2.92541e-14	-0.279362	1.16314e-11	-0.273119	3.42608e-11	-0.331194	4.94151e-16	-0.318039	7.69939e-15	TCGA-GBMLGG(N=656)	0.0931711	0.0169871	0.0891801	0.0223527	-0.0476487	0.222933	-0.0107479	0.783498	0.396365	4.17182e-26	0.417556	4.59208e-29	0.141088	0.000289104	0.203531	1.4552e-07	0.103606	0.00791469	0.168605	1.41665e-05	0.134438	0.00055562	0.18475	1.89824e-06	TCGA-SARC(N=258)	-0.379377	2.9526e-10	-0.457093	1.00576e-14	-0.312131	3.09364e-07	-0.326975	7.66016e-08	-0.363212	1.82918e-09	-0.407476
TCGA-SARC(N=258)	-0.379377	2.9526e-10	-0.457093	1.00576e-14	-0.312131	3.09364e-07	-0.326975	7.66016e-08	-0.363212	1.82918e-09	-0.407476	9.68337e-12	TCGA-HNSC(N=517)	0.209096	1.61897e-06	0.118815	0.0068382	0.153443	0.000463093	0.0961782	0.0287686	0.0763788	0.08274	0.0615167	0.162509	0.128474	0.00343059	0.148054	0.000733145	-0.0600414	0.172843	-0.06165	0.161599	0.0936246	0.0333101	0.0734738	0.0951507	TCGA-KIRP(N=285)	-0.118097	0.0463795	-0.131426	0.0265132	-0.256013	1.2079e-05	-0.272211	3.107e-06	-0.212818	0.000296273	-0.229454
TCGA-KIRP(N=285)	-0.118097	0.0463795	-0.131426	0.0265132	-0.256013	1.2079e-05	-0.272211	3.107e-06	-0.212818	0.000296273	-0.229454	9.27207e-05	TCGA-KICH(N=65)	-0.0575514	0.648844	0.0292405	0.817144	0.0306323	0.808602	-0.223215	0.0738847	-0.0193488	0.878412	0.0599451	0.635256	0.112714	0.371347	-0.0619994	0.623689	0.167162	0.183209	0.0308577	0.807221	0.116176	0.356741	0.108111	0.391321	TCGA-KIPAN(N=878)	-0.0511023	0.130267	-0.0303228	0.369493	-0.0766452	0.0231358	-0.0623385	0.0648457	-0.0682204	0.0432881	-0.039925
TCGA-KIPAN(N=878)	-0.0511023	0.130267	-0.0303228	0.369493	-0.0766452	0.0231358	-0.0623385	0.0648457	-0.0682204	0.0432881	-0.039925	0.237283	TCGA-KIPAN(N=878)	0.0973251	0.00389437	0.122861	0.00026311	0.148599	9.80438e-06	0.158479	2.3692e-06	0.150099	7.94821e-06	0.110208	0.0010721	0.255841	1.37645e-14	0.239029	7.13163e-13	-0.0262279	0.437639	0.0269692	0.424793	0.18206	5.55961e-08	0.191337	1.10154e-08	TCGA-COAD(N=282)	-0.0907878	0.128271	-0.036472	0.541894	-0.00575849	0.923304	0.0507417	0.395959	-0.0537653	0.368379	0.0134237
TCGA-STAD(N=388)	-0.326612	4.26797e-11	-0.309792	4.47229e-10	-0.161753	0.00138878	-0.151938	0.00269439	-0.265573	1.0965e-07	-0.260006	2.05156e-07	TCGA-KIRC(N=528)	0.23747	3.3345e-08	0.233318	5.8426e-08	0.151839	0.000463419	0.178066	3.87386e-05	0.258146	1.74387e-09	0.250092	5.68117e-09	0.33584	2.18794e-15	0.326475	1.4049e-14	0.148904	0.000597807	0.167919	0.000105795	0.291693	8.1479e-12	0.285806	2.20393e-11	TCGA-COADREAD(N=373)	-0.0622172	0.230628	-0.0279637	0.590328	-0.00763529	0.883156	0.0364589	0.482674	-0.0390053	0.452608	0.00938165
TCGA-PRAD(N=495)	-0.0580701	0.19712	-0.0375502	0.404494	-0.0302972	0.501253	-0.039534	0.380109	-0.0465175	0.301655	-0.0368874	0.412845	TCGA-KIRP(N=285)	0.0199586	0.737253	0.00615976	0.91754	0.13305	0.0246865	0.134881	0.0227586	0.0685797	0.248488	-0.023671	0.690696	0.146308	0.0134201	0.10713	0.0709464	-0.273698	2.73057e-06	-0.170261	0.00394174	0.042741	0.47232	0.0430587	0.469031	TCGA-PRAD(N=495)	-0.0580701	0.19712	-0.0375502	0.404494	-0.0302972	0.501253	-0.039534	0.380109	-0.0465175	0.301655	-0.0368874
TCGA-UCEC(N=178)	-0.307529	2.97087e-05	-0.237666	0.00140113	-0.317256	1.59675e-05	-0.28568	0.000110877	-0.343484	2.67948e-06	-0.281708	0.000139298	TCGA-LGG(N=504)	0.236425	7.8354e-08	0.241874	3.83201e-08	0.11251	0.0114845	0.149555	0.00075678	0.113399	0.0108432	0.0564553	0.205771	0.181178	4.2908e-05	0.200748	5.57483e-06	0.170574	0.00011903	0.16305	0.000236922	0.215986	9.84461e-07	0.208288	2.40199e-06	TCGA-STAD(N=388)	-0.326612	4.26797e-11	-0.309792	4.47229e-10	-0.161753	0.00138878	-0.151938	0.00269439	-0.265573	1.0965e-07	-0.260006
TCGA-HNSC(N=517)	-0.161543	0.000225605	-0.154862	0.0004093	-0.0522783	0.235377	-0.0878143	0.0459652	-0.11709	0.0076971	-0.130479	0.0029556	TCGA-LIHC(N=363)	0.194313	0.000195343	0.241546	3.235e-06	0.162548	0.00189024	0.178104	0.000652193	0.105658	0.0442457	0.0650062	0.216618	0.289122	2.02587e-08	0.248911	1.57226e-06	0.225327	1.46355e-05	0.213076	4.26303e-05	0.269357	1.87972e-07	0.271681	1.45964e-07	TCGA-HNSC(N=517)	-0.161543	0.000225605	-0.154862	0.0004093	-0.0522783	0.235377	-0.0878143	0.0459652	-0.11709	0.0076971	-0.130479
TCGA-KIRC(N=528)	0.0690092	0.11323	0.104991	0.0158021	0.0773006	0.075951	0.0931174	0.0324151	0.0828325	0.0571573	0.119208	0.00609762	TCGA-LUAD(N=500)	-0.177311	6.70522e-05	-0.211093	1.9155e-06	-0.109903	0.0139401	-0.120798	0.00684523	0.0589883	0.187884	0.034928	0.435804	0.19186	1.56328e-05	0.162406	0.000265673	-0.0115533	0.796638	0.032897	0.462975	-0.0216947	0.628421	-0.0443685	0.322118	TCGA-KIRC(N=528)	0.0690092	0.11323	0.104991	0.0158021	0.0773006	0.075951	0.0931174	0.0324151	0.0828325	0.0571573	0.119208
TCGA-LUSC(N=491)	-0.328152	8.62503e-14	-0.298171	1.53865e-11	-0.322335	2.46945e-13	-0.293221	3.42562e-11	-0.34453	3.94577e-15	-0.316519	6.9121e-13	TCGA-LUSC(N=491)	-0.0480653	0.287802	-0.0479035	0.289429	-0.0682631	0.130912	-0.0775866	0.0859038	-0.0136662	0.762603	-0.031393	0.487669	-0.0536603	0.235284	-0.103378	0.0219633	-0.159136	0.000400401	-0.0933896	0.0385814	-0.122159	0.00672598	-0.139125	0.00200158	TCGA-LUSC(N=491)	-0.328152	8.62503e-14	-0.298171	1.53865e-11	-0.322335	2.46945e-13	-0.293221	3.42562e-11	-0.34453	3.94577e-15	-0.316519
TCGA-THYM(N=118)	-0.335134	0.000207587	-0.316984	0.000469966	0.0828983	0.372148	0.0782965	0.399363	-0.111744	0.228317	-0.106286	0.251995	TCGA-MESO(N=85)	0.172423	0.114572	0.318891	0.00293396	0.118079	0.281801	0.146855	0.179864	-0.0234278	0.831464	0.0760218	0.489245	-0.195563	0.072866	-0.0956331	0.383952	0.0976009	0.374198	0.140758	0.19882	0.168844	0.122412	0.207321	0.0569307	TCGA-THYM(N=118)	-0.335134	0.000207587	-0.316984	0.000469966	0.0828983	0.372148	0.0782965	0.399363	-0.111744	0.228317	-0.106286
TCGA-LIHC(N=363)	-0.214103	3.90655e-05	-0.228969	1.05266e-05	-0.0351281	0.504659	-0.0704245	0.180635	-0.121173	0.020932	-0.144832	0.00570125	TCGA-OV(N=417)	0.0259389	0.59737	0.0178985	0.715537	0.175514	0.000316587	0.181456	0.00019509	-0.00215066	0.965075	-0.0317284	0.518195	0.205785	2.28504e-05	0.223017	4.25514e-06	0.205851	2.27101e-05	0.237043	9.78158e-07	0.12811	0.00881804	0.0533633	0.276942	TCGA-LIHC(N=363)	-0.214103	3.90655e-05	-0.228969	1.05266e-05	-0.0351281	0.504659	-0.0704245	0.180635	-0.121173	0.020932	-0.144832
TCGA-THCA(N=503)	-0.0938344	0.0353877	-0.0973291	0.029064	-0.106954	0.0164113	-0.0750031	0.092894	-0.109044	0.0144122	-0.0920081	0.0391346	TCGA-PAAD(N=177)	0.131915	0.0800777	0.166671	0.0266075	0.00493276	0.948045	-0.069485	0.358096	0.113717	0.131791	0.0387786	0.608334	0.239195	0.00134403	0.128188	0.0890603	-0.181515	0.0156097	-0.210907	0.00483514	0.300093	4.94688e-05	0.182964	0.0147874	TARGET-WT(N=80)	-0.40118	0.000226038	-0.396249	0.000274208	-0.589574	8.71787e-09	-0.566456	4.33129e-08	-0.537858	2.6752e-07	-0.513432
TCGA-MESO(N=85)	0.0220372	0.841333	0.0657807	0.549748	-0.140405	0.19996	-0.0785226	0.475025	-0.0867578	0.429812	-0.0460231	0.675764	TCGA-PCPG(N=177)	0.106516	0.158221	0.129285	0.0863382	-0.143463	0.0567817	-0.0962904	0.202327	-0.116514	0.122491	-0.100647	0.182559	-0.0335707	0.657339	-0.0130161	0.863478	-0.0510457	0.499837	-0.0974138	0.197087	-0.0882049	0.243028	-0.0624014	0.409304	TCGA-SKCM-P(N=101)	-0.260163	0.00860226	-0.299146	0.00237465	-0.216361	0.029769	-0.247661	0.0125245	-0.253059	0.010672	-0.280835
TCGA-READ(N=91)	0.032258	0.761473	0.00220577	0.983444	-0.0153993	0.884807	-0.0110687	0.917065	0.0118163	0.911485	-0.0122074	0.908567	TCGA-PRAD(N=495)	0.256141	7.42141e-09	0.262307	3.11782e-09	0.0399991	0.374525	0.00675959	0.880754	0.158824	0.000389331	0.142537	0.00147538	0.144547	0.00126068	0.173343	0.000106068	0.0833641	0.0638435	0.0829241	0.0652623	0.133356	0.00295118	0.158224	0.000409857	TCGA-SKCM(N=452)	-0.0984223	0.0364588	-0.0976347	0.0379909	-0.059555	0.206312	-0.0487394	0.301155	-0.0793611	0.0919447	-0.0723768
TCGA-SKCM-M(N=351)	-0.10716	0.0448293	-0.0921449	0.0847358	-0.0715936	0.180819	-0.0535468	0.317147	-0.0911646	0.0881144	-0.0774166	0.147785	TCGA-READ(N=91)	-0.00791198	0.940666	0.0497378	0.639642	-0.137893	0.192414	-0.128899	0.223334	0.062492	0.556216	0.0486787	0.646796	-0.000422975	0.996825	-0.0282532	0.790358	-0.129721	0.220372	-0.0466561	0.660548	-0.0769155	0.468662	-0.133677	0.206499	TCGA-BLCA(N=405)	-0.0393648	0.429493	-0.0303453	0.542563	0.014676	0.768412	0.0346525	0.486791	-0.0130407	0.7936	-0.00128617
TCGA-SKCM(N=452)	-0.0984223	0.0364588	-0.0976347	0.0379909	-0.059555	0.206312	-0.0487394	0.301155	-0.0793611	0.0919447	-0.0723768	0.124414	TCGA-SARC(N=258)	-0.0704362	0.259624	0.0331383	0.596222	-0.194824	0.00166468	-0.191931	0.00195667	-0.0112704	0.85703	-6.25393e-05	0.999202	-0.165037	0.00790144	-0.177113	0.00432213	-0.204028	0.000980741	-0.246284	6.37569e-05	-0.150743	0.0153758	-0.196255	0.00153554	TCGA-SKCM-M(N=351)	-0.10716	0.0448293	-0.0921449	0.0847358	-0.0715936	0.180819	-0.0535468	0.317147	-0.0911646	0.0881144	-0.0774166
TCGA-PAAD(N=177)	0.0447846	0.55392	-0.0435191	0.565187	0.032303	0.669503	-0.0706732	0.349916	0.0405093	0.592413	-0.0501629	0.50729	TCGA-SKCM-M(N=351)	-0.0281667	0.598941	-0.0225993	0.673068	-0.0531238	0.32099	-0.0587149	0.272621	0.0244757	0.647682	0.0841066	0.115741	0.151139	0.00454235	0.122998	0.0211718	-0.112833	0.0345895	-0.0905152	0.0904116	-0.031617	0.554936	-0.0202476	0.705413	TCGA-THCA(N=503)	-0.0938344	0.0353877	-0.0973291	0.029064	-0.106954	0.0164113	-0.0750031	0.092894	-0.109044	0.0144122	-0.0920081
TCGA-OV(N=417)	-0.182285	0.000182126	-0.134542	0.00592877	-0.143827	0.00324492	-0.129985	0.00786776	-0.176173	0.000300276	-0.144607	0.00307981	TCGA-SKCM-P(N=101)	0.1269	0.206022	0.0706003	0.482948	-0.19353	0.0524866	-0.271137	0.00609638	0.263506	0.00775695	0.276583	0.00511244	0.2183	0.0282998	0.321848	0.00103051	0.0529407	0.599031	0.0672341	0.504108	-0.0805566	0.423242	-0.16586	0.0973928	TARGET-NB(N=153)	-0.493757	8.85241e-11	-0.457595	2.73618e-09	-0.306247	0.000118156	-0.242751	0.00249953	-0.419172	6.9366e-08	-0.368132
TCGA-TGCT(N=132)	-0.202492	0.0198855	-0.210516	0.0153989	-0.476995	7.3722e-09	-0.448504	6.92132e-08	-0.466393	1.73745e-08	-0.437612	1.54585e-07	TCGA-SKCM(N=452)	0.00317801	0.94628	0.0111681	0.812822	-0.0406773	0.388262	-0.0720191	0.126291	0.0512243	0.277151	0.11528	0.0141954	0.159045	0.00068979	0.151404	0.00124391	-0.0760643	0.106308	-0.0554853	0.239086	-0.00960424	0.838644	-0.0110205	0.815251	TCGA-MESO(N=85)	0.0220372	0.841333	0.0657807	0.549748	-0.140405	0.19996	-0.0785226	0.475025	-0.0867578	0.429812	-0.0460231
TCGA-PCPG(N=177)	-0.14645	0.0517649	-0.186387	0.0129935	-0.281207	0.000149733	-0.314471	2.01908e-05	-0.224901	0.00261616	-0.264448	0.000375311	TCGA-STAD(N=388)	-0.0825786	0.104346	-0.163219	0.00125391	-0.213208	2.28594e-05	-0.217807	1.50099e-05	-0.000574057	0.991007	-0.00469127	0.926611	0.00874805	0.863623	-0.0506154	0.320014	-0.257371	2.74581e-07	-0.241916	1.42396e-06	-0.070795	0.163999	-0.101893	0.0448769	TCGA-READ(N=91)	0.032258	0.761473	0.00220577	0.983444	-0.0153993	0.884807	-0.0110687	0.917065	0.0118163	0.911485	-0.0122074
TCGA-SKCM-P(N=101)	-0.260163	0.00860226	-0.299146	0.00237465	-0.216361	0.029769	-0.247661	0.0125245	-0.253059	0.010672	-0.280835	0.00444512	TCGA-STES(N=569)	-0.0986512	0.0185842	-0.0843883	0.0442054	-0.187068	7.05027e-06	-0.113466	0.0067405	0.0147165	0.726122	0.067623	0.107102	0.0497581	0.236002	0.044689	0.287244	-0.21704	1.71109e-07	-0.132804	0.00149852	-0.0524384	0.21168	-0.0306298	0.465879	TCGA-OV(N=417)	-0.182285	0.000182126	-0.134542	0.00592877	-0.143827	0.00324492	-0.129985	0.00786776	-0.176173	0.000300276	-0.144607
TCGA-UVM(N=79)	-0.0968634	0.39576	-0.186699	0.0994579	-0.0949132	0.405386	-0.14814	0.192606	-0.100339	0.378948	-0.167139	0.140949	TCGA-TGCT(N=132)	-0.0397025	0.651279	-0.0976195	0.265469	-0.252416	0.0035016	-0.315159	0.000232574	-0.0504795	0.565416	-0.102076	0.244161	-0.286548	0.000865332	-0.332462	9.83014e-05	-0.235812	0.00648866	-0.23743	0.00612096	-0.295888	0.000571858	-0.274262	0.00146103	TCGA-UVM(N=79)	-0.0968634	0.39576	-0.186699	0.0994579	-0.0949132	0.405386	-0.14814	0.192606	-0.100339	0.378948	-0.167139
TCGA-UCS(N=56)	0.0261523	0.848271	0.0367738	0.787873	-0.198673	0.142138	-0.208612	0.122847	-0.107612	0.429863	-0.0906357	0.506481	TCGA-THCA(N=503)	0.16443	0.000212353	0.161261	0.000281786	0.132023	0.00301109	0.1226	0.005902	0.013763	0.758145	0.00599414	0.893322	0.273889	4.17716e-10	0.262977	2.11117e-09	0.0463825	0.299167	0.0305992	0.49352	0.24028	4.87983e-08	0.226783	2.73724e-07	TCGA-PAAD(N=177)	0.0447846	0.55392	-0.0435191	0.565187	0.032303	0.669503	-0.0706732	0.349916	0.0405093	0.592413	-0.0501629
TCGA-BLCA(N=405)	-0.0393648	0.429493	-0.0303453	0.542563	0.014676	0.768412	0.0346525	0.486791	-0.0130407	0.7936	-0.00128617	0.979414	TCGA-THYM(N=118)	0.687637	7.94006e-18	0.773547	9.98801e-25	0.543723	1.98301e-10	0.571698	1.36537e-11	0.724483	1.82088e-20	0.801268	1.21911e-27	-0.00777243	0.933428	0.00561686	0.951864	-0.284089	0.00182306	-0.210279	0.0222825	0.703284	6.73532e-19	0.746542	2.92267e-22	TCGA-TGCT(N=132)	-0.202492	0.0198855	-0.210516	0.0153989	-0.476995	7.3722e-09	-0.448504	6.92132e-08	-0.466393	1.73745e-08	-0.437612
TCGA-ACC(N=77)	-0.0268957	0.81639	-0.14106	0.221073	-0.111274	0.33532	-0.18227	0.112609	-0.0791699	0.493706	-0.151563	0.188234	TCGA-UCEC(N=178)	-0.0516574	0.493472	-0.105289	0.161896	-0.0929626	0.217124	-0.032678	0.664998	0.0250036	0.740425	0.00866343	0.908626	0.00850847	0.910253	0.0375263	0.61897	-0.0839358	0.265313	-0.0789688	0.294736	0.258391	0.00049693	0.191717	0.0103585	TCGA-UCS(N=56)	0.0261523	0.848271	0.0367738	0.787873	-0.198673	0.142138	-0.208612	0.122847	-0.107612	0.429863	-0.0906357
TCGA-KICH(N=65)	-0.0407678	0.747121	-0.152558	0.225047	-0.190029	0.129472	-0.262459	0.0346747	-0.129917	0.302317	-0.236366	0.0580095	TCGA-UCS(N=56)	-0.0921317	0.49946	-0.0328093	0.810292	0.049158	0.719008	0.100615	0.460619	0.0836105	0.54011	0.065892	0.629455	0.0159684	0.907011	0.102187	0.453606	0.0438572	0.748249	0.0133971	0.921934	-0.181929	0.179609	-0.126931	0.351223	TCGA-LAML(N=214)	0.191034	0.00504587	0.223593	0.000989406	-0.159098	0.0198788	-0.122538	0.0736441	-0.00588686	0.931774	0.0219885
TCGA-CHOL(N=36)	-0.257949	0.128786	-0.220735	0.195771	-0.113388	0.510249	-0.097561	0.571353	-0.177302	0.300906	-0.158054	0.357228	TCGA-UVM(N=79)	0.0464293	0.684512	-0.0528709	0.643536	-0.286968	0.0103429	-0.250282	0.0261061	0.382615	0.000501474	0.449897	3.18588e-05	-0.0302264	0.791444	0.0284214	0.803641	-0.0200304	0.860912	-0.0980829	0.389811	-0.308592	0.00565784	-0.444943	3.98306e-05	TARGET-ALL(N=86)	0.0174427	0.873352	-0.0352756	0.747115	0.138231	0.204354	0.162698	0.134468	0.109974	0.313455	0.0938449
TCGA-DLBC(N=46)	-0.002566	0.986497	-0.0433549	0.77481	-0.00214619	0.988706	-0.0172063	0.909638	-0.00279279	0.985304	-0.0212766	0.888384																										TCGA-PCPG(N=177)	-0.14645	0.0517649	-0.186387	0.0129935	-0.281207	0.000149733	-0.314471	2.01908e-05	-0.224901	0.00261616	-0.264448
																																						TCGA-ACC(N=77)	-0.0268957	0.81639	-0.14106	0.221073	-0.111274	0.33532	-0.18227	0.112609	-0.0791699	0.493706	-0.151563
																																						TARGET-ALL-R(N=99)	-0.228169	0.0231187	-0.200934	0.0461225	-0.241182	0.0161782	-0.256637	0.0103423	-0.255319	0.0107553	-0.250669
																																						TCGA-DLBC(N=46)	-0.002566	0.986497	-0.0433549	0.77481	-0.00214619	0.988706	-0.0172063	0.909638	-0.00279279	0.985304	-0.0212766
																																						TCGA-KICH(N=65)	-0.0407678	0.747121	-0.152558	0.225047	-0.190029	0.129472	-0.262459	0.0346747	-0.129917	0.302317	-0.236366
																																						TCGA-CHOL(N=36)	-0.257949	0.128786	-0.220735	0.195771	-0.113388	0.510249	-0.097561	0.571353	-0.177302	0.300906	-0.158054
[truncated: 26 more columns]
