# Supplementary material for: Pan cancer characterization of genes whose expression has been associated with LINE-1 antisense promoter activity
Source: Mob DNA. 2023 Sep 18;14:13. doi: 10.1186/s13100-023-00300-x (PMC10506190; doi:10.1186/s13100-023-00300-x)
Supplement: Supplementary file 9 — Additional file 9. Table S6. Functional exploration of L1 ASP associated genes in cancer [file 13100_2023_300_MOESM9_ESM.xlsx]

## Sheet: Table S6
Table S6. Functional exploration of L1 ASP associated genes in cancer
primer and siRNA sequences
siRNA name	sense（5'-3'）	antisense（5'-3'）
LINC00491-homo-791	CCUCACUCCAUCACUCUAUTT	AUAGAGUGAUGGAGUGAGGTT
LINC00491-homo-664	CCUGCAAUUGGAGGGAAAUTT	AUUUCCCUCCAAUUGCAGGTT
LINC00491-homo-1573	CCACCUGUGUCAACAUGAGTT	CUCAUGUUGACACAGGUGGTT
primer
LINC00491-F	TCCATGTGGGAGCAATGAGG
LINC00491-R	GGCCTCTTTTGGGGTCTTGA
GAPDH-F	GAGTCAACGGATTTGGTCGT
GAPDH-R	GACAAGCTTCCCGTTCTCAG
