# Supplementary material for: Pan cancer characterization of genes whose expression has been associated with LINE-1 antisense promoter activity
Source: Mob DNA. 2023 Sep 18;14:13. doi: 10.1186/s13100-023-00300-x (PMC10506190; doi:10.1186/s13100-023-00300-x)
Supplement: Supplementary file 10 — Additional file 10. Table S7. Cell Line (CL) CAGE validation of candidate transcripts （adapted from https://pubmed.ncbi.nlm.nih.gov/36973455/）. [file 13100_2023_300_MOESM10_ESM.xlsx]

## Sheet: Table S7
Table S7. Cell Line (CL) CAGE validation of candidate transcripts （ from https://pubmed.ncbi.nlm.nih.gov/36973455/）
TCONS_00002178	LINE	L1	L1PA3	chr1	65544806	65550970	intron_2	LEPR	exon_3	+	DMS 53	0.728341
TCONS_00002178	LINE	L1	L1PA3	chr1	65544806	65550970	intron_2	LEPR	exon_3	+	NCI-H716	0.331511
TCONS_00004305	LINE	L1	L1PA2	chr1	168348862	168354879	Intergenic	XCL1	exon_2	+	DMS 454	13.4476
TCONS_00004305	LINE	L1	L1PA2	chr1	168348862	168354879	Intergenic	XCL1	exon_2	+	NCI-H716	22.4599
TCONS_00004305	LINE	L1	L1PA2	chr1	168348862	168354879	Intergenic	XCL1	exon_2	+	SNU-475	9.58435
TCONS_00004307	LINE	L1	L1PA2	chr1	168348862	168354879	Intergenic	XCL1	exon_1	+	DMS 454	13.4476
TCONS_00004307	LINE	L1	L1PA2	chr1	168348862	168354879	Intergenic	XCL1	exon_1	+	NCI-H716	22.4599
TCONS_00004307	LINE	L1	L1PA2	chr1	168348862	168354879	Intergenic	XCL1	exon_1	+	SNU-475	9.58435
TCONS_00004805	LINE	L1	L1PA3	chr1	196780803	196786955	intron_3	CFHR3	exon_4	+	DMS 454	9.21413
TCONS_00004805	LINE	L1	L1PA3	chr1	196780803	196786955	intron_3	CFHR3	exon_4	+	DMS 53	2.4885
TCONS_00004805	LINE	L1	L1PA3	chr1	196780803	196786955	intron_3	CFHR3	exon_4	+	NCI-H1623	0.419906
TCONS_00004805	LINE	L1	L1PA3	chr1	196780803	196786955	intron_3	CFHR3	exon_4	+	NCI-H2110	0.965082
TCONS_00004805	LINE	L1	L1PA3	chr1	196780803	196786955	intron_3	CFHR3	exon_4	+	NCI-H2228	0.436673
TCONS_00004805	LINE	L1	L1PA3	chr1	196780803	196786955	intron_3	CFHR3	exon_4	+	NCI-H716	9.44806
TCONS_00004805	LINE	L1	L1PA3	chr1	196780803	196786955	intron_3	CFHR3	exon_4	+	NCI-H929	1.75952
TCONS_00004847	LINE	L1	L1PA3	chr1	198309446	198315462	intron_9	NEK7	exon_10	+	NCI-H2110	5.91917
TCONS_00005202	LINE	L1	L1HS	chr1	209913771	209919823	Intergenic	AL022397.1	exon_2	+	DMS 53	0.667646
TCONS_00005332	LINE	L1	L1PB1	chr1	214823074	214824392	Intergenic	KCNK2	exon_2	+	NCI-H1623	9.51788
TCONS_00005349	LINE	L1	L1PA2	chr1	217690492	217696523	intron_5	SPATA17	exon_6	+	DMS 454	9.83671
TCONS_00005349	LINE	L1	L1PA2	chr1	217690492	217696523	intron_5	SPATA17	exon_6	+	NCI-H1623	0.419906
TCONS_00005349	LINE	L1	L1PA2	chr1	217690492	217696523	intron_5	SPATA17	exon_6	+	NCI-H716	9.69669
TCONS_00005349	LINE	L1	L1PA2	chr1	217690492	217696523	intron_5	SPATA17	exon_6	+	SNU-475	3.90473
TCONS_00007519	LINE	L1	L1PA3	chr1	45179944	45182134	intron_1	ZSWIM5	exon_2	-	NCI-H2110	1.02942
TCONS_00007674	LINE	L1	L1PA3	chr1	49257808	49263310	intron_3	AGBL4	exon_4	-	DMS 454	0.933865
TCONS_00007674	LINE	L1	L1PA3	chr1	49257808	49263310	intron_3	AGBL4	exon_4	-	DMS 53	1.51738
TCONS_00007674	LINE	L1	L1PA3	chr1	49257808	49263310	intron_3	AGBL4	exon_4	-	NCI-H1623	0.419906
TCONS_00007687	LINE	L1	L1PA3	chr1	49257178	49257818	intron_3	AGBL4	exon_4	-	DMS 454	0.933865
TCONS_00007687	LINE	L1	L1PA3	chr1	49257178	49257818	intron_3	AGBL4	exon_4	-	DMS 53	1.51738
TCONS_00007687	LINE	L1	L1PA3	chr1	49257178	49257818	intron_3	AGBL4	exon_4	-	NCI-H1623	0.419906
TCONS_00008144	LINE	L1	L1PA3	chr1	75677750	75683758	Intergenic	SLC44A5	exon_2	-	NCI-H716	4.14389
TCONS_00008359	LINE	L1	L1PA3	chr1	91286649	91288366	intron_30	HFM1	exon_31	-	DMS 454	0.933865
TCONS_00008359	LINE	L1	L1PA3	chr1	91286649	91288366	intron_30	HFM1	exon_31	-	NCI-H1623	1.25972
TCONS_00008359	LINE	L1	L1PA3	chr1	91286649	91288366	intron_30	HFM1	exon_31	-	NCI-H2228	0.363894
TCONS_00008359	LINE	L1	L1PA3	chr1	91286649	91288366	intron_30	HFM1	exon_31	-	NCI-H716	1.74043
TCONS_00008359	LINE	L1	L1PA3	chr1	91286649	91288366	intron_30	HFM1	exon_31	-	SNU-475	0.780947
TCONS_00011063	LINE	L1	L1HS	chr1	220245155	220246008	intron_1	RAB3GAP2	exon_2	-	NCI-H716	1.16029
TCONS_00011597	LINE	L1	L1PA3	chr1	245816539	245822560	intron_10	SMYD3	exon_11	-	DMS 454	10.2725
TCONS_00011597	LINE	L1	L1PA3	chr1	245816539	245822560	intron_10	SMYD3	exon_11	-	DMS 53	0.364171
TCONS_00011597	LINE	L1	L1PA3	chr1	245816539	245822560	intron_10	SMYD3	exon_11	-	NCI-H1623	9.79782
TCONS_00011597	LINE	L1	L1PA3	chr1	245816539	245822560	intron_10	SMYD3	exon_11	-	NCI-H2110	25.7999
TCONS_00011597	LINE	L1	L1PA3	chr1	245816539	245822560	intron_10	SMYD3	exon_11	-	NCI-H2228	7.569
TCONS_00011597	LINE	L1	L1PA3	chr1	245816539	245822560	intron_10	SMYD3	exon_11	-	NCI-H716	9.44806
TCONS_00011597	LINE	L1	L1PA3	chr1	245816539	245822560	intron_10	SMYD3	exon_11	-	SNU-475	9.72634
TCONS_00013927	LINE	L1	L1PA2	chr10	115362336	115368543	intron_19	ATRNL1	exon_20	+	DMS 53	0.789036
TCONS_00013927	LINE	L1	L1PA2	chr10	115362336	115368543	intron_19	ATRNL1	exon_20	+	NCI-H1623	0.419906
TCONS_00013927	LINE	L1	L1PA2	chr10	115362336	115368543	intron_19	ATRNL1	exon_20	+	NCI-H929	0.463031
TCONS_00014144	LINE	L1	L1PA2	chr10	125945237	125951250	intron_1	FANK1	exon_2	+	DMS 53	2.06363
TCONS_00014144	LINE	L1	L1PA2	chr10	125945237	125951250	intron_1	FANK1	exon_2	+	NCI-H1623	0.559875
TCONS_00014144	LINE	L1	L1PA2	chr10	125945237	125951250	intron_1	FANK1	exon_2	+	NCI-H2110	2.05884
TCONS_00014144	LINE	L1	L1PA2	chr10	125945237	125951250	intron_1	FANK1	exon_2	+	NCI-H929	0.463031
TCONS_00014144	LINE	L1	L1PA2	chr10	125945237	125951250	intron_1	FANK1	exon_2	+	SNU-475	0.780947
TCONS_00014191	LINE	L1	L1PBa1	chr10	132094162	132095756	Intergenic	JAKMIP3	exon_1	+	NCI-H1623	0.559875
TCONS_00017252	LINE	L1	L1PA2	chr11	14715908	14721938	intron_1	PDE3B	exon_2	+	DMS 53	0.667646
TCONS_00017252	LINE	L1	L1PA2	chr11	14715908	14721938	intron_1	PDE3B	exon_2	+	NCI-H1623	2.2395
TCONS_00017252	LINE	L1	L1PA2	chr11	14715908	14721938	intron_1	PDE3B	exon_2	+	NCI-H2110	4.76107
TCONS_00017252	LINE	L1	L1PA2	chr11	14715908	14721938	intron_1	PDE3B	exon_2	+	NCI-H716	0.994533
TCONS_00017459	LINE	L1	L1PA3	chr11	26451095	26457233	intron_3	ANO3	exon_4	+	DMS 53	1.33529
TCONS_00017459	LINE	L1	L1PA3	chr11	26451095	26457233	intron_3	ANO3	exon_4	+	SK-MEL-2	0.493972
TCONS_00019366	LINE	L1	L1PA2	chr11	87047304	87053192	intron_1	TMEM135	exon_2	+	NCI-H1623	4.05909
TCONS_00019481	LINE	L1	L1PA2	chr11	94036857	94042888	intron_1	HEPHL1	exon_2	+	NCI-H1623	0.559875
TCONS_00019481	LINE	L1	L1PA2	chr11	94036857	94042888	intron_1	HEPHL1	exon_2	+	NCI-H929	0.370425
TCONS_00019557	LINE	L1	L1PA2	chr11	100285746	100291751	intron_17	CNTN5	exon_18	+	DMS 53	2.79197
TCONS_00019557	LINE	L1	L1PA2	chr11	100285746	100291751	intron_17	CNTN5	exon_18	+	NCI-H1623	6.2986
TCONS_00019557	LINE	L1	L1PA2	chr11	100285746	100291751	intron_17	CNTN5	exon_18	+	NCI-H716	0.580144
TCONS_00019557	LINE	L1	L1PA2	chr11	100285746	100291751	intron_17	CNTN5	exon_18	+	NCI-H929	0.370425
TCONS_00019606	LINE	L1	L1PA2	chr11	102369166	102375192	intron_6	BIRC2	exon_7	+	DMS 53	0.728341
TCONS_00019606	LINE	L1	L1PA2	chr11	102369166	102375192	intron_6	BIRC2	exon_7	+	NCI-H2110	0.386033
TCONS_00019606	LINE	L1	L1PA2	chr11	102369166	102375192	intron_6	BIRC2	exon_7	+	NCI-H2228	0.436673
TCONS_00021188	LINE	L1	L1PA2	chr11	26965118	26971134	Intergenic	SLC5A12	exon_2	-	DMS 454	0.809349
TCONS_00021188	LINE	L1	L1PA2	chr11	26965118	26971134	Intergenic	SLC5A12	exon_2	-	DMS 53	2.00294
TCONS_00021188	LINE	L1	L1PA2	chr11	26965118	26971134	Intergenic	SLC5A12	exon_2	-	NCI-H1623	1.53966
TCONS_00021188	LINE	L1	L1PA2	chr11	26965118	26971134	Intergenic	SLC5A12	exon_2	-	NCI-H2228	0.436673
TCONS_00021188	LINE	L1	L1PA2	chr11	26965118	26971134	Intergenic	SLC5A12	exon_2	-	NCI-H716	9.94533
TCONS_00021188	LINE	L1	L1PA2	chr11	26965118	26971134	Intergenic	SLC5A12	exon_2	-	SK-MEL-2	0.308733
TCONS_00021188	LINE	L1	L1PA2	chr11	26965118	26971134	Intergenic	SLC5A12	exon_2	-	SNU-475	1.70388
TCONS_00023733	LINE	L1	L1HS	chr11	125536609	125542640	Intergenic	FEZ1	exon_2	-	DMS 53	0.364171
TCONS_00023733	LINE	L1	L1HS	chr11	125536609	125542640	Intergenic	FEZ1	exon_2	-	NCI-H1623	6.85847
TCONS_00023733	LINE	L1	L1HS	chr11	125536609	125542640	Intergenic	FEZ1	exon_2	-	NCI-H929	8.98281
TCONS_00024049	LINE	L1	L1PA3	chr12	3392214	3398233	Intergenic	PRMT8	exon_2	+	DMS 53	18.9976
TCONS_00024633	LINE	L1	L1PA3	chr12	20667835	20673859	intron_15	PDE3A	exon_16	+	NCI-H1623	0.419906
TCONS_00024655	LINE	L1	L1P1	chr12	21083799	21088613	intron_12	SLCO1B7	exon_13	+	DMS 53	0.728341
TCONS_00024659	LINE	L1	L1PA2	chr12	21209060	21215087	intron_11	SLCO1B1	exon_12	+	DMS 454	7.22189
TCONS_00024659	LINE	L1	L1PA2	chr12	21209060	21215087	intron_11	SLCO1B1	exon_12	+	DMS 53	17.905
TCONS_00024659	LINE	L1	L1PA2	chr12	21209060	21215087	intron_11	SLCO1B1	exon_12	+	NCI-H1623	3.35925
TCONS_00024659	LINE	L1	L1PA2	chr12	21209060	21215087	intron_11	SLCO1B1	exon_12	+	SK-MEL-2	0.679212
TCONS_00025516	LINE	L1	L1HS	chr12	54788573	54794627	Intergenic	MUCL1	exon_1	+	DMS 53	2.73128
TCONS_00025516	LINE	L1	L1HS	chr12	54788573	54794627	Intergenic	MUCL1	exon_1	+	NCI-H1623	1.95956
TCONS_00026795	LINE	L1	L1ME1	chr12	112834017	112834959	intron_3	RPH3A	exon_4	+	SK-MEL-2	4.44575
TCONS_00027919	LINE	L1	L1PA2	chr12	11297656	11303685	Intergenic	PRB3	exon_1	-	DMS 454	0.311288
TCONS_00027919	LINE	L1	L1PA2	chr12	11297656	11303685	Intergenic	PRB3	exon_1	-	DMS 53	0.546256
TCONS_00027919	LINE	L1	L1PA2	chr12	11297656	11303685	Intergenic	PRB3	exon_1	-	NCI-H1623	1.67963
TCONS_00028130	LINE	L1	L1PB1	chr12	22436582	22442671	Intergenic	ST8SIA1	exon_2	-	NCI-H1623	7.97822
TCONS_00028130	LINE	L1	L1PB1	chr12	22436582	22442671	Intergenic	ST8SIA1	exon_2	-	NCI-H2110	0.707727
TCONS_00028130	LINE	L1	L1PB1	chr12	22436582	22442671	Intergenic	ST8SIA1	exon_2	-	NCI-H2228	0.363894
TCONS_00028130	LINE	L1	L1PB1	chr12	22436582	22442671	Intergenic	ST8SIA1	exon_2	-	SNU-475	1.27791
TCONS_00028487	LINE	L1	L1PA3	chr12	44681417	44687432	intron_12	NELL2	exon_13	-	DMS 53	0.364171
TCONS_00028487	LINE	L1	L1PA3	chr12	44681417	44687432	intron_12	NELL2	exon_13	-	NCI-H1623	2.37947
TCONS_00028492	LINE	L1	L1PA2	chr12	44950958	44956988	Intergenic	NELL2	exon_1	-	DMS 454	0.498061
TCONS_00028492	LINE	L1	L1PA2	chr12	44950958	44956988	Intergenic	NELL2	exon_1	-	DMS 53	5.21978
TCONS_00028492	LINE	L1	L1PA2	chr12	44950958	44956988	Intergenic	NELL2	exon_1	-	NCI-H1623	0.699844
TCONS_00031384	LINE	L1	L1PA3	chr13	45664064	45670213	Intergenic	SPERT	exon_3	+	DMS 53	1.39599
TCONS_00031384	LINE	L1	L1PA3	chr13	45664064	45670213	Intergenic	SPERT	exon_3	+	NCI-H1623	1.39969
TCONS_00031384	LINE	L1	L1PA3	chr13	45664064	45670213	Intergenic	SPERT	exon_3	+	NCI-H2110	0.836405
TCONS_00031384	LINE	L1	L1PA3	chr13	45664064	45670213	Intergenic	SPERT	exon_3	+	NCI-H2228	0.582231
TCONS_00031384	LINE	L1	L1PA3	chr13	45664064	45670213	Intergenic	SPERT	exon_3	+	NCI-H716	0.828777
TCONS_00031699	LINE	L1	L1PA3	chr13	75727624	75733777	intron_4	LMO7	exon_5	+	NCI-H2110	12.9321
TCONS_00032566	LINE	L1	L1PA2	chr13	39000817	39006875	Intergenic	STOML3	exon_1	-	DMS 454	1.30741
TCONS_00032566	LINE	L1	L1PA2	chr13	39000817	39006875	Intergenic	STOML3	exon_1	-	DMS 53	15.4166
TCONS_00032566	LINE	L1	L1PA2	chr13	39000817	39006875	Intergenic	STOML3	exon_1	-	NCI-H1623	17.2162
TCONS_00032566	LINE	L1	L1PA2	chr13	39000817	39006875	Intergenic	STOML3	exon_1	-	NCI-H2110	18.2722
TCONS_00032566	LINE	L1	L1PA2	chr13	39000817	39006875	Intergenic	STOML3	exon_1	-	NCI-H716	3.89525
TCONS_00034455	LINE	L1	L1PA2	chr14	59946504	59952523	intron_8	LRRC9	exon_9	+	DMS 454	0.871607
TCONS_00034455	LINE	L1	L1PA2	chr14	59946504	59952523	intron_8	LRRC9	exon_9	+	DMS 53	1.88155
TCONS_00034455	LINE	L1	L1PA2	chr14	59946504	59952523	intron_8	LRRC9	exon_9	+	NCI-H1623	2.09953
TCONS_00034455	LINE	L1	L1PA2	chr14	59946504	59952523	intron_8	LRRC9	exon_9	+	NCI-H2110	0.836405
TCONS_00034455	LINE	L1	L1PA2	chr14	59946504	59952523	intron_8	LRRC9	exon_9	+	NCI-H716	2.15482
TCONS_00034669	LINE	L1	L1PA3	chr14	67868071	67874097	intron_5	RAD51B	exon_6	+	NCI-H1623	0.699844
TCONS_00034669	LINE	L1	L1PA3	chr14	67868071	67874097	intron_5	RAD51B	exon_6	+	NCI-H2110	0.836405
TCONS_00034780	LINE	L1	L1PA2	chr14	71842964	71848996	Intergenic	RGS6	exon_2	+	COV413A	3.10596
TCONS_00034780	LINE	L1	L1PA2	chr14	71842964	71848996	Intergenic	RGS6	exon_2	+	DMS 454	0.373546
TCONS_00034780	LINE	L1	L1PA2	chr14	71842964	71848996	Intergenic	RGS6	exon_2	+	NCI-H2110	2.44488
TCONS_00034780	LINE	L1	L1PA2	chr14	71842964	71848996	Intergenic	RGS6	exon_2	+	NCI-H2228	8.66069
TCONS_00034780	LINE	L1	L1PA2	chr14	71842964	71848996	Intergenic	RGS6	exon_2	+	NCI-H929	4.81553
TCONS_00035042	LINE	L1	L1HS	chr14	79308933	79314061	intron_14	NRXN3	exon_15	+	DMS 53	0.424866
TCONS_00035042	LINE	L1	L1HS	chr14	79308933	79314061	intron_14	NRXN3	exon_15	+	NCI-H1623	0.419906
TCONS_00036762	LINE	L1	L1PA2	chr14	58032539	58038561	intron_5	C14orf37	exon_6	-	DMS 454	4.91835
TCONS_00036762	LINE	L1	L1PA2	chr14	58032539	58038561	intron_5	C14orf37	exon_6	-	DMS 53	5.76603
TCONS_00036762	LINE	L1	L1PA2	chr14	58032539	58038561	intron_5	C14orf37	exon_6	-	NCI-H1623	15.8165
TCONS_00036762	LINE	L1	L1PA2	chr14	58032539	58038561	intron_5	C14orf37	exon_6	-	NCI-H2110	13.5755
TCONS_00037446	LINE	L1	L1PA2	chr14	91430864	91436893	Intergenic	CCDC88C	exon_2	-	DMS 53	2.36711
TCONS_00037446	LINE	L1	L1PA2	chr14	91430864	91436893	Intergenic	CCDC88C	exon_2	-	NCI-H1623	0.699844
TCONS_00037446	LINE	L1	L1PA2	chr14	91430864	91436893	Intergenic	CCDC88C	exon_2	-	NCI-H716	3.14935
TCONS_00037446	LINE	L1	L1PA2	chr14	91430864	91436893	Intergenic	CCDC88C	exon_2	-	SNU-475	0.851942
TCONS_00039044	LINE	L1	L1PA3	chr15	51031621	51037649	Intergenic	GLDN	exon_2	+	DMS 454	1.55644
TCONS_00039044	LINE	L1	L1PA3	chr15	51031621	51037649	Intergenic	GLDN	exon_2	+	DMS 53	2.54919
TCONS_00039044	LINE	L1	L1PA3	chr15	51031621	51037649	Intergenic	GLDN	exon_2	+	NCI-H1623	2.37947
TCONS_00039044	LINE	L1	L1PA3	chr15	51031621	51037649	Intergenic	GLDN	exon_2	+	NCI-H2110	5.01843
TCONS_00039044	LINE	L1	L1PA3	chr15	51031621	51037649	Intergenic	GLDN	exon_2	+	NCI-H2228	2.54726
TCONS_00039044	LINE	L1	L1PA3	chr15	51031621	51037649	Intergenic	GLDN	exon_2	+	NCI-H716	9.11655
TCONS_00039044	LINE	L1	L1PA3	chr15	51031621	51037649	Intergenic	GLDN	exon_2	+	SNU-475	3.33677
TCONS_00039594	LINE	L1	L1PA2	chr15	73508419	73514470	intron_2	REC114	exon_3	+	NCI-H1623	0.419906
TCONS_00042253	LINE	L1	L1HS	chr15	82882881	82888919	intron_2	HOMER2	exon_3	-	DMS 53	0.606951
TCONS_00042253	LINE	L1	L1HS	chr15	82882881	82888919	intron_2	HOMER2	exon_3	-	NCI-H1623	2.09953
TCONS_00047318	LINE	L1	L1PA2	chr16	61782078	61788101	intron_8	CDH8	exon_9	-	NCI-H1623	0.419906
TCONS_00047319	LINE	L1	L1PA2	chr16	61801455	61807489	intron_7	CDH8	exon_8	-	DMS 53	0.424866
TCONS_00048584	LINE	L1	L1HS	chr17	9615985	9622015	intron_8	CFAP52	exon_9	+	DMS 53	2.67058
TCONS_00048584	LINE	L1	L1HS	chr17	9615985	9622015	intron_8	CFAP52	exon_9	+	NCI-H1623	22.8149
TCONS_00048584	LINE	L1	L1HS	chr17	9615985	9622015	intron_8	CFAP52	exon_9	+	NCI-H2110	16.2777
TCONS_00053102	LINE	L1	L1PA2	chr17	41200867	41206900	Intergenic	KRTAP4-1	exon_1	-	DMS 53	2.4885
TCONS_00053102	LINE	L1	L1PA2	chr17	41200867	41206900	Intergenic	KRTAP4-1	exon_1	-	NCI-H1623	9.93778
TCONS_00053102	LINE	L1	L1PA2	chr17	41200867	41206900	Intergenic	KRTAP4-1	exon_1	-	NCI-H2110	3.73165
TCONS_00053102	LINE	L1	L1PA2	chr17	41200867	41206900	Intergenic	KRTAP4-1	exon_1	-	NCI-H2228	3.85728
TCONS_00053102	LINE	L1	L1PA2	chr17	41200867	41206900	Intergenic	KRTAP4-1	exon_1	-	NCI-H716	0.331511
TCONS_00055478	LINE	L1	L1PA2	chr18	34552378	34558395	Intergenic	DTNA	exon_2	+	COV413A	0.660843
TCONS_00055478	LINE	L1	L1PA2	chr18	34552378	34558395	Intergenic	DTNA	exon_2	+	DMS 454	15.5022
TCONS_00055478	LINE	L1	L1PA2	chr18	34552378	34558395	Intergenic	DTNA	exon_2	+	DMS 53	4.9163
TCONS_00055478	LINE	L1	L1PA2	chr18	34552378	34558395	Intergenic	DTNA	exon_2	+	NCI-H1623	2.65941
TCONS_00055478	LINE	L1	L1PA2	chr18	34552378	34558395	Intergenic	DTNA	exon_2	+	NCI-H2110	0.707727
TCONS_00055478	LINE	L1	L1PA2	chr18	34552378	34558395	Intergenic	DTNA	exon_2	+	NCI-H716	9.36518
TCONS_00055478	LINE	L1	L1PA2	chr18	34552378	34558395	Intergenic	DTNA	exon_2	+	SNU-475	2.48483
TCONS_00055762	LINE	L1	L1PA3	chr18	53511450	53517443	intron_27	DCC	exon_28	+	DMS 53	1.69946
TCONS_00055762	LINE	L1	L1PA3	chr18	53511450	53517443	intron_27	DCC	exon_28	+	NCI-H1623	0.839813
TCONS_00055762	LINE	L1	L1PA3	chr18	53511450	53517443	intron_27	DCC	exon_28	+	SK-MEL-2	1.11144
TCONS_00055996	LINE	L1	L1PA2	chr18	68784834	68790853	Intergenic	CCDC102B	exon_2	+	DMS 53	22.6393
TCONS_00055996	LINE	L1	L1PA2	chr18	68784834	68790853	Intergenic	CCDC102B	exon_2	+	NCI-H1623	3.07931
TCONS_00055996	LINE	L1	L1PA2	chr18	68784834	68790853	Intergenic	CCDC102B	exon_2	+	NCI-H716	4.88979
TCONS_00055996	LINE	L1	L1PA2	chr18	68784834	68790853	Intergenic	CCDC102B	exon_2	+	SNU-475	3.76274
TCONS_00056121	LINE	L1	L1PA3	chr18	79284621	79290766	intron_13	ATP9B	exon_14	+	NCI-H716	0.331511
TCONS_00064855	LINE	L1	L1PA3	chr2	3369246	3375395	Intergenic	TRAPPC12	exon_2	+	DMS 53	1.94224
TCONS_00064855	LINE	L1	L1PA3	chr2	3369246	3375395	Intergenic	TRAPPC12	exon_2	+	NCI-H1623	5.87869
TCONS_00064855	LINE	L1	L1PA3	chr2	3369246	3375395	Intergenic	TRAPPC12	exon_2	+	NCI-H2110	1.80149
TCONS_00064855	LINE	L1	L1PA3	chr2	3369246	3375395	Intergenic	TRAPPC12	exon_2	+	NCI-H2228	1.3828
TCONS_00064855	LINE	L1	L1PA3	chr2	3369246	3375395	Intergenic	TRAPPC12	exon_2	+	SNU-475	0.638956
TCONS_00065096	LINE	L1	L1PB1	chr2	17888673	17893931	intron_1	KCNS3	exon_2	+	NCI-H2110	0.514711
TCONS_00065522	LINE	L1	L1PA7	chr2	37956656	37963165	intron_2	RMDN2	exon_3	+	NCI-H2228	4.00284
TCONS_00065617	LINE	L1	L1PA2	chr2	43660471	43666500	intron_2	PLEKHH2	exon_3	+	DMS 53	1.2746
TCONS_00065617	LINE	L1	L1PA2	chr2	43660471	43666500	intron_2	PLEKHH2	exon_3	+	NCI-H716	0.911655
TCONS_00065617	LINE	L1	L1PA2	chr2	43660471	43666500	intron_2	PLEKHH2	exon_3	+	NCI-H929	0.370425
TCONS_00066035	LINE	L1	L1PB1	chr2	68519677	68521418	intron_5	APLF	exon_6	+	NCI-H716	0.414389
TCONS_00066778	LINE	L1	L1HS	chr2	102566355	102572385	Intergenic	SLC9A2	exon_2	+	NCI-H1623	0.419906
TCONS_00067201	LINE	L1	L1PA2	chr2	124407870	124413893	intron_3	CNTNAP5	exon_4	+	DMS 454	0.809349
TCONS_00067201	LINE	L1	L1PA2	chr2	124407870	124413893	intron_3	CNTNAP5	exon_4	+	DMS 53	7.04063
TCONS_00067201	LINE	L1	L1PA2	chr2	124407870	124413893	intron_3	CNTNAP5	exon_4	+	NCI-H1623	5.87869
TCONS_00067201	LINE	L1	L1PA2	chr2	124407870	124413893	intron_3	CNTNAP5	exon_4	+	NCI-H716	4.14389
TCONS_00067201	LINE	L1	L1PA2	chr2	124407870	124413893	intron_3	CNTNAP5	exon_4	+	SK-MEL-2	0.308733
TCONS_00067476	LINE	L1	L1PA3	chr2	142806275	142812293	Intergenic	KYNU	exon_2	+	DMS 53	1.45668
TCONS_00067476	LINE	L1	L1PA3	chr2	142806275	142812293	Intergenic	KYNU	exon_2	+	NCI-H1623	32.1928
TCONS_00067476	LINE	L1	L1PA3	chr2	142806275	142812293	Intergenic	KYNU	exon_2	+	NCI-H2110	47.096
TCONS_00067476	LINE	L1	L1PA3	chr2	142806275	142812293	Intergenic	KYNU	exon_2	+	NCI-H2228	34.0605
TCONS_00067476	LINE	L1	L1PA3	chr2	142806275	142812293	Intergenic	KYNU	exon_2	+	NCI-H716	29.5045
TCONS_00067476	LINE	L1	L1PA3	chr2	142806275	142812293	Intergenic	KYNU	exon_2	+	NCI-H929	0.833456
TCONS_00067476	LINE	L1	L1PA3	chr2	142806275	142812293	Intergenic	KYNU	exon_2	+	SK-MEL-2	0.308733
TCONS_00067490	LINE	L1	L1PA2	chr2	143006042	143012076	intron_10	KYNU	exon_11	+	DMS 53	4.37005
TCONS_00067490	LINE	L1	L1PA2	chr2	143006042	143012076	intron_10	KYNU	exon_11	+	NCI-H2110	4.82541
TCONS_00067490	LINE	L1	L1PA2	chr2	143006042	143012076	intron_10	KYNU	exon_11	+	NCI-H929	0.463031
TCONS_00067759	LINE	L1	L1PA2	chr2	165485934	165491963	intron_1	CSRNP3	exon_2	+	NCI-H1623	2.51944
TCONS_00069056	LINE	L1	L1HS	chr2	230337069	230342513	intron_2	SP140L	exon_3	+	DMS 454	21.1053
TCONS_00069056	LINE	L1	L1HS	chr2	230337069	230342513	intron_2	SP140L	exon_3	+	DMS 53	17.3588
TCONS_00069056	LINE	L1	L1HS	chr2	230337069	230342513	intron_2	SP140L	exon_3	+	NCI-H2110	15.763
TCONS_00069056	LINE	L1	L1HS	chr2	230337069	230342513	intron_2	SP140L	exon_3	+	NCI-H2228	5.45842
TCONS_00069056	LINE	L1	L1HS	chr2	230337069	230342513	intron_2	SP140L	exon_3	+	NCI-H716	44.754
TCONS_00069056	LINE	L1	L1HS	chr2	230337069	230342513	intron_2	SP140L	exon_3	+	SNU-475	22.7894
TCONS_00069058	LINE	L1	L1PA10	chr2	230342499	230343082	intron_2	SP140L	exon_3	+	DMS 454	21.1053
TCONS_00069058	LINE	L1	L1PA10	chr2	230342499	230343082	intron_2	SP140L	exon_3	+	DMS 53	17.3588
TCONS_00069058	LINE	L1	L1PA10	chr2	230342499	230343082	intron_2	SP140L	exon_3	+	NCI-H2110	15.763
TCONS_00069058	LINE	L1	L1PA10	chr2	230342499	230343082	intron_2	SP140L	exon_3	+	NCI-H2228	5.45842
TCONS_00069058	LINE	L1	L1PA10	chr2	230342499	230343082	intron_2	SP140L	exon_3	+	NCI-H716	44.754
TCONS_00069058	LINE	L1	L1PA10	chr2	230342499	230343082	intron_2	SP140L	exon_3	+	SNU-475	22.7894
TCONS_00070999	LINE	L1	L1PA3	chr2	77592831	77598845	Intergenic	LRRTM4	exon_2	-	DMS 53	0.667646
TCONS_00071958	LINE	L1	L1PA2	chr2	133546865	133552758	intron_2	NCKAP5	exon_3	-	NCI-H1623	1.11975
TCONS_00072227	LINE	L1	L1HS	chr2	157566353	157572377	intron_2	ACVR1C	exon_3	-	DMS 53	5.82673
TCONS_00072227	LINE	L1	L1HS	chr2	157566353	157572377	intron_2	ACVR1C	exon_3	-	NCI-H1623	2.93934
TCONS_00072227	LINE	L1	L1HS	chr2	157566353	157572377	intron_2	ACVR1C	exon_3	-	NCI-H716	1.07741
TCONS_00072227	LINE	L1	L1HS	chr2	157566353	157572377	intron_2	ACVR1C	exon_3	-	NCI-H929	1.01867
TCONS_00072895	LINE	L1	L1PA2	chr2	196521488	196527500	intron_1	HECW2	exon_2	-	DMS 454	0.373546
TCONS_00072895	LINE	L1	L1PA2	chr2	196521488	196527500	intron_1	HECW2	exon_2	-	DMS 53	1.45668
TCONS_00072895	LINE	L1	L1PA2	chr2	196521488	196527500	intron_1	HECW2	exon_2	-	NCI-H1623	0.979782
TCONS_00072895	LINE	L1	L1PA2	chr2	196521488	196527500	intron_1	HECW2	exon_2	-	NCI-H2110	1.09376
TCONS_00072895	LINE	L1	L1PA2	chr2	196521488	196527500	intron_1	HECW2	exon_2	-	NCI-H2228	1.0189
TCONS_00072895	LINE	L1	L1PA2	chr2	196521488	196527500	intron_1	HECW2	exon_2	-	NCI-H716	0.828777
TCONS_00072895	LINE	L1	L1PA2	chr2	196521488	196527500	intron_1	HECW2	exon_2	-	SK-MEL-2	0.740958
TCONS_00072895	LINE	L1	L1PA2	chr2	196521488	196527500	intron_1	HECW2	exon_2	-	SNU-475	0.709952
TCONS_00072934	LINE	L1	L1PA2	chr2	197634735	197640761	intron_3	RFTN2	exon_4	-	NCI-H1623	0.699844
TCONS_00072934	LINE	L1	L1PA2	chr2	197634735	197640761	intron_3	RFTN2	exon_4	-	NCI-H716	3.89525
TCONS_00072934	LINE	L1	L1PA2	chr2	197634735	197640761	intron_3	RFTN2	exon_4	-	SNU-475	12.1402
TCONS_00073854	LINE	L1	L1M2	chr20	128695	129957	Intergenic	DEFB126	exon_2	+	DMS 454	0.871607
TCONS_00073854	LINE	L1	L1M2	chr20	128695	129957	Intergenic	DEFB126	exon_2	+	DMS 53	3.09545
TCONS_00073854	LINE	L1	L1M2	chr20	128695	129957	Intergenic	DEFB126	exon_2	+	NCI-H1623	29.6734
TCONS_00073854	LINE	L1	L1M2	chr20	128695	129957	Intergenic	DEFB126	exon_2	+	NCI-H2110	0.707727
TCONS_00073854	LINE	L1	L1M2	chr20	128695	129957	Intergenic	DEFB126	exon_2	+	NCI-H716	0.828777
TCONS_00073854	LINE	L1	L1M2	chr20	128695	129957	Intergenic	DEFB126	exon_2	+	SK-MEL-2	1.29668
TCONS_00073854	LINE	L1	L1M2	chr20	128695	129957	Intergenic	DEFB126	exon_2	+	SNU-475	0.354976
TCONS_00074070	LINE	L1	L1PA3	chr20	8108866	8114917	Intergenic	PLCB1	exon_1	+	DMS 454	45.6348
TCONS_00074070	LINE	L1	L1PA3	chr20	8108866	8114917	Intergenic	PLCB1	exon_1	+	DMS 53	64.0333
TCONS_00074070	LINE	L1	L1PA3	chr20	8108866	8114917	Intergenic	PLCB1	exon_1	+	NCI-H1623	26.4541
TCONS_00074070	LINE	L1	L1PA3	chr20	8108866	8114917	Intergenic	PLCB1	exon_1	+	NCI-H2110	19.6233
TCONS_00074070	LINE	L1	L1PA3	chr20	8108866	8114917	Intergenic	PLCB1	exon_1	+	NCI-H2228	1.96503
TCONS_00074070	LINE	L1	L1PA3	chr20	8108866	8114917	Intergenic	PLCB1	exon_1	+	NCI-H716	13.0947
TCONS_00074070	LINE	L1	L1PA3	chr20	8108866	8114917	Intergenic	PLCB1	exon_1	+	NCI-H929	6.29723
TCONS_00074070	LINE	L1	L1PA3	chr20	8108866	8114917	Intergenic	PLCB1	exon_1	+	SK-MEL-2	4.87797
TCONS_00074070	LINE	L1	L1PA3	chr20	8108866	8114917	Intergenic	PLCB1	exon_1	+	SNU-475	7.45449
TCONS_00074071	LINE	L1	L1PA3	chr20	8108866	8114917	Intergenic	PLCB1	exon_3	+	DMS 454	45.6348
TCONS_00074071	LINE	L1	L1PA3	chr20	8108866	8114917	Intergenic	PLCB1	exon_3	+	DMS 53	64.0333
TCONS_00074071	LINE	L1	L1PA3	chr20	8108866	8114917	Intergenic	PLCB1	exon_3	+	NCI-H1623	26.4541
TCONS_00074071	LINE	L1	L1PA3	chr20	8108866	8114917	Intergenic	PLCB1	exon_3	+	NCI-H2110	19.6233
TCONS_00074071	LINE	L1	L1PA3	chr20	8108866	8114917	Intergenic	PLCB1	exon_3	+	NCI-H2228	1.96503
TCONS_00074071	LINE	L1	L1PA3	chr20	8108866	8114917	Intergenic	PLCB1	exon_3	+	NCI-H716	13.0947
TCONS_00074071	LINE	L1	L1PA3	chr20	8108866	8114917	Intergenic	PLCB1	exon_3	+	NCI-H929	6.29723
TCONS_00074071	LINE	L1	L1PA3	chr20	8108866	8114917	Intergenic	PLCB1	exon_3	+	SK-MEL-2	4.87797
TCONS_00074071	LINE	L1	L1PA3	chr20	8108866	8114917	Intergenic	PLCB1	exon_3	+	SNU-475	7.45449
TCONS_00074318	LINE	L1	L1HS	chr20	23426108	23432140	Intergenic	CSTL1	exon_1	+	DMS 454	0.498061
TCONS_00074318	LINE	L1	L1HS	chr20	23426108	23432140	Intergenic	CSTL1	exon_1	+	DMS 53	8.92218
TCONS_00074318	LINE	L1	L1HS	chr20	23426108	23432140	Intergenic	CSTL1	exon_1	+	NCI-H1623	7.69828
TCONS_00074318	LINE	L1	L1HS	chr20	23426108	23432140	Intergenic	CSTL1	exon_1	+	NCI-H2110	10.1655
TCONS_00074318	LINE	L1	L1HS	chr20	23426108	23432140	Intergenic	CSTL1	exon_1	+	NCI-H2228	0.800568
TCONS_00074318	LINE	L1	L1HS	chr20	23426108	23432140	Intergenic	CSTL1	exon_1	+	NCI-H716	3.97813
TCONS_00078500	LINE	L1	L1M3f	chr21	43619369	43620416	intron_6	HSF2BP	exon_7	-	NCI-H1623	3.77916
TCONS_00078500	LINE	L1	L1M3f	chr21	43619369	43620416	intron_6	HSF2BP	exon_7	-	NCI-H2110	3.4743
TCONS_00078749	LINE	L1	L1M3de	chr22	18164134	18165146	intron_4	USP18	exon_5	+	DMS 454	39.3468
TCONS_00078749	LINE	L1	L1M3de	chr22	18164134	18165146	intron_4	USP18	exon_5	+	DMS 53	22.1537
TCONS_00080381	LINE	L1	L1M3de	chr22	20372309	20373771	intron_7	USP41	exon_8	-	DMS 454	24.4673
TCONS_00080381	LINE	L1	L1M3de	chr22	20372309	20373771	intron_7	USP41	exon_8	-	DMS 53	6.73715
TCONS_00081939	LINE	L1	L1PA2	chr3	19370610	19376625	intron_5	KCNH8	exon_6	+	DMS 454	0.809349
TCONS_00081939	LINE	L1	L1PA2	chr3	19370610	19376625	intron_5	KCNH8	exon_6	+	DMS 53	0.546256
TCONS_00081939	LINE	L1	L1PA2	chr3	19370610	19376625	intron_5	KCNH8	exon_6	+	NCI-H1623	1.25972
TCONS_00082462	LINE	L1	L1PA12	chr3	46161736	46164342	Intergenic	CCR3	exon_1	+	NCI-H1623	4.479
TCONS_00082462	LINE	L1	L1PA12	chr3	46161736	46164342	Intergenic	CCR3	exon_1	+	NCI-H2110	0.386033
TCONS_00082462	LINE	L1	L1PA12	chr3	46161736	46164342	Intergenic	CCR3	exon_1	+	NCI-H929	0.74085
TCONS_00082833	LINE	L1	L1PA2	chr3	55046104	55052129	intron_35	CACNA2D3	exon_36	+	DMS 53	0.546256
TCONS_00083159	LINE	L1	L1HS	chr3	89460825	89466856	intron_15	EPHA3	exon_16	+	NCI-H716	0.414389
TCONS_00083414	LINE	L1	L1PA2	chr3	111556203	111562234	intron_2	CD96	exon_3	+	DMS 454	0.435803
TCONS_00083414	LINE	L1	L1PA2	chr3	111556203	111562234	intron_2	CD96	exon_3	+	DMS 53	1.51738
TCONS_00083414	LINE	L1	L1PA2	chr3	111556203	111562234	intron_2	CD96	exon_3	+	NCI-H1623	2.79938
TCONS_00083414	LINE	L1	L1PA2	chr3	111556203	111562234	intron_2	CD96	exon_3	+	SK-MEL-2	0.432226
TCONS_00083511	LINE	L1	L1PA3	chr3	114276891	114282906	Intergenic	TIGIT	exon_3	+	NCI-H1623	2.09953
TCONS_00083512	LINE	L1	L1PA3	chr3	114276891	114282906	Intergenic	TIGIT	exon_2	+	NCI-H1623	2.09953
TCONS_00083513	LINE	L1	L1PA3	chr3	114276891	114282906	Intergenic	TIGIT	exon_1	+	NCI-H1623	2.09953
TCONS_00083625	LINE	L1	L1PA3	chr3	121932760	121938786	intron_19	SLC15A2	exon_20	+	DMS 454	3.05062
TCONS_00083625	LINE	L1	L1PA3	chr3	121932760	121938786	intron_19	SLC15A2	exon_20	+	DMS 53	2.4278
TCONS_00083625	LINE	L1	L1PA3	chr3	121932760	121938786	intron_19	SLC15A2	exon_20	+	NCI-H1623	6.85847
TCONS_00083625	LINE	L1	L1PA3	chr3	121932760	121938786	intron_19	SLC15A2	exon_20	+	NCI-H2110	8.87876
TCONS_00083625	LINE	L1	L1PA3	chr3	121932760	121938786	intron_19	SLC15A2	exon_20	+	NCI-H2228	1.16446
TCONS_00083625	LINE	L1	L1PA3	chr3	121932760	121938786	intron_19	SLC15A2	exon_20	+	SK-MEL-2	0.926198
TCONS_00083631	LINE	L1	L1PA2	chr3	122041911	122047938	Intergenic	CD86	exon_2	+	DMS 53	0.303475
TCONS_00083902	LINE	L1	L1PA2	chr3	132371232	132377261	Intergenic	DNAJC13	exon_2	+	DMS 454	1.68096
TCONS_00083902	LINE	L1	L1PA2	chr3	132371232	132377261	Intergenic	DNAJC13	exon_2	+	DMS 53	2.30641
TCONS_00083902	LINE	L1	L1PA2	chr3	132371232	132377261	Intergenic	DNAJC13	exon_2	+	NCI-H1623	2.93934
TCONS_00083902	LINE	L1	L1PA2	chr3	132371232	132377261	Intergenic	DNAJC13	exon_2	+	NCI-H2110	0.772066
TCONS_00083902	LINE	L1	L1PA2	chr3	132371232	132377261	Intergenic	DNAJC13	exon_2	+	NCI-H716	2.40345
TCONS_00084012	LINE	L1	L1HS	chr3	136963693	136969736	intron_1	IL20RB	exon_2	+	DMS 454	2.55256
TCONS_00085847	LINE	L1	L1PA6	chr3	41277829	41279783	intron_35	ULK4	exon_36	-	SK-MEL-2	12.8433
TCONS_00086600	LINE	L1	L1PA2	chr3	58842154	58848179	Intergenic	FAM3D	exon_2	-	COV413A	0.396506
TCONS_00086600	LINE	L1	L1PA2	chr3	58842154	58848179	Intergenic	FAM3D	exon_2	-	NCI-H1623	13.0171
TCONS_00086600	LINE	L1	L1PA2	chr3	58842154	58848179	Intergenic	FAM3D	exon_2	-	NCI-H2110	2.76657
TCONS_00086600	LINE	L1	L1PA2	chr3	58842154	58848179	Intergenic	FAM3D	exon_2	-	NCI-H716	6.29871
TCONS_00086600	LINE	L1	L1PA2	chr3	58842154	58848179	Intergenic	FAM3D	exon_2	-	NCI-H929	1.38909
TCONS_00086600	LINE	L1	L1PA2	chr3	58842154	58848179	Intergenic	FAM3D	exon_2	-	SNU-475	1.84587
TCONS_00086953	LINE	L1	L1PBa	chr3	101484371	101487275	intron_3	SENP7	exon_4	-	SNU-475	1.4909
TCONS_00087188	LINE	L1	L1PA2	chr3	118914243	118920271	intron_4	IGSF11	exon_5	-	DMS 53	3.03475
TCONS_00087188	LINE	L1	L1PA2	chr3	118914243	118920271	intron_4	IGSF11	exon_5	-	NCI-H1623	3.07931
TCONS_00087188	LINE	L1	L1PA2	chr3	118914243	118920271	intron_4	IGSF11	exon_5	-	NCI-H716	1.24317
TCONS_00087243	LINE	L1	L1PA2	chr3	120372615	120378640	Intergenic	LRRC58	exon_2	-	DMS 454	3.42417
TCONS_00087243	LINE	L1	L1PA2	chr3	120372615	120378640	Intergenic	LRRC58	exon_2	-	DMS 53	2.97406
TCONS_00087243	LINE	L1	L1PA2	chr3	120372615	120378640	Intergenic	LRRC58	exon_2	-	NCI-H1623	17.916
TCONS_00087243	LINE	L1	L1PA2	chr3	120372615	120378640	Intergenic	LRRC58	exon_2	-	NCI-H2228	1.89225
TCONS_00087243	LINE	L1	L1PA2	chr3	120372615	120378640	Intergenic	LRRC58	exon_2	-	NCI-H716	1.57468
TCONS_00087243	LINE	L1	L1PA2	chr3	120372615	120378640	Intergenic	LRRC58	exon_2	-	NCI-H929	1.01867
TCONS_00087243	LINE	L1	L1PA2	chr3	120372615	120378640	Intergenic	LRRC58	exon_2	-	SNU-475	1.91687
TCONS_00087284	LINE	L1	L1M4c	chr3	122047941	122048810	Intergenic	ILDR1	exon_2	-	DMS 53	3.09545
TCONS_00087284	LINE	L1	L1M4c	chr3	122047941	122048810	Intergenic	ILDR1	exon_2	-	NCI-H716	0.331511
TCONS_00087284	LINE	L1	L1M4c	chr3	122047941	122048810	Intergenic	ILDR1	exon_2	-	SK-MEL-2	2.6551
TCONS_00087284	LINE	L1	L1M4c	chr3	122047941	122048810	Intergenic	ILDR1	exon_2	-	SNU-475	0.851942
TCONS_00087924	LINE	L1	L1PB1	chr3	150022711	150025262	Intergenic	PFN2	exon_2	-	DMS 454	17.9925
TCONS_00087924	LINE	L1	L1PB1	chr3	150022711	150025262	Intergenic	PFN2	exon_2	-	NCI-H716	0.911655
TCONS_00087924	LINE	L1	L1PB1	chr3	150022711	150025262	Intergenic	PFN2	exon_2	-	SK-MEL-2	1.11144
TCONS_00087924	LINE	L1	L1PB1	chr3	150022711	150025262	Intergenic	PFN2	exon_2	-	SNU-475	17.6068
TCONS_00089859	LINE	L1	L1PA3	chr4	61367239	61373248	intron_1	ADGRL3	exon_2	+	NCI-H1623	0.559875
TCONS_00089859	LINE	L1	L1PA3	chr4	61367239	61373248	intron_1	ADGRL3	exon_2	+	NCI-H716	1.32604
TCONS_00089872	LINE	L1	L1PA3	chr4	61641294	61647303	intron_4	ADGRL3	exon_5	+	DMS 53	1.76016
TCONS_00089872	LINE	L1	L1PA3	chr4	61641294	61647303	intron_4	ADGRL3	exon_5	+	NCI-H1623	5.73872
TCONS_00089872	LINE	L1	L1PA3	chr4	61641294	61647303	intron_4	ADGRL3	exon_5	+	NCI-H716	11.6029
TCONS_00090192	LINE	L1	L1PA3	chr4	78301853	78307882	intron_14	FRAS1	exon_15	+	DMS 53	0.364171
TCONS_00090317	LINE	L1	L1PA2	chr4	87710373	87716399	Intergenic	IBSP	exon_1	+	DMS 53	12.2604
TCONS_00090317	LINE	L1	L1PA2	chr4	87710373	87716399	Intergenic	IBSP	exon_1	+	NCI-H1623	12.5972
TCONS_00090317	LINE	L1	L1PA2	chr4	87710373	87716399	Intergenic	IBSP	exon_1	+	NCI-H2228	7.569
TCONS_00090317	LINE	L1	L1PA2	chr4	87710373	87716399	Intergenic	IBSP	exon_1	+	NCI-H716	3.89525
TCONS_00090317	LINE	L1	L1PA2	chr4	87710373	87716399	Intergenic	IBSP	exon_1	+	NCI-H929	3.98207
TCONS_00090317	LINE	L1	L1PA2	chr4	87710373	87716399	Intergenic	IBSP	exon_1	+	SNU-475	3.69175
TCONS_00090783	LINE	L1	L1PA2	chr4	119274113	119280127	intron_13	USP53	exon_14	+	NCI-H1623	0.979782
TCONS_00090783	LINE	L1	L1PA2	chr4	119274113	119280127	intron_13	USP53	exon_14	+	NCI-H2110	1.22244
TCONS_00090783	LINE	L1	L1PA2	chr4	119274113	119280127	intron_13	USP53	exon_14	+	NCI-H716	5.13842
TCONS_00092567	LINE	L1	L1PA2	chr4	67967414	67973442	Intergenic	TMPRSS11A	exon_2	-	NCI-H1623	1.53966
TCONS_00092567	LINE	L1	L1PA2	chr4	67967414	67973442	Intergenic	TMPRSS11A	exon_2	-	NCI-H2110	0.321694
TCONS_00092987	LINE	L1	L1PA2	chr4	87710373	87716399	Intergenic	SPARCL1	exon_2	-	DMS 53	8.55801
TCONS_00092987	LINE	L1	L1PA2	chr4	87710373	87716399	Intergenic	SPARCL1	exon_2	-	NCI-H1623	14.4168
TCONS_00092987	LINE	L1	L1PA2	chr4	87710373	87716399	Intergenic	SPARCL1	exon_2	-	NCI-H2110	0.321694
TCONS_00092987	LINE	L1	L1PA2	chr4	87710373	87716399	Intergenic	SPARCL1	exon_2	-	NCI-H2228	11.2807
TCONS_00092987	LINE	L1	L1PA2	chr4	87710373	87716399	Intergenic	SPARCL1	exon_2	-	NCI-H716	4.88979
TCONS_00092987	LINE	L1	L1PA2	chr4	87710373	87716399	Intergenic	SPARCL1	exon_2	-	NCI-H929	3.14861
TCONS_00092987	LINE	L1	L1PA2	chr4	87710373	87716399	Intergenic	SPARCL1	exon_2	-	SK-MEL-2	0.370479
TCONS_00092987	LINE	L1	L1PA2	chr4	87710373	87716399	Intergenic	SPARCL1	exon_2	-	SNU-475	2.9818
TCONS_00093085	LINE	L1	L1HS	chr4	98592435	98598463	intron_1	TSPAN5	exon_2	-	NCI-H1623	0.699844
TCONS_00093085	LINE	L1	L1HS	chr4	98592435	98598463	intron_1	TSPAN5	exon_2	-	SK-MEL-2	0.740958
TCONS_00093163	LINE	L1	L1PA4	chr4	102374729	102380899	Intergenic	SLC39A8	exon_2	-	NCI-H1623	2.2395
TCONS_00093163	LINE	L1	L1PA4	chr4	102374729	102380899	Intergenic	SLC39A8	exon_2	-	NCI-H2110	1.67281
TCONS_00093163	LINE	L1	L1PA4	chr4	102374729	102380899	Intergenic	SLC39A8	exon_2	-	NCI-H929	2.31516
TCONS_00093164	LINE	L1	L1PA4	chr4	102374729	102380899	Intergenic	SLC39A8	exon_1	-	NCI-H1623	2.2395
TCONS_00093164	LINE	L1	L1PA4	chr4	102374729	102380899	Intergenic	SLC39A8	exon_1	-	NCI-H2110	1.67281
TCONS_00093164	LINE	L1	L1PA4	chr4	102374729	102380899	Intergenic	SLC39A8	exon_1	-	NCI-H929	2.31516
TCONS_00093660	LINE	L1	L1PA2	chr4	140413342	140419363	intron_1	CLGN	exon_2	-	DMS 454	0.622576
TCONS_00093660	LINE	L1	L1PA2	chr4	140413342	140419363	intron_1	CLGN	exon_2	-	DMS 53	0.849731
TCONS_00093660	LINE	L1	L1PA2	chr4	140413342	140419363	intron_1	CLGN	exon_2	-	SK-MEL-2	0.679212
TCONS_00093660	LINE	L1	L1PA2	chr4	140413342	140419363	intron_1	CLGN	exon_2	-	SNU-475	1.13592
TCONS_00093973	LINE	L1	L1PA2	chr4	164350749	164356776	intron_1	MARCH1	exon_2	-	DMS 53	13.1708
TCONS_00093973	LINE	L1	L1PA2	chr4	164350749	164356776	intron_1	MARCH1	exon_2	-	NCI-H1623	7.41835
TCONS_00093973	LINE	L1	L1PA2	chr4	164350749	164356776	intron_1	MARCH1	exon_2	-	NCI-H716	2.9836
TCONS_00093973	LINE	L1	L1PA2	chr4	164350749	164356776	intron_1	MARCH1	exon_2	-	SK-MEL-2	1.42017
TCONS_00094016	LINE	L1	L1PA3	chr4	167055311	167058094	intron_2	SPOCK3	exon_3	-	DMS 53	0.606951
TCONS_00094138	LINE	L1	L1PA2	chr4	174778462	174784478	intron_2	GLRA3	exon_3	-	DMS 53	0.789036
TCONS_00094138	LINE	L1	L1PA2	chr4	174778462	174784478	intron_2	GLRA3	exon_3	-	NCI-H1623	1.11975
TCONS_00094138	LINE	L1	L1PA2	chr4	174778462	174784478	intron_2	GLRA3	exon_3	-	NCI-H716	0.331511
TCONS_00094443	LINE	L1	L1P2	chr5	6646413	6649889	intron_1	SRD5A1	exon_2	+	NCI-H716	1.57468
TCONS_00095073	LINE	L1	L1PA2	chr5	64709034	64715065	intron_2	FAM159B	exon_3	+	NCI-H716	0.580144
TCONS_00095263	LINE	L1	L1PA2	chr5	71604580	71610593	intron_6	MCCC2	exon_7	+	NCI-H1623	4.61897
TCONS_00095355	LINE	L1	L1PA2	chr5	75642235	75648286	intron_7	ANKDD1B	exon_8	+	DMS 454	0.622576
TCONS_00095355	LINE	L1	L1PA2	chr5	75642235	75648286	intron_7	ANKDD1B	exon_8	+	DMS 53	1.33529
TCONS_00095355	LINE	L1	L1PA2	chr5	75642235	75648286	intron_7	ANKDD1B	exon_8	+	NCI-H1623	24.6345
TCONS_00095355	LINE	L1	L1PA2	chr5	75642235	75648286	intron_7	ANKDD1B	exon_8	+	NCI-H2110	0.321694
TCONS_00095355	LINE	L1	L1PA2	chr5	75642235	75648286	intron_7	ANKDD1B	exon_8	+	NCI-H716	4.97266
TCONS_00095908	LINE	L1	L1PB4	chr5	116112685	116115453	intron_4	COMMD10	exon_5	+	NCI-H2110	1.93016
TCONS_00096070	LINE	L1	L1PA3	chr5	127747107	127753135	intron_2	CCDC192	exon_3	+	DMS 53	1.39599
TCONS_00096070	LINE	L1	L1PA3	chr5	127747107	127753135	intron_2	CCDC192	exon_3	+	NCI-H1623	0.559875
TCONS_00096651	LINE	L1	L1PA2	chr5	147715845	147721872	Intergenic	SPINK5	exon_1	+	DMS 53	1.09251
TCONS_00096651	LINE	L1	L1PA2	chr5	147715845	147721872	Intergenic	SPINK5	exon_1	+	NCI-H1623	3.21928
TCONS_00096651	LINE	L1	L1PA2	chr5	147715845	147721872	Intergenic	SPINK5	exon_1	+	NCI-H716	0.414389
TCONS_00096651	LINE	L1	L1PA2	chr5	147715845	147721872	Intergenic	SPINK5	exon_1	+	SK-MEL-2	0.802705
TCONS_00096652	LINE	L1	L1PA2	chr5	147715845	147721872	Intergenic	SCGB3A2	exon_2	+	DMS 53	1.09251
TCONS_00096652	LINE	L1	L1PA2	chr5	147715845	147721872	Intergenic	SCGB3A2	exon_2	+	NCI-H1623	3.21928
TCONS_00096652	LINE	L1	L1PA2	chr5	147715845	147721872	Intergenic	SCGB3A2	exon_2	+	NCI-H716	0.414389
TCONS_00096652	LINE	L1	L1PA2	chr5	147715845	147721872	Intergenic	SCGB3A2	exon_2	+	SK-MEL-2	0.802705
TCONS_00096671	LINE	L1	L1PA3	chr5	147941118	147947133	Intergenic	SPINK5	exon_2	+	NCI-H716	1.24317
TCONS_00096959	LINE	L1	L1PA2	chr5	162030925	162036952	Intergenic	GABRG2	exon_2	+	DMS 454	0.871607
TCONS_00096959	LINE	L1	L1PA2	chr5	162030925	162036952	Intergenic	GABRG2	exon_2	+	DMS 53	43.0328
TCONS_00096959	LINE	L1	L1PA2	chr5	162030925	162036952	Intergenic	GABRG2	exon_2	+	NCI-H1623	17.916
TCONS_00096959	LINE	L1	L1PA2	chr5	162030925	162036952	Intergenic	GABRG2	exon_2	+	NCI-H716	9.94533
TCONS_00096959	LINE	L1	L1PA2	chr5	162030925	162036952	Intergenic	GABRG2	exon_2	+	NCI-H929	25.2815
TCONS_00096959	LINE	L1	L1PA2	chr5	162030925	162036952	Intergenic	GABRG2	exon_2	+	SK-MEL-2	22.9697
TCONS_00097068	LINE	L1	L1PA2	chr5	171083963	171089973	intron_14	RANBP17	exon_15	+	SK-MEL-2	0.308733
TCONS_00098452	LINE	L1	L1PA3	chr5	75695698	75701728	intron_5	POC5	exon_6	-	DMS 53	1.2746
TCONS_00098452	LINE	L1	L1PA3	chr5	75695698	75701728	intron_5	POC5	exon_6	-	NCI-H1623	1.95956
TCONS_00098452	LINE	L1	L1PA3	chr5	75695698	75701728	intron_5	POC5	exon_6	-	NCI-H2110	2.12318
TCONS_00098452	LINE	L1	L1PA3	chr5	75695698	75701728	intron_5	POC5	exon_6	-	NCI-H716	2.40345
TCONS_00098452	LINE	L1	L1PA3	chr5	75695698	75701728	intron_5	POC5	exon_6	-	SNU-475	0.354976
TCONS_00098838	LINE	L1	L1PA2	chr5	102671229	102677260	Intergenic	SLCO6A1	exon_2	-	COV413A	0.726927
TCONS_00098838	LINE	L1	L1PA2	chr5	102671229	102677260	Intergenic	SLCO6A1	exon_2	-	DMS 53	43.7612
TCONS_00098838	LINE	L1	L1PA2	chr5	102671229	102677260	Intergenic	SLCO6A1	exon_2	-	NCI-H1623	19.5956
TCONS_00098838	LINE	L1	L1PA2	chr5	102671229	102677260	Intergenic	SLCO6A1	exon_2	-	NCI-H2228	96.6504
TCONS_00098838	LINE	L1	L1PA2	chr5	102671229	102677260	Intergenic	SLCO6A1	exon_2	-	NCI-H716	39.5327
TCONS_00098838	LINE	L1	L1PA2	chr5	102671229	102677260	Intergenic	SLCO6A1	exon_2	-	NCI-H929	0.555638
TCONS_00098838	LINE	L1	L1PA2	chr5	102671229	102677260	Intergenic	SLCO6A1	exon_2	-	SK-MEL-2	18.6474
TCONS_00098838	LINE	L1	L1PA2	chr5	102671229	102677260	Intergenic	SLCO6A1	exon_2	-	SNU-475	11.6432
TCONS_00099219	LINE	L1	L1PA2	chr5	132513964	132519996	Intergenic	IRF1	exon_1	-	DMS 53	0.546256
TCONS_00099219	LINE	L1	L1PA2	chr5	132513964	132519996	Intergenic	IRF1	exon_1	-	NCI-H1623	1.11975
TCONS_00099219	LINE	L1	L1PA2	chr5	132513964	132519996	Intergenic	IRF1	exon_1	-	NCI-H2110	1.73715
TCONS_00099219	LINE	L1	L1PA2	chr5	132513964	132519996	Intergenic	IRF1	exon_1	-	NCI-H716	0.331511
TCONS_00099220	LINE	L1	L1PA2	chr5	132513964	132519996	Intergenic	IRF1	exon_2	-	DMS 53	0.546256
TCONS_00099220	LINE	L1	L1PA2	chr5	132513964	132519996	Intergenic	IRF1	exon_2	-	NCI-H1623	1.11975
TCONS_00099220	LINE	L1	L1PA2	chr5	132513964	132519996	Intergenic	IRF1	exon_2	-	NCI-H2110	1.73715
TCONS_00099220	LINE	L1	L1PA2	chr5	132513964	132519996	Intergenic	IRF1	exon_2	-	NCI-H716	0.331511
TCONS_00102874	LINE	L1	L1PA3	chr6	133142073	133148104	Intergenic	EYA4	exon_2	+	DMS 53	4.30935
TCONS_00102874	LINE	L1	L1PA3	chr6	133142073	133148104	Intergenic	EYA4	exon_2	+	NCI-H929	2.22255
TCONS_00102874	LINE	L1	L1PA3	chr6	133142073	133148104	Intergenic	EYA4	exon_2	+	SK-MEL-2	0.432226
TCONS_00102874	LINE	L1	L1PA3	chr6	133142073	133148104	Intergenic	EYA4	exon_2	+	SNU-475	1.20692
TCONS_00103419	LINE	L1	L1PA2	chr6	162838592	162844620	intron_2	PACRG	exon_3	+	DMS 53	0.303475
TCONS_00103495	LINE	L1	L1ME2z	chr6	168585258	168586852	intron_7	SMOC2	exon_8	+	NCI-H1623	6.2986
TCONS_00103663	LINE	L1	L1PB1	chr6	7347074	7349650	intron_8	CAGE1	exon_9	-	COV413A	0.396506
TCONS_00103663	LINE	L1	L1PB1	chr6	7347074	7349650	intron_8	CAGE1	exon_9	-	DMS 454	0.622576
TCONS_00103663	LINE	L1	L1PB1	chr6	7347074	7349650	intron_8	CAGE1	exon_9	-	NCI-H1623	49.6889
TCONS_00103663	LINE	L1	L1PB1	chr6	7347074	7349650	intron_8	CAGE1	exon_9	-	NCI-H2110	18.0792
TCONS_00103663	LINE	L1	L1PB1	chr6	7347074	7349650	intron_8	CAGE1	exon_9	-	SNU-475	0.425971
TCONS_00103692	LINE	L1	L1PA3	chr6	9810750	9816777	intron_4	OFCC1	exon_5	-	NCI-H1623	2.37947
TCONS_00103692	LINE	L1	L1PA3	chr6	9810750	9816777	intron_4	OFCC1	exon_5	-	NCI-H716	6.05007
TCONS_00103692	LINE	L1	L1PA3	chr6	9810750	9816777	intron_4	OFCC1	exon_5	-	SNU-475	1.91687
TCONS_00103699	LINE	L1	L1P1	chr6	10133964	10134589	Intergenic	OFCC1	exon_1	-	DMS 454	0.311288
TCONS_00103699	LINE	L1	L1P1	chr6	10133964	10134589	Intergenic	OFCC1	exon_1	-	NCI-H716	3.14935
TCONS_00104856	LINE	L1	L1PA2	chr6	45062447	45068476	intron_5	SUPT3H	exon_6	-	DMS 53	1.03182
TCONS_00104856	LINE	L1	L1PA2	chr6	45062447	45068476	intron_5	SUPT3H	exon_6	-	NCI-H1623	2.2395
TCONS_00104856	LINE	L1	L1PA2	chr6	45062447	45068476	intron_5	SUPT3H	exon_6	-	NCI-H2110	2.12318
TCONS_00104856	LINE	L1	L1PA2	chr6	45062447	45068476	intron_5	SUPT3H	exon_6	-	NCI-H2228	0.727789
TCONS_00104856	LINE	L1	L1PA2	chr6	45062447	45068476	intron_5	SUPT3H	exon_6	-	NCI-H716	3.31511
TCONS_00104964	LINE	L1	L1PA3	chr6	51895656	51901683	intron_43	PKHD1	exon_44	-	NCI-H929	0.463031
TCONS_00105120	LINE	L1	L1PA2	chr6	64389760	64395796	intron_28	EYS	exon_29	-	DMS 53	0.849731
TCONS_00105120	LINE	L1	L1PA2	chr6	64389760	64395796	intron_28	EYS	exon_29	-	NCI-H1623	1.25972
TCONS_00105335	LINE	L1	L1HS	chr6	83333952	83339981	intron_5	ME1	exon_6	-	DMS 53	1.82085
TCONS_00105335	LINE	L1	L1HS	chr6	83333952	83339981	intron_5	ME1	exon_6	-	NCI-H2110	1.9945
TCONS_00105335	LINE	L1	L1HS	chr6	83333952	83339981	intron_5	ME1	exon_6	-	NCI-H716	2.32058
TCONS_00105335	LINE	L1	L1HS	chr6	83333952	83339981	intron_5	ME1	exon_6	-	SK-MEL-2	0.370479
TCONS_00105455	LINE	L1	L1PA2	chr6	89225263	89231287	Intergenic	GABRR1	exon_3	-	NCI-H1623	4.61897
TCONS_00105455	LINE	L1	L1PA2	chr6	89225263	89231287	Intergenic	GABRR1	exon_3	-	NCI-H716	0.994533
TCONS_00105455	LINE	L1	L1PA2	chr6	89225263	89231287	Intergenic	GABRR1	exon_3	-	SNU-475	0.425971
TCONS_00107032	LINE	L1	L1HS	chr7	12497211	12500000	Intergenic	AC005281.1	exon_2	+	COV413A	0.726927
TCONS_00107032	LINE	L1	L1HS	chr7	12497211	12500000	Intergenic	AC005281.1	exon_2	+	DMS 454	5.47867
TCONS_00107032	LINE	L1	L1HS	chr7	12497211	12500000	Intergenic	AC005281.1	exon_2	+	DMS 53	6.91924
TCONS_00107032	LINE	L1	L1HS	chr7	12497211	12500000	Intergenic	AC005281.1	exon_2	+	NCI-H1623	11.1975
TCONS_00107032	LINE	L1	L1HS	chr7	12497211	12500000	Intergenic	AC005281.1	exon_2	+	NCI-H2110	2.3162
TCONS_00107032	LINE	L1	L1HS	chr7	12497211	12500000	Intergenic	AC005281.1	exon_2	+	NCI-H2228	1.74669
TCONS_00107032	LINE	L1	L1HS	chr7	12497211	12500000	Intergenic	AC005281.1	exon_2	+	NCI-H716	12.4317
TCONS_00107032	LINE	L1	L1HS	chr7	12497211	12500000	Intergenic	AC005281.1	exon_2	+	NCI-H929	1.94473
TCONS_00107032	LINE	L1	L1HS	chr7	12497211	12500000	Intergenic	AC005281.1	exon_2	+	SK-MEL-2	25.4396
TCONS_00107032	LINE	L1	L1HS	chr7	12497211	12500000	Intergenic	AC005281.1	exon_2	+	SNU-475	4.18871
TCONS_00107035	LINE	L1	L1HS	chr7	12497211	12500000	Intergenic	AC005281.1	exon_5	+	COV413A	0.726927
TCONS_00107035	LINE	L1	L1HS	chr7	12497211	12500000	Intergenic	AC005281.1	exon_5	+	DMS 454	5.47867
TCONS_00107035	LINE	L1	L1HS	chr7	12497211	12500000	Intergenic	AC005281.1	exon_5	+	DMS 53	6.91924
TCONS_00107035	LINE	L1	L1HS	chr7	12497211	12500000	Intergenic	AC005281.1	exon_5	+	NCI-H1623	11.1975
TCONS_00107035	LINE	L1	L1HS	chr7	12497211	12500000	Intergenic	AC005281.1	exon_5	+	NCI-H2110	2.3162
TCONS_00107035	LINE	L1	L1HS	chr7	12497211	12500000	Intergenic	AC005281.1	exon_5	+	NCI-H2228	1.74669
TCONS_00107035	LINE	L1	L1HS	chr7	12497211	12500000	Intergenic	AC005281.1	exon_5	+	NCI-H716	12.4317
TCONS_00107035	LINE	L1	L1HS	chr7	12497211	12500000	Intergenic	AC005281.1	exon_5	+	NCI-H929	1.94473
TCONS_00107035	LINE	L1	L1HS	chr7	12497211	12500000	Intergenic	AC005281.1	exon_5	+	SK-MEL-2	25.4396
TCONS_00107035	LINE	L1	L1HS	chr7	12497211	12500000	Intergenic	AC005281.1	exon_5	+	SNU-475	4.18871
TCONS_00107037	LINE	L1	L1HS	chr7	12497211	12500000	Intergenic	SCIN	exon_2	+	COV413A	0.726927
TCONS_00107037	LINE	L1	L1HS	chr7	12497211	12500000	Intergenic	SCIN	exon_2	+	DMS 454	5.47867
TCONS_00107037	LINE	L1	L1HS	chr7	12497211	12500000	Intergenic	SCIN	exon_2	+	DMS 53	6.91924
TCONS_00107037	LINE	L1	L1HS	chr7	12497211	12500000	Intergenic	SCIN	exon_2	+	NCI-H1623	11.1975
TCONS_00107037	LINE	L1	L1HS	chr7	12497211	12500000	Intergenic	SCIN	exon_2	+	NCI-H2110	2.3162
TCONS_00107037	LINE	L1	L1HS	chr7	12497211	12500000	Intergenic	SCIN	exon_2	+	NCI-H2228	1.74669
TCONS_00107037	LINE	L1	L1HS	chr7	12497211	12500000	Intergenic	SCIN	exon_2	+	NCI-H716	12.4317
TCONS_00107037	LINE	L1	L1HS	chr7	12497211	12500000	Intergenic	SCIN	exon_2	+	NCI-H929	1.94473
TCONS_00107037	LINE	L1	L1HS	chr7	12497211	12500000	Intergenic	SCIN	exon_2	+	SK-MEL-2	25.4396
TCONS_00107037	LINE	L1	L1HS	chr7	12497211	12500000	Intergenic	SCIN	exon_2	+	SNU-475	4.18871
TCONS_00107202	LINE	L1	L1P2	chr7	23721816	23723200	intron_4	STK31	exon_5	+	DMS 53	5.64464
TCONS_00107202	LINE	L1	L1P2	chr7	23721816	23723200	intron_4	STK31	exon_5	+	NCI-H1623	9.65785
TCONS_00107202	LINE	L1	L1P2	chr7	23721816	23723200	intron_4	STK31	exon_5	+	NCI-H2110	26.0572
TCONS_00107202	LINE	L1	L1P2	chr7	23721816	23723200	intron_4	STK31	exon_5	+	NCI-H2228	3.20227
TCONS_00107202	LINE	L1	L1P2	chr7	23721816	23723200	intron_4	STK31	exon_5	+	NCI-H716	1.98907
TCONS_00107551	LINE	L1	L1PA2	chr7	39007527	39013552	intron_1	POU6F2	exon_2	+	DMS 454	4.29578
TCONS_00107551	LINE	L1	L1PA2	chr7	39007527	39013552	intron_1	POU6F2	exon_2	+	DMS 53	8.07245
TCONS_00107551	LINE	L1	L1PA2	chr7	39007527	39013552	intron_1	POU6F2	exon_2	+	NCI-H1623	2.93934
TCONS_00107551	LINE	L1	L1PA2	chr7	39007527	39013552	intron_1	POU6F2	exon_2	+	NCI-H2228	0.582231
TCONS_00107551	LINE	L1	L1PA2	chr7	39007527	39013552	intron_1	POU6F2	exon_2	+	NCI-H716	15.1666
TCONS_00107551	LINE	L1	L1PA2	chr7	39007527	39013552	intron_1	POU6F2	exon_2	+	NCI-H929	0.463031
TCONS_00107551	LINE	L1	L1PA2	chr7	39007527	39013552	intron_1	POU6F2	exon_2	+	SK-MEL-2	0.432226
TCONS_00107551	LINE	L1	L1PA2	chr7	39007527	39013552	intron_1	POU6F2	exon_2	+	SNU-475	2.41384
TCONS_00108477	LINE	L1	L1PA3	chr7	90634134	90640272	intron_2	CDK14	exon_3	+	DMS 53	0.789036
TCONS_00108477	LINE	L1	L1PA3	chr7	90634134	90640272	intron_2	CDK14	exon_3	+	NCI-H1623	0.699844
TCONS_00108477	LINE	L1	L1PA3	chr7	90634134	90640272	intron_2	CDK14	exon_3	+	NCI-H716	0.497266
TCONS_00108483	LINE	L1	L1HS	chr7	91173443	91179517	intron_14	CDK14	exon_15	+	NCI-H716	2.07194
TCONS_00108483	LINE	L1	L1HS	chr7	91173443	91179517	intron_14	CDK14	exon_15	+	SK-MEL-2	0.802705
TCONS_00108522	LINE	L1	L1PA2	chr7	93586902	93591767	Intergenic	GNGT1	exon_1	+	DMS 454	50.6155
TCONS_00108522	LINE	L1	L1PA2	chr7	93586902	93591767	Intergenic	GNGT1	exon_1	+	DMS 53	128.613
TCONS_00108522	LINE	L1	L1PA2	chr7	93586902	93591767	Intergenic	GNGT1	exon_1	+	NCI-H1623	84.5411
TCONS_00108522	LINE	L1	L1PA2	chr7	93586902	93591767	Intergenic	GNGT1	exon_1	+	NCI-H2110	90.2674
TCONS_00108522	LINE	L1	L1PA2	chr7	93586902	93591767	Intergenic	GNGT1	exon_1	+	NCI-H2228	42.5756
TCONS_00108522	LINE	L1	L1PA2	chr7	93586902	93591767	Intergenic	GNGT1	exon_1	+	NCI-H716	136.002
TCONS_00108522	LINE	L1	L1PA2	chr7	93586902	93591767	Intergenic	GNGT1	exon_1	+	NCI-H929	0.833456
TCONS_00108522	LINE	L1	L1PA2	chr7	93586902	93591767	Intergenic	GNGT1	exon_1	+	SK-MEL-2	20.3763
TCONS_00108522	LINE	L1	L1PA2	chr7	93586902	93591767	Intergenic	GNGT1	exon_1	+	SNU-475	19.4527
TCONS_00108523	LINE	L1	L1PA2	chr7	93586902	93591767	Intergenic	GNGT1	exon_1	+	DMS 454	50.6155
TCONS_00108523	LINE	L1	L1PA2	chr7	93586902	93591767	Intergenic	GNGT1	exon_1	+	DMS 53	128.613
TCONS_00108523	LINE	L1	L1PA2	chr7	93586902	93591767	Intergenic	GNGT1	exon_1	+	NCI-H1623	84.5411
TCONS_00108523	LINE	L1	L1PA2	chr7	93586902	93591767	Intergenic	GNGT1	exon_1	+	NCI-H2110	90.2674
TCONS_00108523	LINE	L1	L1PA2	chr7	93586902	93591767	Intergenic	GNGT1	exon_1	+	NCI-H2228	42.5756
TCONS_00108523	LINE	L1	L1PA2	chr7	93586902	93591767	Intergenic	GNGT1	exon_1	+	NCI-H716	136.002
TCONS_00108523	LINE	L1	L1PA2	chr7	93586902	93591767	Intergenic	GNGT1	exon_1	+	NCI-H929	0.833456
TCONS_00108523	LINE	L1	L1PA2	chr7	93586902	93591767	Intergenic	GNGT1	exon_1	+	SK-MEL-2	20.3763
TCONS_00108523	LINE	L1	L1PA2	chr7	93586902	93591767	Intergenic	GNGT1	exon_1	+	SNU-475	19.4527
TCONS_00108583	LINE	L1	L1PA3	chr7	95831968	95837992	intron_5	DYNC1I1	exon_6	+	NCI-H1623	13.437
TCONS_00108583	LINE	L1	L1PA3	chr7	95831968	95837992	intron_5	DYNC1I1	exon_6	+	NCI-H716	4.97266
TCONS_00108583	LINE	L1	L1PA3	chr7	95831968	95837992	intron_5	DYNC1I1	exon_6	+	SNU-475	3.33677
TCONS_00108892	LINE	L1	L1PA5	chr7	103244596	103250743	Intergenic	PMPCB	exon_1	+	DMS 53	6.1302
TCONS_00108892	LINE	L1	L1PA5	chr7	103244596	103250743	Intergenic	PMPCB	exon_1	+	NCI-H1623	6.99844
TCONS_00108892	LINE	L1	L1PA5	chr7	103244596	103250743	Intergenic	PMPCB	exon_1	+	NCI-H2110	8.81442
TCONS_00108892	LINE	L1	L1PA5	chr7	103244596	103250743	Intergenic	PMPCB	exon_1	+	NCI-H2228	4.22118
TCONS_00108892	LINE	L1	L1PA5	chr7	103244596	103250743	Intergenic	PMPCB	exon_1	+	NCI-H716	1.07741
TCONS_00110298	LINE	L1	L1HS	chr7	7465092	7471120	intron_15	COL28A1	exon_16	-	DMS 53	17.9657
TCONS_00110298	LINE	L1	L1HS	chr7	7465092	7471120	intron_15	COL28A1	exon_16	-	NCI-H2110	7.4633
TCONS_00110298	LINE	L1	L1HS	chr7	7465092	7471120	intron_15	COL28A1	exon_16	-	NCI-H716	20.8023
TCONS_00110298	LINE	L1	L1HS	chr7	7465092	7471120	intron_15	COL28A1	exon_16	-	SNU-475	1.70388
TCONS_00110387	LINE	L1	L1PA2	chr7	16216428	16222457	intron_8	ISPD	exon_9	-	DMS 53	2.54919
TCONS_00110387	LINE	L1	L1PA2	chr7	16216428	16222457	intron_8	ISPD	exon_9	-	NCI-H2110	1.22244
TCONS_00110387	LINE	L1	L1PA2	chr7	16216428	16222457	intron_8	ISPD	exon_9	-	NCI-H716	0.580144
TCONS_00110390	LINE	L1	HAL1	chr7	16318983	16319538	intron_3	ISPD	exon_4	-	NCI-H716	1.74043
TCONS_00110779	LINE	L1	L1PA3	chr7	36552965	36559126	intron_13	AOAH	exon_14	-	NCI-H2110	1.09376
TCONS_00110779	LINE	L1	L1PA3	chr7	36552965	36559126	intron_13	AOAH	exon_14	-	NCI-H2228	0.582231
TCONS_00111625	LINE	L1	L1PA3	chr7	83024096	83030124	intron_3	PCLO	exon_4	-	SK-MEL-2	0.987944
TCONS_00111632	LINE	L1	L1PA2	chr7	83989325	83995342	intron_12	SEMA3A	exon_13	-	DMS 53	0.424866
TCONS_00111632	LINE	L1	L1PA2	chr7	83989325	83995342	intron_12	SEMA3A	exon_13	-	NCI-H1623	1.11975
TCONS_00111632	LINE	L1	L1PA2	chr7	83989325	83995342	intron_12	SEMA3A	exon_13	-	SNU-475	0.496966
TCONS_00111633	LINE	L1	L1PA3	chr7	84049711	84055730	intron_5	SEMA3A	exon_6	-	DMS 454	0.311288
TCONS_00111633	LINE	L1	L1PA3	chr7	84049711	84055730	intron_5	SEMA3A	exon_6	-	NCI-H2110	3.53864
TCONS_00111633	LINE	L1	L1PA3	chr7	84049711	84055730	intron_5	SEMA3A	exon_6	-	NCI-H716	2.07194
TCONS_00111635	LINE	L1	L1PA3	chr7	84150229	84151670	intron_1	SEMA3A	exon_2	-	NCI-H716	11.6029
TCONS_00111635	LINE	L1	L1PA3	chr7	84150229	84151670	intron_1	SEMA3A	exon_2	-	SNU-475	0.425971
TCONS_00111676	LINE	L1	L1PA5	chr7	87464899	87468654	intron_3	ABCB4	exon_4	-	DMS 53	0.910426
TCONS_00111779	LINE	L1	L1PA2	chr7	93586902	93591767	Intergenic	CALCR	exon_2	-	DMS 454	4.35803
TCONS_00111779	LINE	L1	L1PA2	chr7	93586902	93591767	Intergenic	CALCR	exon_2	-	DMS 53	8.6794
TCONS_00111779	LINE	L1	L1PA2	chr7	93586902	93591767	Intergenic	CALCR	exon_2	-	NCI-H1623	13.0171
TCONS_00111779	LINE	L1	L1PA2	chr7	93586902	93591767	Intergenic	CALCR	exon_2	-	NCI-H2110	8.55706
TCONS_00111779	LINE	L1	L1PA2	chr7	93586902	93591767	Intergenic	CALCR	exon_2	-	NCI-H2228	3.05671
TCONS_00111779	LINE	L1	L1PA2	chr7	93586902	93591767	Intergenic	CALCR	exon_2	-	NCI-H716	6.63022
TCONS_00111779	LINE	L1	L1PA2	chr7	93586902	93591767	Intergenic	CALCR	exon_2	-	SK-MEL-2	19.8206
TCONS_00111779	LINE	L1	L1PA2	chr7	93586902	93591767	Intergenic	CALCR	exon_2	-	SNU-475	2.9818
TCONS_00112766	LINE	L1	L1PA3	chr7	141980085	141986114	Intergenic	TAS2R38	exon_1	-	DMS 454	2.92611
TCONS_00112766	LINE	L1	L1PA3	chr7	141980085	141986114	Intergenic	TAS2R38	exon_1	-	DMS 53	1.88155
TCONS_00112766	LINE	L1	L1PA3	chr7	141980085	141986114	Intergenic	TAS2R38	exon_1	-	NCI-H1623	19.4557
TCONS_00112766	LINE	L1	L1PA3	chr7	141980085	141986114	Intergenic	TAS2R38	exon_1	-	NCI-H2110	1.22244
TCONS_00112766	LINE	L1	L1PA3	chr7	141980085	141986114	Intergenic	TAS2R38	exon_1	-	NCI-H2228	2.32892
TCONS_00112766	LINE	L1	L1PA3	chr7	141980085	141986114	Intergenic	TAS2R38	exon_1	-	NCI-H716	5.71856
TCONS_00112766	LINE	L1	L1PA3	chr7	141980085	141986114	Intergenic	TAS2R38	exon_1	-	SK-MEL-2	1.8524
TCONS_00113377	LINE	L1	L1PA2	chr8	15555981	15562028	intron_1	TUSC3	exon_2	+	DMS 454	0.809349
TCONS_00113377	LINE	L1	L1PA2	chr8	15555981	15562028	intron_1	TUSC3	exon_2	+	DMS 53	0.606951
TCONS_00113377	LINE	L1	L1PA2	chr8	15555981	15562028	intron_1	TUSC3	exon_2	+	NCI-H716	0.745899
TCONS_00113377	LINE	L1	L1PA2	chr8	15555981	15562028	intron_1	TUSC3	exon_2	+	NCI-H929	1.01867
TCONS_00113377	LINE	L1	L1PA2	chr8	15555981	15562028	intron_1	TUSC3	exon_2	+	SNU-475	0.496966
TCONS_00114258	LINE	L1	L1PA2	chr8	61268015	61274014	Intergenic	CLVS1	exon_2	+	DMS 454	0.498061
TCONS_00114258	LINE	L1	L1PA2	chr8	61268015	61274014	Intergenic	CLVS1	exon_2	+	DMS 53	3.09545
TCONS_00114258	LINE	L1	L1PA2	chr8	61268015	61274014	Intergenic	CLVS1	exon_2	+	NCI-H1623	3.49922
TCONS_00114258	LINE	L1	L1PA2	chr8	61268015	61274014	Intergenic	CLVS1	exon_2	+	NCI-H716	0.331511
TCONS_00114259	LINE	L1	L1PA2	chr8	61268015	61274014	Intergenic	CLVS1	exon_2	+	DMS 454	0.498061
TCONS_00114259	LINE	L1	L1PA2	chr8	61268015	61274014	Intergenic	CLVS1	exon_2	+	DMS 53	3.09545
TCONS_00114259	LINE	L1	L1PA2	chr8	61268015	61274014	Intergenic	CLVS1	exon_2	+	NCI-H1623	3.49922
TCONS_00114259	LINE	L1	L1PA2	chr8	61268015	61274014	Intergenic	CLVS1	exon_2	+	NCI-H716	0.331511
TCONS_00114260	LINE	L1	L1PA2	chr8	61268015	61274014	Intergenic	CLVS1	exon_3	+	DMS 454	0.498061
TCONS_00114260	LINE	L1	L1PA2	chr8	61268015	61274014	Intergenic	CLVS1	exon_3	+	DMS 53	3.09545
TCONS_00114260	LINE	L1	L1PA2	chr8	61268015	61274014	Intergenic	CLVS1	exon_3	+	NCI-H1623	3.49922
TCONS_00114260	LINE	L1	L1PA2	chr8	61268015	61274014	Intergenic	CLVS1	exon_3	+	NCI-H716	0.331511
TCONS_00115043	LINE	L1	L1PA10	chr8	116912387	116913667	Intergenic	AARD	exon_2	+	SK-MEL-2	8.21228
TCONS_00115769	LINE	L1	L1PA2	chr8	10932425	10938427	intron_1	XKR6	exon_2	-	DMS 53	0.667646
TCONS_00115769	LINE	L1	L1PA2	chr8	10932425	10938427	intron_1	XKR6	exon_2	-	NCI-H1623	4.479
TCONS_00115769	LINE	L1	L1PA2	chr8	10932425	10938427	intron_1	XKR6	exon_2	-	NCI-H2110	0.450372
TCONS_00115769	LINE	L1	L1PA2	chr8	10932425	10938427	intron_1	XKR6	exon_2	-	NCI-H2228	0.65501
TCONS_00115769	LINE	L1	L1PA2	chr8	10932425	10938427	intron_1	XKR6	exon_2	-	SK-MEL-2	0.370479
TCONS_00115879	LINE	L1	L1PA3	chr8	14803216	14809243	intron_1	SGCZ	exon_2	-	NCI-H1623	0.839813
TCONS_00116734	LINE	L1	L1PA2	chr8	66949103	66955119	intron_3	TCF24	exon_4	-	COV413A	0.660843
TCONS_00116734	LINE	L1	L1PA2	chr8	66949103	66955119	intron_3	TCF24	exon_4	-	DMS 454	2.92611
TCONS_00116734	LINE	L1	L1PA2	chr8	66949103	66955119	intron_3	TCF24	exon_4	-	DMS 53	7.10132
TCONS_00116734	LINE	L1	L1PA2	chr8	66949103	66955119	intron_3	TCF24	exon_4	-	NCI-H1623	13.0171
TCONS_00116734	LINE	L1	L1PA2	chr8	66949103	66955119	intron_3	TCF24	exon_4	-	NCI-H2110	9.58649
TCONS_00116734	LINE	L1	L1PA2	chr8	66949103	66955119	intron_3	TCF24	exon_4	-	NCI-H716	3.31511
TCONS_00116734	LINE	L1	L1PA2	chr8	66949103	66955119	intron_3	TCF24	exon_4	-	SNU-475	0.922937
TCONS_00117068	LINE	L1	L1PA3	chr8	86586338	86592366	intron_15	CNGB3	exon_16	-	DMS 454	0.373546
TCONS_00117068	LINE	L1	L1PA3	chr8	86586338	86592366	intron_15	CNGB3	exon_16	-	DMS 53	8.74009
TCONS_00117068	LINE	L1	L1PA3	chr8	86586338	86592366	intron_15	CNGB3	exon_16	-	NCI-H1623	15.8165
TCONS_00117068	LINE	L1	L1PA3	chr8	86586338	86592366	intron_15	CNGB3	exon_16	-	NCI-H716	1.57468
TCONS_00117068	LINE	L1	L1PA3	chr8	86586338	86592366	intron_15	CNGB3	exon_16	-	NCI-H929	0.926063
TCONS_00117068	LINE	L1	L1PA3	chr8	86586338	86592366	intron_15	CNGB3	exon_16	-	SK-MEL-2	1.97589
TCONS_00117259	LINE	L1	L1PA2	chr8	98260275	98266293	intron_1	NIPAL2	exon_2	-	DMS 53	0.546256
TCONS_00118405	LINE	L1	L1PA2	chr9	17285003	17291034	intron_6	CNTLN	exon_7	+	DMS 454	0.622576
TCONS_00118405	LINE	L1	L1PA2	chr9	17285003	17291034	intron_6	CNTLN	exon_7	+	DMS 53	3.03475
TCONS_00118405	LINE	L1	L1PA2	chr9	17285003	17291034	intron_6	CNTLN	exon_7	+	NCI-H1623	1.53966
TCONS_00118405	LINE	L1	L1PA2	chr9	17285003	17291034	intron_6	CNTLN	exon_7	+	NCI-H2110	2.05884
TCONS_00118405	LINE	L1	L1PA2	chr9	17285003	17291034	intron_6	CNTLN	exon_7	+	NCI-H716	2.81784
TCONS_00118501	LINE	L1	L1M1	chr9	22216506	22217927	Intergenic	DMRTA1	exon_2	+	NCI-H1623	2.2395
TCONS_00118501	LINE	L1	L1M1	chr9	22216506	22217927	Intergenic	DMRTA1	exon_2	+	NCI-H716	7.95626
TCONS_00118501	LINE	L1	L1M1	chr9	22216506	22217927	Intergenic	DMRTA1	exon_2	+	SK-MEL-2	82.9256
TCONS_00118501	LINE	L1	L1M1	chr9	22216506	22217927	Intergenic	DMRTA1	exon_2	+	SNU-475	3.54976
TCONS_00118954	LINE	L1	L1PA3	chr9	65709351	65715424	intron_10	CBWD5	exon_11	+	DMS 454	4.60706
TCONS_00118954	LINE	L1	L1PA3	chr9	65709351	65715424	intron_10	CBWD5	exon_11	+	NCI-H1623	6.01866
TCONS_00118954	LINE	L1	L1PA3	chr9	65709351	65715424	intron_10	CBWD5	exon_11	+	NCI-H2228	5.45842
TCONS_00118954	LINE	L1	L1PA3	chr9	65709351	65715424	intron_10	CBWD5	exon_11	+	NCI-H716	2.73496
TCONS_00119047	LINE	L1	L1PA2	chr9	70199056	70205081	intron_11	MAMDC2	exon_12	+	NCI-H1623	0.559875
TCONS_00119408	LINE	L1	L1PA2	chr9	94089082	94095103	intron_4	PTPDC1	exon_5	+	COV413A	0.330421
TCONS_00119408	LINE	L1	L1PA2	chr9	94089082	94095103	intron_4	PTPDC1	exon_5	+	NCI-H1623	1.95956
TCONS_00119408	LINE	L1	L1PA2	chr9	94089082	94095103	intron_4	PTPDC1	exon_5	+	NCI-H2110	0.450372
TCONS_00119408	LINE	L1	L1PA2	chr9	94089082	94095103	intron_4	PTPDC1	exon_5	+	NCI-H2228	0.727789
TCONS_00119408	LINE	L1	L1PA2	chr9	94089082	94095103	intron_4	PTPDC1	exon_5	+	NCI-H716	0.331511
TCONS_00119582	LINE	L1	L1PA2	chr9	101102144	101108174	intron_1	PLPPR1	exon_2	+	NCI-H1623	0.419906
TCONS_00120678	LINE	L1	L1PA3	chr9	4605799	4611811	intron_8	SPATA6L	exon_9	-	DMS 454	3.73546
TCONS_00120678	LINE	L1	L1PA3	chr9	4605799	4611811	intron_8	SPATA6L	exon_9	-	NCI-H1623	5.45878
TCONS_00120678	LINE	L1	L1PA3	chr9	4605799	4611811	intron_8	SPATA6L	exon_9	-	NCI-H716	1.57468
TCONS_00120678	LINE	L1	L1PA3	chr9	4605799	4611811	intron_8	SPATA6L	exon_9	-	NCI-H929	0.926063
TCONS_00120872	LINE	L1	L1PA7	chr9	19542232	19545628	intron_7	SLC24A2	exon_8	-	DMS 454	0.311288
TCONS_00120872	LINE	L1	L1PA7	chr9	19542232	19545628	intron_7	SLC24A2	exon_8	-	DMS 53	1.39599
TCONS_00120872	LINE	L1	L1PA7	chr9	19542232	19545628	intron_7	SLC24A2	exon_8	-	NCI-H1623	2.65941
TCONS_00120872	LINE	L1	L1PA7	chr9	19542232	19545628	intron_7	SLC24A2	exon_8	-	NCI-H2110	1.02942
TCONS_00122155	LINE	L1	L1HS	chr9	110417102	110423126	intron_36	SVEP1	exon_37	-	NCI-H1623	1.25972
TCONS_00123125	LINE	L1	L1PA3	chrX	7587592	7593752	Intergenic	VCX	exon_2	+	DMS 454	11.1441
TCONS_00123125	LINE	L1	L1PA3	chrX	7587592	7593752	Intergenic	VCX	exon_2	+	NCI-H1623	8.5381
TCONS_00123125	LINE	L1	L1PA3	chrX	7587592	7593752	Intergenic	VCX	exon_2	+	SNU-475	1.56189
TCONS_00123339	LINE	L1	L1PREC2	chrX	22082210	22082782	intron_5	PHEX	exon_6	+	NCI-H716	0.331511
TCONS_00123813	LINE	L1	L1HS	chrX	50019456	50025505	Intergenic	CLCN5	exon_2	+	DMS 53	0.485561
TCONS_00123813	LINE	L1	L1HS	chrX	50019456	50025505	Intergenic	CLCN5	exon_2	+	NCI-H716	0.580144
TCONS_00123957	LINE	L1	L1P2	chrX	56103030	56107860	Intergenic	KLF8	exon_3	+	DMS 454	9.33865
TCONS_00123957	LINE	L1	L1P2	chrX	56103030	56107860	Intergenic	KLF8	exon_3	+	NCI-H1623	6.57853
TCONS_00123958	LINE	L1	L1P2	chrX	56103030	56107860	Intergenic	KLF8	exon_1	+	DMS 454	9.33865
TCONS_00123958	LINE	L1	L1P2	chrX	56103030	56107860	Intergenic	KLF8	exon_1	+	NCI-H1623	6.57853
TCONS_00123959	LINE	L1	L1P2	chrX	56103030	56107860	Intergenic	KLF8	exon_2	+	DMS 454	9.33865
TCONS_00123959	LINE	L1	L1P2	chrX	56103030	56107860	Intergenic	KLF8	exon_2	+	NCI-H1623	6.57853
TCONS_00124514	LINE	L1	L1PA2	chrX	104026871	104032902	Intergenic	H2BFM	exon_1	+	DMS 53	0.606951
TCONS_00124514	LINE	L1	L1PA2	chrX	104026871	104032902	Intergenic	H2BFM	exon_1	+	NCI-H1623	3.35925
TCONS_00124515	LINE	L1	L1PA2	chrX	104026871	104032902	Intergenic	H2BFM	exon_2	+	DMS 53	0.606951
TCONS_00124515	LINE	L1	L1PA2	chrX	104026871	104032902	Intergenic	H2BFM	exon_2	+	NCI-H1623	3.35925
TCONS_00124516	LINE	L1	L1PA2	chrX	104026871	104032902	Intergenic	H2BFM	exon_3	+	DMS 53	0.606951
TCONS_00124516	LINE	L1	L1PA2	chrX	104026871	104032902	Intergenic	H2BFM	exon_3	+	NCI-H1623	3.35925
TCONS_00124691	LINE	L1	L1PA2	chrX	114830697	114836732	intron_4	HTR2C	exon_5	+	DMS 53	2.4885
TCONS_00124691	LINE	L1	L1PA2	chrX	114830697	114836732	intron_4	HTR2C	exon_5	+	NCI-H929	1.4817
TCONS_00125130	LINE	L1	L1PB1	chrX	148735621	148742172	intron_3	AFF2	exon_4	+	SK-MEL-2	0.308733
TCONS_00125723	LINE	L1	L1PB1	chrX	21770311	21772190	Intergenic	SMPX	exon_1	-	NCI-H2228	0.509452
TCONS_00125723	LINE	L1	L1PB1	chrX	21770311	21772190	Intergenic	SMPX	exon_1	-	SK-MEL-2	1.29668
TCONS_00125816	LINE	L1	L1MA3	chrX	32851464	32854639	intron_2	DMD	exon_3	-	DMS 53	1.63877
TCONS_00126238	LINE	L1	L1MCa	chrX	54770401	54771655	intron_6	ITIH6	exon_7	-	DMS 53	1.94224
TCONS_00126238	LINE	L1	L1MCa	chrX	54770401	54771655	intron_6	ITIH6	exon_7	-	NCI-H1623	2.65941
TCONS_00126238	LINE	L1	L1MCa	chrX	54770401	54771655	intron_6	ITIH6	exon_7	-	NCI-H2110	3.66731
TCONS_00126238	LINE	L1	L1MCa	chrX	54770401	54771655	intron_6	ITIH6	exon_7	-	NCI-H2228	0.436673
TCONS_00126238	LINE	L1	L1MCa	chrX	54770401	54771655	intron_6	ITIH6	exon_7	-	NCI-H716	1.24317
TCONS_00126238	LINE	L1	L1MCa	chrX	54770401	54771655	intron_6	ITIH6	exon_7	-	SK-MEL-2	6.42164
TCONS_00126375	LINE	L1	L1PB3	chrX	68216508	68216915	intron_6	OPHN1	exon_7	-	DMS 454	1.1829
TCONS_00126375	LINE	L1	L1PB3	chrX	68216508	68216915	intron_6	OPHN1	exon_7	-	DMS 53	5.03769
TCONS_00126375	LINE	L1	L1PB3	chrX	68216508	68216915	intron_6	OPHN1	exon_7	-	NCI-H1623	1.11975
TCONS_00126375	LINE	L1	L1PB3	chrX	68216508	68216915	intron_6	OPHN1	exon_7	-	NCI-H716	8.95079
TCONS_00126375	LINE	L1	L1PB3	chrX	68216508	68216915	intron_6	OPHN1	exon_7	-	SNU-475	3.62075
TCONS_00126376	LINE	L1	L1PA2	chrX	68216915	68222939	intron_6	OPHN1	exon_7	-	DMS 454	3.29965
TCONS_00126376	LINE	L1	L1PA2	chrX	68216915	68222939	intron_6	OPHN1	exon_7	-	DMS 53	11.4714
TCONS_00126376	LINE	L1	L1PA2	chrX	68216915	68222939	intron_6	OPHN1	exon_7	-	NCI-H1623	3.49922
TCONS_00126376	LINE	L1	L1PA2	chrX	68216915	68222939	intron_6	OPHN1	exon_7	-	NCI-H716	19.3934
TCONS_00126376	LINE	L1	L1PA2	chrX	68216915	68222939	intron_6	OPHN1	exon_7	-	SNU-475	4.68568
TCONS_00126614	LINE	L1	L1PA3	chrX	85421834	85427862	Intergenic	POF1B	exon_2	-	NCI-H1623	0.419906
TCONS_00126614	LINE	L1	L1PA3	chrX	85421834	85427862	Intergenic	POF1B	exon_2	-	NCI-H716	0.331511
TCONS_00126809	LINE	L1	L1PA2	chrX	104026871	104032902	Intergenic	H2BFWT	exon_3	-	DMS 53	1.57807
TCONS_00126809	LINE	L1	L1PA2	chrX	104026871	104032902	Intergenic	H2BFWT	exon_3	-	NCI-H1623	3.77916
TCONS_00126809	LINE	L1	L1PA2	chrX	104026871	104032902	Intergenic	H2BFWT	exon_3	-	NCI-H2110	0.514711
TCONS_00126810	LINE	L1	L1PA2	chrX	104026871	104032902	Intergenic	H2BFWT	exon_2	-	DMS 53	1.57807
TCONS_00126810	LINE	L1	L1PA2	chrX	104026871	104032902	Intergenic	H2BFWT	exon_2	-	NCI-H1623	3.77916
TCONS_00126810	LINE	L1	L1PA2	chrX	104026871	104032902	Intergenic	H2BFWT	exon_2	-	NCI-H2110	0.514711
TCONS_00127316	LINE	L1	L1PA3	chrX	138778307	138784350	intron_1	Z83313.1	exon_2	-	DMS 53	15.1738
TCONS_00127316	LINE	L1	L1PA3	chrX	138778307	138784350	intron_1	Z83313.1	exon_2	-	NCI-H1623	1.81959
TCONS_00127316	LINE	L1	L1PA3	chrX	138778307	138784350	intron_1	Z83313.1	exon_2	-	NCI-H2228	0.363894
TCONS_00127316	LINE	L1	L1PA3	chrX	138778307	138784350	intron_1	Z83313.1	exon_2	-	NCI-H716	1.4918
TCONS_00127316	LINE	L1	L1PA3	chrX	138778307	138784350	intron_1	Z83313.1	exon_2	-	NCI-H929	0.370425
TCONS_00127648	LINE	L1	L1PA2	chrX	155299575	155305601	intron_1	CLIC2	exon_2	-	NCI-H716	38.9525
TCONS_00127648	LINE	L1	L1PA2	chrX	155299575	155305601	intron_1	CLIC2	exon_2	-	SNU-475	2.9108
TCONS_00127659	LINE	L1	L1HS	chrX	155516016	155522048	intron_3	TMLHE	exon_4	-	NCI-H1623	1.11975
TCONS_00127659	LINE	L1	L1HS	chrX	155516016	155522048	intron_3	TMLHE	exon_4	-	NCI-H2110	0.321694
