# Supplementary material for: Pan cancer characterization of genes whose expression has been associated with LINE-1 antisense promoter activity
Source: Mob DNA. 2023 Sep 18;14:13. doi: 10.1186/s13100-023-00300-x (PMC10506190; doi:10.1186/s13100-023-00300-x)
Supplement: Supplementary file 11 — Additional file 11. Table S8. Abbreviations of cancer name. [file 13100_2023_300_MOESM11_ESM.xlsx]

## Sheet: Table S8
abbreviations of cancer name
LIHC: Liver hepatocellular carcinoma
LUSC: Lung squamous cell carcinoma
BRCA: Breast invasive carcinoma
LUAD: Lung adenocarcinoma
GBMLGG: Glioma
PCPG: Pheochromocytoma and Paraganglioma
UCEC:Uterine Corpus Endometrial Carcinoma
HNSC:Head and Neck squamous cell carcinoma
KIPAN:Pan-kidney cohort (KICH+KIRC+KIRP)
PAAD:Pancreatic adenocarcinoma
OV:Ovarian serous cystadenocarcinoma
THYM:Thymoma
KICH:Kidney Chromophobe
THCA:Thyroid carcinoma
BLCA:Bladder Urothelial Carcinoma
PRAD:Prostate adenocarcinoma
KIRP:Kidney renal papillary cell carcinoma
UCEC:Uterine Corpus Endometrial Carcinoma
ESCA:Esophageal carcinoma
COAD:Colon adenocarcinoma
READ:Rectum adenocarcinoma
STAD:Stomach adenocarcinoma
CHOL:Cholangiocarcinoma
GBM:Glioblastoma multiforme
CESC:Cervical squamous cell carcinoma and endocervical adenocarcinoma
SARC:Sarcoma
